# Supplementary material for: C6 picoloyl protection: a remote stereodirecting group for 2-deoxy-β-glycoside formation
Source: Royal Society of Chemistry journal article supplement (doi:10.1039/c4cc08465a), 2014-11-27

## C6 Picoloyl Protection: a Remote Stereodirecting Group for 2-Deoxy- $\beta$ -Glycosidic Formation

Jyh-Herng Ruei, Patteti Venukumar, Arun B. Ingle, and Kwok-Kong Tony Mong,\*

Applied Chemistry Department, National Chiao Tung University (NCTU), 1001 Ta Hsueh Road, Taiwan, Fax: (+886)-3-5131204; *e-mail*: [tmong@mail.nctu.edu.tw](mailto:tmong@mail.nctu.edu.tw).

| <b>Table of Contents</b>                                                                                                                                                                      | <b>Page No.</b> |
|-----------------------------------------------------------------------------------------------------------------------------------------------------------------------------------------------|-----------------|
| 1. General                                                                                                                                                                                    | 2               |
| 2. Experimental Procedures                                                                                                                                                                    | 2-4             |
| 2.1 General glycosylation procedure for 2-deoxydisaccharide derivatives <i>via</i> H-bond mediated aglycone delivery and exact amounts of reagents used in Table 2 of main article (Table S1) |                 |
| 2.2 Preparation of glycosyl donors <b>2a</b> , <b>5-9</b> and acceptor <b>11</b>                                                                                                              | 5-16            |
| 2.3 Preparation of 2-deoxydisaccharides <b>4a</b> , <b>16-28</b>                                                                                                                              | 17-37           |
| 2.4 Synthesis of deoxytrisaccharide component of Landomycins                                                                                                                                  | 38-43           |
| 3. References                                                                                                                                                                                 | 44              |
| 4. Spectroscopic data and HPLC chromatograms                                                                                                                                                  | 45-146          |

## 1. General Materials and Methods

All the chemicals were purchased from Acros,<sup>®</sup> Alpha Aesar,<sup>®</sup> and Sigma Aldrich<sup>®</sup> chemical companies through local agents. Anhydrous solvents were used for the reactions unless otherwise stated. AW300 molecular sieve (MS) (from Aldrich) in powder form was activated before used (Activation protocol: heating at ~300-400 °C with hot gun under high *vacuo* followed by cooling to RT × 3-4 cycles). Exact amount of activated MS used was based on ca. 1.0 g of MS per 100 mg of glycosyl donor). All the reactions were carried out under N<sub>2</sub> or Ar conditions and monitored by thin layer chromatography (TLC) using silica-gel on aluminum plates (60 F-254) and by charring with *p*-anisaldehyde stain or by phosphomolybdic acid (PMA) stain or by ultraviolet (UV) detection. Silica-gel (100-200 mesh) was used for column chromatography to purify all the compounds. HPLC analysis was performed over Mightysil column (Si-60 250-4.6) and eluted with EtOAc/hexane/CH<sub>2</sub>Cl<sub>2</sub> or EtOAc/hexane mixture at a 0.8 or 1 mL min<sup>-1</sup> flow rate. Gradient pump (L-2130) and UV detector (L-2400) from Hitachi were employed for solvent elution and detection respectively. 0.063-0.200 mm Silica gel for column chromatography was obtained from Merck (Geduran Si-60). NMR spectra were recorded by 300 (Büchi console), 400 (Varian console), 500 (Varian console), or 600 (Varian console) MHz NMR spectrometers. The <sup>1</sup>H, <sup>13</sup>C NMR chemical shifts were reported in parts per million (ppm) and tetramethylsilane (TMS) signal was used as a internal standard ( $\delta$  0.00) for <sup>1</sup>H NMR whereas deuterated chloroform (CDCl<sub>3</sub>) signal ( $\delta$  77.0) was used as reference for <sup>13</sup>C NMR. Coupling constants were calculated from <sup>1</sup>H NMR in Hertz (Hz). Optical rotations were measured with AA-65 automatic polarimeter. Acceptor **3** is commercially available and **10**, **12**, **13**, **14**, and **15** are known compounds and corresponding references are given in following procedure.

## 2. Experimental Procedures and Spectral Data

### 2.1 General glycosylation procedure for 2-deoxydisaccharide derivatives:

A mixture of glycosyl donor (0.24 mmol, 1.2 equiv), glycosyl acceptor (0.2 mmol, 1 equiv.) and freshly activated AW300 molecular sieve (MS) (240 mg) in CH<sub>2</sub>Cl<sub>2</sub> (24.0 mL, 10 mM) was stirred under N<sub>2</sub> for 1 h. The mixture was cooled to -50 °C, *N*-iodosuccinimide (NIS) (54 mg, 0.24 mmol, 1.2 equiv.) and trifluoromethanesulfonic acid (TfOH) (4 μL, 0.048 mmol, 0.24 equiv.) were added. The resulting mixture was stirred for 24 h at same temperature. After completion of reaction (TLC), saturated sodium bicarbonate (NaHCO<sub>3</sub>) solution (5.0 mL) was added slowly to the reaction mixture. Then, the mixture was warmed to room temperature, diluted with CH<sub>2</sub>Cl<sub>2</sub> (50 mL) and filtered. The filtrate was washed with satd NaHCO<sub>3</sub> solution (30 mL), 5.0% sodium thiosulfate (Na<sub>2</sub>S<sub>2</sub>O<sub>3</sub>) solution (30 mL), water (30 mL) and dried (Na<sub>2</sub>SO<sub>4</sub>). The solvent was evaporated under reduced pressure to give crude product which was purified by silica-gel column chromatography. Structures of the products and exact amounts of reagents used are given in Table S-1.

**Table S-1: Exact amounts of donors, acceptors, promoters used in glycosylations**

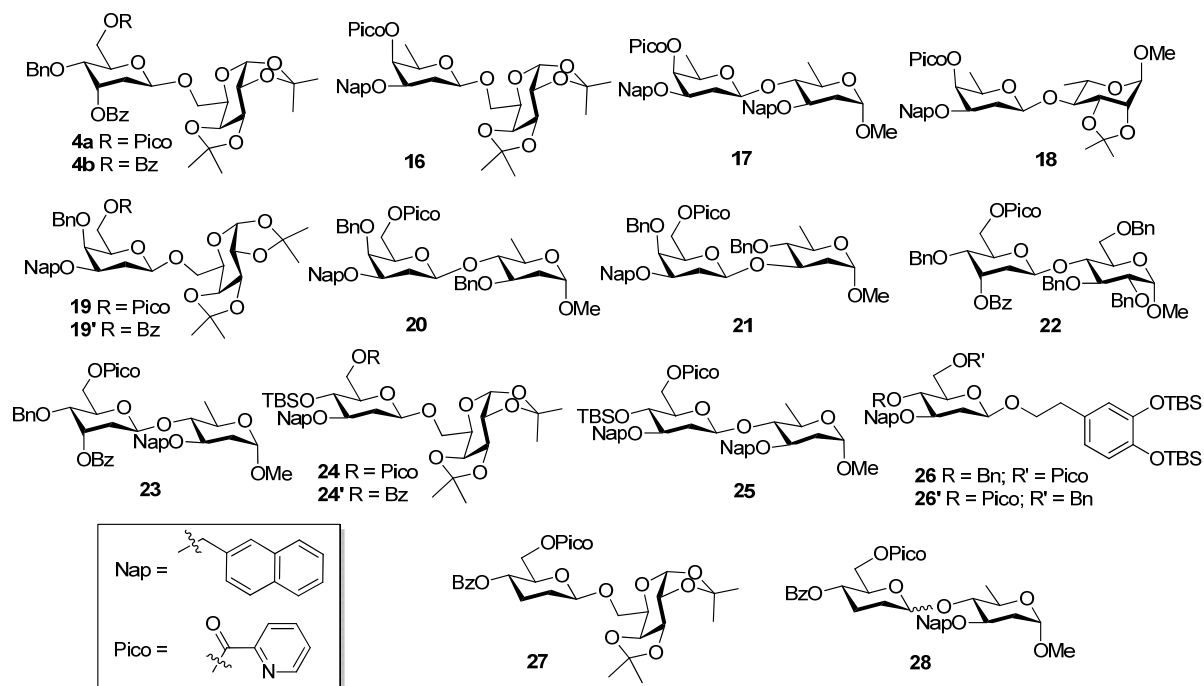

| Entry | Donor (mg, mmol)      | Acceptor (mg, mmol)    | NIS (mg, mmol) | TfOH (μL, mmol) | Product (mg, %)      |
|-------|-----------------------|------------------------|----------------|-----------------|----------------------|
| 1     | <b>2a</b> (137, 0.24) | <b>3</b> (52.0, 0.19)  | (54.0, 0.24)   | (4.2, 0.048)    | <b>4a</b> (127, 95%) |
| 2     | <b>2b</b> (70, 0.12)  | <b>3</b> (24.6, 0.09)  | (33.2, 0.14)   | (2.1, 0.024)    | <b>4b</b> (47, 70%)  |
| 3     | <b>5</b> (120, 0.24)  | <b>3</b> (52.0, 0.19)  | (54.0, 0.24)   | (4.2, 0.048)    | <b>16</b> (96, 80%)  |
| 4     | <b>5</b> (120, 0.24)  | <b>11</b> (58.0, 0.2)  | (54.0, 0.24)   | (4.2, 0.048)    | <b>17</b> (72, 83%)  |
| 5     | <b>5</b> (137, 0.27)  | <b>13</b> (50, 0.22)   | (61.0, 0.27)   | (4.8, 0.055)    | <b>18</b> (110, 84%) |
| 6     | <b>6</b> (133, 0.21)  | <b>3</b> (44, 0.16)    | (59.2, 0.26)   | (3.9, 0.043)    | <b>19</b> (80, 79%)  |
| 7     | <b>6'</b> (73, 0.12)  | <b>3</b> (24.2, 0.09)  | (32.5, 0.14)   | (2.1, 0.024)    | <b>19'</b> (54, 79%) |
| 8     | <b>6</b> (135, 0.22)  | <b>12</b> (43, 0.17)   | (60.3, 0.26)   | (3.9, 0.044)    | <b>20</b> (73, 63%)  |
| 7     | <b>6</b> (142, 0.23)  | <b>14</b> (45, 0.18)   | (63.2, 0.28)   | (4.1, 0.046)    | <b>21</b> (79, 60%)  |
| 9     | <b>2a</b> (137, 0.24) | <b>10</b> (93, 0.2)    | (54, 0.24)     | (4.2, 0.048)    | <b>22</b> (90, 50%)  |
| 10    | <b>2a</b> (137, 0.24) | <b>11</b> (58, 0.2)    | (54, 0.24)     | (4.2, 0.048)    | <b>23</b> (80, 54%)  |
| 11    | <b>7</b> (148, 0.24)  | <b>3</b> (52, 0.2)     | (54, 0.24)     | (4.2, 0.048)    | <b>24</b> (108, 70%) |
| 12    | <b>7'</b> (63, 0.10)  | <b>3</b> (20, 0.07)    | (27, 0.12)     | (1.7, 0.02)     | <b>24'</b> (52, 90%) |
| 13    | <b>7</b> (148, 0.24)  | <b>11</b> (58, 0.2)    | (54, 0.24)     | (4.2, 0.048)    | <b>25</b> (96, 64%)  |
| 14    | <b>8</b> (101, 0.17)  | <b>15</b> (59, 0.15)   | (37, 0.17)     | (3, 0.033)      | <b>26</b> (105, 79%) |
| 15    | <b>8'</b> (80, 0.13)  | <b>15</b> (38.9, 0.10) | (35, 0.15)     | (2.3, 0.026)    | <b>26'</b> (82, 94%) |
| 16    | <b>9</b> (60, 0.12)   | <b>3</b> (26, 0.10)    | (27, 0.12)     | (1.7, 0.02)     | <b>27</b> (36, 60%)  |
| 17    | <b>9</b> (120, 0.25)  | <b>11</b> (54, 0.18)   | (56, 0.25)     | (4.4, 0.05)     | <b>28</b> (63, 55%)  |

## 2.2 Preparation of 2-deoxyglycosyl donors 2 and 5-9

### 2.2.1 *p*-Tolyl 3-*O*-Benzoyl-4-*O*-benzyl-6-*O*-picoloyl-2-deoxy-1-thio- $\beta$ -D-allopyranoside (2a)

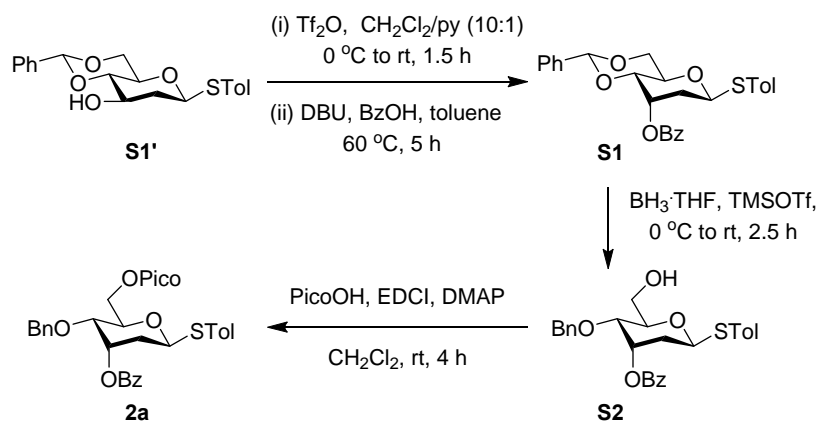

**Compound S1:** To the solution of S1'<sup>1</sup> (2 g, 5.59 mmol) in CH<sub>2</sub>Cl<sub>2</sub>/pyridine (10/1, v/v) (20 mL), triflic anhydride (1.37 mL, 8.38 mmol) was added in a dropwise fashion at 0 °C for 30 min. After completion of addition, the mixture was warmed to room temperature and stirred for 1 hour. Then, the solution was diluted with CH<sub>2</sub>Cl<sub>2</sub> (150 mL), washed with water (100 mL), saturated ammonium chloride (NH<sub>4</sub>Cl) solution (100 mL) and brine solution (100 mL). The organic layer was dried over MgSO<sub>4</sub> and concentrated under reduced pressure. To the solution of crude triflate in toluene (20 mL) was added 1,8-diazabicyclo[5.4.0]undec-7-ene (DBU) (2.51 mL, 16.76 mmol) and benzoic acid (4.09 g, 33.51 mmol) and stirred at room temperature for 0.5 hour. The solution was heated to 60 °C and stirred for 5 hours. After completion of the reaction, the solution was cooled to room temperature and diluted with EtOAc (150 mL), washed with saturated NaHCO<sub>3</sub> solution (100 mL), saturated NH<sub>4</sub>Cl solution (100 mL), water (100 mL) brine and dried (MgSO<sub>4</sub>). The crude product S1 was used for further step without purification. **Compounds S2 and 2a:** To the solution of S1 (1.3 g, 2.81 mmol) in BH<sub>3</sub>·THF (16.86 mL, 1 M BH<sub>3</sub> in THF) was added trimethylsilyl trifluoromethanesulfonate (TMSOTf) (101  $\mu$ L, 0.56 mmol) at 0 °C. The solution was stirred at room temperature for 2.5 hours, quenched with triethylamine (Et<sub>3</sub>N) (3

mL) followed by careful addition of methanol (MeOH) until the evolution of H<sub>2</sub> ceased. The reaction mixture was concentrated and purified by flash chromatography with 1:3 of EtOAc in hexane. To the solution of obtained compound **S2** (0.3 g, 0.64 mmol) in CH<sub>2</sub>Cl<sub>2</sub> (4 mL) was added 1-ethyl-3-(3-dimethylaminopropyl)-carbodiimide (EDCI) (0.18 g, 0.96 mmol), dimethylaminopyridine (DMAP) (0.02 g, 0.13 mmol) and picolinic acid (0.12 g, 0.96 mmol) at room temperature. The resulting mixture was stirred for 4 hours at room temperature. After completion of the reaction, the thick solution was diluted with CH<sub>2</sub>Cl<sub>2</sub> (50 mL), washed with brine (25.0 mL × 2), dried over Na<sub>2</sub>SO<sub>4</sub>. The crude product was purified by silica-gel column chromatography (2:1 to 1:1 EtOAc in hexane) to provide **2a** as yellow syrup (0.36 g, 98%).

Analytical data for **2a**: R<sub>f</sub> = 0.4 (EtOAc/hexane, 1/1, v/v); [α]<sub>D</sub><sup>35</sup> +38.1 (c 1.5, CHCl<sub>3</sub>); δ<sub>H</sub> (500 MHz, CDCl<sub>3</sub>, Me<sub>4</sub>Si): 8.82–8.81 (m, 1H), 8.07 (dd, *J* = 1.5, *J* = 8.5 Hz, 2H), 8.02 – 8.01 (m, 1H), 7.84 – 7.80 (m, 1H), 7.60–7.56 (m, 1H), 7.52 – 7.50 (m, 1H), 7.47 – 7.44 (m, 2H), 7.40 (d, *J* = 8 Hz, 2H), 7.24 – 7.19 (m, 4H), 7.17 – 7.14 (m, 1H), 6.92 (d, *J* = 7.5 Hz, 2H), 5.88 (ddd, *J* = 2.5, *J* = 3, *J* = 3.5 Hz, 1H), 5.15 (dd, *J* = 2, *J* = 12 Hz, 1H), 4.70 (d, *J* = 11.5 Hz, 1H), 4.69 (dd, *J* = 2.5, *J* = 11.5 Hz, 1H), 4.63 (dd, *J* = 6.5, *J* = 11.5 Hz, 1H), 4.43 (d, *J* = 11 Hz, 1H), 4.33 (ddd, *J* = 2.5, *J* = 6.5, *J* = 9.5 Hz, 1H), 3.63 (dd, *J* = 3, *J* = 9.5 Hz, 1H), 2.36 (ddd, *J* = 2, *J* = 3.5, *J* = 14.5, 1H), 2.25 (s, 1H), 2.06 (ddd, *J* = 2.5, *J* = 12, *J* = 14.5, 1H); δ<sub>C</sub> (125 MHz, CDCl<sub>3</sub>): 165.8, 164.9, 150.1, 148.2, 137.9, 137.2, 137.0, 133.5, 131.0, 130.0, 129.7, 128.7, 128.6, 128.4, 128.1, 127.0, 125.5, 80.5, 74.2, 73.2, 71.1, 66.5, 65.4, 36.1, 21.3; HRMS (ESI): calcd for C<sub>33</sub>H<sub>31</sub>NNaO<sub>6</sub>S<sup>+</sup> [M + Na]<sup>+</sup> 592.1764, found *m/z* 592.1752.

### 2.2.2 *p*-Tolyl 3,6-di-*O*-Benzoyl-4-*O*-benzyl-2-deoxy-1-thio-β-D-allopyranoside (**2b**)

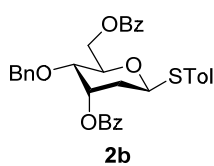

**2b** was prepared by using standard procedures. Analytical data for **2b**: R<sub>f</sub> = 0.4 (EtOAc/hexane, 1/4, v/v); δ<sub>H</sub> (400 MHz, CDCl<sub>3</sub>, Me<sub>4</sub>Si): 8.07–8.05 (m, 2H), 8.02 – 7.99 (m, 2H), 7.62 – 7.55 (m, 2H), 7.49 – 7.40 (m, 6H),

7.24 – 7.14 (m, 5H), 6.94 – 6.92 (m, 2H), 5.89 – 5.87 (dd,  $J = 6$  Hz,  $J = 2.8$  Hz, 1H), 5.16 – 5.13 (dd,  $J = 12$  Hz,  $J = 2$  Hz, 1H), 4.71 – 4.67 (dd,  $J = 11.6$  Hz,  $J = 2.4$  Hz, 2H), 4.50 – 4.45 (dd,  $J = 11.6$  Hz,  $J = 6$  Hz, 1H), 4.43 – 4.40 (d,  $J = 11.6$  Hz, 1H), 4.27 – 4.23 (ddd,  $J = 9.6$  Hz,  $J = 6$  Hz,  $J = 2.4$  Hz, 1H), 3.63 – 3.59 (dd,  $J = 10$  Hz,  $J = 3.2$  Hz, 1H), 2.38 – 2.33 (ddd,  $J = 14.8$  Hz,  $J = 3.6$  Hz,  $J = 2.4$  Hz, 1H), 2.27 (s, 3H), 2.06 – 1.99 (m, 1H);  $\delta_C$  (**100 MHz, CDCl<sub>3</sub>**): 166.2, 165.6, 137.8, 136.9, 133.2, 132.9, 129.8, 129.7, 129.5, 129.1, 128.5, 128.4, 128.3, 128.2, 127.9, 80.1, 74.1, 72.5, 70.9, 66.3, 64.2, 35.9, 21.1.

### 2.2.3 *p*-Tolyl 3-*O*-(2-Naphthylmethyl)-4-*O*-picoloyl-2,6-dideoxy-1-thio- $\beta$ -D-galactopyranoside (**5**)

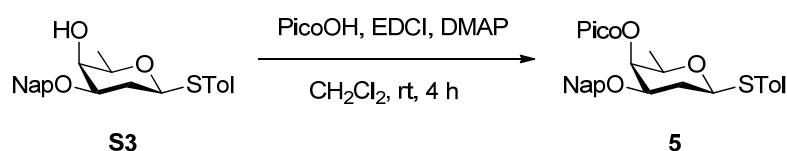

To the solution of **S3**<sup>1</sup> (0.82 g, 2.16 mmol) in CH<sub>2</sub>Cl<sub>2</sub> (15 mL) were added 1-ethyl-3-(3-dimethylaminopropyl)-carbodiimide (EDCI) (0.83 g, 4.32 mmol), dimethylaminopyridine (DMAP) (0.05 g, 0.43 mmol) and picolinic acid (0.53 g, 4.32 mmol) respectively at room temperature. The reaction mixture was stirred for 4 hours at room temperature, diluted with CH<sub>2</sub>Cl<sub>2</sub> (150 mL). The organic layer was washed with the water (50 mL), brine (50 mL) and concentrated under reduced pressure. The obtained crude product was purified by silica-gel column chromatography (elution: EtOAc/Hexane, 1/1) to give **5** (0.90 g, 83%) as white slimy amorphous.

Analytical data for **5**:  $R_f = 0.2$  (EtOAc/hexane, 1/1, v/v);  $[\alpha]_D^{35} +40.0$  (c 3.3, CHCl<sub>3</sub>);  $\delta_H$  (**600 MHz, CDCl<sub>3</sub>, Me<sub>4</sub>Si**): 8.79 – 8.79 (m, 1H), 8.01 (d,  $J = 7.8$  Hz, 1H), 7.77 – 7.74 (m, 4H), 7.71 (s, 1H), 7.47-7.38 (m, 6H), 7.11 (d,  $J = 7.8$  Hz, 2H), 5.59 (d,  $J = 2.4$  Hz, 1H), 4.85 (d,  $J = 12$  Hz, 1H), 4.68 (dd,  $J = 3$ ,  $J = 10.8$  Hz, 1H), 4.64 (d,  $J = 12$  Hz, 1H), 3.73 (ddd,  $J = 3$ ,

$J = 5.4$ ,  $J = 11.4$  Hz, 1H), 3.68 (q,  $J = 6.6$  Hz, 1H), 2.33 (s, 3H), 2.15 – 2.07 (m, 2H), 1.30 (d,  $J = 6.6$  Hz, 3H);  $\delta_C$  (150 MHz,  $CDCl_3$ ): 164.4, 150.3, 147.7, 137.8, 137.0, 135.2, 133.2, 133.2, 133.1, 129.6, 129.4, 128.4, 127.9, 127.7, 127.0, 126.7, 126.2, 126.0, 125.8, 125.6, 82.4, 75.0, 73.5, 70.4, 69.3, 33.2, 21.3, 17.4; **HRMS (ESI)**: calcd for  $C_{30}H_{29}NNaO_4S^+$  [ $M + Na$ ] $^+$  522.1710, found  $m/z$  522.1715.

#### 2.2.4 *p*-Tolyl 4-*O*-Benzyl-3-*O*-(2-naphthylmethyl)-6-*O*-picoloyl-2-deoxy-1-thio- $\alpha$ -D-galactopyranoside (**6**)

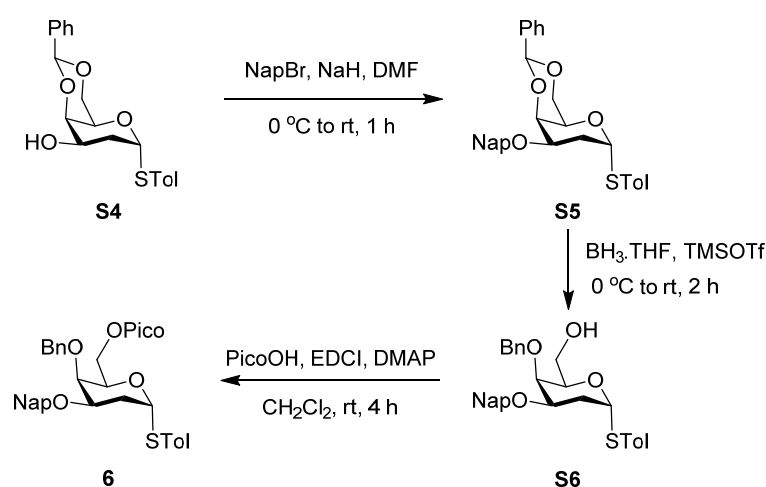

**Compound S5:** To the stirred solution of **S4** (1.29 g, 3.59 mmol) in *N,N*-dimethylformamide (DMF) (10 mL), were added 2-bromonaphthalene (1.49 g, 7.19 mmol) followed by sodium hydride (NaH) (0.17 mg, 7.19 mmol) in portion wise at 0 °C and warmed to room temperature. After completion of the reaction (10 h), quenched with saturated  $NH_4Cl$  solution (20 mL) and extracted with EtOAc (75 mL  $\times$  2) and dried ( $Na_2SO_4$ ). The crude product was purified by silica-gel column chromatography (2:3 to 1:1 EtOAc/hexane) to give **S5** (1.67 g, 93.3%) as a white solid. **Compound S6:** The compound **S5** (1.0 g, 2.00 mmol) was dissolved in  $BH_3 \cdot THF$  (12.0 mL, 1.0 M  $BH_3$  in THF) at 0 °C and added TMSOTf (72  $\mu$ L, 0.40 mmol) at same temperature. The resulting mixture was warmed to room temperature and stirred for 1 hour. The reaction was slowly quenched with  $Et_3N$  (2.0



mL) and MeOH (10.0 mL). Concentrated the solution under reduced pressure and purified by silica-gel column chromatography (2:3 to 1:1 EtOAc/hexane) to give **S6** (0.78 g, 78.3%) as white solid. **Compound 6a**: To the solution of **S6** (0.65 g, 1.29 mmol) in CH<sub>2</sub>Cl<sub>2</sub> (15 mL), were added 1-ethyl-3-(3-dimethylaminopropyl)carbodiimide (EDCI) (0.40 g, 2.58 mmol), dimethylaminopyridine (DMAP) (0.03 g, 0.25 mmol) and picolinic acid (0.31 g, 2.58 mmol) respectively at room temperature. The reaction mixture was stirred for 4 hours at room temperature, diluted with CH<sub>2</sub>Cl<sub>2</sub> (100 mL). The organic layer was washed with the water (50 mL), brine (50 mL) and concentrated. The obtained crude product was purified by silica-gel column chromatography (2:3 to 1:1 EtOAc/hexane) to give **6** (0.65 g, 83%) as thick gum.

Analytical data for **6**:  $R_f = 0.6$  (EtOAc/hexane, 2/3, v/v);  $[\alpha]_D^{20} +188.5$  (c 2.1, CHCl<sub>3</sub>);  $\delta_H$  (400 MHz, CDCl<sub>3</sub>, Me<sub>4</sub>Si): 8.78 – 8.76 (dt,  $J = 4.8$  Hz,  $J = 0.8$  Hz, 1H), 7.94 – 7.92 (d,  $J = 6.8$  Hz, 1H), 7.88 – 7.83 (m, 4H), 7.76 – 7.72 (td,  $J = 7.6$  Hz,  $J = 1.6$  Hz, 1H), 7.53 – 7.21 (m, 10H), 6.96 – 6.88 (d,  $J = 8.0$  Hz, 2H), 5.74 – 5.73 (d,  $J = 5.6$  Hz, 1H), 5.05 – 5.02 (d,  $J = 11.6$  Hz, 1H), 4.85 – 4.78 (dd,  $J = 17.2$  Hz,  $J = 12.0$  Hz, 2H), 4.76 – 4.73 (d,  $J = 15.6$  Hz, 1H), 4.69 – 4.66 (dd,  $J = 6.4$  Hz,  $J = 5.6$  Hz, 1H), 4.62 – 4.57 (m, 1H), 4.51 – 4.47 (m, 1H), 4.07 (ddd,  $J = 12.0$  Hz,  $J = 4.0$  Hz,  $J = 2.4$  Hz, 1H), 4.06 (s, 1H), 2.73 – 2.66 (td,  $J = 12.8$  Hz,  $J = 5.6$  Hz, 1H), 2.27 – 2.24 (dd,  $J = 13.2$  Hz,  $J = 4.0$  Hz, 1H), 2.20 (s, 3H);  $\delta_C$  (100 MHz, CDCl<sub>3</sub>): 164.5, 149.7, 147.6, 138.2, 136.8, 136.6, 135.5, 133.1, 132.8, 131.7, 130.6, 129.4, 128.2, 128.1, 127.7, 127.6, 127.5, 126.6, 126.1, 126.0, 125.8, 125.3, 125.1, 84.2, 75.3, 74.1, 72.9, 70.7, 69.6, 64.9, 31.5, 20.9.

### 2.2.5 *p*-Tolyl 4-*O*-Benzyl-6-*O*-benzoyl-3-*O*-(2-naphthylmethyl)-2-deoxy-1-thio- $\alpha$ -D-galactopyranoside (**6'**)

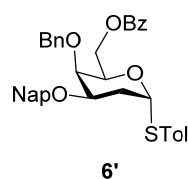

**6'** was prepared by using standard procedures. Analytical data for **6'**:  $R_f = 0.5$  (EtOAc/hexane, 1/4, v/v);  $\delta_H$  (400 MHz,  $CDCl_3$ ,  $Me_4Si$ ): 8.16 – 8.13 (m, 1H), 7.92 – 7.90 (m, 2H), 7.86 – 7.81 (m, 4H), 7.56 – 7.44 (m, 5H), 7.40 – 7.36 (m, 4H), 7.31 – 7.27 (m, 3H), 6.89 – 6.87 (d,  $J = 7.6$  Hz, 2H), 5.73 – 5.71 (d,  $J = 5.2$  Hz, 1H), 5.03 – 5.00 (d,  $J = 11.6$  Hz, 1H), 4.84 – 4.71 (dd,  $J = 20.4$  Hz,  $J = 12.0$  Hz, 2H), 4.74 – 4.71 (d,  $J = 11.6$  Hz, 1H), 4.59 – 4.56 (dd,  $J = 7.6$  Hz,  $J = 2.8$  Hz, 1H), 4.51 – 4.46 (dd,  $J = 11.2$  Hz,  $J = 7.6$  Hz, 1H), 4.39 – 4.35 (dd,  $J = 11.2$  Hz,  $J = 4.4$  Hz, 1H), 4.04 – 3.96 (ddd,  $J = 12.4$  Hz,  $J = 4.4$  Hz,  $J = 2.4$  Hz, 1H), 3.96 (s, 1H), 2.71 – 2.63 (td,  $J = 12.0$  Hz,  $J = 6$  Hz, 1H), 2.26 – 2.22 (dd,  $J = 13.2$  Hz,  $J = 4.4$  Hz, 1H), 2.21 (s, 3H);  $\delta_C$  (100 MHz,  $CDCl_3$ ): 166.1, 138.2, 137.0, 135.5, 134.4, 132.8, 131.6, 130.5, 129.6, 129.5, 128.8, 128.3, 128.1, 127.8, 127.6, 126.2, 126.1, 125.9, 125.3, 84.4, 75.4, 74.1, 73.2, 70.7, 69.8, 64.4, 31.5, 21.0.

## 2.2.6 *p*-Tolyl 4-*O*-(*tert*-Butyldimethylsilyl)-3-*O*-(2-naphthylmethyl)-6-*O*-picoloyl-2-deoxy-1-thio- $\alpha$ -D-glucopyranoside (**7**)

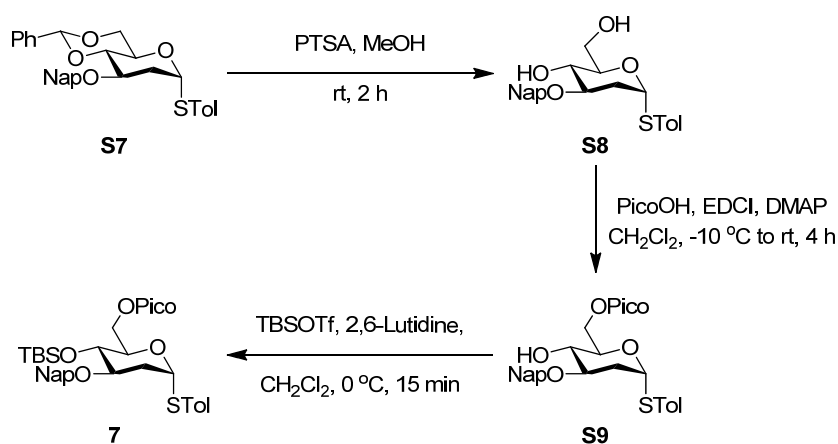

**Compound S8:** The compound **S7**<sup>1</sup> (1.39 g, 2.80 mmol) was dissolved in MeOH (20 mL) and *p*-toluenesulfonic acid (PTSA) (0.96 g, 0.56 mmol) was added at room temperature. The mixture was stirred for 2 hours, and then neutralized with  $Et_3N$ . The crude product was purified by silica-gel column chromatography (1:1 EtOAc/hexane) to give **S8** (0.94 g, 81.7 %) as white amorphous solid. **Compound S9:** To the solution of **S8** (0.40 g, 1.09 mmol) in

CH<sub>2</sub>Cl<sub>2</sub> (20 mL), were added 1-ethyl-3-(3-dimethylaminopropyl) carbodiimide (EDCI) (0.42 g, 2.18 mmol), dimethylaminopyridine (DMAP) (0.01 g, 0.11 mmol) and picolinic acid (0.14 g, 1.14mmol) respectively at -10 °C. The reaction mixture was stirred for 4 hours at room temperature, diluted with CH<sub>2</sub>Cl<sub>2</sub> (100 mL). The organic layer was washed with brine (50 mL) and concentrated. The crude product was purified by silica-gel column chromatography (2:3 to 2:1 EtOAc/hexane) to give **S9** (0.31 g, 62%) as a white powder. **Compound 7**: To the solution of **S9** (0.30, 0.58 mmol) in CH<sub>2</sub>Cl<sub>2</sub> (10 mL), was added 2,6-lutidine (0.16 mL, 1.36 mmol) and TBSOTf (0.25 mL, 1.09 mmol) at 0 °C. The stirring was continued for another 30 min, quenched with saturated NH<sub>4</sub>Cl solution (5.0 mL). The aqueous layer was extracted with CH<sub>2</sub>Cl<sub>2</sub> (25.0 mL × 2), combined organic layers were washed with 20% aqueous CuSO<sub>4</sub> solution (25.0 mL × 2) and brine solution (25.0 mL). The organic layer was concentrated and purified by silica-gel column chromatography (1:3 EtOAc/Hexane) to obtain **7** (0.31 g, 87%) as colorless syrup.

Analytical data for **7**: R<sub>f</sub>=0.3 (EtOAc/hexane, 1/2, v/v); [α]<sub>D</sub><sup>25</sup> +120.3 (c 3.6, CHCl<sub>3</sub>); δ<sub>H</sub> (500 MHz, CDCl<sub>3</sub>, Me<sub>4</sub>Si): 8.71 – 8.70 (m, 1H), 7.95 (d, *J* = 7.5 Hz, 1H), 7.77 – 7.68 (m, 5H), 7.44 – 7.36 (m, 4H), 7.26 (d, *J* = 8.0 Hz, 2H), 6.81 (d, *J* = 8.0 Hz, 2H), 5.50 (d, *J* = 5 Hz, 1H), 4.68 – 4.64 (m, 3H), 4.56 (dd, *J* = 6.5 Hz, *J* = 11.5 Hz, 1H), 4.49 (ddd, *J* = 2 Hz, *J* = 6.5 Hz, *J* = 9 Hz, 1H), 3.78 (ddd, *J* = 5 Hz, *J* = 8.5 Hz, *J* = 13 Hz, 1H), 3.68 (d, *J* = 9 Hz, 1H), 2.41 (ddd, *J* = 1 Hz, *J* = 5 Hz, *J* = 13 Hz, 1H), 2.15 (s, 3H), 2.01 (ddd, *J* = 5.5 Hz, *J* = 11.5 Hz, *J* = 13.5 Hz, 1H), 0.08 (s, 9H), 0.017 (s, 3H), 0.015 (s, 3H); δ<sub>C</sub> (125 MHz, CDCl<sub>3</sub>): 164.9, 150.0, 148.1, 137.2, 136.8, 135.9, 133.4, 133.0, 132.0, 130.9, 129.7, 128.2, 128.0, 127.8, 126.8, 126.5, 126.2, 126.0, 125.2, 84.2, 78.1, 72.2, 71.7, 71.5, 65.2, 35.7, 26.1, 21.2, 18.3, -3.6, -4.9; HRMS (ESI): calcd for C<sub>36</sub>H<sub>43</sub>NNaO<sub>5</sub>SSi<sup>+</sup> [M + Na]<sup>+</sup> 652.2523, found *m/z* 652.2506.

## 2.2.7 *p*-Tolyl 6-*O*-Benzoyl-4-*O*-(*tert*-butyldimethylsilyl)-3-*O*-(2-naphthylmethyl)-

## 2-deoxy-1-thio-D-glucopyranoside (7')

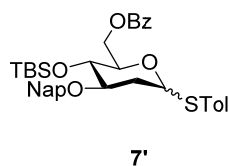

7' was prepared from **S8** using similar procedures as for **7**. Crude NMR  $^1\text{H}$  and  $^{13}\text{C}$  NMR spectra of 7' were given in pp 69-70.

### 2.2.8 *p*-Tolyl 4-*O*-Benzyl-3-*O*-(2-naphthylmethyl)-6-*O*-picoloyl-2-deoxy-1-thio- $\beta$ -D-glucopyranoside (**8**)

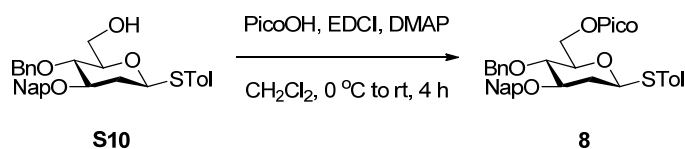

To the solution of **S10**<sup>1</sup> (0.50 g, 0.99 mmol) in CH<sub>2</sub>Cl<sub>2</sub> (10 mL), 1-ethyl-3-(3-dimethylaminopropyl) carbodiimide (EDCI) (0.30 g, 1.98 mmol), dimethylaminopyridine (DMAP) (23.2 mg, 0.19 mmol) and picolinic acid (0.24 g, 1.98 mmol) were added at 0 °C. The resulting mixture was stirred for 4 h at room temperature and diluted CH<sub>2</sub>Cl<sub>2</sub> (100 mL). The solution was washed with water (50 mL), brine (50 mL), and concentrated. The residue was purified by silica-gel column chromatography (1:1 EtOAc/Hexane) to give **8** (0.43 g, 72%) as a gummy substance.

Analytical data for **8**:  $R_f$  = 0.3 (EtOAc/hexane, 1/1, v/v);  $[\alpha]_D^{35}$  -14.3 (c 0.3, CHCl<sub>3</sub>);  $\delta_{\text{H}}$  (500 MHz, CDCl<sub>3</sub>, Me<sub>4</sub>Si): 8.80 – 8.79 (m, 1H, ArH), 8.03 (d,  $J$  = 8 Hz, 1H), 7.84 – 7.76 (m, 5H), 7.51 – 7.45 (m, 4H), 7.36 (d,  $J$  = 8 Hz, 2H), 7.31 – 7.23 (m, 5H), 6.92 (d,  $J$  = 8 Hz, 2H), 4.98 (d,  $J$  = 11 Hz, 1H), 4.87 (d,  $J$  = 11.5 Hz, 1H), 4.77 (d,  $J$  = 11.5 Hz, 1H), 4.69 (dd,  $J$  = 2 Hz,  $J$  = 12 Hz, 1H), 4.68 (d,  $J$  = 11 Hz, 1H), 4.67 (dd,  $J$  = 2.5 Hz,  $J$  = 12 Hz, 1H), 4.60 (dd,  $J$  = 6 Hz,  $J$  = 12 Hz, 1H), 3.80 (ddd,  $J$  = 5 Hz,  $J$  = 8.5 Hz,  $J$  = 11 Hz, 1H), 3.69 (ddd,  $J$  = 2.5 Hz,  $J$  = 6 Hz,  $J$  = 8.5 Hz, 1H), 3.53 (d,  $J$  = 8.5 Hz, 1H), 2.51 (ddd,  $J$  = 1.5 Hz,  $J$  = 5 Hz,  $J$  = 12.5

Hz, 1H), 2.25 (s, 1H), 1.83 (d,  $J = 12$  Hz, 1H);  $\delta_C$  (125 MHz,  $CDCl_3$ ): 164.8, 150.2, 148.2, 138.1, 137.8, 137.0, 135.6, 133.5, 133.3, 132.8, 129.8, 129.7, 128.7, 128.5, 128.3, 128.1, 128.1, 127.9, 127.0, 126.8, 126.4, 126.2, 126.0, 125.5, 82.6, 80.9, 77.9, 77.3, 75.3, 72.0, 65.1, 37.0, 21.3; **HRMS (ESI)**: calcd for  $C_{37}H_{35}NNaO_5S^+$   $[M + Na]^+$  628.2128, found  $m/z$  628.2149.

### 2.2.9 *p*-Tolyl 6-*O*-Benzyl-3-*O*-(2-naphthylmethyl)-4-*O*-picoloyl-2-deoxy-1-thio- $\alpha$ -D-glucopyranoside (**8'**)

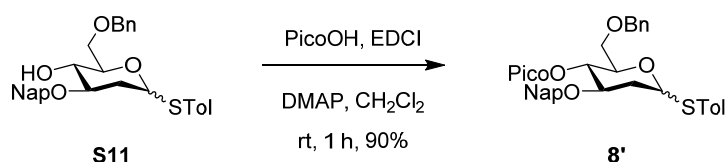

To the solution of **S11**<sup>1</sup> (0.3 g, 0.59 mmol) in  $CH_2Cl_2$  (12 mL), 1-ethyl-3-(3-dimethylaminopropyl) carbodiimide (EDCI) (0.23 g, 1.19 mmol), dimethylaminopyridine (DMAP) (14.6 mg, 0.12 mmol) and picolinic acid (88.5 mg, 0.72 mmol) were added at 0 °C. The resulting mixture was stirred for 1 h at room temperature and diluted  $CH_2Cl_2$  (100 mL). The solution was washed with brine (50 mL  $\times$  2) and concentrated. The residue was purified by silica-gel column chromatography (2:3 EtOAc/Hexane) to give **8'** (0.32 g, 90%) as a gum. Crude  $^1H$  and  $^{13}C$  NMR spectra of **8'** were given in pp 75-76.

### 2.2.10 *p*-Tolyl 4-*O*-Benzoyl-6-*O*-picoloyl-2,3-dideoxy-1-thio- $\alpha$ -D-glucopyranoside (**9**)

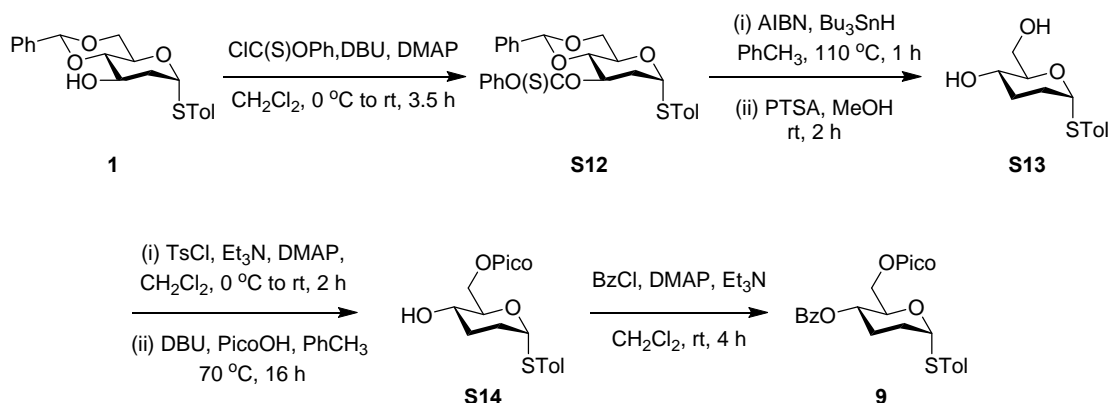

**Compound S12:** To the solution of **1**<sup>1</sup> (1.0 g, 2.79 mmol) in CH<sub>2</sub>Cl<sub>2</sub> (15 mL), DBU (1.25 mL, 8.37 mmol), DMAP (1.02 g, 8.37 mmol) and *O*-phenyl chlorothionoformate (0.77 mL, 5.58 mmol) were added at 0 °C. The reaction mixture was gradually warmed to room temperature and stirred for 3.5 h. The solution was diluted with EtOAc (100 mL), washed with saturated NH<sub>4</sub>Cl solution (50 mL), water (50 mL), brine (50 mL), and dried over MgSO<sub>4</sub>. The crude residue was purified by silica-gel column chromatography (1:5 EtOAc/Hexane) to give **S12** (1.01 g, 70 %) as white glassy solid. **Compound S13:** To the solution of **S12** (1.01g, 1.99 mmol) in toluene (20 mL), was added tributyltin hydride (Bu<sub>3</sub>SnH) (1.07 mL, 3.98 mmol) and azobisisobutyronitrile (AIBN) (0.16 g, 1.00 mmol) at room temperature. The solution was degassed for three times under *vacuo* and N<sub>2</sub>. The resulting solution was refluxed for 1 hour at 110 °C. After completion of the reaction, the solution was concentrated under reduced pressure. The obtained crude product was dissolved in MeOH (15 mL) and added *p*-toluenesulfonic acid (0.76 g, 3.98 mmol) at room temperature. The mixture was stirred for 1 hour, then neutralized with Et<sub>3</sub>N and concentrated under *vacuo*. The silica-gel purification (2:1 EtOAc/hexane) of crude residue provided **S13** (0.36 g, 71%) as light yellow solid. **Compound S14:** To the solution of **S13** (0.10 g, 0.4 mmol), Et<sub>3</sub>N (0.17 mL, 1.20 mmol) and DMAP (0.01 g, 0.08 mmol) in CH<sub>2</sub>Cl<sub>2</sub> (15 mL), was added tosyl chloride (TsCl) (0.10 g, 0.52 mmol) at 0 °C. The reaction mixture was stirred for 2 hours at room temperature. After completion of the reaction, the solution was washed with saturated NH<sub>4</sub>Cl solution (10 mL), brine (10 mL) and dried (over MgSO<sub>4</sub>). The crude tosylated derivative was dissolved in toluene (10 mL) and added 1,8-diazabicycloundec-7-ene (DBU) (0.18 mL, 1.20 mmol) and picolinic acid (0.20 g, 1.60 mmol) at room temperature. The resulting solution was stirred for overnight at 70 °C. After being cooled down to room temperature, the reaction mixture was diluted with EtOAc, washed with saturated NaHCO<sub>3</sub> solution (10 mL), water (10 mL), brine (10 mL) and dried (over MgSO<sub>4</sub>). The solution of crude product **S14** in CH<sub>2</sub>Cl<sub>2</sub> (5 mL), was added DMAP (0.01 g, 0.08 mmol), Et<sub>3</sub>N (0.17 mL, 1.2 mmol) followed by BzCl (0.07 mL,

0.60 mmol) under nitrogen at 0 °C. The solution was stirred at room temperature for 4 hours. After completion of the reaction, the solution was diluted with EtOAc (25 mL), washed with saturated NH<sub>4</sub>Cl solution (10 mL), brine (10 mL) and dried over MgSO<sub>4</sub>. The crude residue was purified by silica-gel column chromatography (2:1 EtOAc/hexane) to give **9** (0.062 g, 34%) as white solid.

Analytical data for **9**:  $R_f$  = 0.5 (EtOAc hexane, 1/1, v/v);  $[\alpha]_D^{35}$  +302.0 (c 1.0, CHCl<sub>3</sub>);  $\delta_H$  (500 MHz, CDCl<sub>3</sub>, Me<sub>4</sub>Si): 8.76 – 8.74 (m, 1H), 8.06 (d,  $J$  = 7 Hz, 2H), 7.99 (d,  $J$  = 7.5 Hz, 1H), 7.73 – 7.75 (m, 1H), 7.58 – 7.55 (m, 1H), 7.47 – 7.42 (m, 3H), 7.38 (d,  $J$  = 8 Hz, 2H), 6.90 (d,  $J$  = 8.5 Hz, 2H), 5.56 (d,  $J$  = 5 Hz, 1H), 5.08 (dd,  $J$  = 5 Hz,  $J$  = 10.5 Hz, 1H), 4.90 (ddd,  $J$  = 3.5 Hz,  $J$  = 5.5 Hz,  $J$  = 10 Hz, 1H), 4.60 – 4.59 (m, 2H), 2.36 – 2.27 (m, 2H), 2.23 (s, 1H), 2.16 (dd,  $J$  = 3.5 Hz, 14.5 Hz, 1H), 2.02 (dd,  $J$  = 3.5 Hz,  $J$  = 14 Hz, 1H);  $\delta_C$  (125 MHz, CDCl<sub>3</sub>): 165.8, 164.9, 150.1, 147.9, 137.3, 137.0, 133.5, 132.3, 130.7, 129.9, 129.9, 129.8, 128.6, 127.0, 125.5, 84.7, 69.4, 65.0, 29.9, 25.8, 21.3; HRMS (ESI): calcd for C<sub>26</sub>H<sub>25</sub>NNaO<sub>5</sub>S<sup>+</sup> [M + Na]<sup>+</sup> 486.1346, found  $m/z$  486.1329.

## 2.3 Preparation of glycosyl acceptor 11

### 2.3.1 Methyl 3-*O*-(2-Naphthylmethyl)-2,6-dideoxy- $\alpha$ -D-glucopyranoside (**11**)

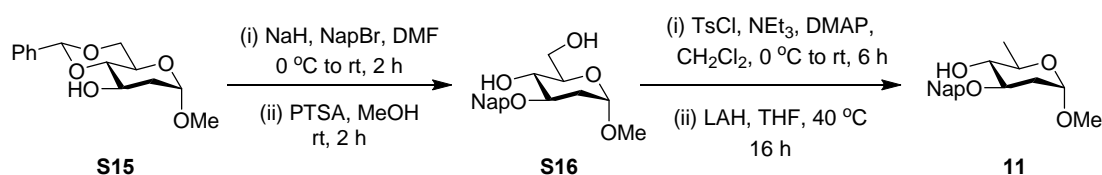

**Compound S16**: To the solution of **S15**<sup>2</sup> (2 g, 7.51 mmol) in DMF (30 mL), NaH (0.27 g, 11.26 mmol) and 2-bromonaphthalene (2.33 g, 11.26 mmol) were added slowly at 0 °C. The resulting solution was stirred for 2 hours at room temperature and quenched by slow addition of water (5 mL). Then, the suspension was diluted with CH<sub>2</sub>Cl<sub>2</sub> (150 mL), washed with water (75 mL), brine (75 mL) and dried (over MgSO<sub>4</sub>). The crude product was purified

by silica-gel column chromatography (2:3 EtOAc/hexane) to give Nap-protected acetal derivative (2.93 g, 7.21 mmol) which was dissolved in MeOH (30 mL) and added *p*-toluenesulfonic acid (0.25 mg, 1.44 mmol). The mixture was stirred for 2 hours at room temperature, diluted with EtOAc (100 mL) and washed with saturated NaHCO<sub>3</sub> solution (50 mL), brine (50 mL). The crude residue was purified by silica-gel column chromatography (1:2 EtOAc/hexane) to give **S16** (2.15 g, 89.9%) as light yellow solid. **Compound 11**: To the solution of **S16** (2 g, 6.28 mmol) in CH<sub>2</sub>Cl<sub>2</sub> (50 mL), NEt<sub>3</sub> (2.63 mL, 18.88 mmol) and DMAP (74.5 mg, 0.61 mmol) in dried CH<sub>2</sub>Cl<sub>2</sub> (10 mL) was added tosylchloride (TsCl) (1.55 g, 8.16 mmol) at 0 °C. The reaction mixture was stirred at room temperature for 6 hours, diluted with EtOAc (150 mL). The organic layer was washed with saturated NH<sub>4</sub>Cl solution (75 mL), brine (75 mL) and dried (over MgSO<sub>4</sub>). The crude tosylated product was dissolved in THF (40 mL) and added lithium aluminum hydride (LiAlH<sub>4</sub>) (0.71 g, 18.84 mmol) at 0 °C. The resulting solution was stirred at 40 °C for overnight. After completion of the reaction, the reaction mixture was slowly quenched with ice, filtered through celite and washed the celite pad with EtOAc (100 mL). The organic layer washed with water (50 mL), brine (50 mL) and dried (Na<sub>2</sub>SO<sub>4</sub>). The crude product was purified by column chromatography using silica-gel with 1:2 ethyl acetate in hexane to afford **11** (1.0 g, 70%) as white solid.

Analytical data for **11**:  $R_f = 0.4$  (EtOAc/hexane, 1/2, v/v);  $[\alpha]_D^{35} +41.1$  (c 1.80, CHCl<sub>3</sub>);  $\delta_H$  (500 MHz, CDCl<sub>3</sub>, Me<sub>4</sub>Si): 7.80 – 7.78 (m, 3H), 7.74 (s, 1H), 7.45 – 7.41 (m, 3H), 4.76 (d,  $J = 11.5$  Hz, 1H), 4.73 (d,  $J = 3$  Hz, 1H), 4.61 (d,  $J = 12$  Hz, 1H), 3.76 (ddd,  $J = 5$  Hz,  $J = 9$  Hz,  $J = 12$  Hz, 1H, H-3), 3.64 (dt,  $J = 6.5$  Hz,  $J = 15.5$  Hz, 1H), 3.28 (s, 3H), 3.24 (d,  $J = 9$  Hz, 1H), 2.75 (bs, 1H), 2.26 (dd,  $J = 5$  Hz,  $J = 13$  Hz, 1H), 1.62 (dd,  $J = 3.5$  Hz,  $J = 12.5$  Hz, 1H), 1.29 (d,  $J = 6.5$  Hz, 3H);  $\delta_C$  (125 MHz, CDCl<sub>3</sub>): 136.0, 133.4, 133.1, 128.4, 128.0, 127.8, 126.5, 126.3, 126.1, 125.8, 98.6, 77.3, 76.3, 71.3, 67.6, 54.7, 35.0, 18.0; **HRMS (ESI)**: calcd for C<sub>18</sub>H<sub>22</sub>NaO<sub>4</sub><sup>+</sup> [M + Na]<sup>+</sup> 325.1410, found  $m/z$  325.1406.



## 2.3 Preparation of 2-deoxydisaccharides

### 2.3.1 3-*O*-Benzoyl-4-*O*-benzyl-6-*O*-picoloyl-2-deoxy- $\beta$ -D-allopyranosyl-(1 $\rightarrow$ 6)-1,2:3,4-di-*O*-isopropylidene- $\alpha$ -D-galactopyranoside (**4a**)

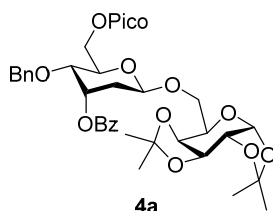

The compound **4a** was synthesized by following the general glycosylation procedure (**2.1**) with glycosyl donor **2a** (137 mg, 0.24 mmol), di-acetonide- $\alpha$ -D-galactopyranose **3** (52 mg, 0.19 mmol), NIS (54.0 mg, 0.24 mmol), TfOH (4.2  $\mu$ L, 0.048 mmol) and activated AW300 MS (1.40 g) in  $\text{CH}_2\text{Cl}_2$  (24 mL). The reaction mixture was stirred for 24 hours at  $-50^\circ\text{C}$ . The silica-gel column chromatography of crude product with mixture of EtOAc, hexane and  $\text{CH}_2\text{Cl}_2$  (1:1:1) provided **4a** (125 mg) as a colorless oil (95% yield for  $\alpha/\beta$  (1:16)).

Analytical data for **4a**:  $R_f = 0.25$  (hexane/EtOAc/ $\text{CH}_2\text{Cl}_2$ , 1/1/1, v/v);  $[\alpha]_D^{25} -6.0$  (c 12.7,  $\text{CHCl}_3$ );  $\delta_H$  (500 MHz,  $\text{CDCl}_3$ ,  $\text{Me}_4\text{Si}$ ): 8.76 – 8.75 (m, 1H), 8.09 (d,  $J = 7.5$  Hz, 2H), 7.99 (d,  $J = 7.5$  Hz, 1H), 7.78 – 7.75 (m, 1H), 7.58 – 7.55 (m, 1H), 7.46 – 7.43 (m, 3H), 7.25 – 7.10 (m, 5H), 5.93 (d,  $J = 2$  Hz, 1H), 5.49 (d,  $J = 4.5$  Hz, 1H), 5.13 (d,  $J = 9.5$  Hz, 1H), 4.73 (d,  $J = 11$  Hz, 1H), 4.66 (s, 2H), 4.52 (d,  $J = 8$  Hz, 1H), 4.45 (d,  $J = 11.5$  Hz, 1H), 4.35 – 4.33 (m, 1H), 4.26 – 4.25 (m, 1H), 4.16 (d,  $J = 7.5$  Hz, 1H), 4.05 (dd,  $J = 3$  Hz,  $J = 11$  Hz, 1H), 3.98 (d,  $J = 7$  Hz, 1H), 3.77 – 3.70 (m, 2H), 2.34 (dd,  $J = 1.5$  Hz,  $J = 12.5$  Hz, 1H), 1.95 (ddd,  $J = 1.5$  Hz,  $J = 11$  Hz,  $J = 12.5$  Hz, 1H), 1.46 (s, 3H), 1.41 (s, 3H), 1.28, (s, 3H), 1.26 (s, 3H);  $\delta_C$  (125 MHz,  $\text{CDCl}_3$ ): 165.4, 164.6, 149.7, 147.7, 137.0, 136.7, 133.0, 129.9, 129.6, 128.3, 128.2, 128.1, 127.7, 126.7, 125.1, 109.0, 108.3, 98.8, 96.1, 73.0, 71.4, 71.2, 70.9, 70.5, 70.2, 68.7, 67.6, 66.2, 65.0, 35.4, 25.8, 24.8, 24.2; HRMS (ESI): calcd for  $\text{C}_{38}\text{H}_{43}\text{NNaO}_{12}^+$  [ $\text{M} + \text{Na}$ ] $^+$  728.2677, found  $m/z$  728.2664. The  $\alpha/\beta$  ratios of **4a** obtained at 0.2 and 0.6 equiv. of TfOH and at 1.2 equiv of  $\text{Me}_2\text{S}_2\text{-Tf}_2\text{O}$  were determined by high-performance liquid

chromatography (HPLC) analysis, after deprotection of C6 picoloyl group in **4a**. Eluent: Hexane/EtOAc = 1/1; Retention time:  $\alpha$  anomer =  $\sim$ 16.0 min;  $\beta$  anomer =  $\sim$ 10.3 min (Figure S1-S3).

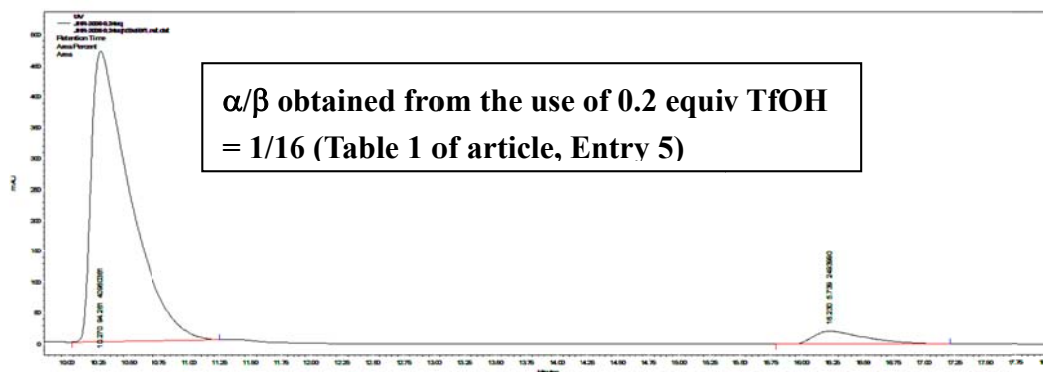

**Figure S1.** HPLC chromatogram of **4a** after Pico deprotection

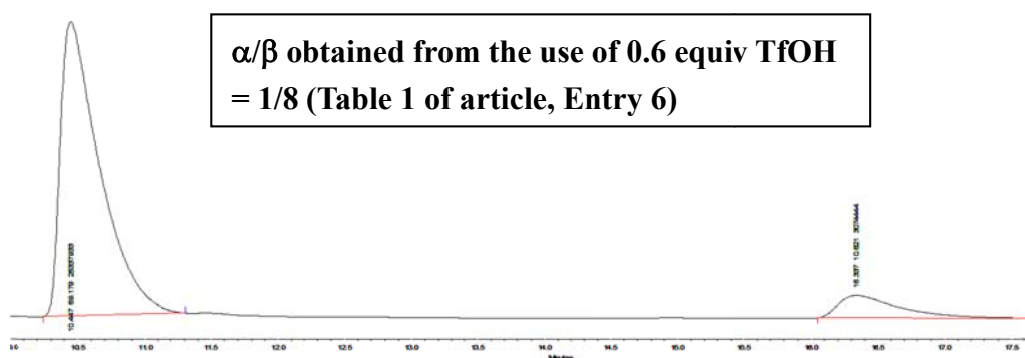

**Figure S2.** HPLC chromatogram of **4a** after Pico deprotection

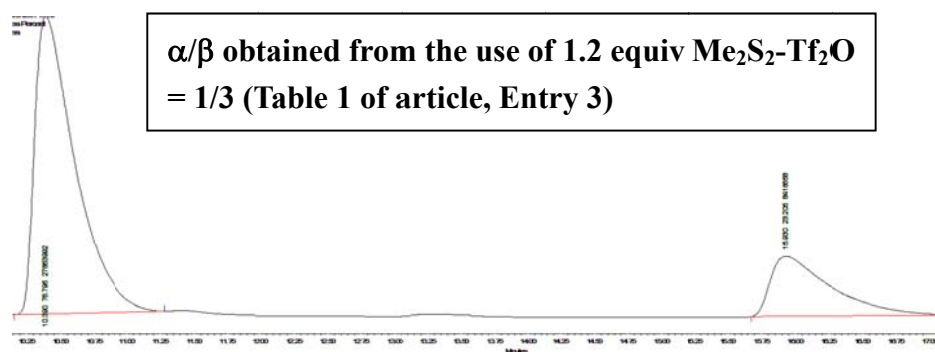

**Figure S3.** HPLC chromatogram of **4a** after Pico deprotection

### 2.3.2 3,6-di-*O*-Benzoyl-4-*O*-benzyl-2-deoxy-D-allopyranosyl-(1→6)-1,2:3,4-di-*O*-isopropylidene- $\alpha$ -D-galactopyranoside (**4b**)

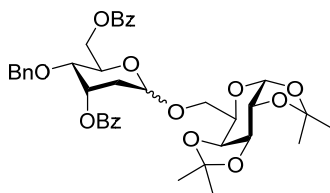

**4b**

The compound **4b** was synthesized by following the general glycosylation procedure (2.1) with glycosyl donor **2b** (70 mg, 0.12 mmol), di-acetonide- $\alpha$ -D-galactopyranose **3** (24.6 mg, 0.09 mmol), NIS (33.2 mg, 0.14 mmol), TfOH (2.1  $\mu$ L, 0.024 mmol) and activated AW300 MS (700 mg) in  $\text{CH}_2\text{Cl}_2$  (12 mL). The reaction mixture was stirred for 1 hour at  $-50^\circ\text{C}$ . The silica-gel column chromatography of crude product with mixture of EtOAc and hexane (1:4) gave **4b** (47 mg) as a thick oil (70% yield for  $\alpha/\beta$  1:1).  $\alpha:\beta$  Ratio was determined by  $^1\text{H}$  NMR spectrum (see pp 55-56).

### 2.3.3 3-*O*-(2-Naphthylmethyl)-4-*O*-picoloyl-2,6-dideoxy- $\beta$ -D-galactopyranosyl-(1→6)-1,2,3,4-di-*O*-isopropylidene- $\alpha$ -D-galactopyranoside (**16**)

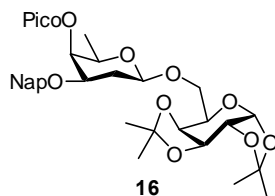

**16**

The compound **16** was synthesized by following the general glycosylation procedure (2.1) with glycosyl donor **5** (120 mg, 0.24 mmol), 1,2:3,4-di-*O*-isopropylidene- $\alpha$ -D-galactopyranose **3** (52 mg, 0.19 mmol), NIS (54.0 mg, 0.24 mmol), TfOH (4.2  $\mu$ L, 0.048 mmol) and activated AW300 MS (1.2 g) in  $\text{CH}_2\text{Cl}_2$  (24 mL). The reaction mixture was stirred for 24 hours at  $-50^\circ\text{C}$ . The crude residue was purified by silica-gel column chromatography with mixture of ethyl acetate, hexane and DCM (1:1:2) to afford **16** (88 mg) as a white slimy amorphous (80% yield for  $\alpha/\beta$  1:7).

Analytical data for **16**:  $R_f = 0.5$  (hexane/EtOAc/CH<sub>2</sub>Cl<sub>2</sub>, 1/2/1, v/v);  $[\alpha]_D^{35} +22.1$  (c 3.2, CHCl<sub>3</sub>);  $\delta_H$  (500 MHz, CDCl<sub>3</sub>, Me<sub>4</sub>Si): 8.79 (d,  $J = 4$  Hz, 1H), 8.21 (d,  $J = 7.5$  Hz, 1H), 7.81 – 7.76 (m, 4H), 7.73 (s, 1H), 7.46 – 7.40 (m, 4H), 5.57 (s, 1H), 5.55 (d,  $J = 4.5$  Hz, 1H), 4.85 (d,  $J = 12.5$  Hz, 1H), 4.69 (d,  $J = 12$  Hz, 1H), 4.60 (dd,  $J = 2.5$  Hz,  $J = 8$  Hz, 1H), 4.57 (dd,  $J = 1.5$  Hz,  $J = 10$  Hz, 1H), 4.32 – 4.30 (m, 1H), 4.22 (dd,  $J = 1.5$  Hz,  $J = 8$  Hz, 1H), 4.09 (dd,  $J = 3$  Hz,  $J = 11$  Hz, 1H), 4.04 (d,  $J = 7.5$  Hz, 1H), 3.74 – 3.69 (m, 2H), 3.65 (q,  $J = 6$  Hz, 1H), 2.23 (dd,  $J = 3.5$  Hz,  $J = 12$  Hz, 1H), 2.02 (dd,  $J = 10$  Hz,  $J = 12.5$  Hz, 1H), 1.54 (s, 3H), 1.44 (s, 3H), 1.33 (s, 3H), 1.32 (s, 3H), 1.29 (d,  $J = 6.5$  Hz, 3H);  $\delta_C$  (125 MHz, CDCl<sub>3</sub>): 164.7, 150.2, 147.8, 137.1, 135.4, 133.3, 133.1, 128.3, 128.0, 127.7, 127.0, 126.5, 126.2, 126.0, 125.7, 109.5, 108.8, 101.1 (C-1'), 96.4 (C-1), 73.9 (C-3'), 71.6, 70.8, 70.5, 70.4, 69.6 (C-5'), 69.5 (C-4'), 69.1, 68.1, 33.4, 26.2, 26.1, 25.1, 24.5, 16.9; **HRMS (ESI)**: calcd for C<sub>35</sub>H<sub>41</sub>NNaO<sub>10</sub><sup>+</sup> [M + Na]<sup>+</sup> 658.2623, found  $m/z$  658.2605. The  $\alpha/\beta$  ratio was determined by HPLC after deprotection of picoloyl protecting group in **16** and observed as 1/7 ( $\alpha/\beta$ ). Eluent: Hexane/EtOAc = 7/3; Retention time:  $\alpha$  anomer = 32.8 min;  $\beta$  anomer = 35.3 min (Figure S4).

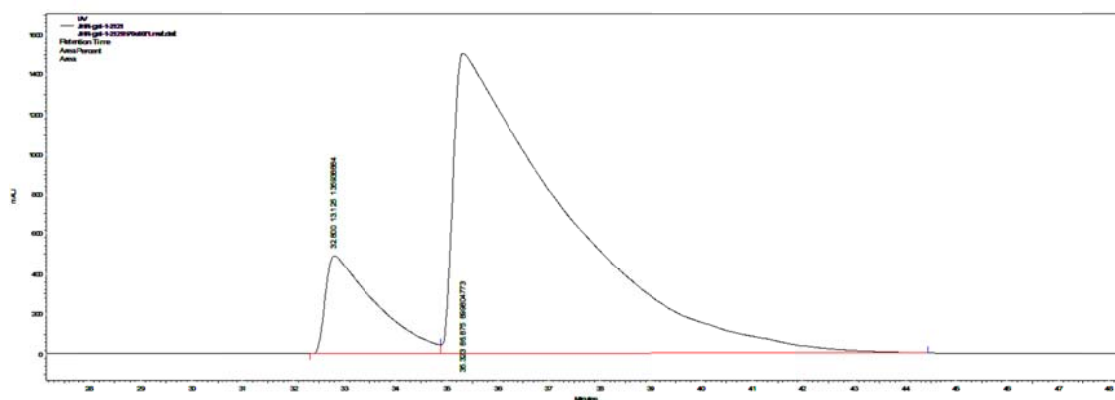

**Figure S4.** HPLC chromatogram of **16** after Pico deprotection

### 2.3.4 Methyl 3-*O*-(2-Naphthylmethyl)-4-*O*-picoloyl-2,6-dideoxy- $\beta$ -D-galactopyranosyl-(1 $\rightarrow$ 4)-3-*O*-(2-naphthylmethyl)-2,6-dideoxy- $\alpha$ -D-glucopyranoside (**17**)

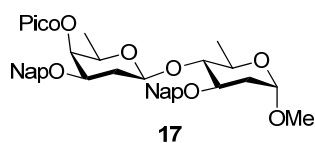

The compound **17** was synthesized by following the general glycosylation procedure (**2.1**) with glycosyl donor **5** (120 mg, 0.24 mmol), methyl 3-*O*-(2-naphthylmethyl)-2,6-dideoxy- $\alpha$ -D-glucopyranoside **11** (58 mg, 0.19 mmol), NIS (54.0 mg, 0.24 mmol), TfOH (4.2  $\mu$ L, 0.048 mmol) and activated AW300 MS (1.2 g) in CH<sub>2</sub>Cl<sub>2</sub> (24 mL). The reaction mixture was stirred for 24 hours at -50 °C. The crude product was purified by silica-gel column chromatography (EtOAc/hexane, 1/1) to get **17** (98 mg) as a white slimy amorphous (83% yield for  $\alpha/\beta$  1:11).

Analytical data for **17**:  $R_f$  = 0.2 (EtOAc/hexane, 1/1, v/v);  $[\alpha]_D^{35}$  +98.9 (c 3.1, CHCl<sub>3</sub>);  $\delta_H$  (500 MHz, CDCl<sub>3</sub>, Me<sub>4</sub>Si): 8.75 – 8.74 (m, 1H), 8.11 (d,  $J$  = 7.8 Hz, 1H), 7.78 – 7.68 (m, 8H), 7.58 – 7.56 (m, 1H), 7.52 (dd,  $J$  = 0.6 Hz,  $J$  = 8.4 Hz, 1H), 7.45 – 7.38 (m, 5H), 7.35 – 7.33 (m, 1H), 5.53 (s, 1H), 4.99 (d,  $J$  = 12 Hz, 1H), 4.87 (d,  $J$  = 12 Hz, 1H), 4.81 (d,  $J$  = 12 Hz, 1H), 4.79 (dd,  $J$  = 1.8 Hz,  $J$  = 10.2 Hz, 1H), 4.73 (d,  $J$  = 2.4 Hz, 1H), 4.62 (d,  $J$  = 12 Hz, 1H), 3.98 (ddd,  $J$  = 5.4 Hz,  $J$  = 9,  $J$  = 11.4 Hz, 1H), 3.76 (dq,  $J$  = 6.6 Hz,  $J$  = 9 Hz, 1H), 3.65 (ddd,  $J$  = 3 Hz,  $J$  = 4.2 Hz,  $J$  = 12 Hz, 1H), 3.52 (q,  $J$  = 6 Hz, 1H), 3.42 – 3.39 (m, 1H), 3.29 (s, 3H), 2.27, (dd,  $J$  = 4.8 Hz,  $J$  = 13.2 Hz, 1H), 2.14 (ddd,  $J$  = 1.2 Hz,  $J$  = 3.6 Hz,  $J$  = 12 Hz, 1H), 2.02 (ddd,  $J$  = 1.8 Hz,  $J$  = 12 Hz, 1H), 1.73 (ddd,  $J$  = 3.6 Hz,  $J$  = 12 Hz,  $J$  = 13.2 Hz, 1H), 1.31 (d,  $J$  = 6.6 Hz, 3H), 1.23 (d,  $J$  = 6 Hz, 3H);  $\delta_C$  (125 MHz, CDCl<sub>3</sub>): 164.6, 150.2, 147.7, 137.0, 136.7, 135.3, 133.32, 133.30, 133.1, 132.9, 128.4, 128.01, 127.98, 127.79, 127.75, 127.7, 127.0, 126.8, 126.2, 126.1, 126.0, 125.94, 125.91, 125.9, 125.8, 125.5, 100.8, 98.3, 83.3, 75.9, 74.1, 72.3, 70.6, 69.8, 69.2, 66.8, 54.6, 36.0, 34.0, 18.4, 17.1; HRMS (ESI): calcd for C<sub>41</sub>H<sub>43</sub>NNaO<sub>8</sub><sup>+</sup> [M + Na]<sup>+</sup> 700.2881, found  $m/z$  700.2894. The  $\alpha/\beta$  ratio was determined by HPLC after deprotection of Picoloyl protecting group in **17** and observed as

1/11 ( $\alpha/\beta$ ). Eluent: Hexane/EtOAc = 7/3; Retention time:  $\alpha$  anomer = 14.5 min;  $\beta$  anomer = 21.8 min (Figure S5).

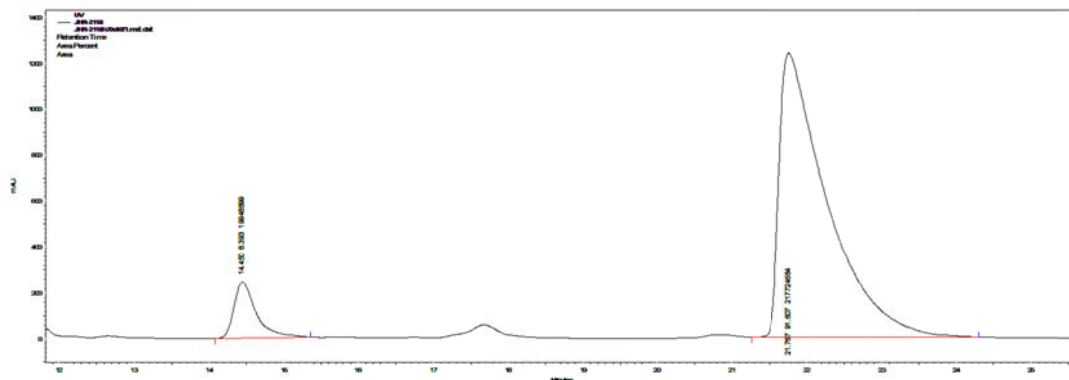

**Figure S5.** HPLC chromatogram of **17** after Pico deprotection.

### 2.3.5 Methyl 3-*O*-(2-Naphthylmethyl)-4-*O*-picoloyl-2,6-dideoxy- $\beta$ -D-galactopyranosyl-(1 $\rightarrow$ 4)-2,3-*O*-isopropylidene- $\alpha$ -L-rhamnopyranoside (**18**)

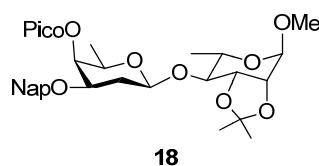

The compound **18** was synthesized by following the general glycosylation procedure (2.1) with glycosyl donor **5** (137 mg, 0.27 mmol), methyl 2,3-*O*-isopropylidene- $\alpha$ -L-rhamnopyranoside **13**<sup>3</sup> (50 mg, 0.22 mmol), NIS (61.0 mg, 0.27 mmol), TfOH (4.8  $\mu$ L, 0.055 mmol) and activated AW300 MS (1.40 g) in  $\text{CH}_2\text{Cl}_2$  (28 mL). The reaction mixture was stirred for 24 hours at  $-50$   $^\circ\text{C}$ . The crude product was purified by silica-gel column chromatography (ethyl acetate/hexane, 2/3) to obtain **18** (110 mg, 84%) as a single anomer.

Analytical data for **18**:  $R_f = 0.4$  (EtOAc/hexane, 2/3, v/v);  $[\alpha]_D^{35} +45.0$  (c 2.1,  $\text{CHCl}_3$ );  $\delta_{\text{H}}$  (300 MHz,  $\text{CDCl}_3$ ,  $\text{Me}_4\text{Si}$ ): 8.85 – 8.76 (m, 1H), 8.19 (td,  $J = 7.8$  Hz,  $J = 1.2$  Hz, 1H), 7.70 – 7.70 (m, 5H), 7.54 – 7.38 (m, 4H), 5.58 (d,  $J = 3.0$  Hz, 1H), 4.98 – 4.82 (m, 3H), 4.69 (d,  $J = 12.1$ , Hz, 1H), 4.17 (t,  $J = 6.1$  Hz, 1H), 4.08 (dd,  $J = 5.4$  Hz,  $J = 1.8$  Hz, 1H), 3.80 –

3.57 (m, 4H), 3.37 (s, 3H), 2.20 – 2.08 (m, 1H), 2.05 – 1.85 (m, 1H), 1.50 (s, 3H), 1.40 (d,  $J = 5.4$  Hz, 3H), 1.32 (s, 3H), 1.28 (d,  $J = 6.3$  Hz, 3H);  $\delta_C$  (75 MHz,  $\text{CDCl}_3$ ): 164.5, 150.0, 147.6, 137.1, 135.3, 133.1, 133.0, 128.3, 127.8, 127.6, 127.0, 126.5, 126.0, 125.9, 125.6, 125.5, 109.1, 98.6, 97.8, 78.4, 77.7, 76.0, 73.9, 70.3, 69.4, 64.2, 54.7, 33.6, 27.8, 26.4, 17.6, 16.7. **HRMS (ESI)**: calcd for  $\text{C}_{30}\text{H}_{40}\text{NO}_9^+$   $[\text{M} + \text{H}]^+$  594.2698, found  $m/z$  594.2708. The  $\alpha/\beta$  ratio was determined to be 1:6.2 by HPLC; Eluent: Hexane/EtOAc/ $\text{CH}_2\text{Cl}_2 = 60/10/30$ ; Retention time:  $\alpha$  anomer = 12.9 min,  $\beta$  anomer = 19.2 min (Figure S6).

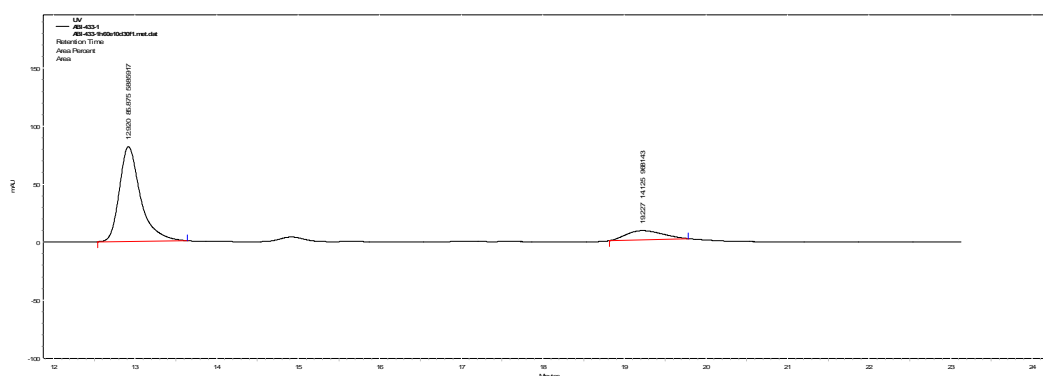

**Figure S6.** HPLC chromatogram of **18** after Pico deprotection.

### 2.3.6 4-*O*-Benzyl-3-*O*-(2-naphthylmethyl)-6-*O*-picoloyl-2-deoxy- $\beta$ -D-galactopyranosyl-(1 $\rightarrow$ 6)-1,2,3,4-di-*O*-isopropylidene- $\alpha$ -D-galactopyranoside (**19**)

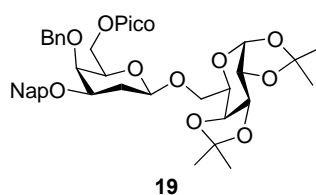

The compound **19** was synthesized by following the general glycosylation procedure (**2.1**) with glycosyl donor **6** (133 mg, 0.21 mmol), 1,2:3,4-di-*O*-isopropylidene- $\alpha$ -D-galactopyranose **3** (44 mg, 0.16 mmol), NIS (59.2 mg, 0.26 mmol), TfOH (3.9  $\mu\text{L}$ , 0.043 mmol) and activated AW300 MS (1.3 g) in  $\text{CH}_2\text{Cl}_2$  (21 mL). The reaction mixture was stirred for 24 hours at  $-50$   $^\circ\text{C}$ . The silica-gel column chromatography of crude product with ethyl acetate in hexane (2:3 to 1:1) provided **19** (80 mg, 79%) as a single anomer.

Analytical data for **19**:  $R_f = 0.2$  (EtOAc/hexane, 2/3, v/v);  $[\alpha]_D^{20} = +2.0$  (c 0.98,  $\text{CHCl}_3$ );  $\delta_{\text{H}}$  (400 MHz,  $\text{CDCl}_3$ ,  $\text{Me}_4\text{Si}$ ): 8.75 – 8.73 (dq,  $J = 4.4$  Hz,  $J = 0.8$  Hz, 1H), 8.02 – 8.00 (d,  $J = 8.0$  Hz, 1H), 7.84 – 7.77 (m, 5H), 7.49 – 7.43 (m, 4H), 7.37 – 7.35 (dd,  $J = 8.4$  Hz,  $J = 1.2$  Hz, 2H), 7.26 – 7.22 (m, 2H), 7.18 – 7.14 (m, 1H), 5.49 – 5.48 (d,  $J = 4.8$  Hz, 1H), 5.09 – 5.08 (d,  $J = 2.8$  Hz, 1H), 5.01 – 4.98 (d,  $J = 11.6$  Hz, 1H), 4.81 – 4.75 (dd,  $J = 14.4$  Hz,  $J = 12$  Hz, 2H), 4.73 – 4.71 (d,  $J = 11.6$  Hz, 1H), 4.57 – 4.54 (dd,  $J = 8.0$  Hz,  $J = 2.4$  Hz, 1H), 4.51 – 4.43 (ddd,  $J = 17.6$  Hz,  $J = 10.8$  Hz,  $J = 6.4$  Hz, 2H), 4.28 – 4.26 (dd,  $J = 5.2$  Hz,  $J = 2.4$  Hz, 1H), 4.21 – 4.17 (t,  $J = 6.4$  Hz, 1H), 4.17 – 4.14 (dd,  $J = 8.0$  Hz,  $J = 2.0$  Hz, 1H), 4.09 – 4.04 (ddd,  $J = 11.6$  Hz,  $J = 4.4$  Hz,  $J = 2.4$  Hz, 1H), 4.00 (s, 1H), 3.95 – 3.91 (td,  $J = 6.4$  Hz,  $J = 1.6$  Hz, 1H), 3.77 – 3.73 (dd,  $J = 10.8$  Hz,  $J = 6.8$  Hz, 1H), 3.68 – 3.64 (dd,  $J = 10.8$  Hz,  $J = 6.0$  Hz, 1H), 2.33 – 2.26 (td,  $J = 12.4$  Hz,  $J = 3.6$  Hz, 1H), 2.12 – 2.08 (dd,  $J = 12.8$  Hz,  $J = 4.8$  Hz, 1H), 1.45 (s, 3H), 1.35 (s, 3H), 1.30 (s, 3H), 1.28 (s, 3H);  $\delta_{\text{C}}$  (100 MHz,  $\text{CDCl}_3$ ): 164.54, 149.8, 147.8, 138.4, 136.8, 135.9, 133.2, 132.8, 128.3, 128.2, 128.0, 127.8, 127.6, 127.5, 126.7, 126.0, 125.9, 125.7, 125.4, 125.2, 109.2, 108.4, 97.3, 96.2, 74.7, 74.1, 72.5, 71.0, 70.6, 70.5, 68.9, 65.8, 65.6, 64.8, 30.9, 26.0, 25.8, 24.8, 24.4; HRMS (ESI): calcd for  $\text{C}_{42}\text{H}_{47}\text{NNaO}_{11}^+$   $[\text{M} + \text{Na}]^+$  764.3047, found  $m/z$  764.3041.

### 2.3.7 6-*O*-Benzoyl-4-*O*-benzyl-3-*O*-(2-naphthylmethyl)-2-deoxy- $\alpha$ -D-galactopyranosyl-(1 $\rightarrow$ 6)-1,2,3,4-di-*O*-isopropylidene- $\alpha$ -D-galactopyranoside (**19'**)

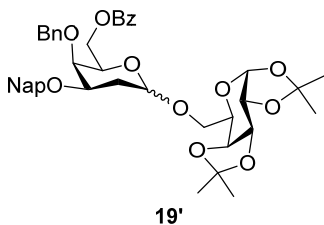

The compound **19'** was synthesized by following the general glycosylation procedure (**2.1**) with glycosyl donor **6'** (73 mg, 0.12 mmol), 1,2:3,4-di-*O*-isopropylidene- $\alpha$ -D-galactopyranose **3** (24 mg, 0.09 mmol), NIS (32.5 mg, 0.14 mmol), TfOH (2.1  $\mu\text{L}$ , 0.024



mmol) and activated AW300 MS (730 mg) in CH<sub>2</sub>Cl<sub>2</sub> (12 mL). The reaction mixture was stirred for 1 hour at -50 °C. The silica-gel column chromatography of crude product with ethyl acetate in hexane (1:4) provided **19'** (54 mg, 79%) as anomeric mixture ( $\alpha/\beta$ , 6:1).  $\alpha:\beta$  Ratio was determined by NMR spectra (see pp 99-100).

### 2.3.8 Methyl 4-*O*-Benzyl-3-*O*-(2-naphthylmethyl)-6-*O*-picoloyl-2-deoxy- $\beta$ -D-galactopyranosyl-(1 $\rightarrow$ 4)-3-*O*-benzyl-2,6-dideoxy- $\alpha$ -D-glucopyranoside (**20**)

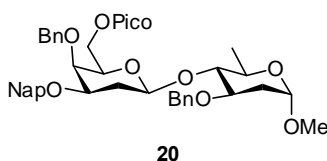

The compound **20** was synthesized by following the general glycosylation procedure (**2.1**) with glycosyl donor **6** (135 mg, 0.22 mmol), methyl 3-*O*-benzyl-2,6-dideoxy- $\alpha$ -D-glucopyranoside **12<sup>2</sup>** (43 mg, 0.17 mmol), NIS (60.3 mg, 0.26 mmol), TfOH (3.9  $\mu$ L, 0.044 mmol) and activated AW300 MS (1.4 g) in CH<sub>2</sub>Cl<sub>2</sub> (22 mL). The reaction mixture was stirred for 48 hours at -50 °C. The silica-gel column chromatography of crude product with ethyl acetate in hexane (2:3 to 1:1) afforded **20** (73 mg, 63%) as a single anomer.

Analytical data for **20**:  $R_f$  = 0.3 (EtOAc/hexane, 2/3, v/v);  $[\alpha]_D^{20}$  = +42.1 (c 0.95, CHCl<sub>3</sub>);  $\delta_H$  (400 MHz, CDCl<sub>3</sub>, Me<sub>4</sub>Si): 8.74 – 8.73 (dt,  $J$  = 4.8 Hz,  $J$  = 0.8 Hz, 1H), 8.00 – 7.98 (d,  $J$  = 7.6 Hz, 1H), 7.84 – 7.76 (m, 5H), 7.48 – 7.42 (m, 4H), 7.36 – 7.16 (m, 9H), 5.59 – 5.58 (d,  $J$  = 3.2 Hz, 1H), 5.00 – 4.97 (d,  $J$  = 11.6 Hz, 1H), 4.74 – 4.69 (m, 4H), 4.58 – 4.55 (d,  $J$  = 11.2 Hz, 1H), 4.52 – 4.43 (ddd,  $J$  = 24.8 Hz,  $J$  = 11.2 Hz,  $J$  = 7.2 Hz, 2H), 4.42 – 4.39 (d,  $J$  = 11.2 Hz, 1H), 4.23 – 4.20 (t,  $J$  = 6.0 Hz, 1H), 3.99 (s, 1H), 3.98 – 3.95 (m, 1H), 3.82 – 3.79 (ddd,  $J$  = 11.2 Hz,  $J$  = 6.4 Hz,  $J$  = 3.6 Hz, 1H), 3.61 – 3.54 (td,  $J$  = 6.4 Hz,  $J$  = 1.6 Hz, 1H), 3.35 – 3.30 (t,  $J$  = 8.8 Hz, 1H), 3.26 (s, 3H), 2.27 – 2.20 (td,  $J$  = 12.8 Hz,  $J$  = 3.6 Hz, 2H), 2.00 – 1.96 (dd,  $J$  = 12.4 Hz,  $J$  = 4.4 Hz, 1H), 1.62 – 1.55 (td,  $J$  = 12.2 Hz,  $J$  = 3.6 Hz, 1H),

1.17 – 1.15 (d,  $J = 6.0$  Hz, 3H);  $\delta_C$  (100 MHz, CDCl<sub>3</sub>): 164.7, 149.8, 147.7, 138.4, 138.2, 136.8, 135.9, 133.2, 132.9, 128.4, 128.3, 128.2, 128.1, 127.8, 127.7, 127.6, 127.5, 127.4, 126.8, 126.1, 125.9, 125.8, 125.4, 125.1, 99.4, 98.1, 81.3, 77.6, 74.8, 74.0, 72.8, 70.9, 70.6, 69.5, 66.3, 65.5, 54.5, 34.9, 31.2, 18.5; HRMS (ESI): calcd for C<sub>44</sub>H<sub>47</sub>NNaO<sub>9</sub><sup>+</sup> [M + Na]<sup>+</sup> 756.3149, found  $m/z$  756.3143.

### 2.3.9 Methyl 4-*O*-Benzyl-3-*O*-(2-naphthylmethyl)-6-*O*-picoloyl-2-deoxy- $\beta$ -D-galactopyranosyl-(1 $\rightarrow$ 3)-4-*O*-benzyl-2,6-dideoxy- $\alpha$ -D-glucopyranoside (**21**)

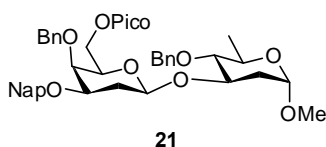

The compound **21** was synthesized by following the general glycosylation procedure (**2.1**) with glycosyl donor **6** (142 mg, 0.23 mmol), methyl 4-*O*-benzyl-2,6-dideoxy- $\alpha$ -D-glucopyranoside **14**<sup>4</sup> (45 mg, 0.18 mmol), NIS (63.2 mg, 0.28 mmol), TfOH (4.1  $\mu$ L, 0.046 mmol) and activated AW300 MS (1.4 g) in CH<sub>2</sub>Cl<sub>2</sub> (23 mL). The reaction mixture was stirred for 24 hours at  $-50$  °C. The silica-gel column chromatography of crude residue with ethyl acetate in hexane (2:3 to 1:1) gave **21** (79 mg, 60%) as a single anomer.

Analytical data for **21**:  $R_f = 0.2$  (2:3 EtOAc/hexane);  $[\alpha]_D^{20} = +61.3$  (c 1.99, CHCl<sub>3</sub>);  $\delta_H$  (400 MHz, CDCl<sub>3</sub>, Me<sub>4</sub>Si): 8.75 – 8.73 (dt,  $J = 4.8$  Hz,  $J = 0.8$  Hz, 1H), 8.05 – 8.03 (d,  $J = 8$  Hz, 1H), 7.82 – 7.76 (m, 5H), 7.47 – 7.44 (m, 4H), 7.39 – 7.19 (m, 9H), 5.27 – 5.26 (d,  $J = 3.2$  Hz, 1H), 5.02 – 4.99 (d,  $J = 11.6$  Hz, 1H), 4.76 – 4.68 (m, 4H), 4.55 – 4.49 (m, 2H), 4.44 – 4.40 (d,  $J = 11.2$  Hz,  $J = 5.2$  Hz, 1H), 4.36 – 4.35 (d,  $J = 3.2$  Hz, 1H), 4.19 – 4.16 (t,  $J = 6.0$  Hz, 1H), 4.03 – 3.94 (m, 3H), 3.65 – 3.58 (m, 1H), 3.10 (s, 3H), 2.98 – 2.93 (t,  $J = 9.2$  Hz, 1H), 2.30 – 2.24 (td,  $J = 12.4$  Hz,  $J = 4.0$  Hz, 1H), 2.23 – 2.19 (dd,  $J = 12.8$  Hz,  $J = 6.0$  Hz, 1H), 1.98 – 1.93 (dd,  $J = 12.4$  Hz,  $J = 4.4$  Hz, 1H), 1.61 – 1.54 (td,  $J = 12.4$  Hz,  $J = 4.0$  Hz, 1H), 1.22 – 1.20 (d,  $J = 6.4$  Hz, 3H);  $\delta_C$  (100 MHz, CDCl<sub>3</sub>): 164.7, 149.8, 147.8, 138.4, 138.3,

136.7, 135.7, 133.2, 132.9, 128.4, 128.3, 128.2, 128.1, 127.8, 127.7, 127.6, 127.5, 126.7, 126.1, 125.9, 125.8, 125.3, 125.2, 99.9, 97.9, 84.1, 77.3, 75.0, 74.5, 74.1, 72.6, 70.5, 69.0, 66.7, 65.5, 54.2, 37.2, 31.6, 18.0; **HRMS (ESI)**: calcd for  $C_{44}H_{47}NNaO_9^+$   $[M + Na]^+$  756.3149, found  $m/z$  756.3143.

### 2.3.10 Methyl 3-*O*-Benzoyl-4-*O*-benzyl-6-*O*-picoloyl-2-deoxy- $\beta$ -D-allopyranosyl-(1 $\rightarrow$ 3)-2,3,6-tri-*O*-benzyl- $\alpha$ -D-glucopyranoside (**22**)

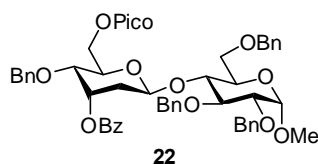

The compound **22** was synthesized by following the general glycosylation procedure (**2.1**) with glycosyl donor **2a** (137 mg, 0.24 mmol), methyl 2,3,6-tri-*O*-benzyl- $\alpha$ -D-glucopyranoside **10**<sup>5</sup> (93 mg, 0.2 mmol), NIS (54 mg, 0.24 mmol), TfOH (4.2  $\mu$ L, 0.048 mmol) and activated AW300 MS (1.4 g) in  $CH_2Cl_2$  (24 mL). The reaction mixture was stirred for 24 hours at  $-50$  °C. The silica-gel column chromatography of crude residue with mixture of ethyl acetate, hexane and  $CH_2Cl_2$  (2:1:1) gave **22** (90 mg) as a colorless oil (50% yield for  $\alpha/\beta$  1:8).

Analytical data for **22**:  $R_f$  = 0.2 (hexane/EtOAc/ $CH_2Cl_2$ , 2/1/1, v/v);  $[\alpha]_D^{35} +57.8$  (c 3.3,  $CHCl_3$ );  $\delta_H$  (500 MHz,  $CDCl_3$ ,  $Me_4Si$ ): 8.71 (d,  $J$  = 4.5 Hz, 1H), 7.98 – 7.96 (m, 2H), 7.84 (d,  $J$  = 7.5 Hz, 1H), 7.63 – 7.60 (m, 1H), 7.53 – 7.50 (m, 1H), 7.39-7.37 (m, 1H), 7.32 – 7.10 (m, 21H), 7.06 – 7.03 (m, 1H), 5.86 (d,  $J$  = 2.5 Hz, 1H), 5.25 (d,  $J$  = 9.5 Hz, 1H), 5.03 (d,  $J$  = 11 Hz, 1H), 4.82 (d,  $J$  = 11 Hz, 1H), 4.71 (d,  $J$  = 12.5 Hz, 1H), 4.64 (d,  $J$  = 11.5 Hz, 1H), 4.58 (s, 1H), 4.57 (d,  $J$  = 7.5 Hz, 1H), 4.53 (dd,  $J$  = 4.5 Hz,  $J$  = 12 Hz, 1H), 4.47 (dd,  $J$  = 1.5 Hz,  $J$  = 11.5 Hz, 1H), 4.43 (d,  $J$  = 5 Hz, 2H), 4.38 (d,  $J$  = 11.5 Hz, 1H), 4.18 – 4.17 (m, 1H), 3.97 – 3.91 (m, 2H), 3.73 – 3.67 (m, 2H), 3.61 (d,  $J$  = 2 Hz, 2H), 3.50 – 3.47 (m, 1H), 3.33 (s, 3H), 2.17 (ddd,  $J$  = 1.5 Hz,  $J$  = 2.5 Hz,  $J$  = 14.5 Hz, 1H), 1.84 (ddd,  $J$  = 2 Hz,  $J$  = 12 Hz,  $J$  = 14 Hz,

1H);  $\delta_C$  (125 MHz,  $CDCl_3$ ): 165.7, 164.6, 149.9, 147.8, 139.3, 138.3, 137.8, 137.1, 136.8, 133.3, 129.9, 129.8, 128.6, 128.4, 128.4, 128.2, 128.1, 127.9, 127.9, 127.7, 127.4, 127.4, 127.3, 126.8, 125.3, 98.9 (C-1'), 98.3 (C-1), 80.6, 79.4, 76.9, 75.3, 73.6, 73.4, 72.6, 71.9, 71.2, 69.7, 68.5, 66.6, 64.9, 55.3, 36.0; **HRMS (ESI)**: calcd for  $C_{54}H_{55}NNaO_{12}^+$   $[M + Na]^+$  932.3616, found  $m/z$  932.3595. The  $\alpha/\beta$  ratio was determined by HPLC after deprotection of Picoloyl protecting group in **22** and observed as 1/8 ( $\alpha/\beta$ ). Eluent: Hexane/EtOAc = 4/1; retention time:  $\alpha$  anomer = 22.7 min;  $\beta$  anomer = 16.0 min (Figure S7).

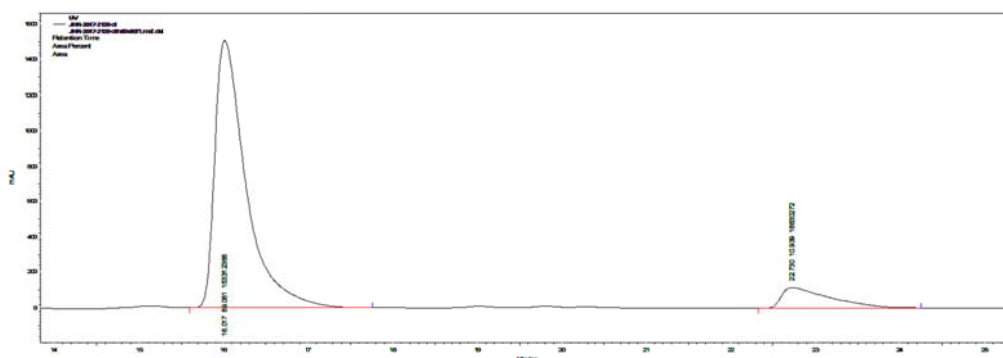

**Figure S7.** HPLC chromatogram of **22** after Pico deprotection.

### 2.3.11 Methyl 3-*O*-Benzoyl-4-*O*-benzyl-6-*O*-picoloyl-2-deoxy- $\beta$ -D-allopyranosyl-(1 $\rightarrow$ 3)-3-*O*-(2-naphthylmethyl)-2,6-dideoxy- $\alpha$ -D-glucopyranoside (**23**)

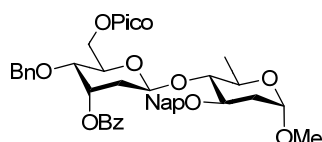

**23**

The compound **23** was synthesized by following the general glycosylation procedure (**2.1**) with glycosyl donor **2a** (137 mg, 0.24 mmol), methyl 3-*O*-(2-naphthylmethyl)-2,6-dideoxy- $\alpha$ -D-glucopyranoside **11** (58 mg, 0.2 mmol), NIS (54 mg, 0.24 mmol), TfOH (4.2  $\mu$ L, 0.048 mmol) and activated AW300 MS (1.40 g) in  $CH_2Cl_2$  (24 mL). The reaction mixture was stirred for 24 hours at  $-50^\circ C$ . The crude product was purified by silica-gel column chromatography with (1:1) EtOAc in hexane to provide **23** (80 mg) as a white powder (54% yield for  $\alpha/\beta$  1:7.5).

Analytical data for **23**:  $R_f = 0.25$  (EtOAc/hexane, 1/1, v/v);  $[\alpha]_D^{35} +103.4$  (c 0.4,  $\text{CHCl}_3$ );  $\delta_{\text{H}}$  (600 MHz,  $\text{CDCl}_3$ ,  $\text{Me}_4\text{Si}$ ): 8.62 – 8.61 (m, 1H), 8.00 (d,  $J = 7.8$  Hz, 2H), 7.80 (d,  $J = 7.2$  Hz, 1H), 7.74 – 7.66 (m, 4H), 7.57 – 7.53 (m, 2H), 7.43 – 7.36 (m, 5H), 7.31 – 7.29 (m, 1H), 7.21 – 7.07 (m, 5H), 5.92 – 5.91 (m, 1H), 5.31 (d,  $J = 9.6$  Hz, 1H), 4.94 (d,  $J = 12$  Hz, 1H), 4.72 – 4.67 (m, 3H), 4.68 (s, 1H), 4.57 (d,  $J = 3$  Hz, 2H), 4.41 (d,  $J = 11.4$  Hz, 1H), 4.29 – 4.27 (m, 1H), 3.93 – 3.89 (m, 1H), 3.71 – 3.69 (m, 1H), 3.41 – 3.38 (m, 1H), 3.25 (s, 3H), 2.31 (ddd,  $J = 1.8$  Hz,  $J = 3.6$  Hz,  $J = 14.4$  Hz, 1H), 2.17 (dd,  $J = 4.8$  Hz,  $J = 13.2$  Hz, 1H), 1.97 (ddd,  $J = 2.4$  Hz,  $J = 9.6$  Hz,  $J = 13.8$  Hz, 1H), 1.67 (ddd,  $J = 3.6$  Hz,  $J = 11.4$  Hz,  $J = 14.4$  Hz, 1H), 1.25 (d,  $J = 6.6$  Hz, 3H);  $\delta_{\text{C}}$  (150 MHz,  $\text{CDCl}_3$ ): 165.9, 164.84, 149.83, 147.9, 137.3, 136.9, 136.8, 133.4, 133.39, 133.0, 130.2, 129.9, 128.7, 128.54, 128.49, 128.1, 128.02, 127.95, 127.9, 126.8, 126.1, 125.9, 125.80, 125.76, 125.3, 99.3, 98.3, 83.9, 75.6, 72.9, 72.3, 72.0, 71.3, 66.9, 66.8 (C-3'), 65.2, 54.7, 36.2, 36.0, 18.4; HRMS (ESI): calcd for  $\text{C}_{44}\text{H}_{45}\text{NNaO}_{10}^+$   $[\text{M} + \text{Na}]^+$  770.2936, found  $m/z$  770.2952. The  $\alpha/\beta$  ratio was determined by HPLC after deprotection of Picoloyl protecting group in **23** and observed as 1/7.6 ( $\alpha/\beta$ ). Eluent: Hexane/EtOAc = 1/1; retention time:  $\alpha$  anomer = 12.7 min;  $\beta$  anomer = 11.6 min (Figure S8).

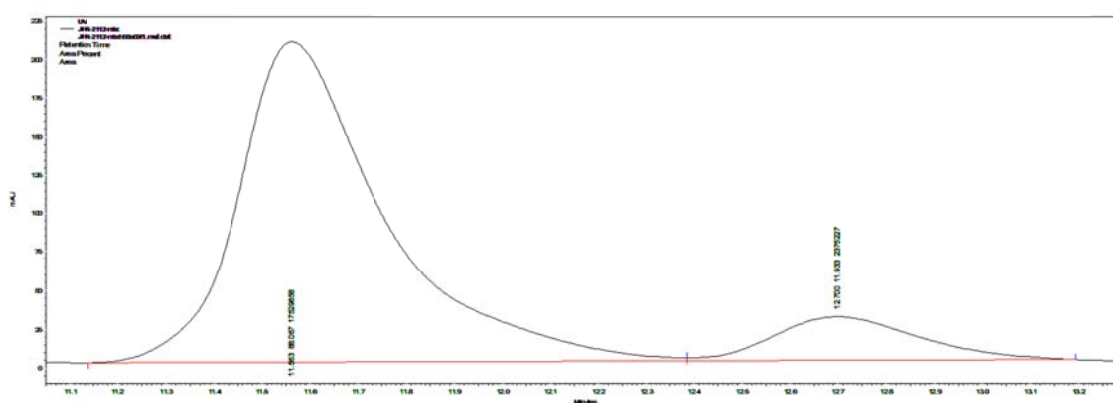

**Figure S8.** HPLC chromatogram of **23** after Pico deprotection.

### 2.3.12 4-*O*-(*tert*-Butyldimethylsilyl)-3-*O*-(2-naphthylmethyl)-6-*O*-picoloyl-2-deoxy- $\beta$ -D-glucopyranosyl-(1 $\rightarrow$ 6)-1,2,3,4-di-*O*-isopropylidene- $\alpha$ -D-galactopyranoside (**24**)

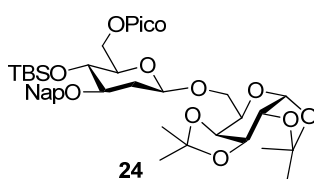

The compound **24** was synthesized by following the general glycosylation procedure (**2.1**) with glycosyl donor **7** (148 mg, 0.24 mmol), 1,2:3,4-di-*O*-isopropylidene- $\alpha$ -D-galactopyranose **3** (52 mg, 0.2 mmol), NIS (54 mg, 0.24 mmol), TfOH (4.2  $\mu$ L, 0.048 mmol) and activated AW300 MS (1.5 g) in  $\text{CH}_2\text{Cl}_2$  (24 mL). The reaction mixture was stirred for 24 hours at  $-50\text{ }^\circ\text{C}$ . The crude residue was purified by silica-gel column chromatography with mixture of ethyl acetate, hexane and  $\text{CH}_2\text{Cl}_2$  (1:1:1) to provide **24** (108 mg) as a thick gum (70% yield for  $\alpha/\beta$  1:12).

Analytical data for **24**:  $R_f = 0.4$  (hexane/EtOAc/ $\text{CH}_2\text{Cl}_2$ , 1/1/1, v/v);  $[\alpha]_D^{35} -39.7$  (*c* 3.1,  $\text{CHCl}_3$ );  $\delta_{\text{H}}$  (600 MHz,  $\text{CDCl}_3$ ,  $\text{Me}_4\text{Si}$ ): 8.73 – 8.73 (m, 1H), 8.08 (d,  $J = 7.8$  Hz, 1H), 7.80 – 7.75 (m, 5H), 7.44 – 7.40 (m, 4H), 5.49 (d,  $J = 3.6$  Hz, 1H), 4.74 (d,  $J = 12$  Hz, 1H), 4.70 (d,  $J = 12$  Hz, 1H), 4.60 (d,  $J = 11.4$  Hz, 1H), 4.57 (d,  $J = 12$  Hz, 1H), 4.53 – 4.48 (m, 2H), 4.24 – 4.24 (m, 1H), 4.10 (d,  $J = 7.8$  Hz, 1H), 3.96 – 3.93 (m, 2H), 3.70 – 3.68 (m, 1H), 3.65 – 3.62 (m, 1H), 3.59 – 3.56 (m, 1H), 3.49 (ddd,  $J = 4.2$  Hz,  $J = 7.2$  Hz,  $J = 10.8$  Hz, 1H), 2.49 (dd,  $J = 3$  Hz,  $J = 11.4$  Hz, 1H), 1.63 (dd,  $J = 1.2$  Hz,  $J = 11.4$  Hz, 1H), 1.46 (s, 3H), 1.36 (s, 3H), 1.27 (s, 3H), 1.24 (s, 3H), 0.83 (s, 9H), 0.03 (s, 3H), 0.00 (s, 3H);  $\delta_{\text{C}}$  (150 MHz,  $\text{CDCl}_3$ ): 164.9, 150.0, 148.1, 137.0, 135.7, 133.3, 133.0, 128.1, 128.0, 127.8, 126.9, 126.6, 126.2, 126.1, 125.9, 125.2, 109.4, 108.7, 100.6, 96.4, 79.3, 74.7, 71.6, 71.5, 70.9, 70.8, 70.5, 68.9, 68.0, 65.2, 36.1, 26.1, 26.0, 25.1, 24.5, 18.3, -3.6, -4.9; **HRMS (ESI)**: calcd for  $\text{C}_{41}\text{H}_{55}\text{NNaO}_{11}\text{Si}^+$   $[\text{M} + \text{Na}]^+$  788.3437, found  $m/z$  788.3449. The  $\alpha/\beta$  ratio was determined by HPLC after deprotection of picoloyl protecting group in **24** and observed as 1/12 ( $\alpha/\beta$ ). Eluent: Hexane/EtOAc = 1/1; retention time:  $\alpha$  anomer = 12.0 min;  $\beta$  anomer = 9.2 min (Figure S9).

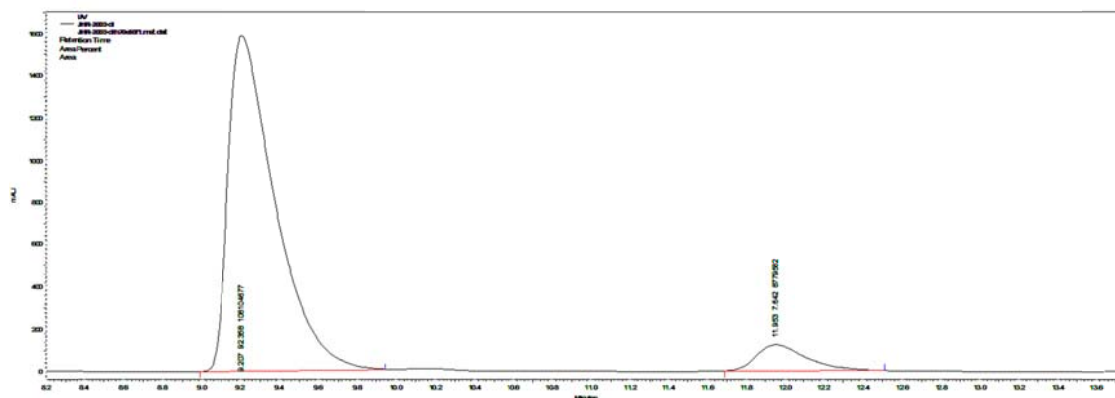

**Figure S9.** HPLC chromatogram of **24** after Pico deprotection.

**2.3.13 6-*O*-Benzoyl-4-*O*-(*tert*-butyldimethylsilyl)-3-*O*-(2-naphthylmethyl)-2-deoxy-D-glucopyranosyl-(1→6)-1,2,3,4-di-*O*-isopropylidene- $\alpha$ -D-galactopyranoside (**24'**)**

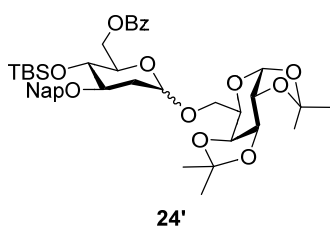

The compound **24'** was synthesized by following the general glycosylation procedure (2.1) with glycosyl donor **7'** (63 mg, 0.10 mmol), 1,2:3,4-di-*O*-isopropylidene- $\alpha$ -D-galactopyranose **3** (20 mg, 0.07 mmol), NIS (27 mg, 0.12 mmol), TfOH (1.7  $\mu$ L, 0.02 mmol) and activated AW300 MS (600 mg) in  $\text{CH}_2\text{Cl}_2$  (10 mL). The reaction mixture was stirred for 1 hour at  $-50\text{ }^\circ\text{C}$ . The crude residue was purified by silica-gel column chromatography with mixture of ethyl acetate and hexane (1:4) to provide **24'** (52 mg) as a thick gum (90% yield for  $\alpha/\beta$  2:1).  $\alpha/\beta$  Ratio was determined by NMR spectrum (see pp 121-122).

**2.3.14 Methyl 4-*O*-(*tert*-Butyldimethylsilyl)-3-*O*-(2-naphthylmethyl)-6-*O*-picoloyl-2-deoxy- $\beta$ -D-glucopyranosyl-(1→4)-3-*O*-(2-naphthylmethyl)-2,6-di-deoxy- $\alpha$ -D-glucopyranoside (**25**)**

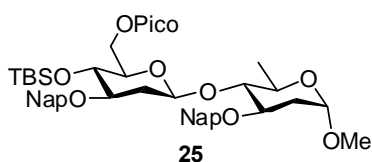

The compound **25** was synthesized by following the general glycosylation procedure (**2.1**) with glycosyl donor **7** (148 mg, 0.24 mmol), methyl 3-*O*-(2-naphthylmethyl)-2,6-dideoxy- $\alpha$ -D-glucopyranoside **11** (58 mg, 0.2 mmol), NIS (54 mg, 0.24 mmol), TfOH (4.2  $\mu$ L, 0.048 mmol) and activated AW300 MS (1.5 g) in  $\text{CH}_2\text{Cl}_2$  (24 mL). The reaction mixture was stirred for 24 hours at  $-50\text{ }^\circ\text{C}$ . The silica-gel column chromatography of crude residue with ethyl acetate and hexane (2:1) afforded **25** (96 mg) as a colorless gum (64% yield for  $\alpha/\beta$  1:9).

Analytical data for **25**:  $R_f = 0.25$  (hexane/EtOAc, 2/1, v/v);  $[\alpha]_D^{35} +43.8$  (c 3.1,  $\text{CHCl}_3$ );  $\delta_{\text{H}}$  (600 MHz,  $\text{CDCl}_3$ ,  $\text{Me}_4\text{Si}$ ): 8.61-8.60 (m, 1H), 7.95 (d,  $J = 7.8$  Hz, 1H), 7.81 – 7.80 (m, 3H), 7.76 – 7.67 (m, 5H), 7.58 – 7.56 (m, 1H), 7.48 – 7.40 (m, 6H), 7.26 – 7.24 (m, 1H), 4.87 (d,  $J = 12.6$  Hz, 1H), 4.76 (d,  $J = 9.6$  Hz, 1H), 4.73 – 4.69 (m, 3H), 4.66 (s, H-1), 4.60 (d,  $J = 11.4$  Hz, 1H), 4.46 – 4.43 (m, 1H), 3.90 – 3.86 (m, 1H), 3.72 – 3.66 (m, 2H), 3.52 – 3.50 (m, 1H), 3.46 – 3.44 (m, 1H), 3.36 – 3.33 (m, 1H), 3.22 (s, 3H), 2.38 (ddd,  $J = 1.8$  Hz,  $J = 3.6$  Hz,  $J = 12$  Hz, 1H), 2.16 (ddd,  $J = 1.2$  Hz,  $J = 3.6$  Hz,  $J = 12.6$  Hz, 1H), 1.67 – 1.62 (m, 2H), 1.20 (d,  $J = 6$  Hz, 3H), 0.85 (s, 9H), 0.04 (s, 3H), 0.02 (s, 3H);  $\delta_{\text{C}}$  (150 MHz,  $\text{CDCl}_3$ ): 165.1, 150.1, 148.1, 137.00, 136.96, 136.1, 133.6, 133.5, 133.3, 133.1, 128.4, 128.3, 128.2, 128.1, 128.06, 128.01, 126.9, 126.7, 126.5, 126.34, 126.30, 126.23, 126.21, 126.1, 126.0, 125.3, 100.3, 98.4, 83.4, 79.8, 75.3, 75.1, 72.4, 71.7, 71.4, 67.1, 65.3, 54.8, 36.9, 36.2, 26.3, 18.5 (, -3.3, -4.7; **HRMS (ESI)**: calcd for  $\text{C}_{47}\text{H}_{57}\text{NNaO}_9\text{Si}^+$   $[\text{M} + \text{Na}]^+$  830.3695, found  $m/z$  830.3704. The  $\alpha/\beta$  ratio was determined by HPLC after deprotection of picoloyl protecting group in **25** and observed as 1/9 ( $\alpha/\beta$ ). Eluent: Hexane/EtOAc = 7/3; retention time:  $\alpha$ -anomer = 10.4 min;  $\beta$ -anomer = 13.5 min (Figure S10).



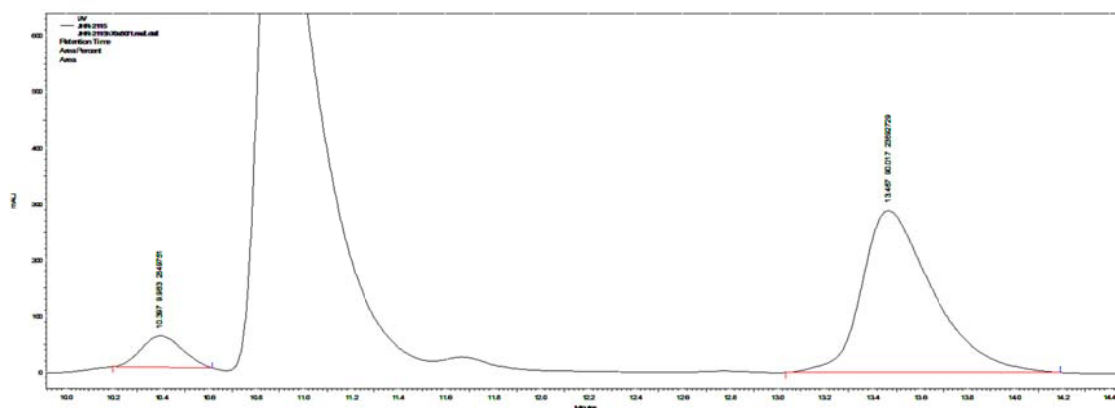

Figure S10. HPLC chromatogram of **25** after Pico deprotection.

**2.3.15** 2'-[(3,4-Bis(*tert*-butyldimethylsilyloxy)phenyl)ethyl 4-*O*-benzyl-3-*O*-(2-naphthylmethyl)-6-*O*-picoloyl-2-deoxy- $\beta$ -D-glucopyranoside (**26**)

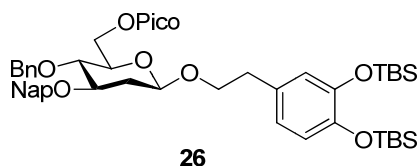

The compound **26** was synthesized by following the general glycosylation procedure (**2.1**) with glycosyl donor **8** (101 mg, 0.17 mmol), 2'-(3,4-bis(*tert*-butyldimethylsilyloxy)phenyl) ethanol **15**<sup>6</sup> (59 mg, 0.15 mmol), NIS (37 mg, 0.17 mmol), TfOH (2.9  $\mu$ L, 0.033 mmol) and activated AW300 MS (1.0 g) in  $\text{CH}_2\text{Cl}_2$  (17 mL). The reaction mixture was stirred for 24 hours at  $-50\text{ }^\circ\text{C}$ . The silica-gel column chromatography of crude residue with ethyl acetate and hexane (2:1) afforded **26** (105 mg, 79%) as a single anomer.

Analytical data for **26**:  $R_f = 0.2$  (hexane/EtOAc, 2/1, v/v);  $[\alpha]_D^{35} -1.5$  (c 4.0,  $\text{CHCl}_3$ );  $\delta_{\text{H}}$  (600 MHz,  $\text{CDCl}_3$ ,  $\text{Me}_4\text{Si}$ ): 8.73 – 8.72 (m, 1H), 8.03 (d,  $J = 8$  Hz, 1H), 7.82 – 7.72 (m, 5H), 7.48 – 7.45 (m, 3H), 7.42 – 7.39 (m, 1H), 7.31 – 7.21 (m, 5H), 6.70 (d,  $J = 8.5$  Hz, 1H), 6.67 (d,  $J = 2$  Hz, 1H), 6.59 (dd,  $J = 2$  Hz,  $J = 8$  Hz, 1H), 5.00 (d,  $J = 11$  Hz, 1H), 4.85 (d,  $J = 11.5$  Hz, 1H), 4.75 (d,  $J = 11.5$  Hz, 1H), 4.70 (d,  $J = 10.5$  Hz, 1H), 4.65 – 4.63 (m, 2H), 4.47 (dd,  $J = 1.5$  Hz,  $J = 9.5$  Hz, 1H), 4.03 – 3.99 (m, 1H), 3.76 (ddd,  $J = 5.5$  Hz,  $J = 8.5$  Hz,  $J = 11.5$  Hz, 1H), 3.66 – 3.55 (m, 3H), 2.78 – 2.75 (m, 2H), 2.40 (dd,  $J = 5$  Hz,  $J = 12.5$  Hz, 1H), 1.73 (d,

$J = 11.5$  Hz, 1H), 0.98 (s, 9H), 0.97 (s, 9H), 0.18 (s, 6H), 0.17 (s, 6H);  $\delta_C$  (150 MHz,  $CDCl_3$ ): 164.9, 150.1, 148.0, 146.6, 145.3, 138.1, 137.0, 135.7, 133.4, 133.1, 131.7, 128.5, 128.4, 128.2, 128.0, 127.9, 127.8, 126.9, 126.6, 126.3, 126.1, 125.9, 125.3, 122.0, 121.8, 120.9, 100.1, 79.6, 78.1, 75.1, 73.3, 71.7, 70.7, 65.0, 36.8, 35.7, 26.1, 18.6, 18.5, -3.93, -3.94; **HRMS (ESI)**: calcd for  $C_{50}H_{65}NNaO_8Si_2^+[M + Na]^+$  886.4141, found  $m/z$  886.4155.

**2.3.16 2'-[(3,4-Bis(*tert*-butyldimethylsilyloxy)phenyl)ethyl] 6-*O*-benzyl-3-*O*-(2-naphthylmethyl)-4-*O*-picoloyl-2-deoxy- $\alpha$ -D-glucopyranoside (26')**

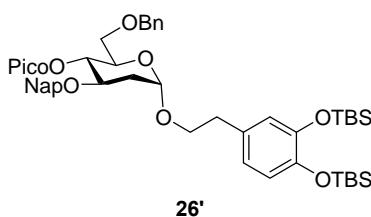

The compound **26'** was synthesized by following the general glycosylation procedure (**2.1**) with glycosyl donor **8'** (80 mg, 0.13 mmol), 2'-(3,4-bis(*tert*-butyldimethylsilyloxy)phenyl) ethanol **15**<sup>6</sup> (39 mg, 0.10 mmol), NIS (35 mg, 0.15 mmol), TfOH (2.3  $\mu$ L, 0.026 mmol) and activated AW300 MS (800 mg) in  $CH_2Cl_2$  (13 mL). The reaction mixture was stirred for 20 hours at -50 °C. The silica-gel column chromatography of crude residue with ethyl acetate and hexane (2:3 to 1:1) afforded **26'** (74 mg) as a thick gum (94% yield for  $\alpha/\beta$  10:1). Analytical data for **26'**:  $R_f = 0.5$  (hexane/EtOAc, 3/2, v/v);  $\delta_H$  (400 MHz,  $CDCl_3$ ,  $Me_4Si$ ): 8.74 – 8.73 (dq,  $J = 4.8$  Hz,  $J = 0.8$  Hz, 1H), 8.04 – 8.02 (dd,  $J = 6.8$  Hz,  $J = 0.8$  Hz, 1H), 7.82 – 7.74 (m, 5H), 7.48 – 7.41 (m, 4H), 7.28 – 7.20 (m, 5H), 6.69 – 6.67 (d,  $J = 8.0$  Hz, 1H), 6.65 (d,  $J = 2$  Hz, 1H), 6.58 – 6.56 (dd,  $J = 2.4$  Hz,  $J = 8.4$  Hz, 1H), 5.01 – 4.98 (d,  $J = 11.2$  Hz, 1H), 4.87 – 4.84 (d,  $J = 11.6$  Hz, 1H), 4.77 – 4.74 (d,  $J = 11.6$  Hz, 1H), 4.70 – 4.67 (d,  $J = 10.8$  Hz, 1H), 4.66 – 4.59 (m, 2H), 4.48 – 4.45 (dd,  $J = 9.6$  Hz,  $J = 1.6$  Hz, 1H), 4.02 – 3.96 (m, 1H), 3.76 – 3.73 (m, 1H), 3.65 – 3.52 (m, 3H), 2.76 – 2.73 (dd,  $J = 7.6$  Hz,  $J = 7.2$  Hz, 2H), 2.40 (ddd,  $J = 2$  Hz,  $J = 4.8$  Hz,  $J = 12.4$  Hz, 1H), 1.75 – 1.67 (m, 1H), 0.97 (s, 9H), 0.96 (s, 9H), 0.17 (s, 6H), 0.15 (s, 6H);  $\delta_C$  (100 MHz,  $CDCl_3$ ): 164.7, 149.9, 147.8, 146.4,

145.1, 137.9, 136.8, 135.5, 133.2, 133.0, 128.0, 127.8, 127.7, 127.6, 126.5, 126.1, 125.9, 125.7, 125.1, 121.8, 121.6, 120.7, 99.9, 79.4, 77.9, 75.0, 73.1, 71.5, 70.5, 64.8, 36.6, 35.5, 25.9, 18.4, 18.4, -4.0.  $\alpha/\beta$  Ratio of 26' was determined by isolation.

### 2.3.17 4-*O*-Benzoyl-6-*O*-picoloyl-2,3-dideoxy- $\beta$ -D-glucopyranosyl-(1 $\rightarrow$ 6)-1,2,3,4-di-*O*-isopropylidene- $\alpha$ -D-galactopyranoside (**27**)

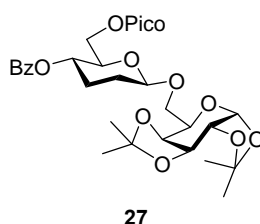

The compound **27** was synthesized by following the general glycosylation procedure (**2.1**) with glycosyl donor **9** (60 mg, 0.12 mmol), 1,2:3,4-di-*O*-isopropylidene- $\alpha$ -D-galactopyranose **3** (26 mg, 0.10 mmol), NIS (27 mg, 0.12 mmol), TfOH (1.7  $\mu$ L, 0.02 mmol) and activated AW300 MS (600 mg) in  $\text{CH}_2\text{Cl}_2$  (12 mL). The reaction mixture was stirred for 3 hours at  $-50^\circ\text{C}$ . The silica-gel column chromatography of crude residue with mixture of EtOAc,  $\text{CH}_2\text{Cl}_2$ , and hexane (2:1:1) afforded **27** (36 mg, 60%) as a single anomer.

Analytical data for **27**:  $R_f = 0.3$  (hexane/EtOAc/ $\text{CH}_2\text{Cl}_2$ , 1/1/1, v/v);  $[\alpha]_{\text{D}}^{35} -20.1$  (c 1.3,  $\text{CHCl}_3$ );  $\delta_{\text{H}}$  (600 MHz,  $\text{CDCl}_3$ ,  $\text{Me}_4\text{Si}$ ): 8.72 – 8.72 (m, 1H), 8.08 (d,  $J = 7.8$  Hz, 1H), 7.99 (d,  $J = 7.2$  Hz, 2H), 7.80 – 7.77 (m, 1H), 7.55 – 7.52 (m, 1H), 7.45 – 7.43 (m, 1H), 7.41 – 7.38 (m, 2H), 5.54 (d,  $J = 5.4$  Hz, 1H), 5.06 (dd,  $J = 4.8$  Hz,  $J = 9$  Hz, 1H), 4.74 (dd,  $J = 1.8$  Hz,  $J = 8.4$  Hz, 1H), 4.64 (dd,  $J = 4.2$  Hz,  $J = 12$  Hz, 1H), 4.58 (dd,  $J = 6$  Hz,  $J = 12$  Hz, 1H), 4.56 (dd,  $J = 1.2$  Hz,  $J = 7.8$  Hz, 1H), 4.30 (dd,  $J = 2.4$  Hz,  $J = 4.8$  Hz, 1H), 4.19 (dd,  $J = 1.2$  Hz,  $J = 7.8$  Hz, 1H), 4.09 (ddd,  $J = 4.2$  Hz,  $J = 6$  Hz,  $J = 9$  Hz, 1H), 4.04 – 4.00 (m, 2H), 3.74 – 3.71 (m, 1H), 2.38 (dd,  $J = 4.2$  Hz,  $J = 12.6$  Hz, 1H), 2.07 – 2.05 (m, 1H, H-2'<sub>eq</sub>), 1.82 – 1.69 (m, 2H), 1.54 (s, 3H), 1.42 (s, 3H), 1.33 (s, 3H), 1.31 (s, 3H);  $\delta_{\text{C}}$  (150 MHz,  $\text{CDCl}_3$ ): 165.7, 164.9, 150.0, 147.9, 137.1, 133.3, 130.0, 129.8, 128.5, 127.0, 125.5, 109.5, 108.8,

102.1, 96.5, 74.9, 71.6, 70.9, 70.6, 69.0, 68.7, 68.1, 65.4, 29.5, 26.8, 26.2, 26.1, 25.1, 24.6;

**HRMS (ESI):** calcd for  $C_{31}H_{37}NNaO_{11}^+[M + Na]^+$  622.2259, found  $m/z$  622.2262.

**2.3.18 4-O-Benzoyl-6-O-picoloyl-2,3-dideoxy- $\beta$ -D-glucopyranosyl-(1 $\rightarrow$ 4)-3-O-(2-naphthyl methyl)-2,6-di-deoxy- $\alpha$ -D-glucopyranoside (**28**)**

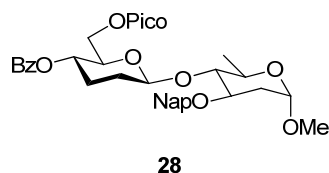

The compound **28** was synthesized by following the general glycosylation procedure (**2.1**) with glycosyl donor **9** (120 mg, 0.25 mmol), methyl 3-O-(2-naphthylmethyl)-2,6-dideoxy- $\alpha$ -D-glucopyranoside **11** (54 mg, 0.18 mmol), NIS (56 mg, 0.25 mmol), TfOH (4.42  $\mu$ L, 0.05 mmol) and activated AW300 MS (1.2 g) in  $CH_2Cl_2$  (25 mL). The reaction mixture was stirred for 22 hours at  $-50$   $^{\circ}C$ . The silica-gel column chromatography of crude residue with mixture of ethyl acetate and hexane (1:2) afforded **28** (63 mg, 55%) as anomeric mixture with 1:2 ( $\alpha$ : $\beta$ ).

Analytical data for **28**:  $R_f$  = 0.2 (hexane/EtOAc, 3/2, v/v);  $[\alpha]_D^{35}$  79.0 (c 0.41,  $CHCl_3$ );  $\delta_H$  (600 MHz,  $CDCl_3$ ,  $Me_4Si$ ): 8.59 - 8.58 (m, 1H), 7.95 (d,  $J$  = 7.8 Hz, 2H), 7.91 (d,  $J$  = 7.8 Hz, 1H), 7.78 - 7.73 (m, 4H), 7.58 - 7.52 (m, 2H), 7.46 (d,  $J$  = 8.4 Hz, 1H), 7.43 - 7.37 (m, 4H), 7.29-7.27 (m, 1H), 5.01 (dd,  $J$  = 4.8 Hz,  $J$  = 10.2 Hz, 1H), 4.95 (d,  $J$  = 12 Hz, 1H), 4.88 (d,  $J$  = 8.4 Hz, 1H), 4.77 (d,  $J$  = 12.6 Hz, 1H), 4.70 (d,  $J$  = 2.4 Hz, 1H), 4.57 (dd,  $J$  = 3 Hz,  $J$  = 12 Hz, 1H), 4.45 (dd,  $J$  = 5.4 Hz,  $J$  = 11.4 Hz, 1H), 3.97 - 3.91 (m, 2H), 3.72 (dd,  $J$  = 6.6 Hz,  $J$  = 9 Hz, 1H), 3.40 (d,  $J$  = 9 Hz, 1H), 3.26 (s, 3H), 2.39 (dd,  $J$  = 4.8 Hz,  $J$  = 12.6 Hz, 1H), 2.19 (dd,  $J$  = 4.8 Hz,  $J$  = 13.2 Hz, 1H), 2.02 (d,  $J$  = 13.8 Hz, 1H), 1.79 (ddd,  $J$  = 4.2 Hz,  $J$  = 9.6 Hz,  $J$  = 13.8 Hz, 1H), 1.72 - 1.60 (m, 2H), 1.30 (d,  $J$  = 6 Hz, 3H);  $\delta_C$  (150 MHz,  $CDCl_3$ ): 165.7, 164.8, 149.9, 147.7, 136.89, 136.86, 133.42, 133.37, 133.0, 129.93, 129.89, 128.6, 128.1, 128.0, 127.9, 126.8, 126.2, 126.1, 126.0, 125.8, 125.4, 102.3, 98.3, 83.7, 75.4, 72.3,

68.8, 67.0, 65.3, 54.7, 36.1, 30.3, 27.7, 18.4; **HRMS (ESI)**: calcd for  $C_{37}H_{39}NNaO_9^+$  [ $M + Na$ ] $^+$  664.2517, found  $m/z$  664.2525.

The  $\alpha/\beta$  ratio of **28** was determined to be 1/2 by HPLC after deprotection of Picolinoyl-group; Eluent: Hexane/EtOAc = 13/7; retention time:  $\alpha$  anomer = 20.2 min;  $\beta$  anomer = 16 min (Figure S11).

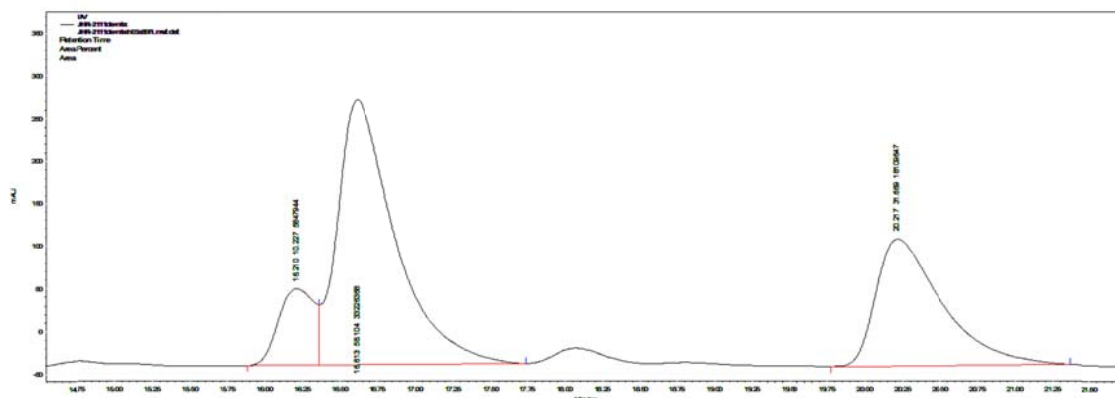

**Figure S11.** HPLC chromatogram of **28** after Pico deprotection.

## 2.4 Synthesis of deoxytrisaccharide 29

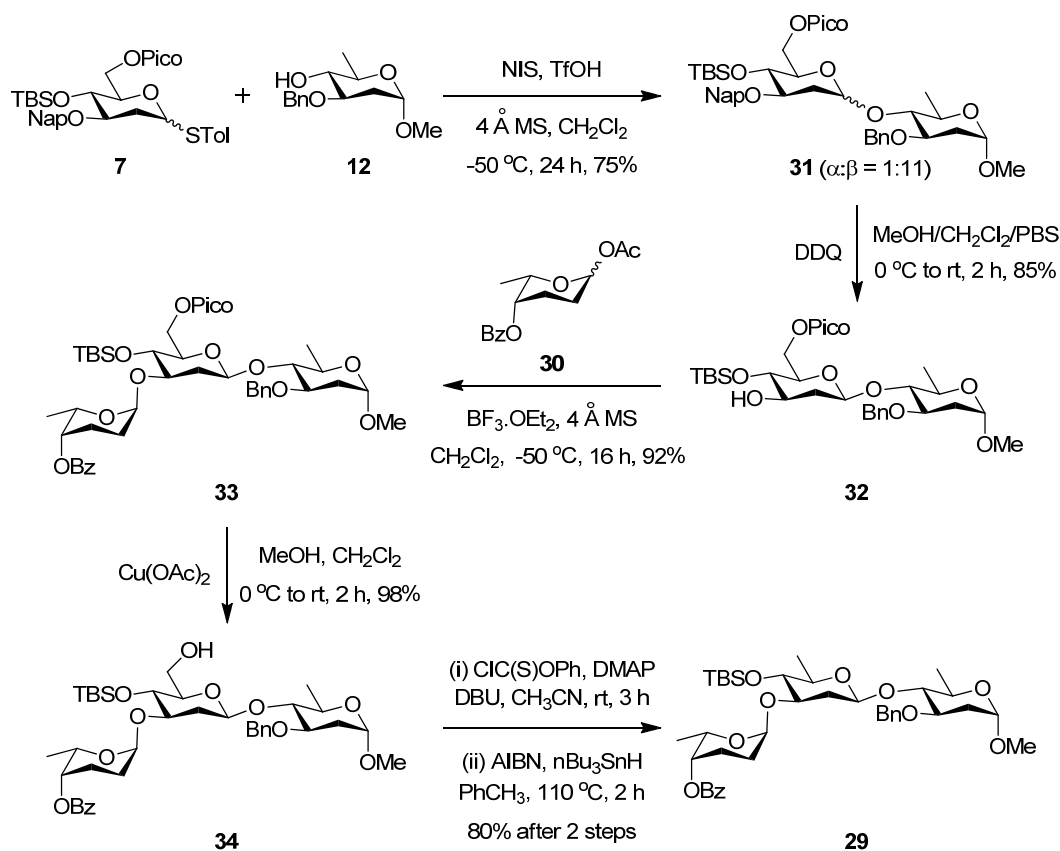

Scheme S1: Synthesis of trisaccharide derivative

### 2.4.1 Methyl 4-*O*-(*tert*-Butyldimethylsilyl)-3-*O*-(2-naphthylmethyl)-6-*O*-picoloyl-2-deoxy- $\alpha$ -D-glucopyranosyl-(1 $\rightarrow$ 4)-3-*O*-benzyl-2,6-dideoxy- $\alpha$ -D-glucopyranoside (31)

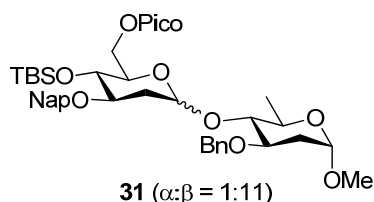

The compound **31** was synthesized by following the general glycosylation procedure (2.1) with glycosyl donor **7** (810 mg, 1.28 mmol), methyl 3-*O*-benzyl-2,6-dideoxy- $\alpha$ -D-glucopyranoside **12** (250 mg, 0.99 mmol), NIS (347 mg, 1.54 mmol), TfOH (22.7  $\mu$ L, 0.257 mmol) and activated AW300 MS (8.0 g) in  $\text{CH}_2\text{Cl}_2$  (128 mL). The reaction mixture was stirred for 48 hours at  $-50\text{ °C}$ . The silica-gel column chromatography of crude product with

ethyl acetate in hexane (2:3 to 1:1) gave **31** (562 mg, 75%) as a inseparable mixture with 1:11 ( $\alpha$ : $\beta$ ). The  $\alpha$ / $\beta$  ratio was determined by HPLC after deprotection of Picoloyl protecting group in **31** and observed as 1/11 ( $\alpha$ / $\beta$ ). Eluent: Hexane/EtOAc = 7/3; retention time:  $\alpha$ -anomer = 14.5 min;  $\beta$ -anomer = 21.8 min (Figure S12).

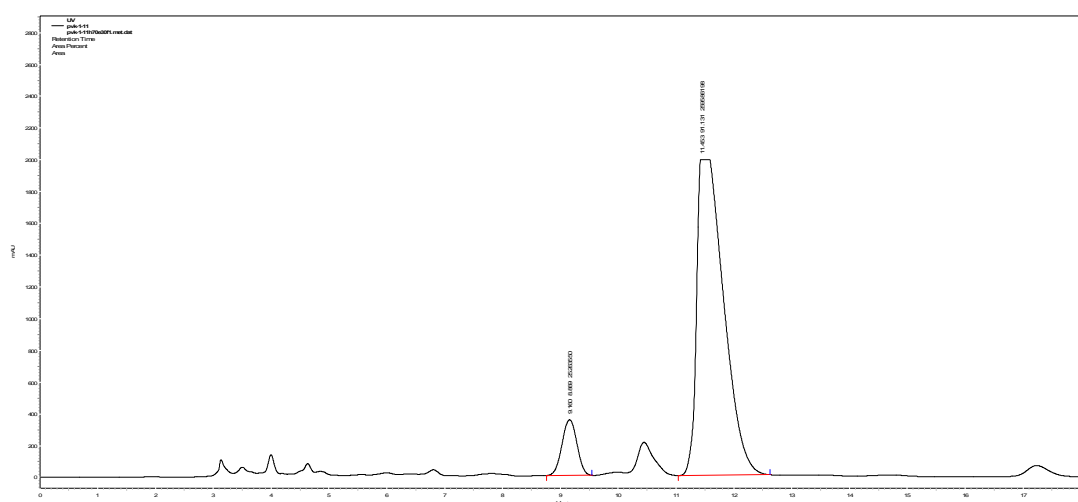

**Figure S12.** HPLC chromatogram of **31** after Pico deprotection.

#### 2.4.2 Methyl 4-*O*-(*tert*-Butyldimethylsilyl)-6-*O*-picoloyl-2-deoxy- $\beta$ -D-glucopyranosyl-(1 $\rightarrow$ 4)-3-*O*-benzyl-2,6-dideoxy- $\alpha$ -D-glucopyranoside (**32**)

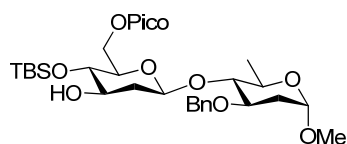

**32**

To the stirred solution of **31** (530 mg, 0.69 mmol) in 30 mL of mixture of (8:1:1)  $\text{CH}_2\text{Cl}_2$ :MeOH:PBS (phosphate buffered saline), was added 2,3-dichloro-5,6-dicyano-1,4-benzoquinone (317 mg, 1.39 mmol) at 0 °C. Then the reaction was warmed to room temperature and stirred for 2 hours. After completion of the reaction, the mixture was diluted with  $\text{CH}_2\text{Cl}_2$  (150 mL), washed with satd.  $\text{NaHCO}_3$  (100 mL), 10%  $\text{Na}_2\text{S}_2\text{O}_3(\text{aq})$  (100 mL), brine (100 mL) and dried ( $\text{Na}_2\text{SO}_4$ ). The crude product was purified by silica-gel column chromatography with (3:2) ethyl acetate in hexane to get **32** ( $\beta$ , 336 mg) along with other anomer ( $\alpha$ , 30 mg) as separate products.

Analytical data for **32**:  $R_f = 0.5$  (EtOAc/hexane, 1/1, v/v);  $\delta_H$  (400 MHz,  $CDCl_3$ ,  $Me_4Si$ ): 8.69 – 8.67 (dq,  $J = 4.8$  Hz,  $J = 0.8$  Hz, 1H), 8.03 – 8.00 (dt,  $J = 7.6$  Hz,  $J = 0.8$  Hz, 1H), 7.73 – 7.68 (td,  $J = 8.0$  Hz,  $J = 2.0$  Hz, 1H), 7.40 – 7.37 (ddd,  $J = 7.6$  Hz,  $J = 4.8$  Hz,  $J = 1.2$  Hz, 1H), 7.29 – 7.25 (m, 2H), 7.22 – 7.13 (m, 3H), 4.82 – 4.79 (dd,  $J = 9.6$  Hz,  $J = 2.0$  Hz, 1H), 4.75 – 4.72 (d,  $J = 12.0$  Hz, 1H), 4.67 – 4.66 (d,  $J = 2.4$  Hz, 1H), 4.65 – 4.61 (dd,  $J = 11.6$  Hz,  $J = 2.0$  Hz, 1H), 4.57 – 4.54 (d,  $J = 12.0$  Hz, 1H), 4.42 – 4.37 (dd,  $J = 12.0$  Hz,  $J = 5.6$  Hz, 1H), 3.86 – 3.80 (ddd,  $J = 13.6$  Hz,  $J = 8.4$  Hz,  $J = 5.2$  Hz, 1H), 3.71 – 3.66 (m, 2H), 3.56 – 3.52 (t,  $J = 8.8$  Hz, 1H), 3.49 – 3.45 (ddd,  $J = 9.2$  Hz,  $J = 5.2$  Hz,  $J = 2.0$  Hz, 1H), 3.33 – 3.29 (t,  $J = 18.0$  Hz, 1H), 3.24 (s, 3H), 2.33 (bs, 1H), 2.28 – 2.23 (ddd,  $J = 12.4$  Hz,  $J = 4.8$  Hz,  $J = 1.6$  Hz, 1H), 2.16 – 2.11 (ddd,  $J = 13.2$  Hz,  $J = 5.2$  Hz,  $J = 1.2$  Hz, 1H), 1.72 – 1.57 (m, 2H), 1.26 – 1.24 (d,  $J = 6.4$  Hz, 3H), 0.88 (s, 9H), 0.14 (s, 3H), 0.06 (s, 3H);  $\delta_C$  (100 MHz,  $CDCl_3$ ): 164.5, 149.6, 147.6, 138.9, 136.6, 127.9, 127.2, 127.0, 126.6, 125.0, 100.0, 97.8, 83.2, 74.8, 74.2, 73.1, 71.9, 71.7, 66.5, 64.7, 54.3, 38.9, 35.6, 25.7, 18.1, 18.0, -3.8, -4.9; HRMS (ESI): calcd for  $C_{32}H_{47}NNaO_9Si^+$   $[M + Na]^+$  640.2918, found  $m/z$  640.2910.

### 2.4.3 Compound 33

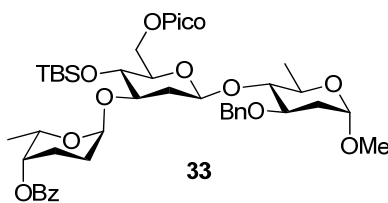

To the stirred solution of 4-*O*-benzoyl-L-rhodinosyl acetate **30**<sup>7</sup> (270 mg, 0.97 mmol), glycosyl acceptor **32** (300 mg, 0.48 mmol) and activated AW300 MS (2.7 g) in  $CH_2Cl_2$  (45 mL), boron trifluoride diethyl etherate ( $BF_3 \cdot OEt_2$ ) (150  $\mu$ L, 1.20 mmol) was added at  $-50$  °C. The resulting mixture was stirred for 16 hours at same temperature. Then, the reaction was quenched with  $Et_3N$  (2 mL) and warmed to room temperature. Filtered the solution through the celite pad which was washed thoroughly with  $CH_2Cl_2$  (150 mL). The organic layer was



washed with saturated NaHCO<sub>3</sub> solution (75 mL), water (75 mL), brine (50 mL) and dried over Na<sub>2</sub>SO<sub>4</sub>. The flash silica-gel chromatography with 2:3 ethyl acetate in hexane provided **33** (373 mg, 92%) as a colorless oil.

Analytical data for **33**:  $R_f = 0.2$  (EtOAc/hexane, 3/7, v/v);  $\delta_H$  (400 MHz, CDCl<sub>3</sub>, Me<sub>4</sub>Si): 8.69 – 8.68 (dq,  $J = 4.4$  Hz,  $J = 0.4$  Hz, 1H), 8.13 – 8.11 (m, 2H), 8.05 – 8.03 (d,  $J = 7.6$  Hz, 1H), 7.74 – 7.70 (td,  $J = 7.6$  Hz,  $J = 1.6$  Hz, 1H), 7.58 – 7.55 (m, 1H), 7.48 – 7.44 (m, 2H), 7.41 – 7.38 (ddd,  $J = 7.6$  Hz,  $J = 4.8$  Hz,  $J = 1.2$  Hz, 1H), 7.28 – 7.15 (m, 5H), 5.14 – 5.13 (d,  $J = 3.2$  Hz, 1H), 5.04 (s, 1H), 4.85 – 4.82 (dd,  $J = 9.6$  Hz,  $J = 2.0$  Hz, 1H), 4.74 – 4.67 (m, 3H), 4.57 – 4.54 (d,  $J = 12.0$  Hz, 1H), 4.37 – 4.32 (dd,  $J = 11.6$  Hz,  $J = 6.0$  Hz, 1H), 4.23 – 4.18 (ddd,  $J = 12.8$  Hz,  $J = 6.4$  Hz,  $J = 0.8$  Hz, 1H), 3.86 – 3.80 (ddd,  $J = 13.6$  Hz,  $J = 8.4$  Hz,  $J = 5.2$  Hz, 1H), 3.76 – 3.64 (m, 3H), 3.56 – 3.52 (ddd,  $J = 8.8$  Hz,  $J = 6.0$  Hz,  $J = 2.4$  Hz, 1H), 3.35 – 3.31 (t,  $J = 8.8$  Hz, 1H), 3.24 (s, 3H), 2.55 – 2.50 (ddd,  $J = 12.8$  Hz,  $J = 4.4$  Hz,  $J = 2.4$  Hz, 1H), 2.30 – 2.23 (m, 2H), 2.16 – 2.11 (ddd,  $J = 15.2$  Hz,  $J = 4.8$  Hz,  $J = 1.2$  Hz, 1H), 2.09 – 2.00 (m, 1H), 1.95 – 1.89 (m, 1H), 1.63 – 1.47 (m, 2H), 1.26 – 1.24 (d,  $J = 6.4$  Hz, 3H), 1.19 – 1.18 (d,  $J = 6.8$  Hz, 3H), 0.90 (s, 9H), 0.18 (s, 3H), 0.08 (s, 3H);  $\delta_C$  (100 MHz, CDCl<sub>3</sub>): 166.0, 164.7, 149.7, 147.8, 139.0, 136.6, 132.9, 136.6, 132.9, 130.2, 129.6, 128.3, 128.0, 127.3, 127.1, 126.6, 125.0, 99.9, 97.9, 91.3, 82.9, 74.9, 74.8, 73.2, 71.8, 70.9, 69.7, 66.6, 65.2, 64.8, 54.3, 35.7, 34.6, 25.7, 23.8, 22.9, 18.1, 17.9, 17.1, -3.3, -4.4; HRMS (ESI): calcd for C<sub>45</sub>H<sub>61</sub>NNaO<sub>12</sub>Si<sup>+</sup> [M + Na]<sup>+</sup> 858.3861, found  $m/z$  858.3855.

#### 2.4.4 Compound 34

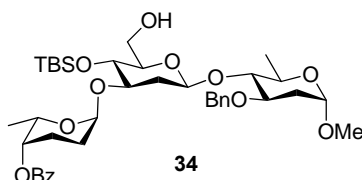

Copper(II) acetate monohydrate (Cu(OAc)<sub>2</sub>·H<sub>2</sub>O) (163 mg, 0.82 mmol) was added to the stirred solution of **33** (350 mg, 0.41 mmol) in CH<sub>2</sub>Cl<sub>2</sub>/MeOH (20:1, 21 mL) at 0 °C. The

resulted solution was stirred for 2 hours at ambient temperature, quenched with saturated  $\text{NH}_4\text{Cl}$  solution (5 mL), filtered through the celite pad and washed the pad with  $\text{CH}_2\text{Cl}_2$  (150 mL). The filtrate was washed with saturated  $\text{NaHCO}_3$  solution (75 mL), water (75 mL), brine (75 mL) and dried over  $\text{Na}_2\text{SO}_4$ . The crude residue was purified by silica-gel column chromatography with ethyl acetate in hexane (2:3) to afford **34** (299 mg, 98%) as a thick gum.

Analytical data for **34**:  $R_f = 0.4$  (EtOAc/hexane, 3/7, v/v);  $\delta_{\text{H}}$  (400 MHz,  $\text{CDCl}_3$ ,  $\text{Me}_4\text{Si}$ ): 8.12 – 8.10 (m, 2H), 7.59 – 7.55 (tt,  $J = 6.8$  Hz,  $J = 1.2$  Hz, 1H), 7.47 – 7.43 (m, 2H), 7.38 – 7.32 (m, 4H), 7.29 – 7.25 (m, 1H), 5.15 – 5.14 (d,  $J = 3.2$  Hz, 1H), 5.04 (s, 1H), 4.74 – 4.67 (m, 3H), 4.63 – 4.60 (d,  $J = 11.6$  Hz, 1H), 4.23 – 4.18 (ddd,  $J = 12.8$  Hz,  $J = 6.0$  Hz,  $J = 1.2$  Hz, 1H), 3.85 – 3.78 (m, 1H), 3.74 – 3.65 (m, 3H), 3.48 – 3.44 (t,  $J = 8.8$  Hz, 1H), 3.43 – 3.39 (dd,  $J = 11.6$  Hz,  $J = 7.2$  Hz, 1H), 3.34 – 3.30 (t,  $J = 9.2$  Hz, 1H), 3.29 (s, 3H), 3.22 – 3.17 (ddd,  $J = 9.2$  Hz,  $J = 6.8$  Hz,  $J = 2.8$  Hz, 1H), 2.54 – 2.49 (ddd,  $J = 12.4$  Hz,  $J = 4.4$  Hz,  $J = 2.0$  Hz, 1H), 2.30 – 2.21 (m, 2H), 2.09 – 2.00 (tt,  $J = 14.0$  Hz,  $J = 4.4$  Hz, 1H), 1.95 – 1.89 (dq,  $J = 14.0$  Hz,  $J = 2.8$  Hz, 1H), 1.70 – 1.63 (ddd,  $J = 13.2$  Hz,  $J = 11.2$  Hz,  $J = 3.6$  Hz, 1H), 1.58 – 1.55 (m, 1H), 1.48 – 1.40 (m, 1H), 1.27 – 1.25 (d,  $J = 6.0$  Hz, 3H), 1.18 – 1.17 (d,  $J = 6.4$  Hz, 3H), 0.89 (s, 9H), 0.16 (s, 3H), 0.10 (s, 3H);  $\delta_{\text{C}}$  (100 MHz,  $\text{CDCl}_3$ ): 166.0, 138.8, 133.0, 130.2, 129.6, 128.3, 128.2, 127.5, 127.4, 100.1, 98.1, 91.3, 83.6, 76.6, 74.8, 73.2, 72.1, 71.2, 69.7, 66.8, 65.1, 62.4, 54.5, 35.9, 34.8, 25.8, 23.8, 22.9, 18.0, 17.9, 17.1, -3.3, -4.3; HRMS (ESI): calcd for  $\text{C}_{39}\text{H}_{58}\text{NaO}_{11}\text{Si}^+$  [ $\text{M} + \text{Na}$ ] $^+$  753.3646, found  $m/z$  753.3648.

#### 2.4.5 Compound 29

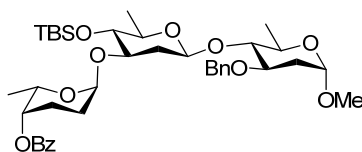

**29**

To the stirred solution of **34** (200 mg, 0.27 mmol) in acetonitrile ( $\text{CH}_3\text{CN}$ ) (8 mL), was

added DBU (80  $\mu$ L, 0.54 mmol) and DMAP (66 mg, 0.54 mmol) at 0 °C. After 5 min, *O*-phenyl chlorothionoformate (74  $\mu$ L, 0.54 mmol) was also added to the reaction mixture in a dropwise fashion at 0 °C and stirred for 2 hours at room temperature. After completion of the reaction, the mixture was quenched with saturated NH<sub>4</sub>Cl solution (5 mL), extracted with EtOAc (75 mL  $\times$  2), washed with water (75 mL), brine (75 mL) and dried over Na<sub>2</sub>SO<sub>4</sub>. The crude product was purified by flash column chromatography to get trisaccharide derived thionocarbonate (201 mg, 0.23 mmol) which was dissolved in toluene (10 mL). To the resulting mixture, tributyltin hydride (132  $\mu$ L, 0.46 mmol) and azobisisobutyronitrile AIBN (37 mg, 0.23 mmol) was added. The solution was degassed for three times under *vacuo* and refluxed for 2 hours at 110 °C under nitrogen condition. After completion of the reaction, the solution was cooled to room temperature, concentrated and purified by column chromatography using silica-gel (2:3 ethyl acetate in hexane) to afford **29** (156 mg, 80% after two steps) as a thick gum.

Analytical data for **29**:  $R_f$  = 0.5 (EtOAc/hexane, 1/4, v/v);  $[\alpha]_D^{20}$  = +12.2 (c 0.98, CHCl<sub>3</sub>);  $\delta_H$  (400 MHz, CDCl<sub>3</sub>, Me<sub>4</sub>Si): 8.13 – 8.10 (m, 2H), 7.59 – 7.55 (m, 1H), 7.47 – 7.43 (m, 2H), 7.38 – 7.23 (m, 5H), 5.12 (d,  $J$  = 2.8 Hz, 1H), 5.03 (s, 1H), 4.78 – 4.71 (m, 3H), 4.61 – 4.58 (d,  $J$  = 11.2 Hz, 1H), 4.22 – 4.17 (dd,  $J$  = 12.4 Hz,  $J$  = 6.0 Hz, 1H), 3.88 – 3.82 (m, 1H), 3.72 – 3.59 (m, 2H), 3.34 – 3.19 (m, 5H), 2.50 – 2.47 (ddd,  $J$  = 12.0 Hz,  $J$  = 4.4 Hz,  $J$  = 2.0 Hz, 1H), 2.31 – 2.18 (m, 2H), 2.09 – 2.00 (tt,  $J$  = 14.0 Hz,  $J$  = 4.4 Hz, 1H), 1.95 – 1.89 (dq,  $J$  = 14.0 Hz,  $J$  = 2.8 Hz, 1H), 1.72 – 1.65 (ddd,  $J$  = 13.2 Hz,  $J$  = 11.2 Hz,  $J$  = 3.6 Hz, 1H), 1.57 – 1.54 (m, 1H), 1.44 – 1.36 (m, 1H), 1.28 – 1.26 (d,  $J$  = 6.4 Hz, 3H), 1.24 – 1.22 (d,  $J$  = 6.0 Hz, 3H), 1.17 – 1.15 (d,  $J$  = 6.4 Hz, 3H), 0.91 (s, 9H), 0.16 (s, 3H), 0.11 (s, 3H);  $\delta_C$  (100 MHz, CDCl<sub>3</sub>): 166.1, 139.0, 133.0, 130.3, 129.6, 128.3, 128.1, 127.5, 127.3, 100.1, 98.1, 91.2, 83.0, 75.9, 75.7, 73.0, 73.0, 72.1, 69.9, 66.7, 65.0, 54.4, 35.7, 35.2, 25.9, 23.9, 22.9, 18.8, 18.2, 18.0, 17.1, -3.1, -3.5; HRMS (ESI): calcd for C<sub>39</sub>H<sub>58</sub>NaO<sub>10</sub>Si<sup>+</sup> [M + Na]<sup>+</sup> 737.3697, found  $m/z$  737.3698.

## References:

1. J-H. Chen, J-H. Ruei and K-K. T. Mong, *Eur. J. Org. Chem.*, 2014, 1827–1831.
2. C-W T. Chang, T. Clark and M. Ngaara, *Tetrahedron Lett.*, 2001, **42**, 6797–6801.
3. S. C. Timmons and D. L. Jakeman, *Carbohydr. Res.*, 2007, **342**, 2695–2704.
4. O. Kjolberg and K. Neumann, *Acta Chem. Scand.*, 1993, **47**, 721–727
5. S. D. Debenham and E. J. Toone, *Tetrahedron: Asymmetry*, 2000, **11**, 385–387.
6. H. I. Duynstee, M. C. de Koning, H. Ovaa, G. A. van der Marel, and Jacques H. van Boom, *Eur. J. Org. Chem.*, 1999, 2623–2632.
7. X. Yang, B. Fu and B. Yu, *J. Am. Chem. Soc.*, 2011, **133**, 12433–12435.

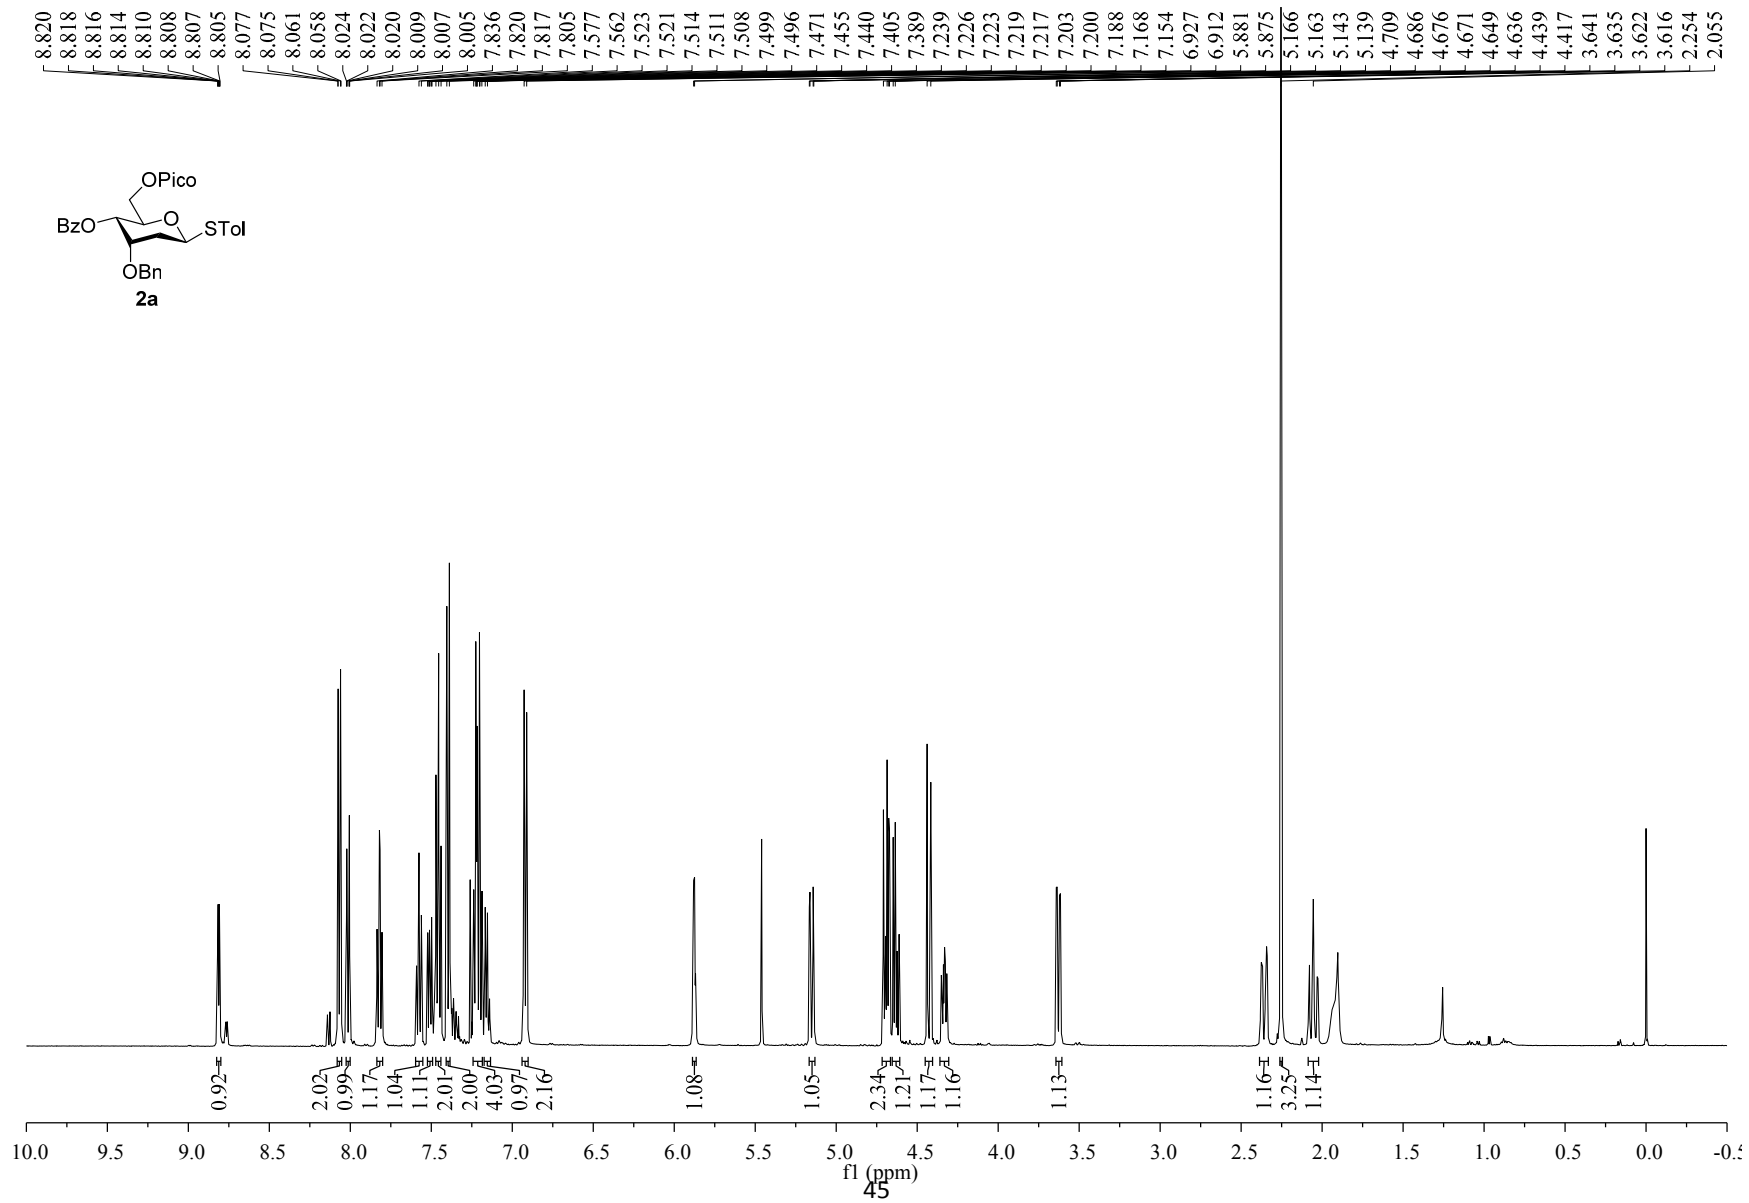

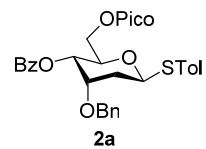

165.825  
164.863

150.085  
148.170  
137.874  
137.242  
137.019  
133.463  
132.969  
129.969  
129.648  
128.678  
128.582  
128.370  
128.088  
127.002  
125.500

80.470  
74.174  
73.187  
71.102  
66.496  
65.390

36.074

21.317

<sup>13</sup>C-nondecoupling:  
 $J_{CH} = 156.4 \text{ Hz}$

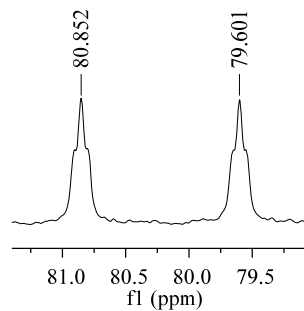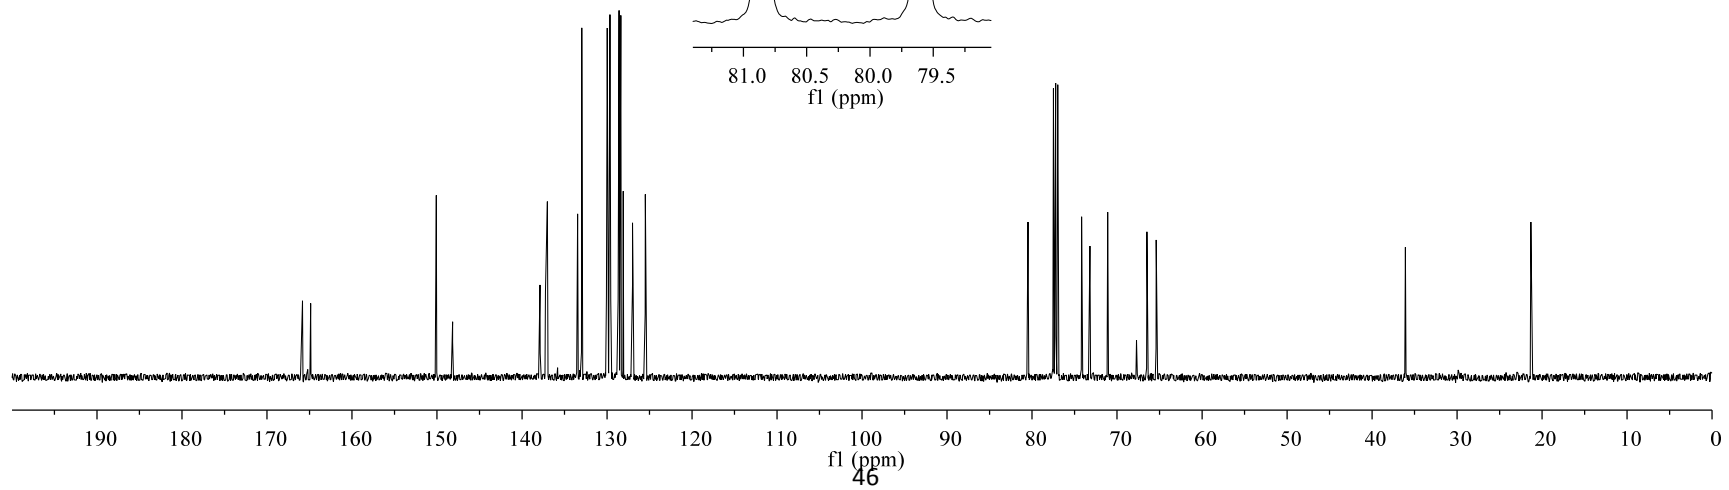

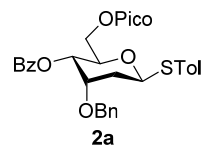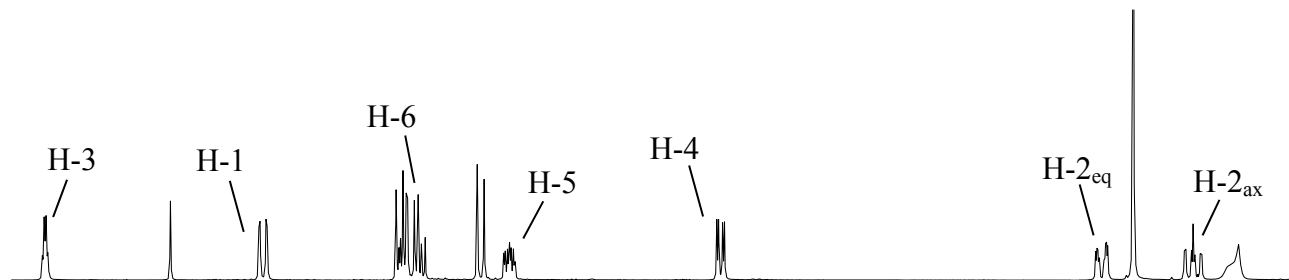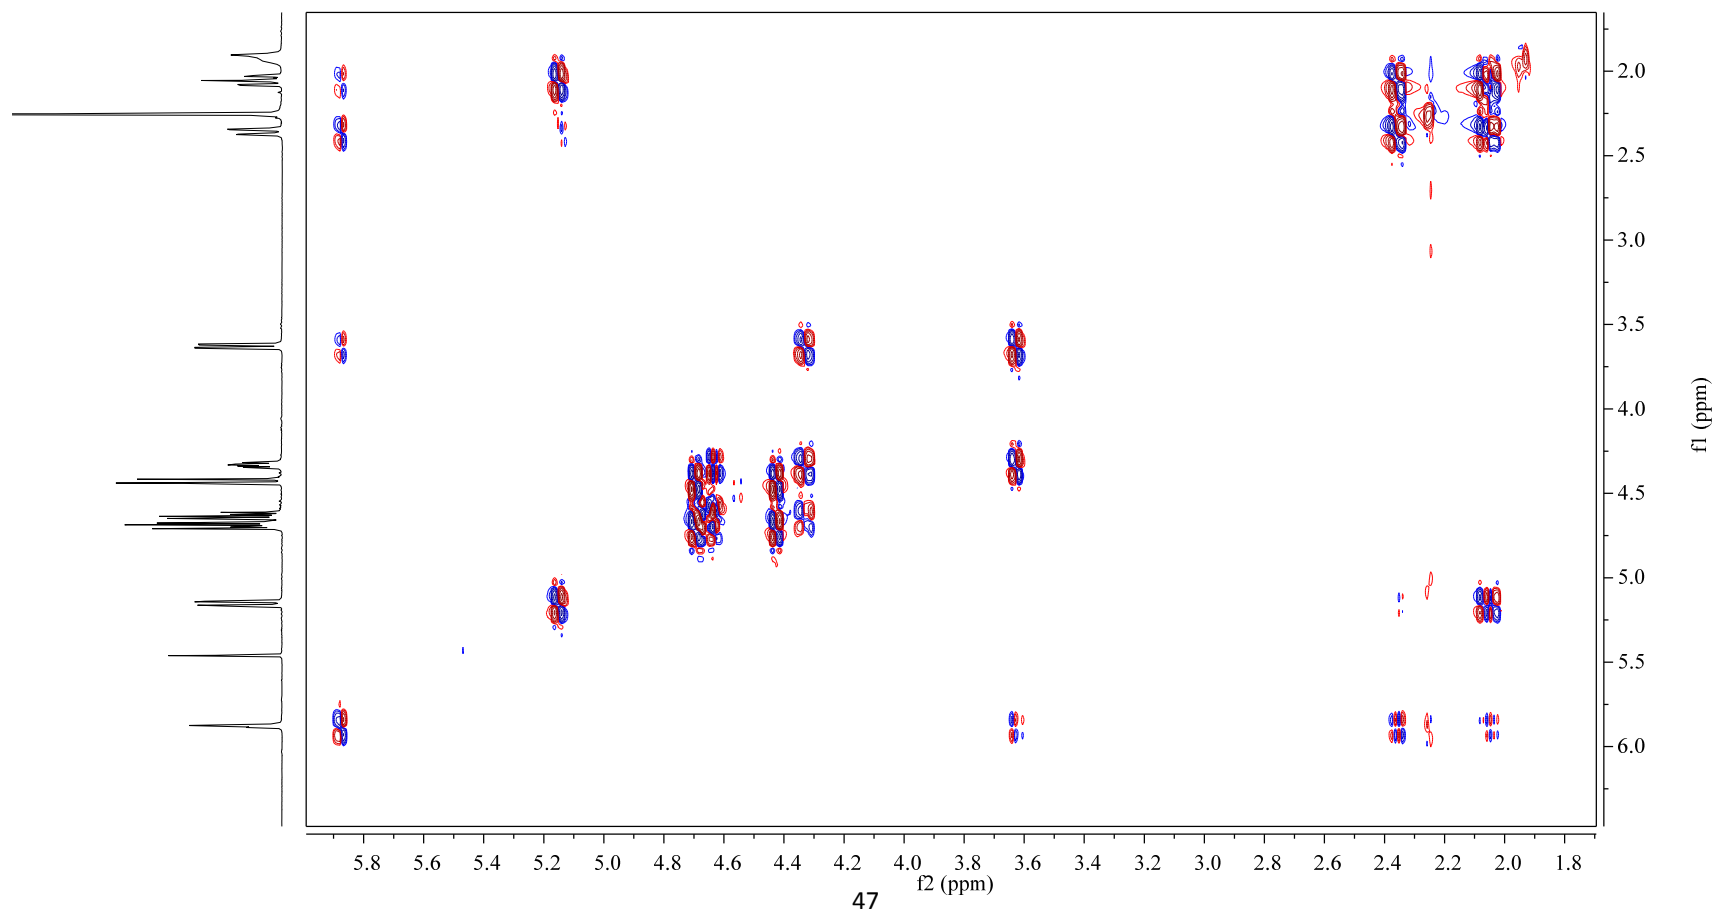

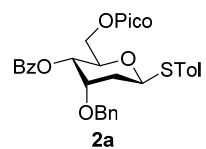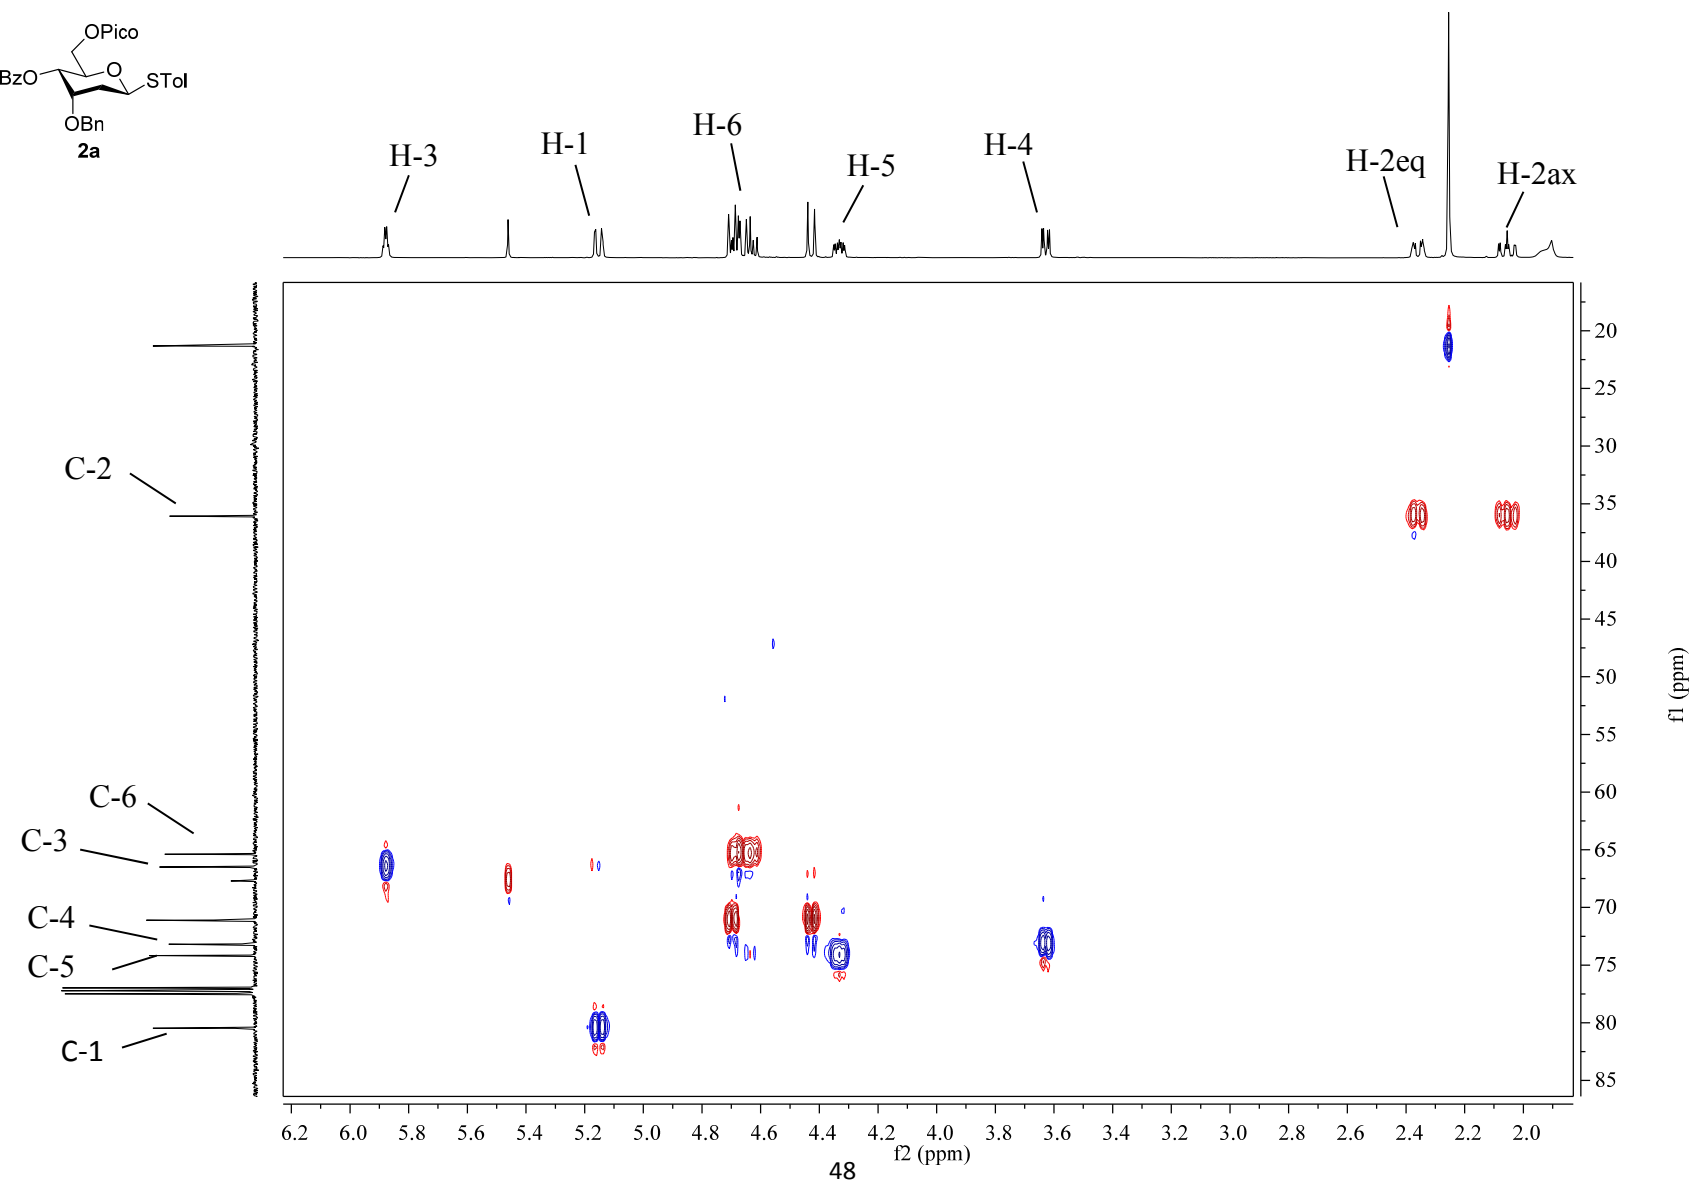



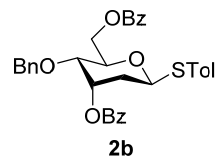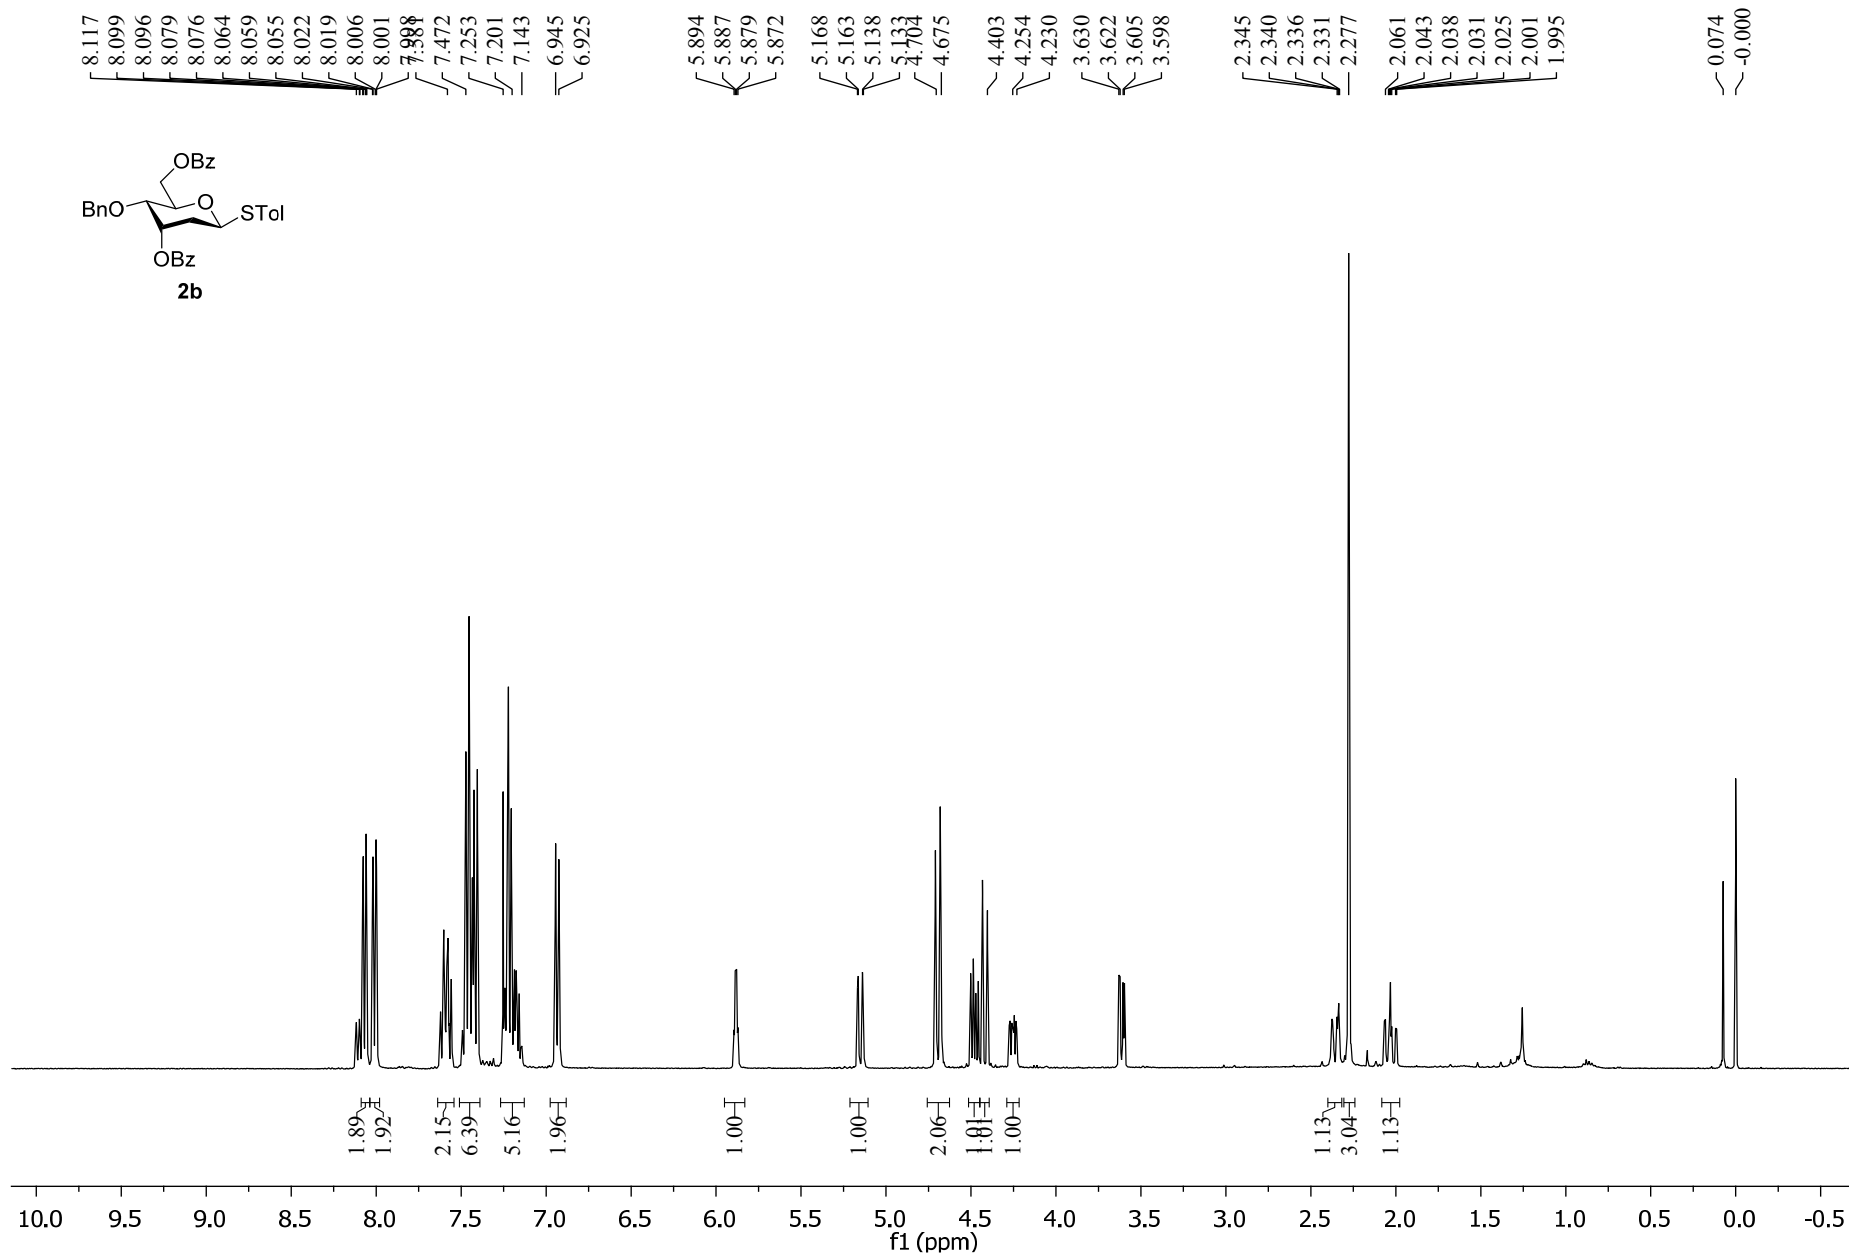

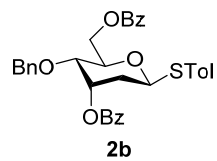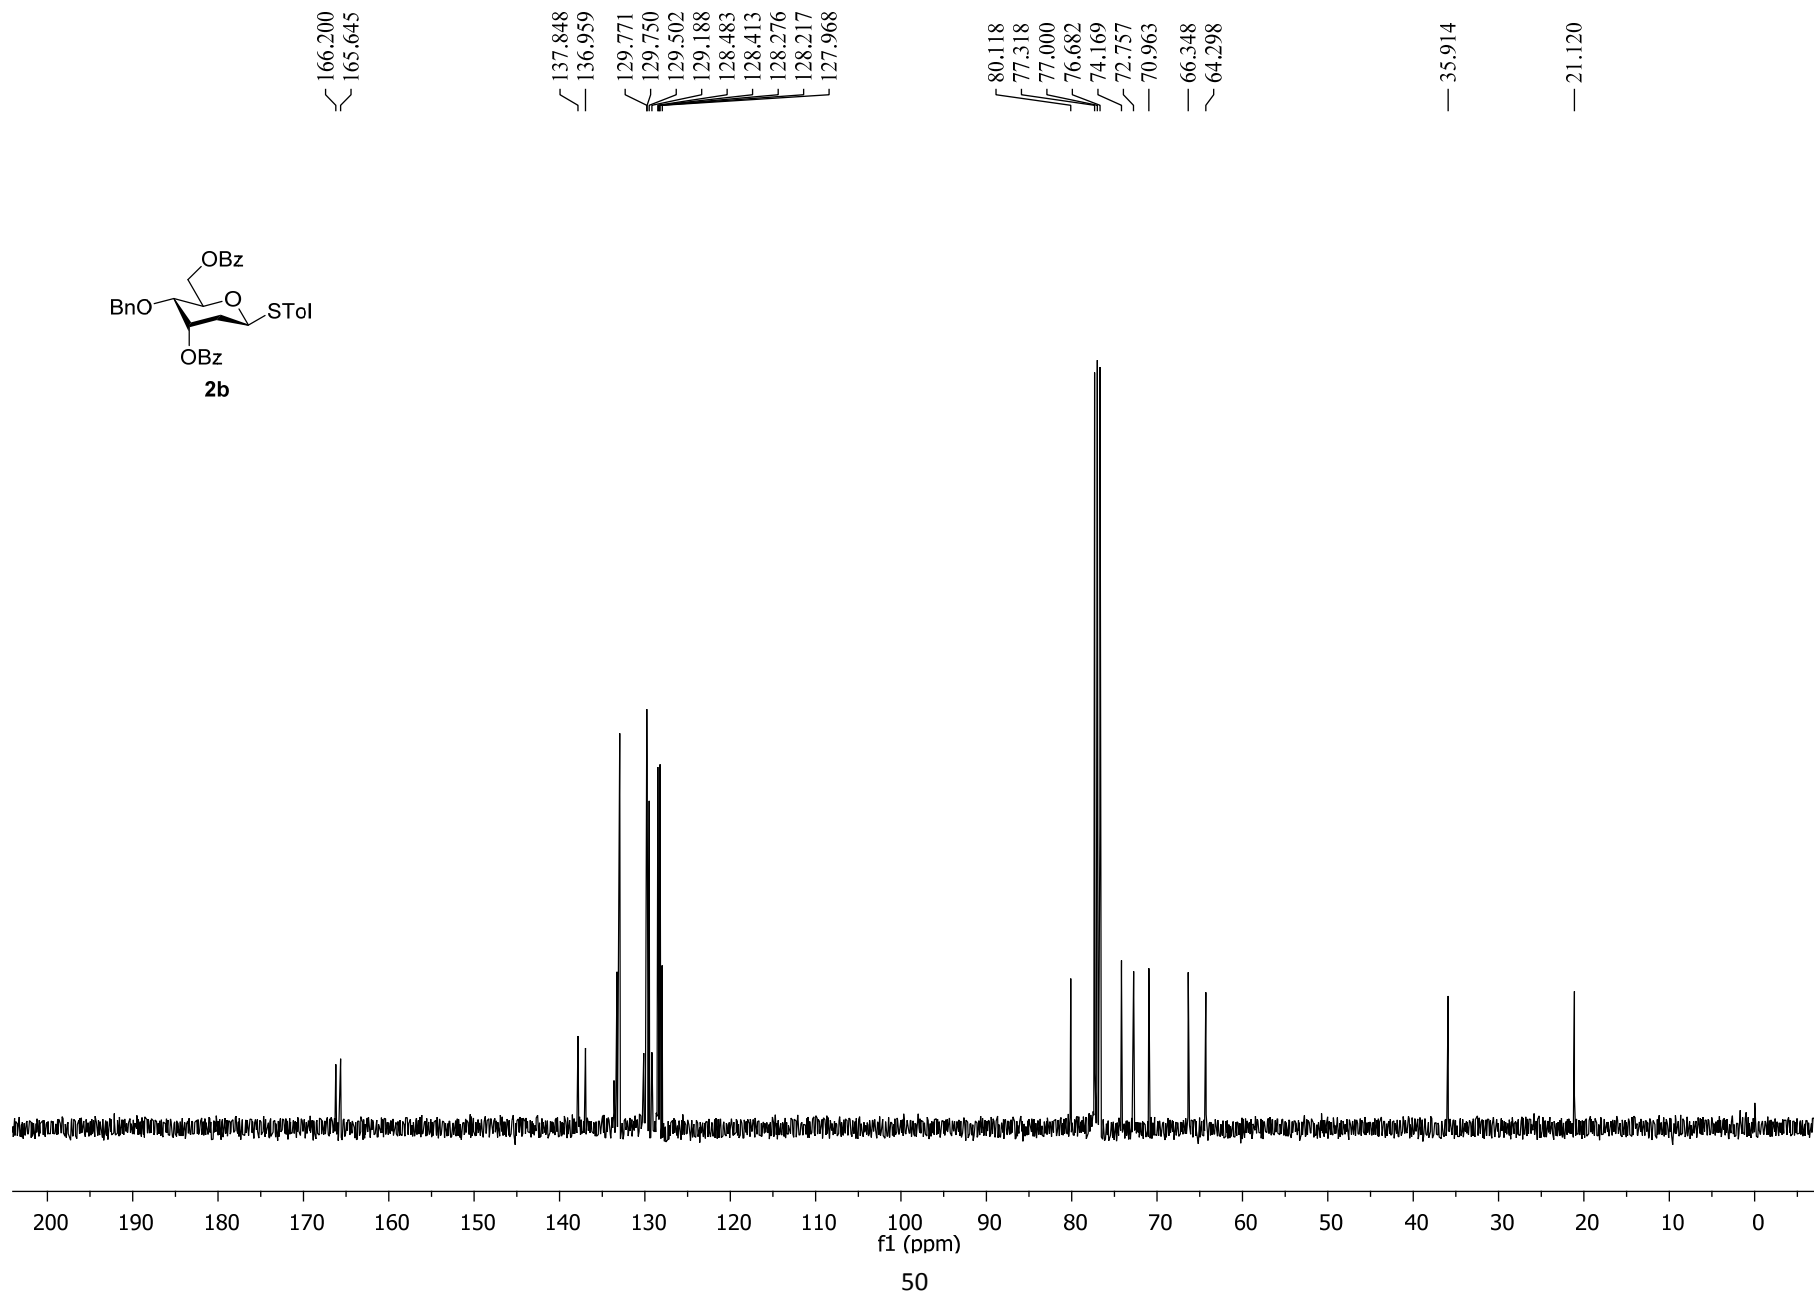

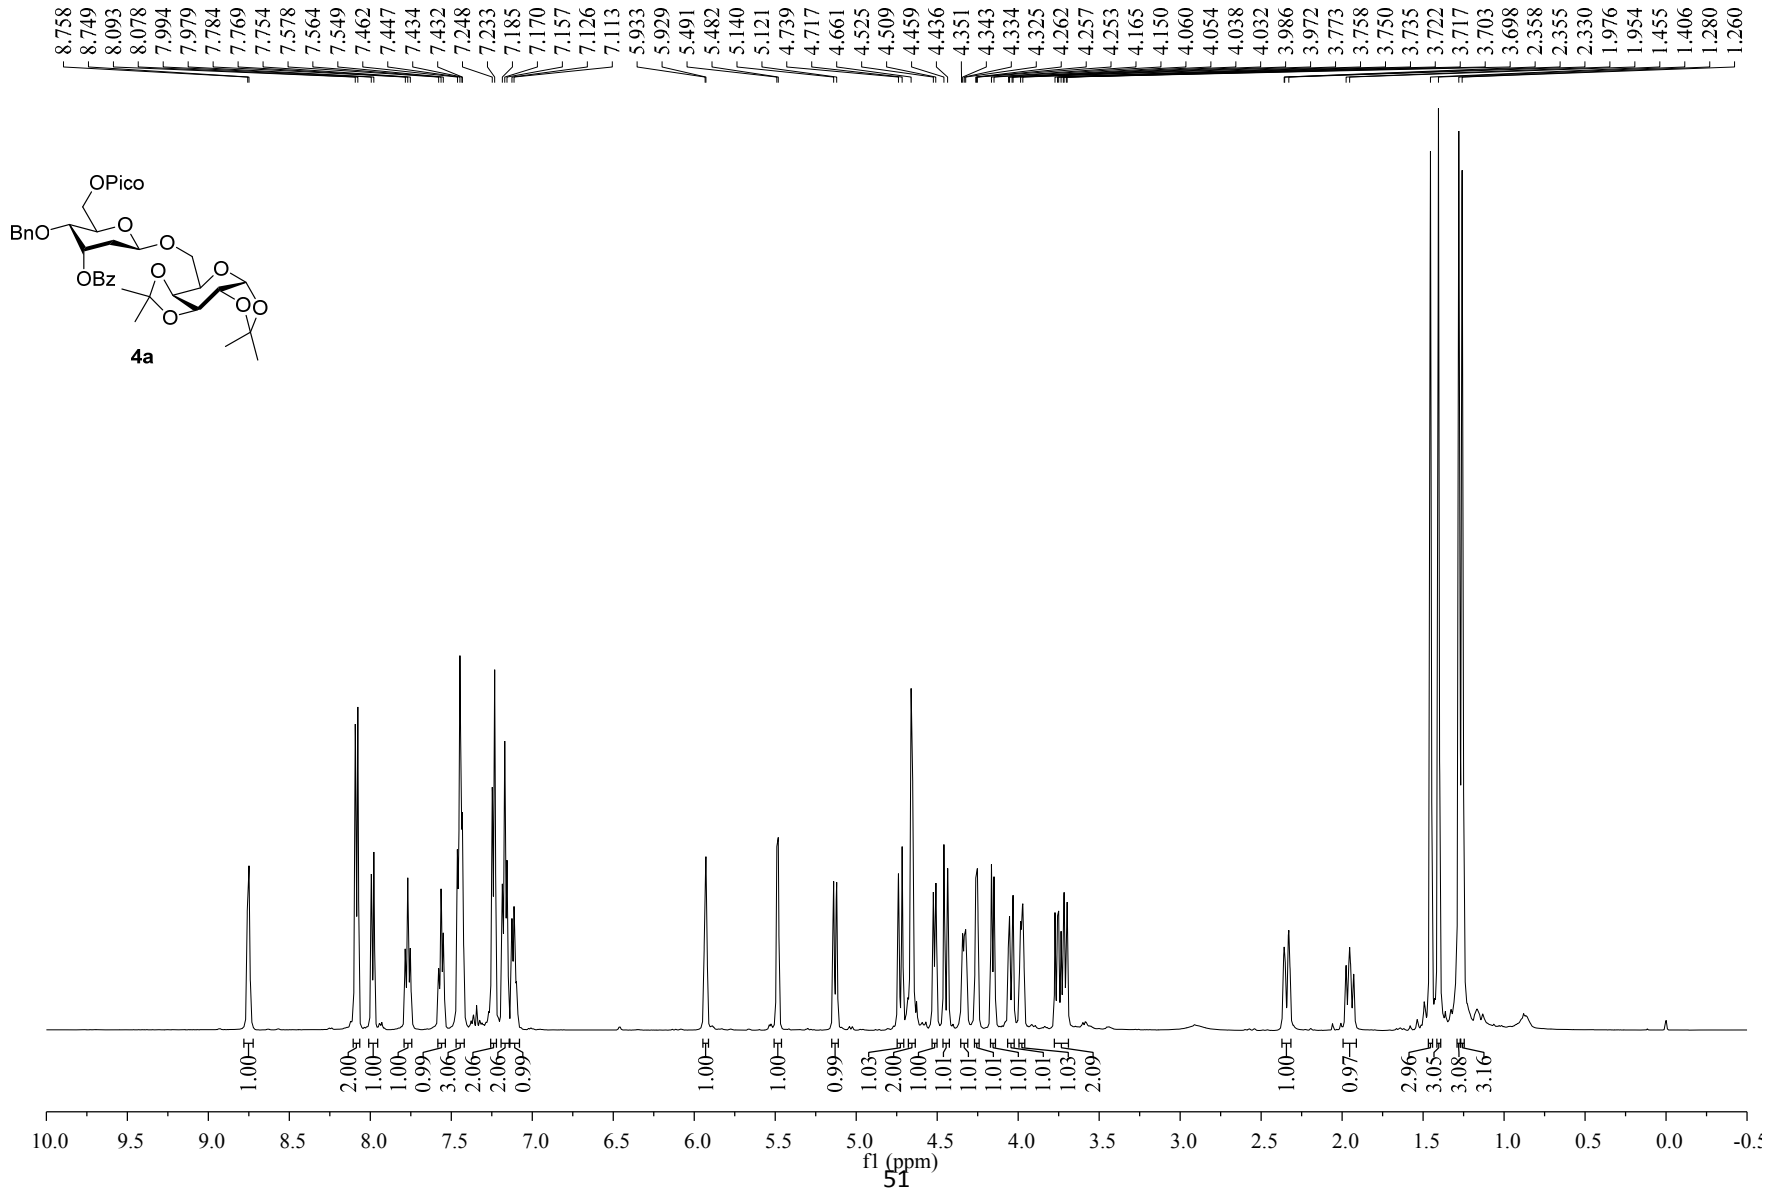

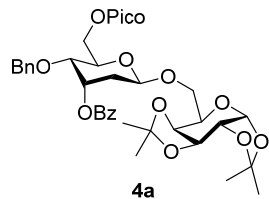

165.346  
164.580

149.712  
147.734  
137.028  
136.707  
133.023  
129.902  
129.585  
128.283  
128.176  
128.087  
127.657  
126.663  
125.075

109.040  
108.335

98.761  
96.114

73.022  
71.403  
71.222  
70.939  
70.486  
70.164  
68.701  
67.638  
66.232  
65.014

35.348

25.832  
24.764  
24.235

<sup>13</sup>C-nondecoupling:  
 $J_{CH'} = 160 \text{ Hz}$   
 $J_{CH} = 178.4 \text{ Hz}$

99.158  
97.878  
96.585  
95.158

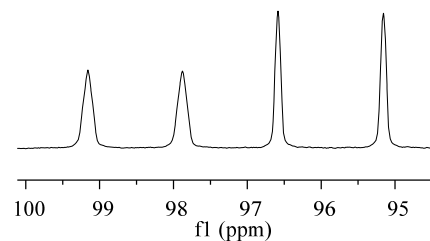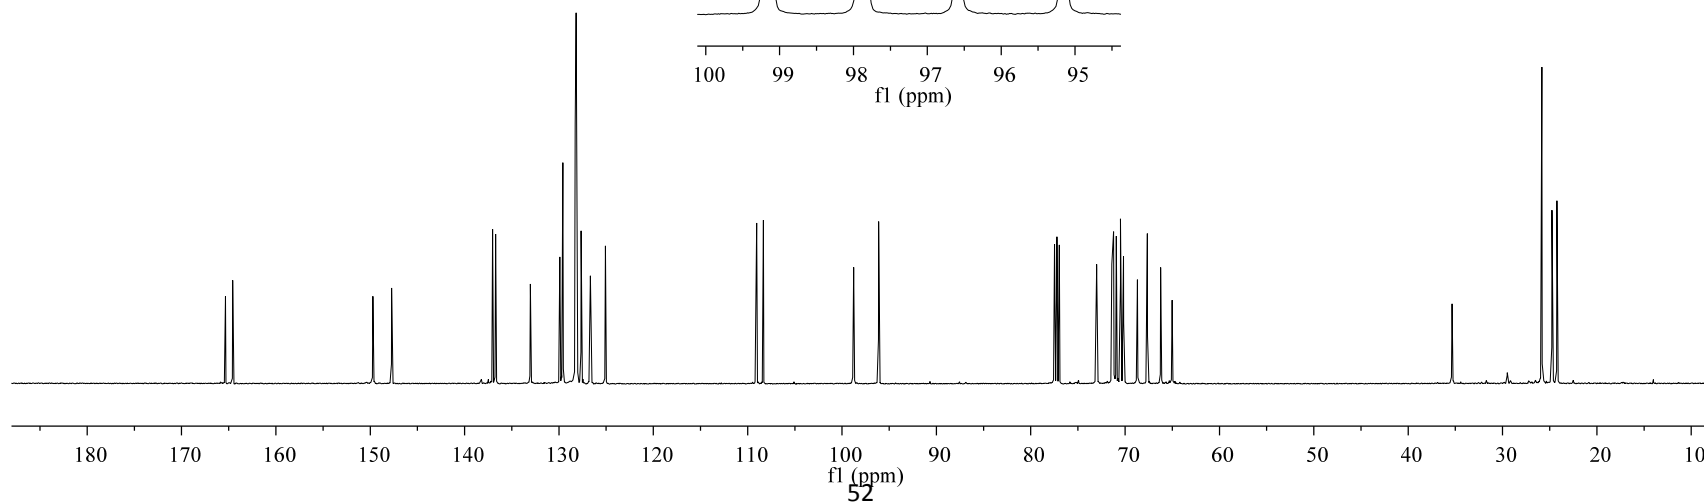

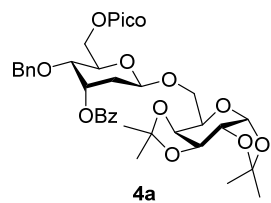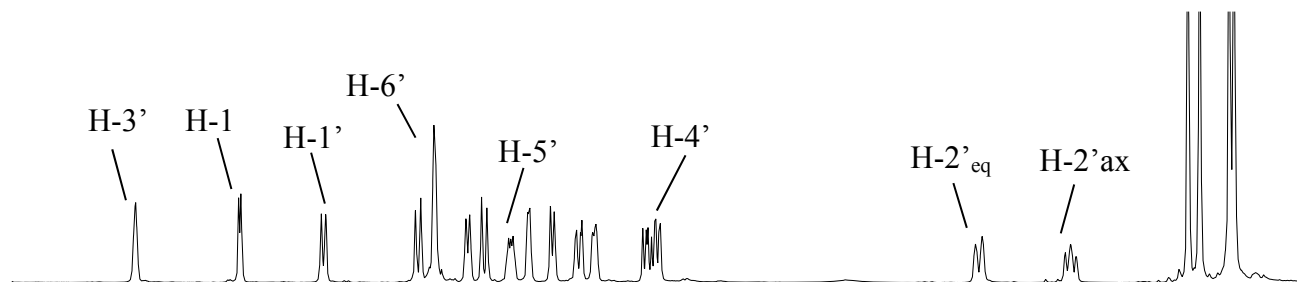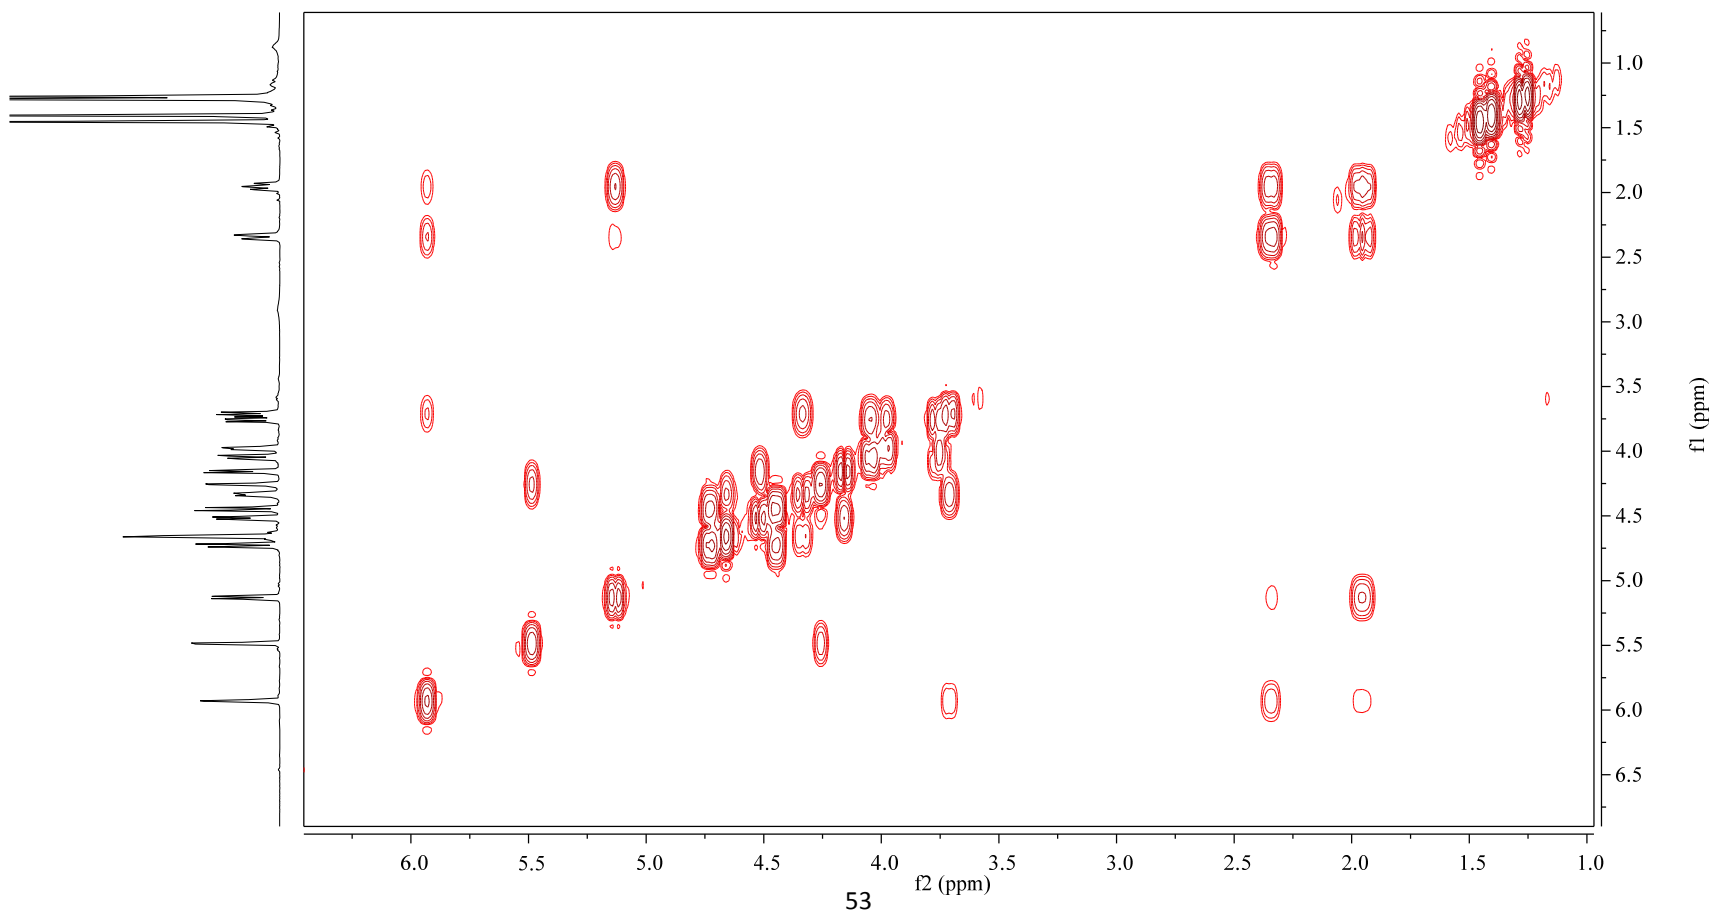

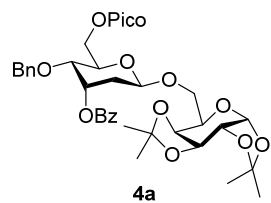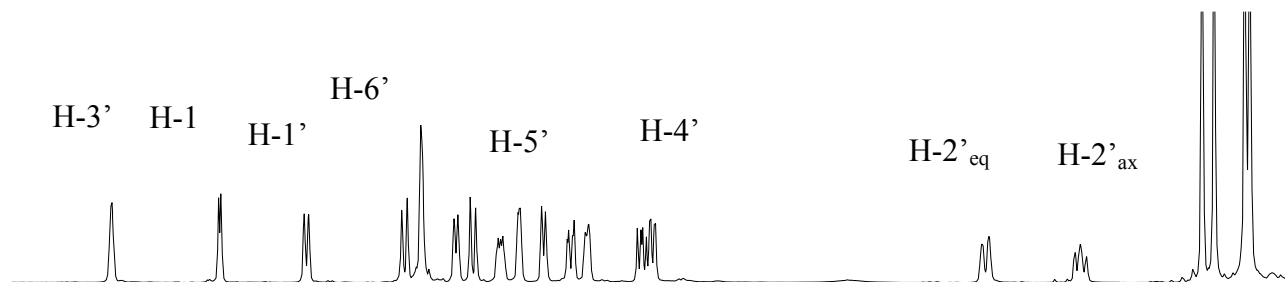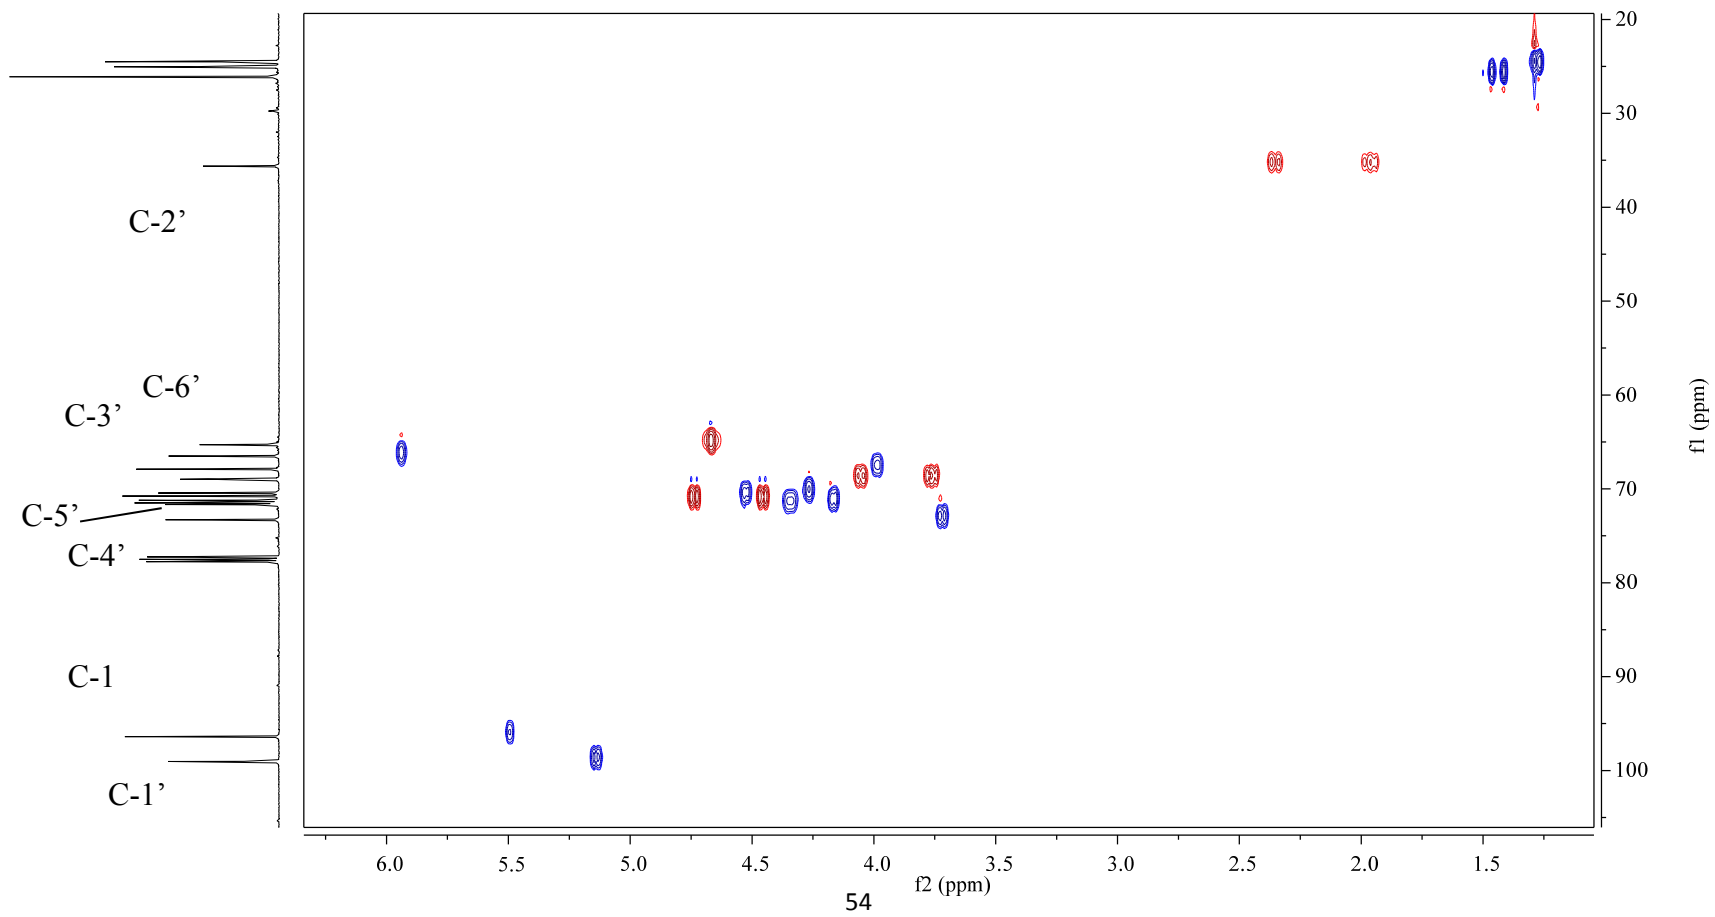

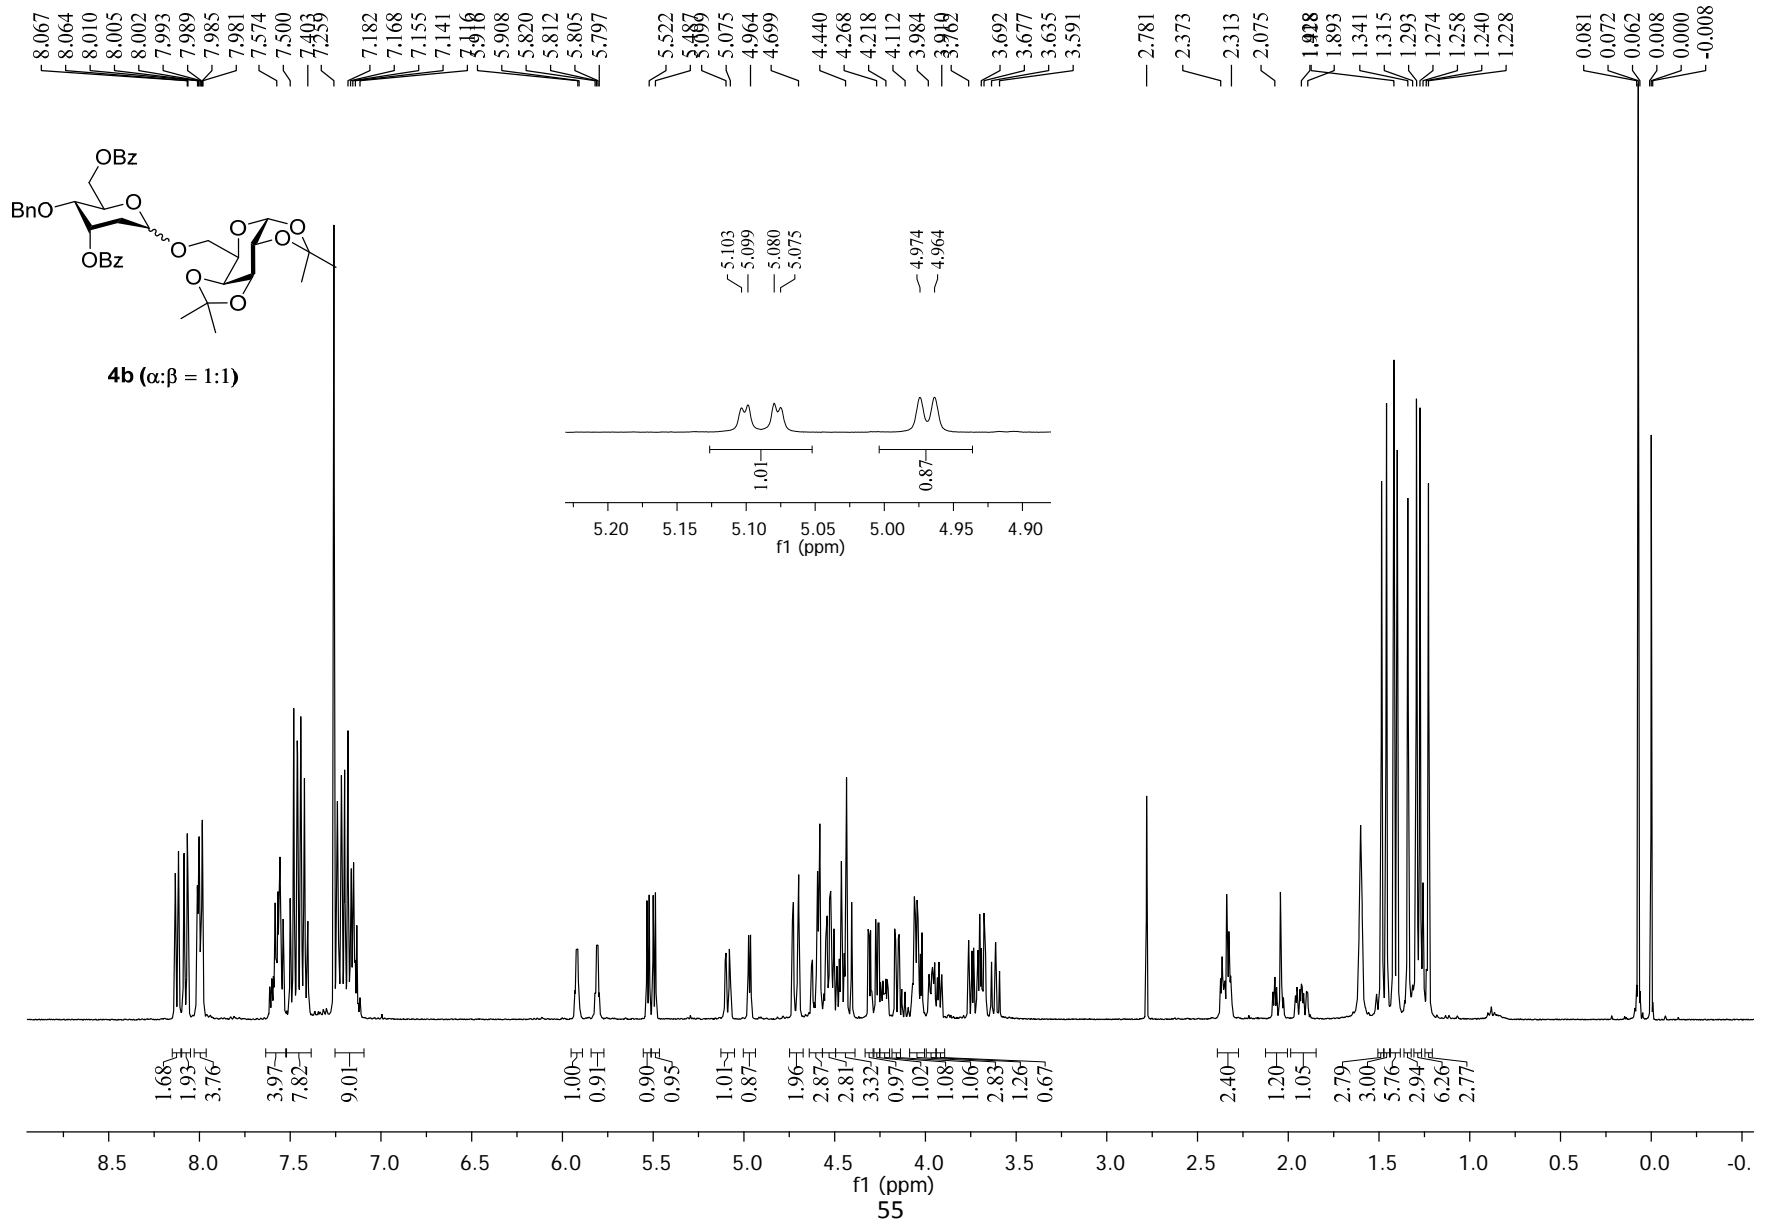

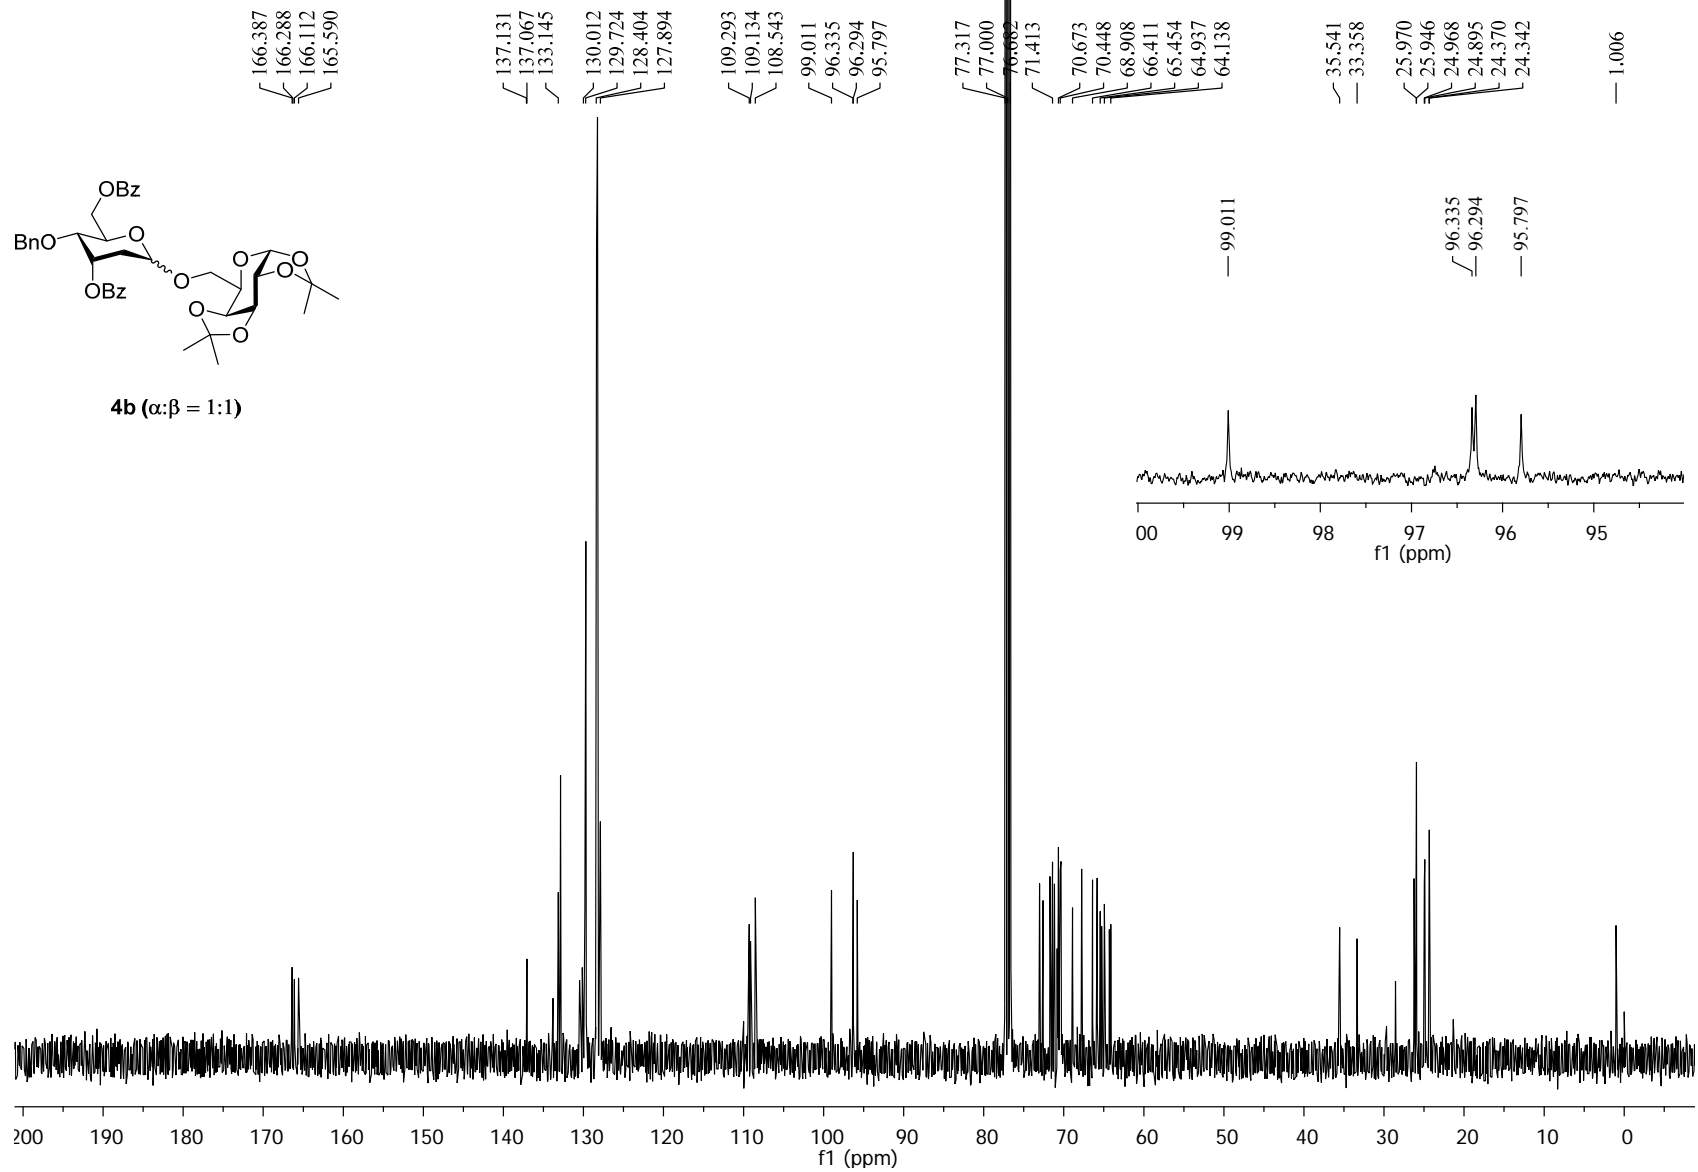



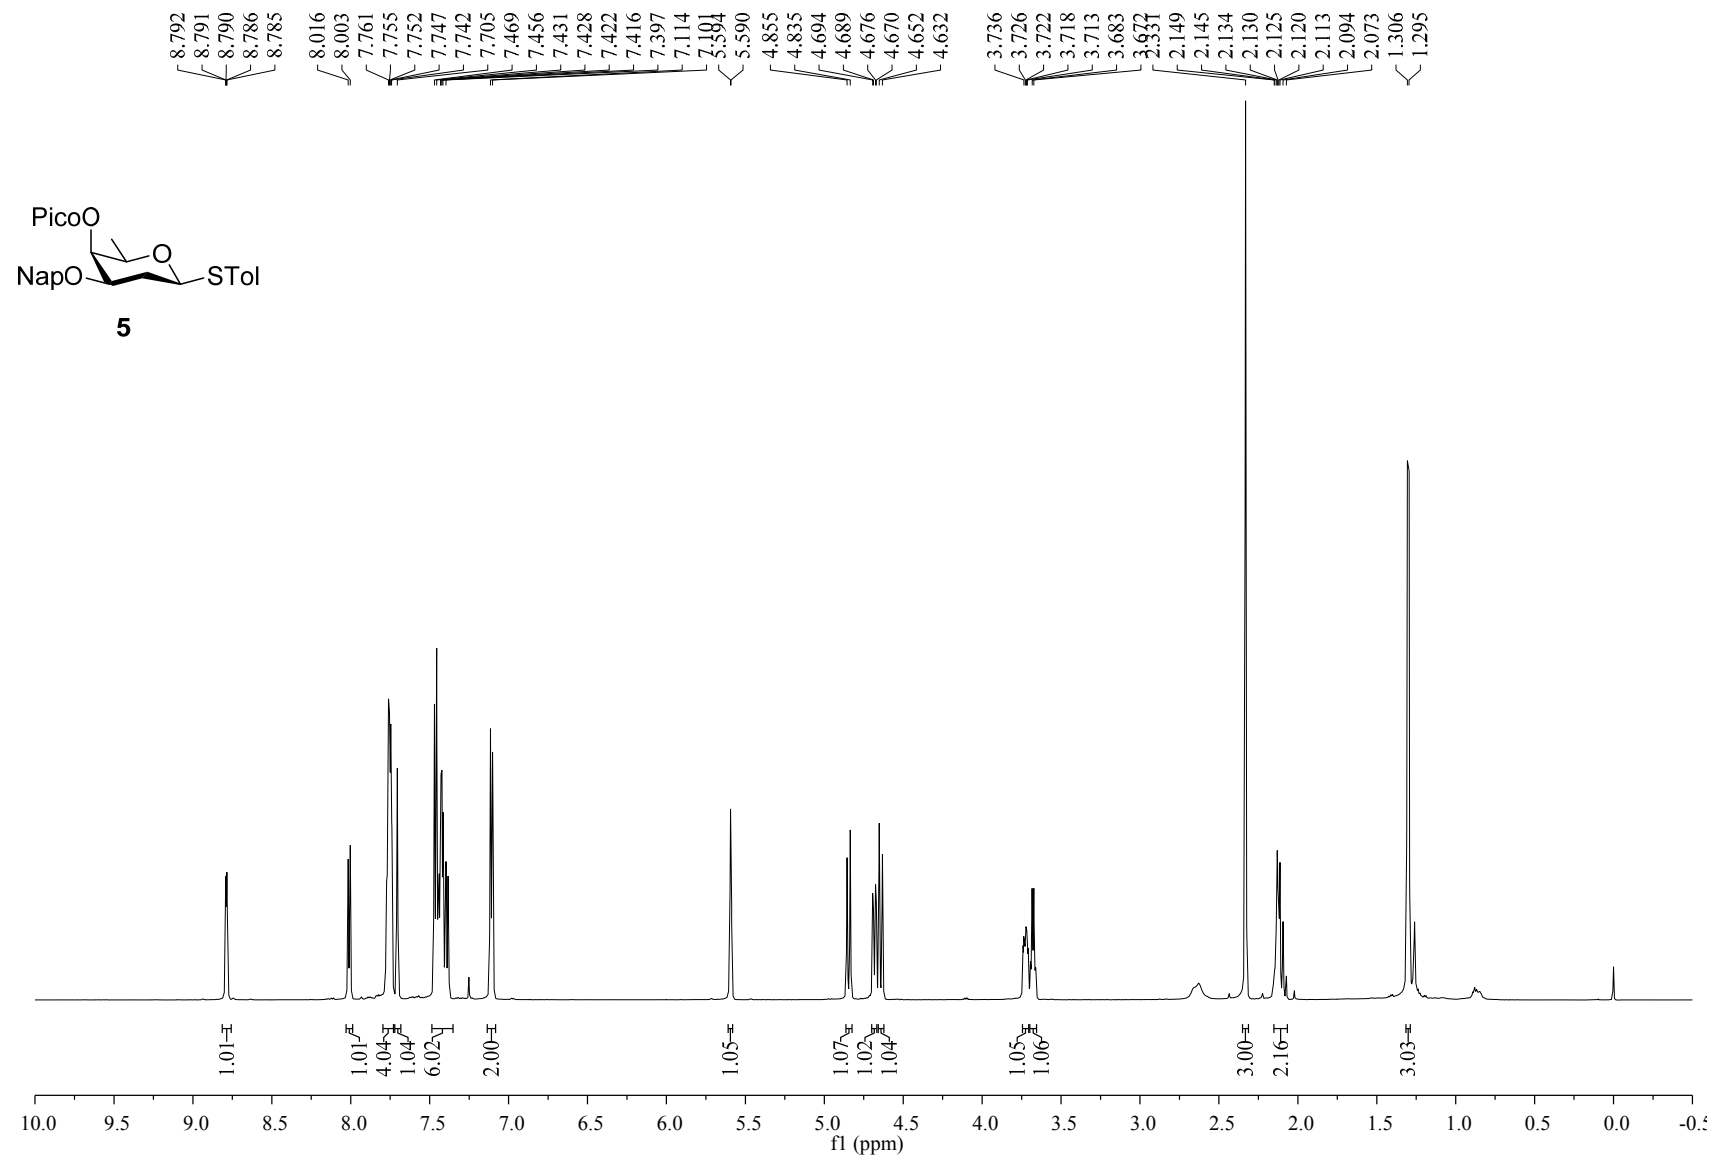

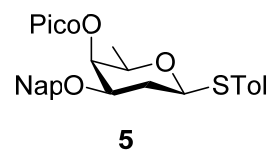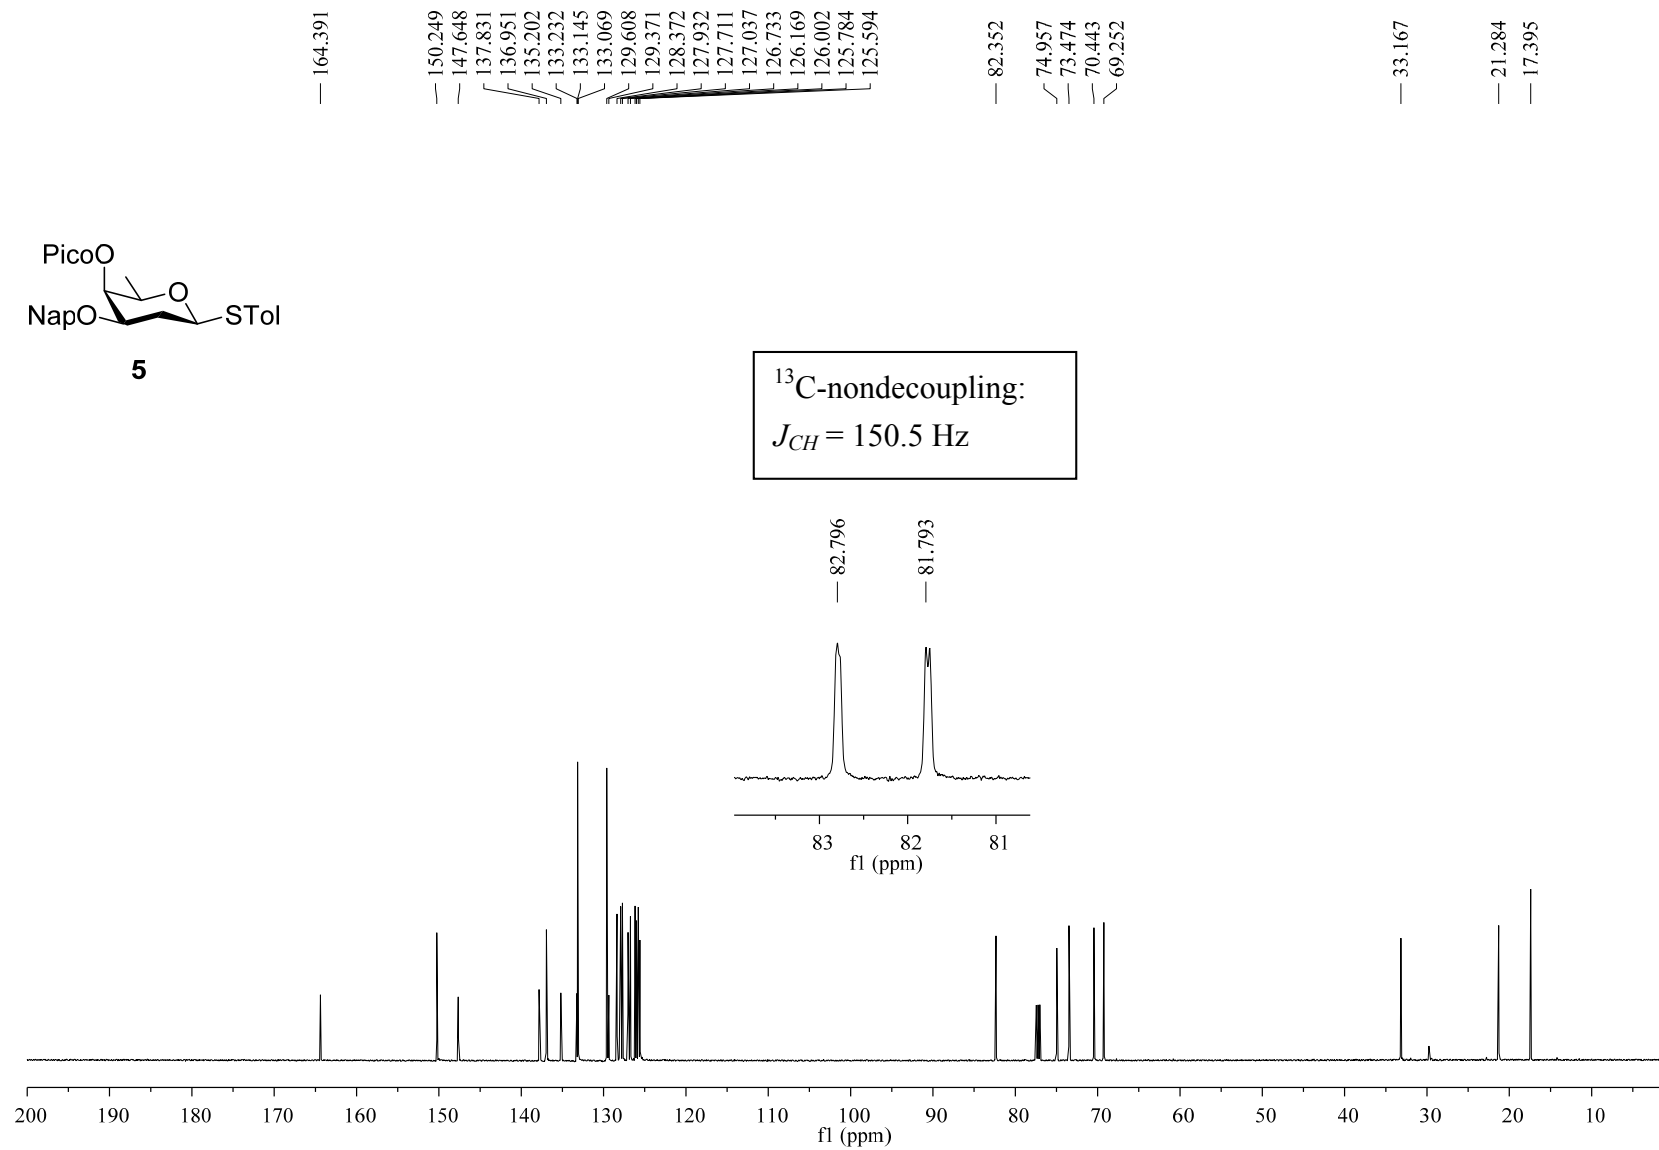

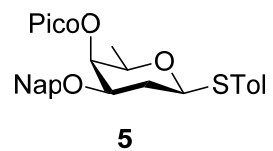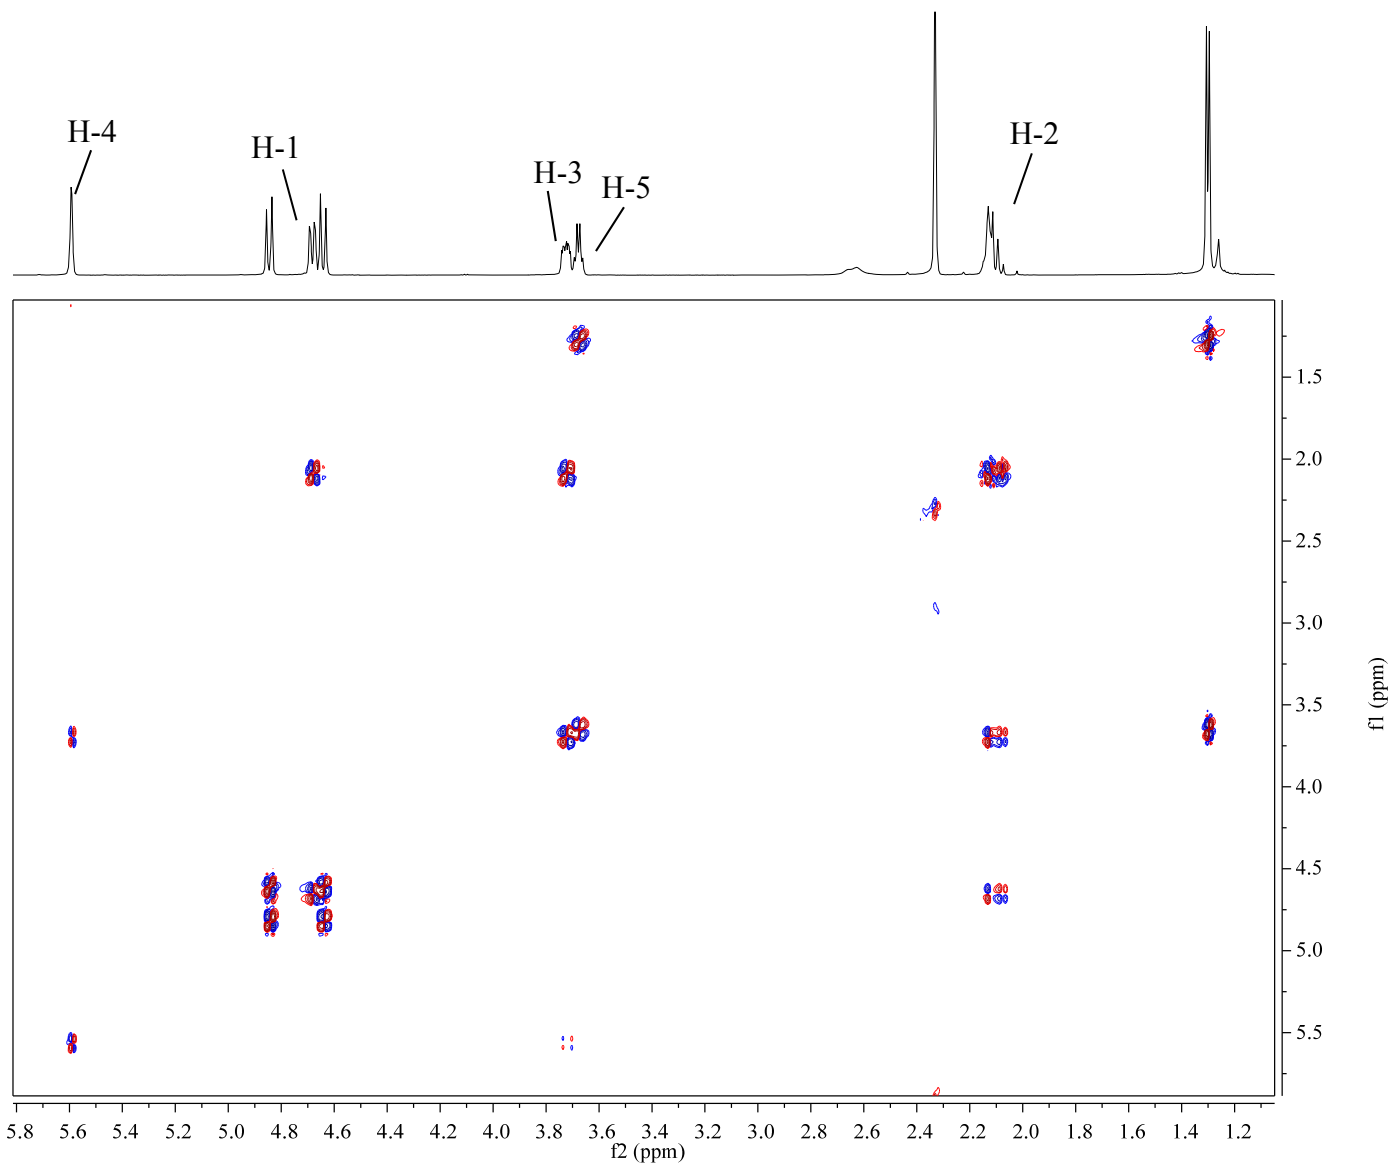

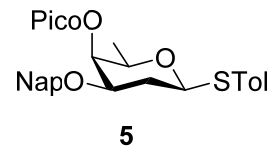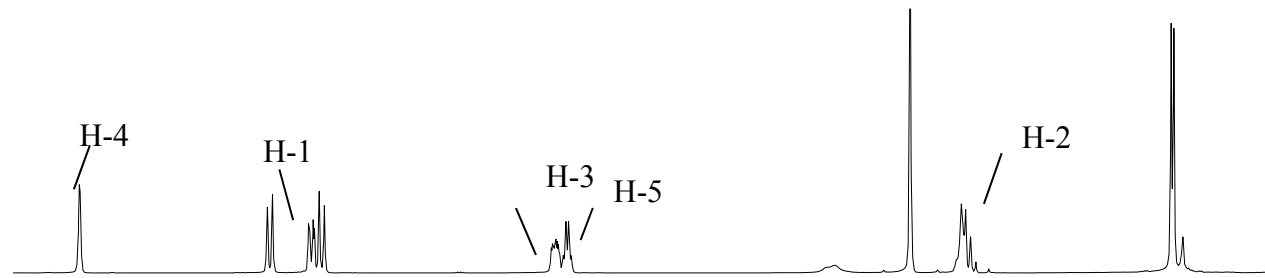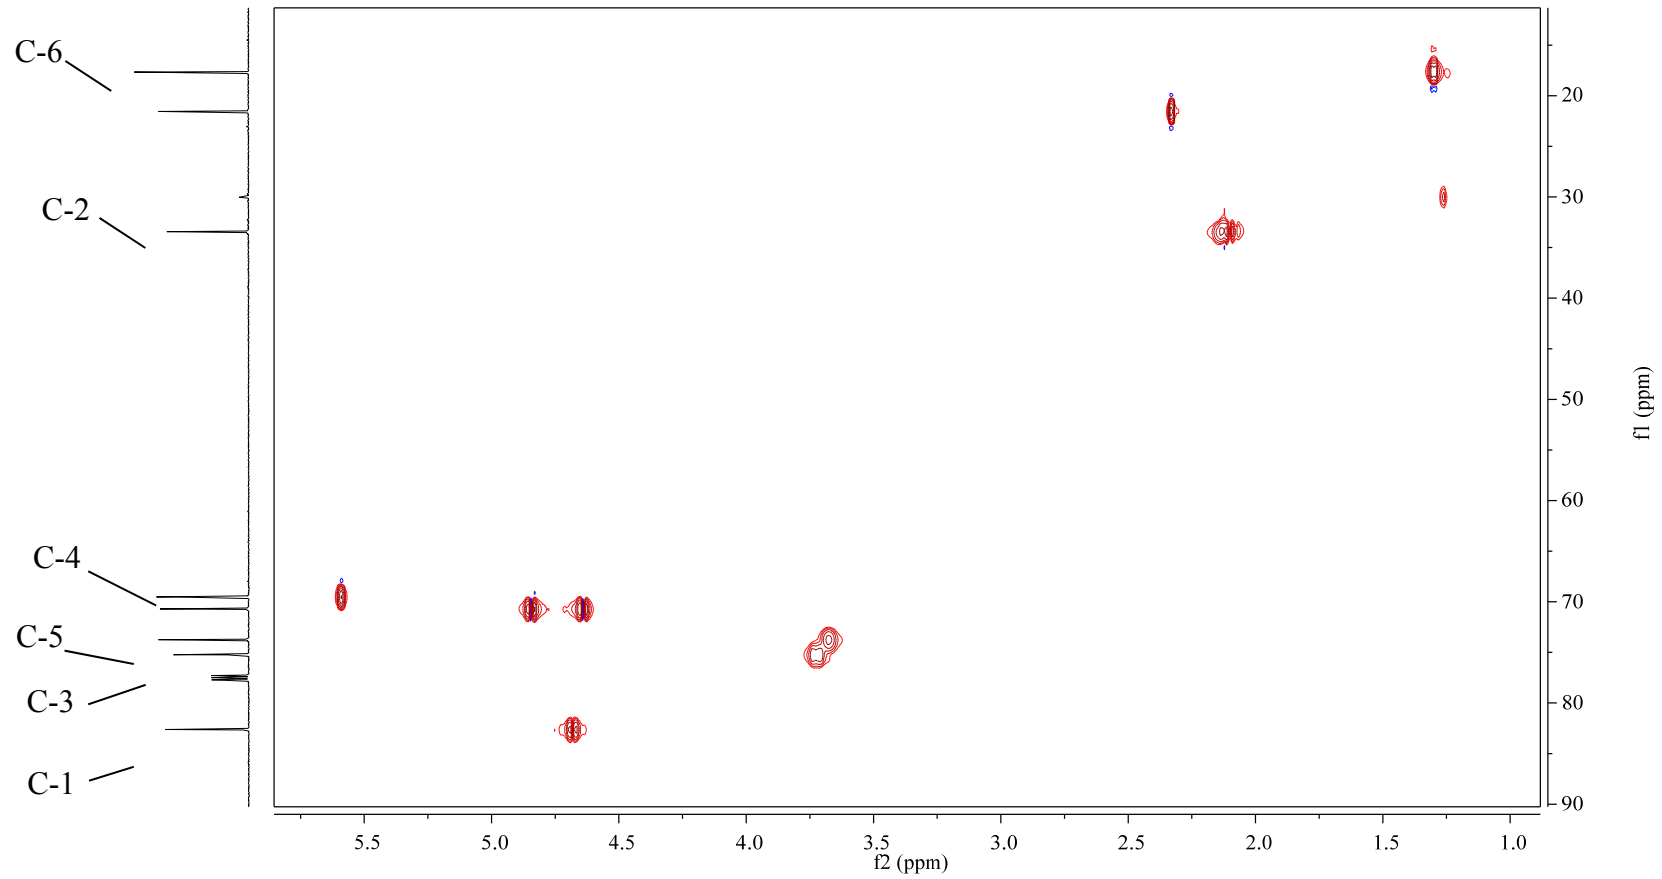

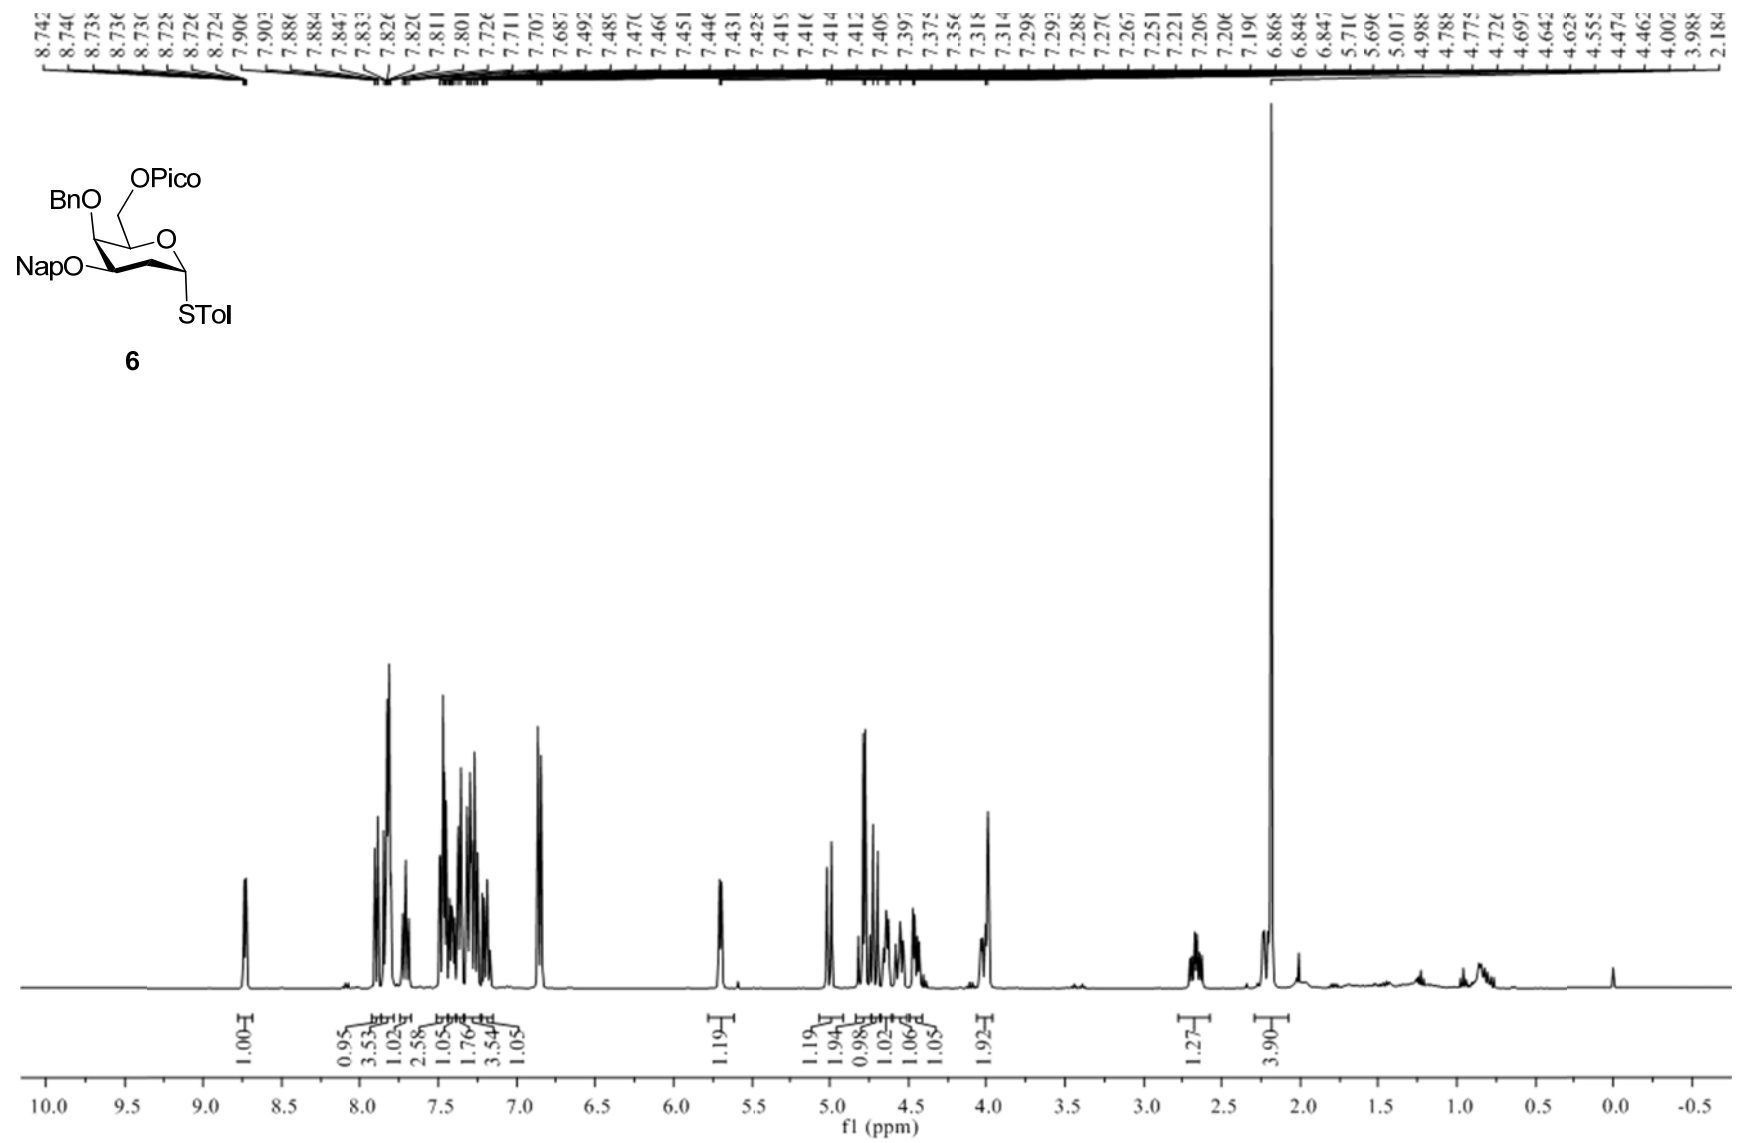

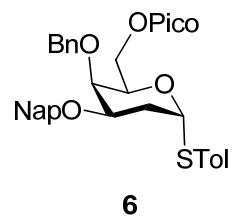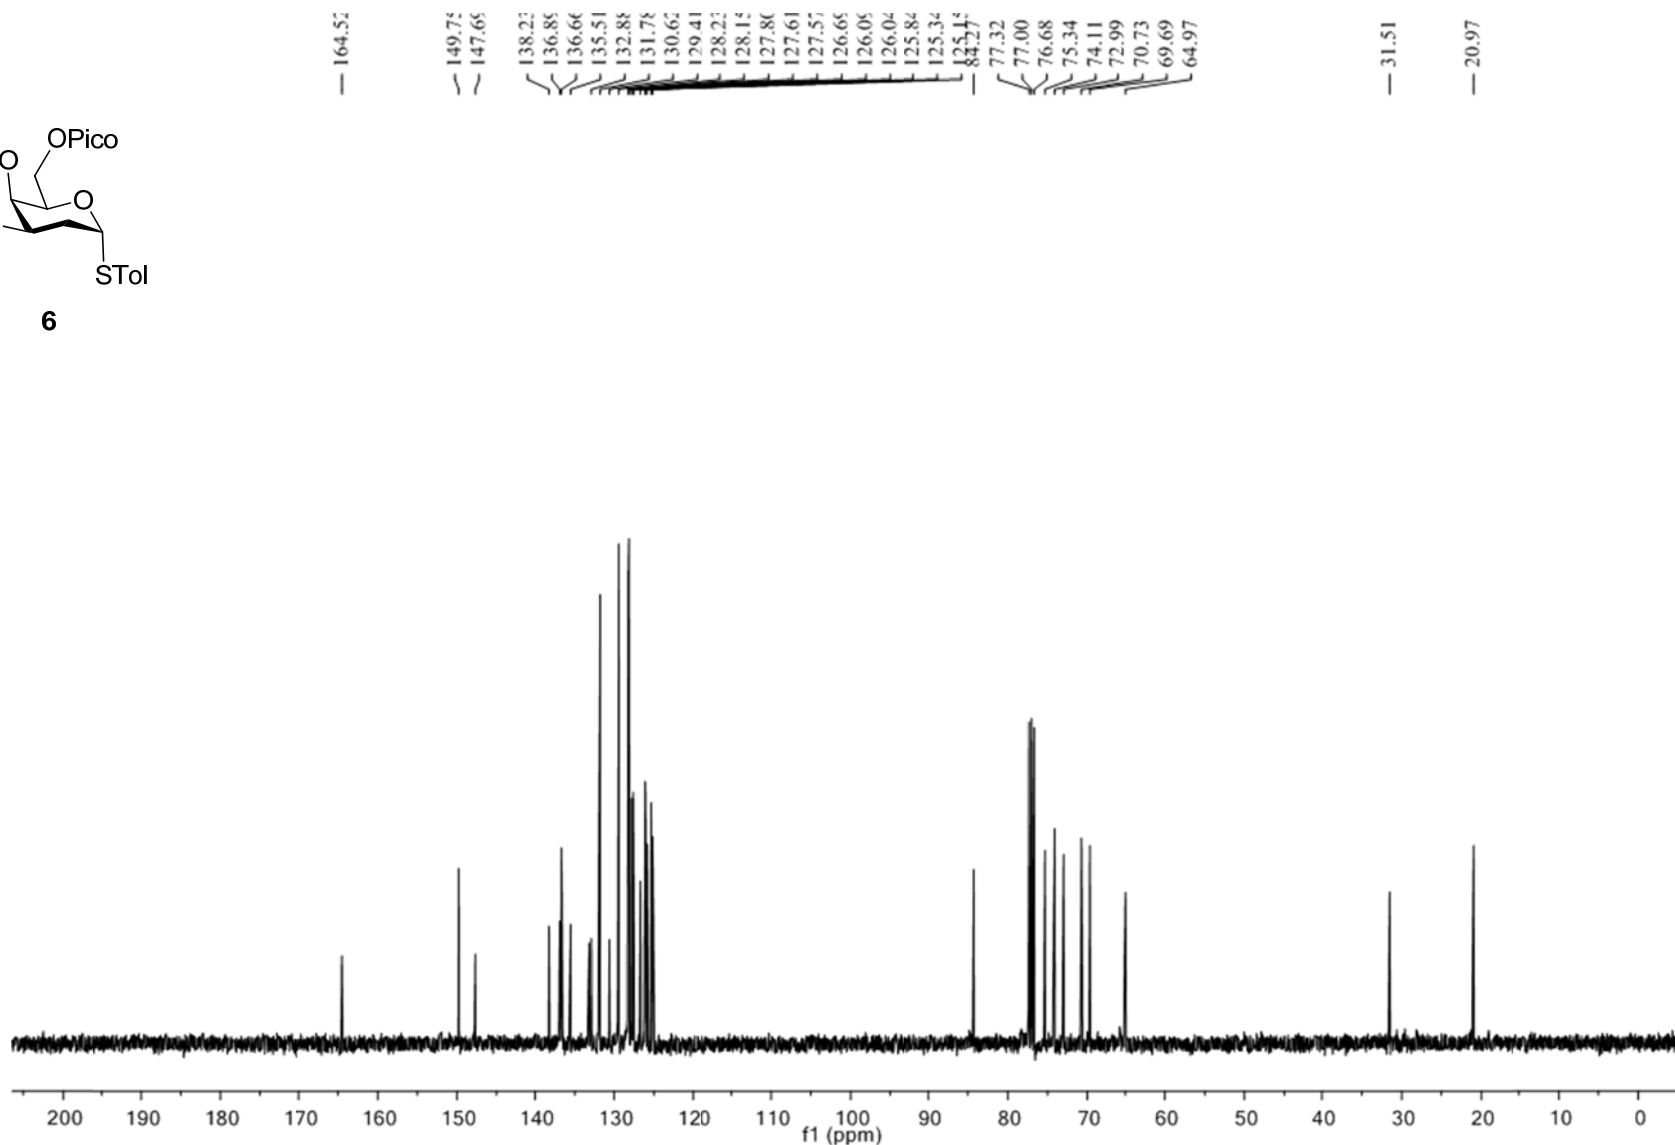

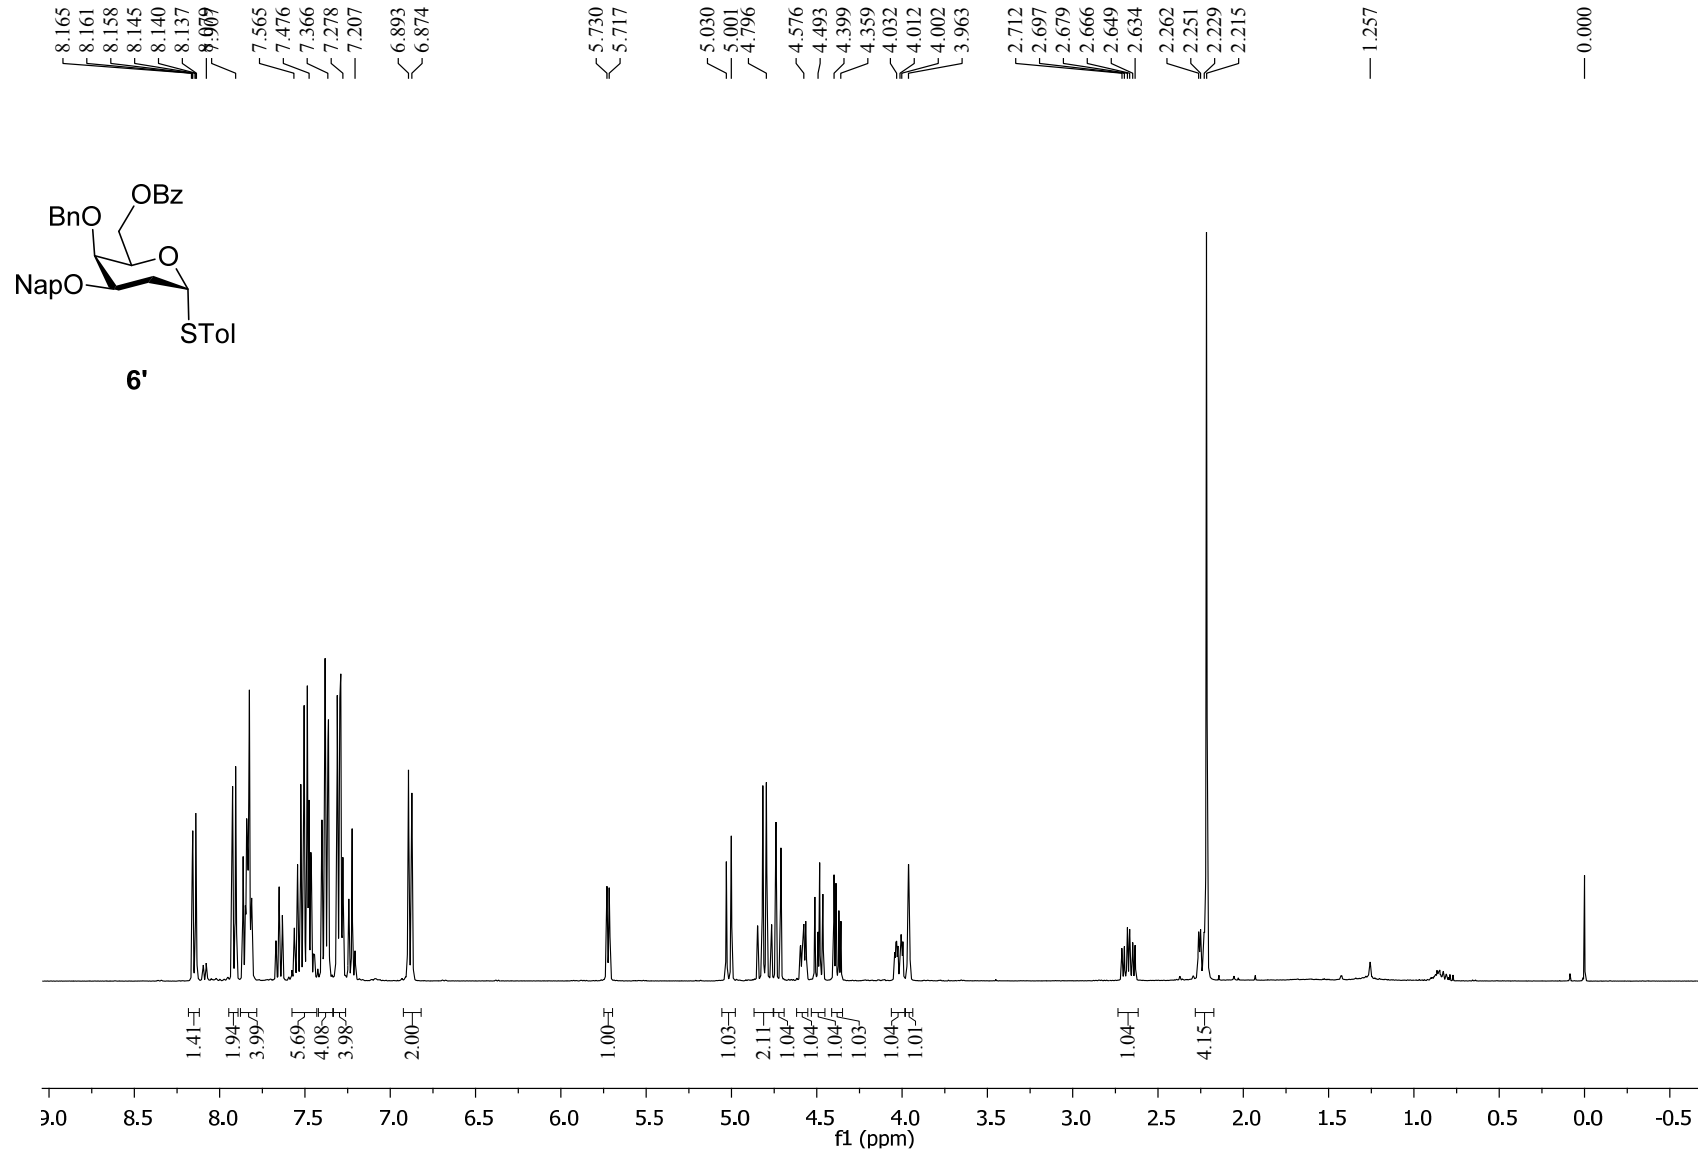

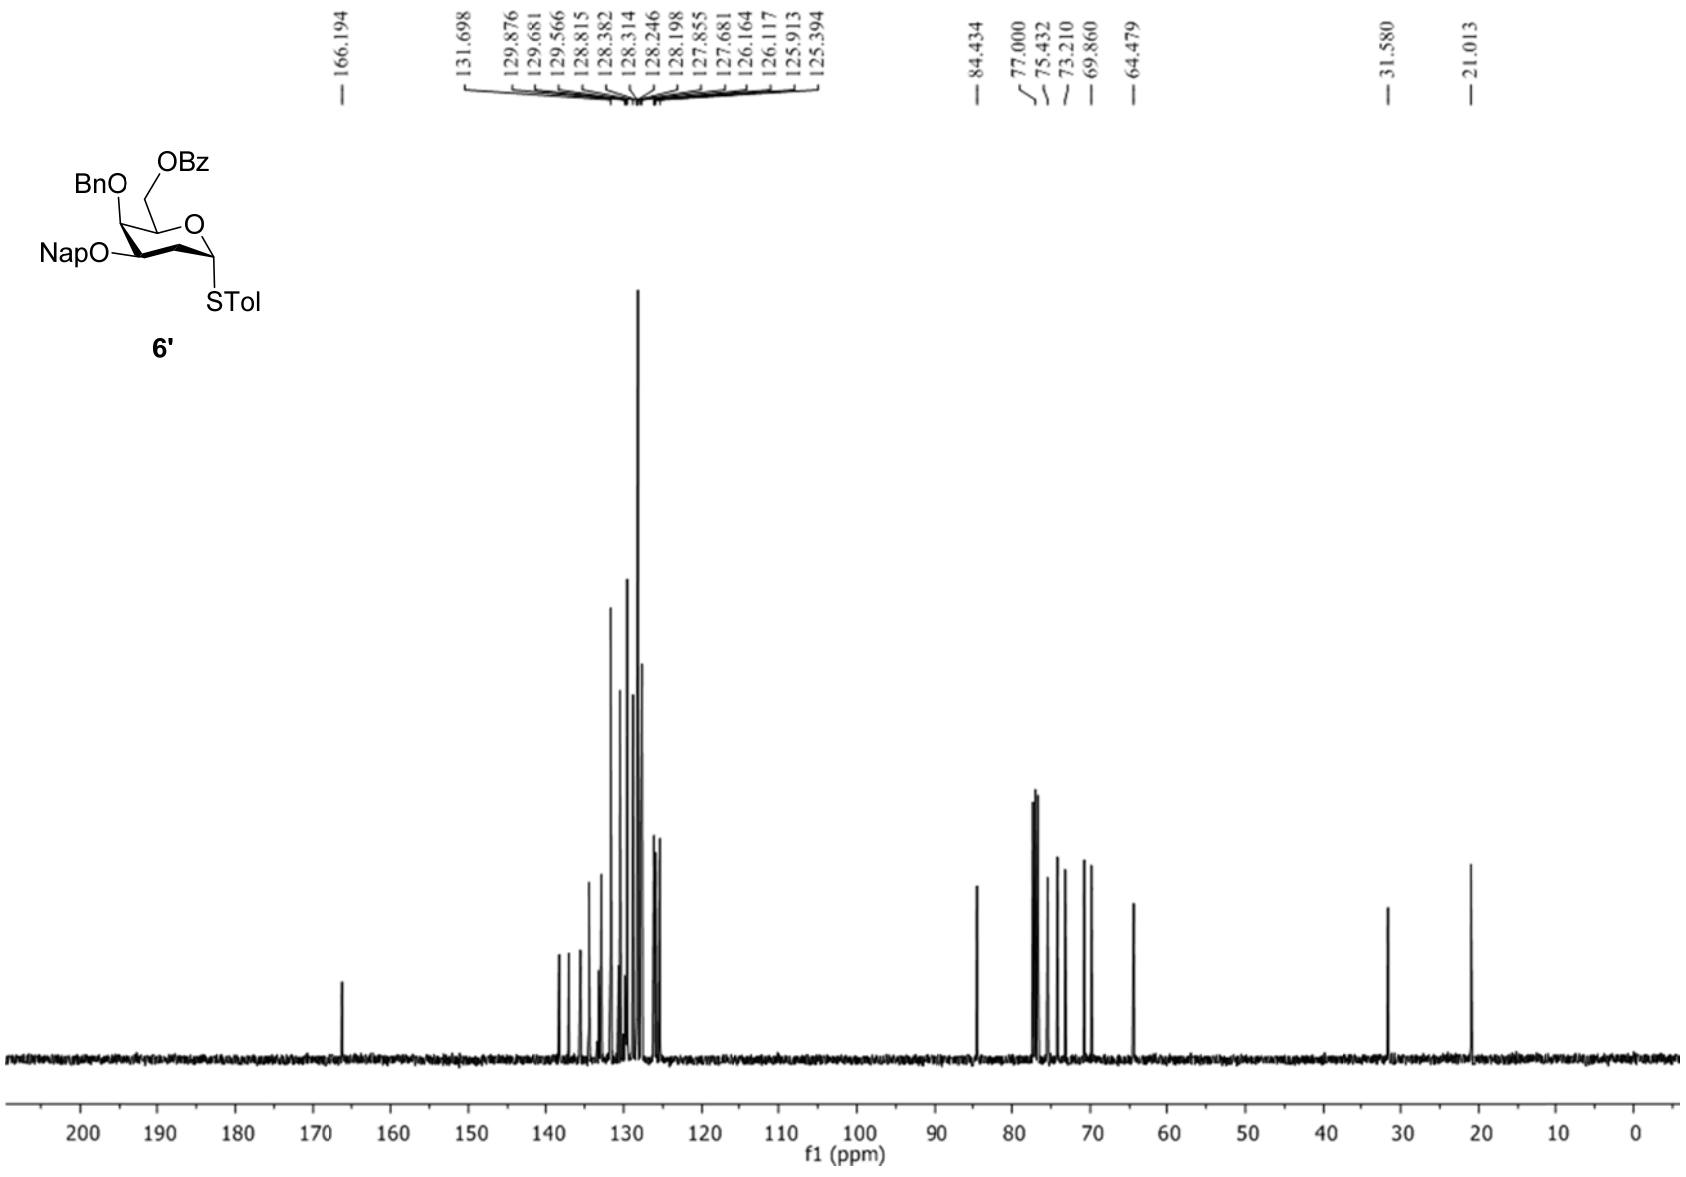



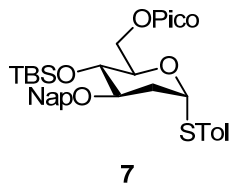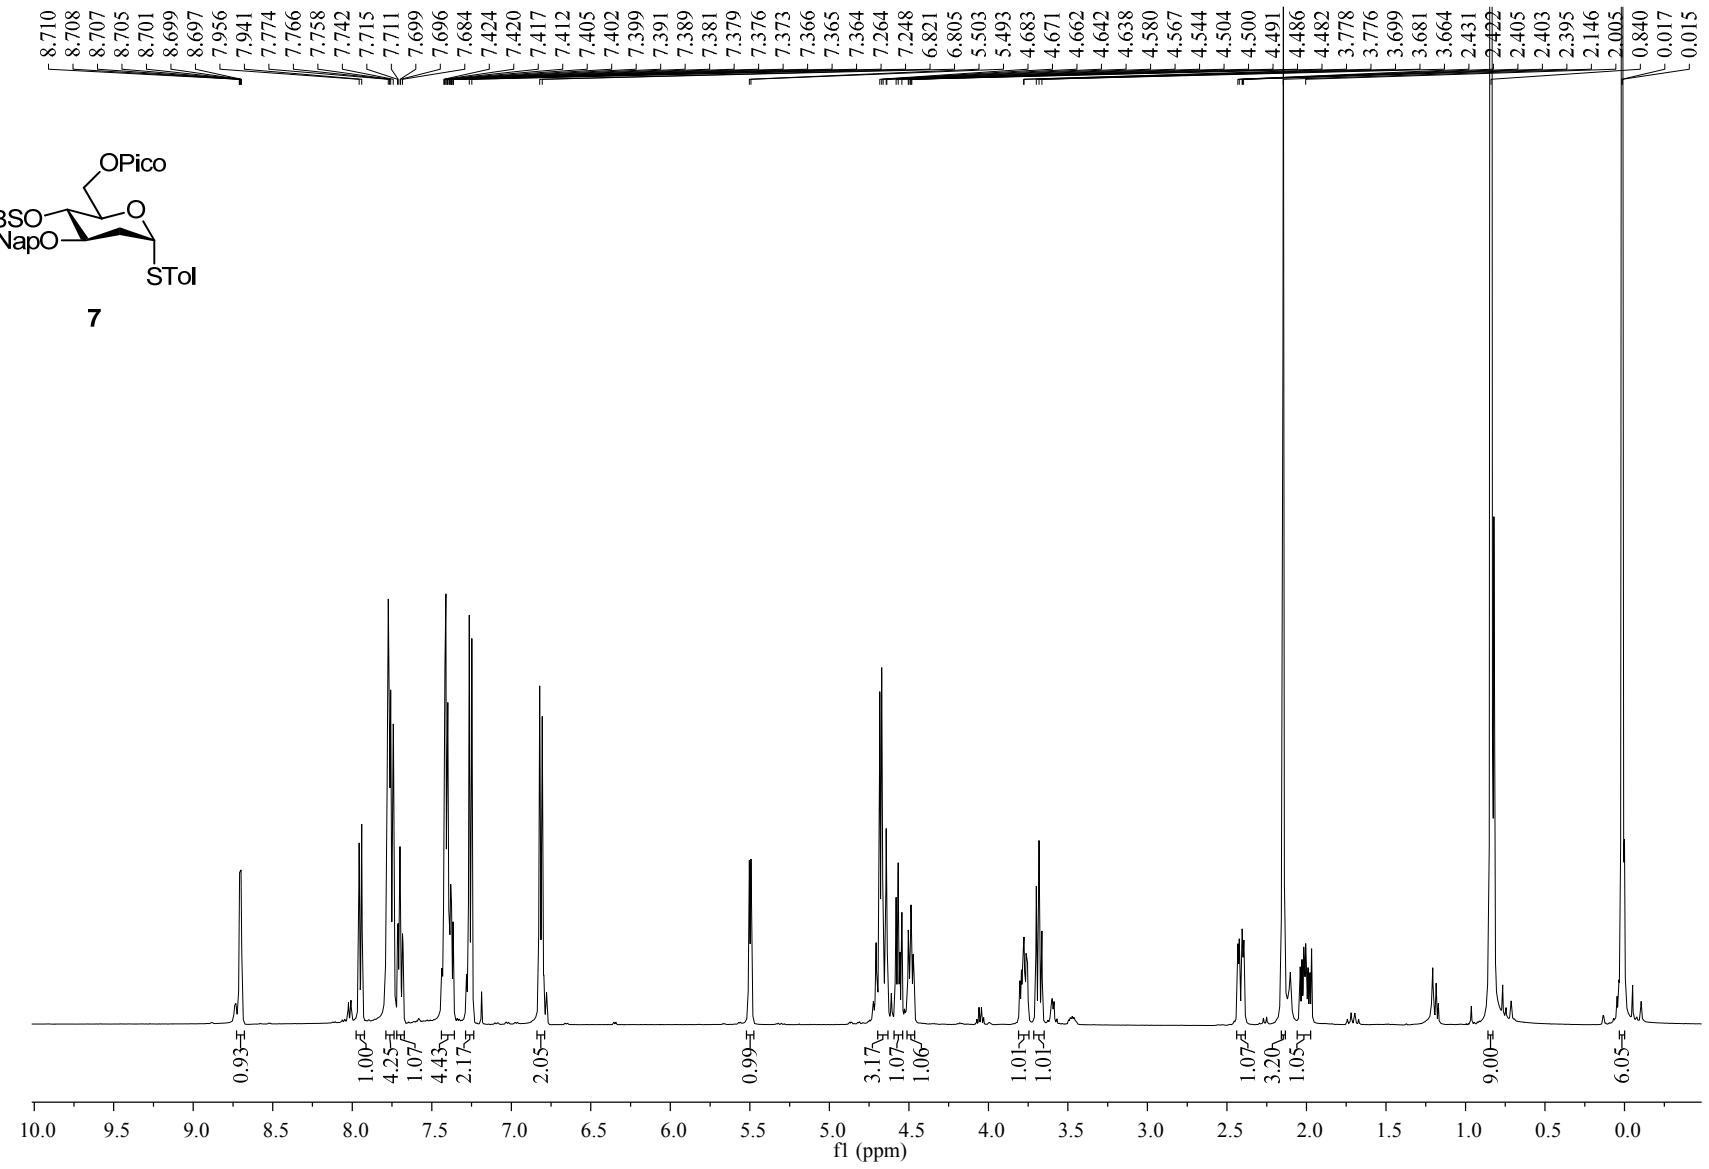

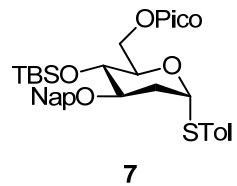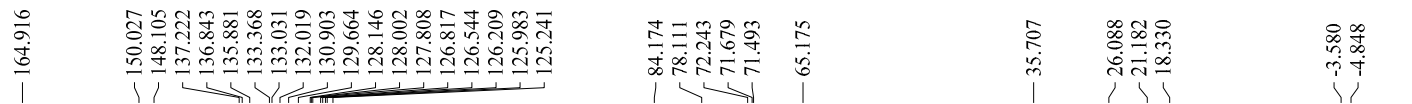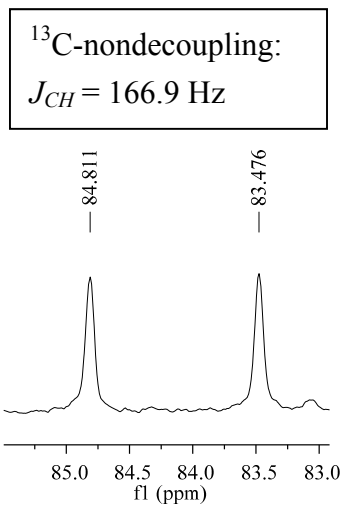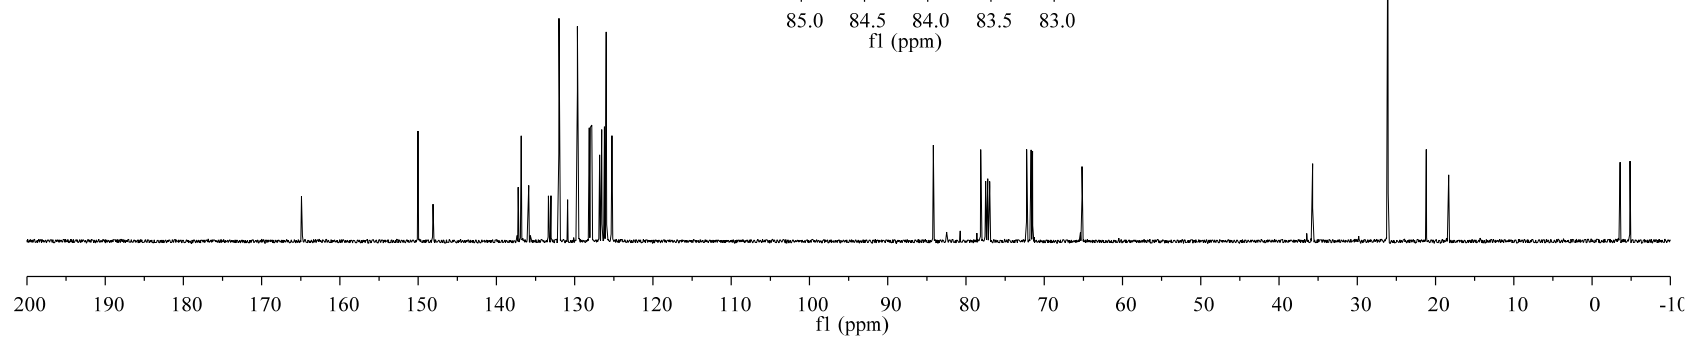

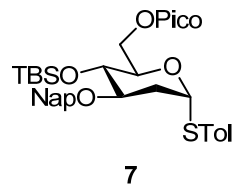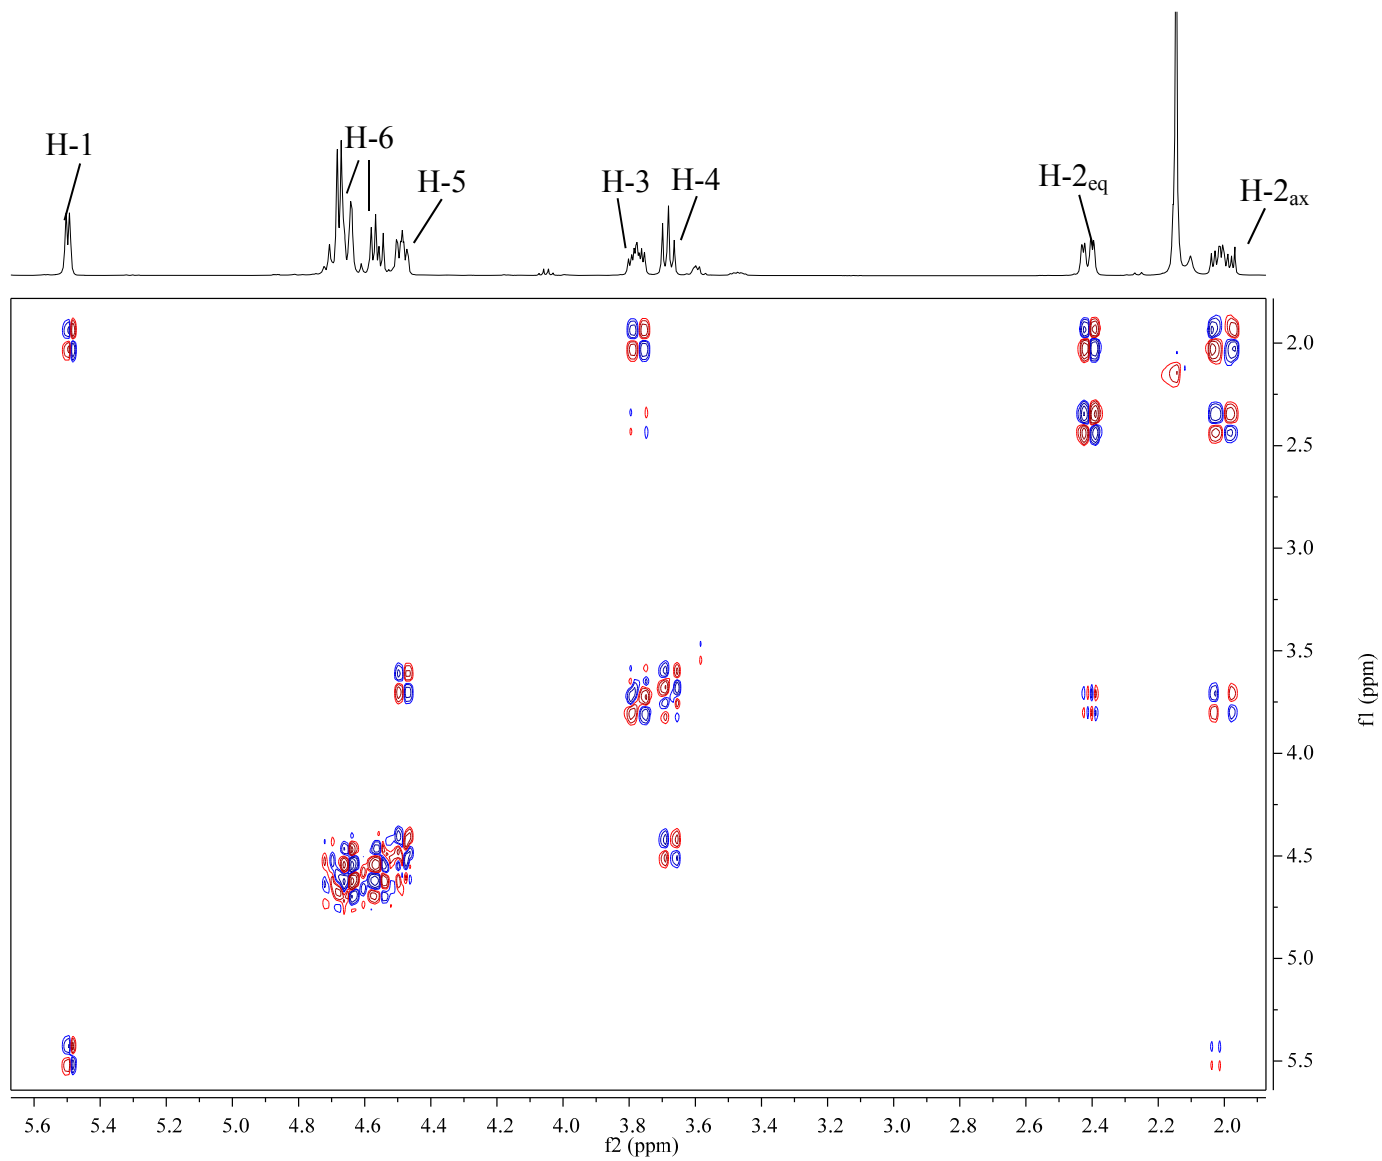

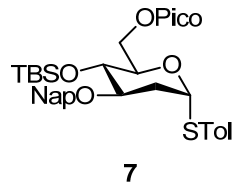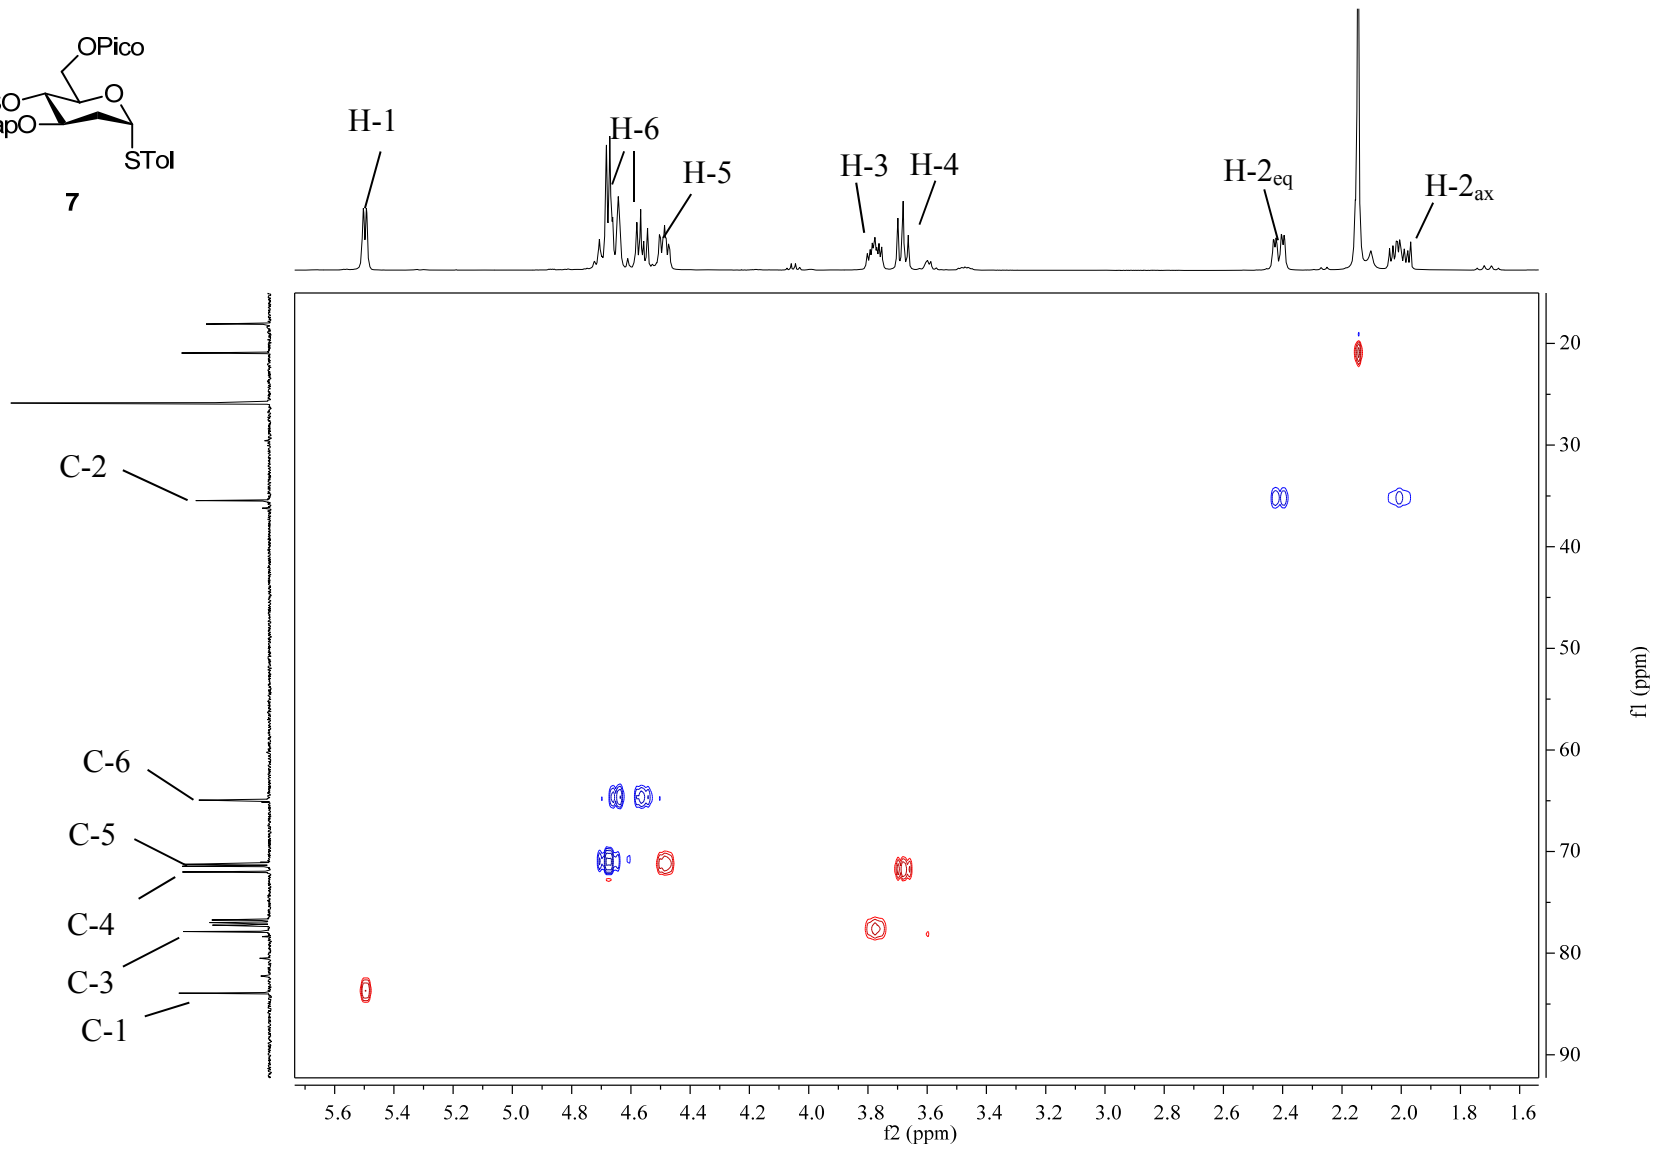

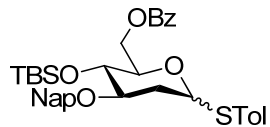

$7'$   $\alpha:\beta = 1:1$

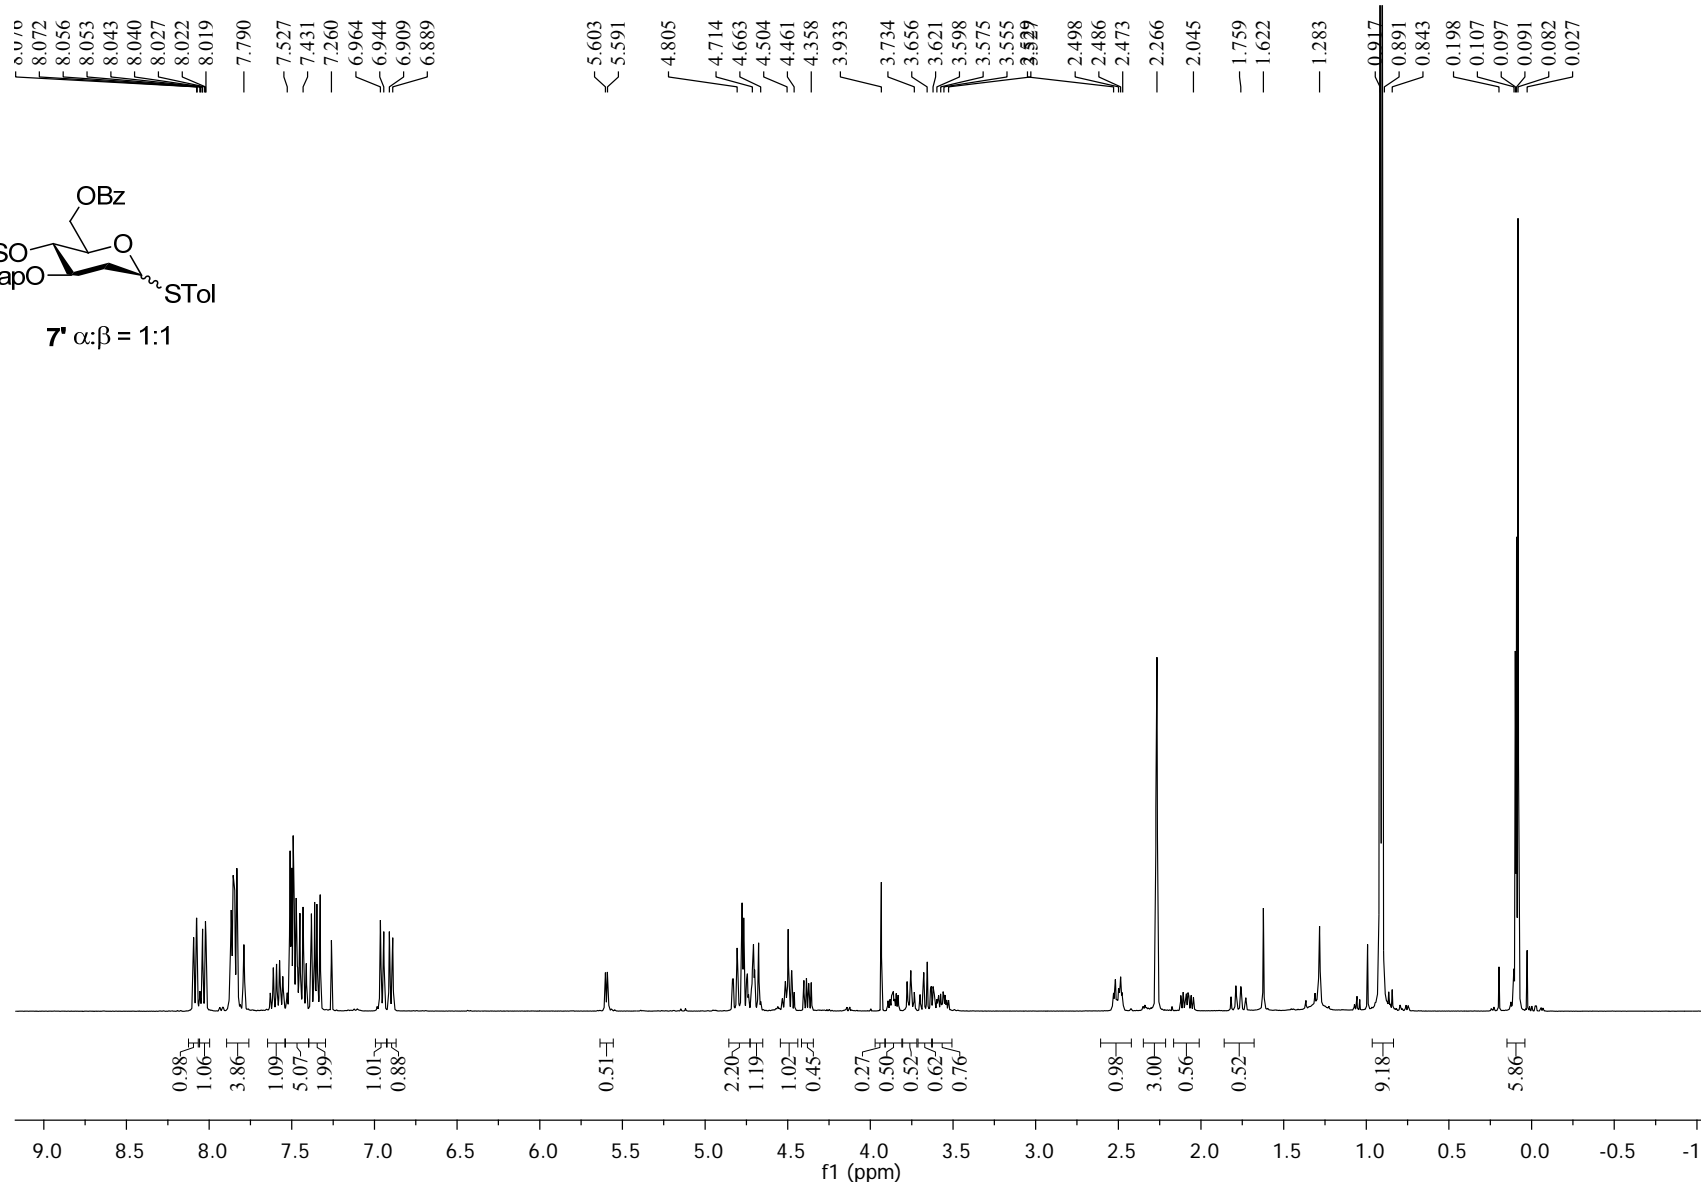

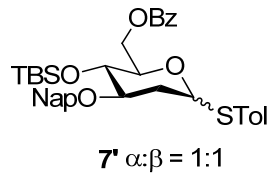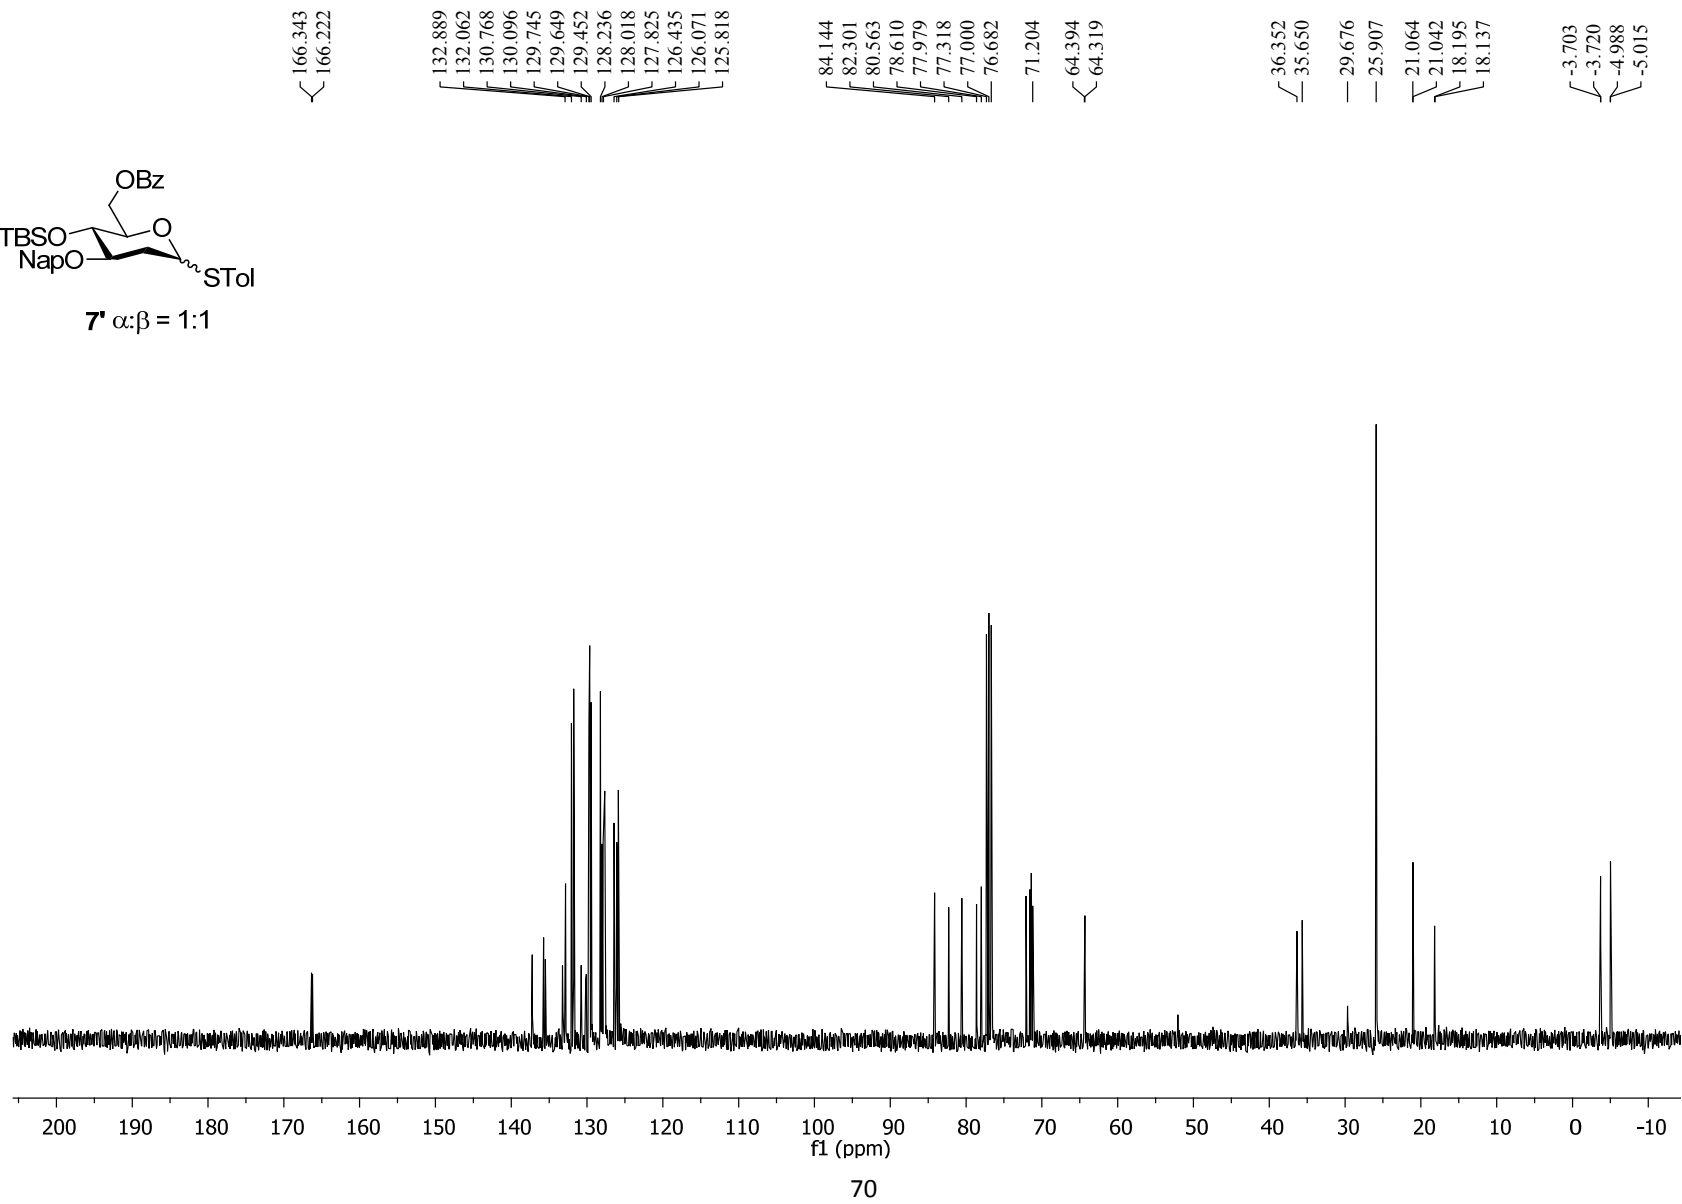

8.802  
8.801  
8.793  
8.791  
8.038  
8.022  
7.839  
7.832  
7.828  
7.824  
7.817  
7.813  
7.807  
7.801  
7.797  
7.779  
7.771  
7.766  
7.759  
7.510  
7.507  
7.500  
7.498  
7.494  
7.492  
7.483  
7.477  
7.471  
7.464  
7.454  
7.451  
7.371  
7.355  
7.302  
7.286  
7.273  
7.269  
7.258  
7.242  
7.229  
6.923  
6.907  
4.995  
4.973  
4.878  
4.855  
4.781  
4.758  
4.707  
4.704  
4.695  
4.683  
4.679  
4.673  
4.660  
4.655  
4.616  
4.604  
4.592  
4.580  
3.684  
3.679  
3.548  
3.531  
3.512  
2.250  
1.839  
1.814

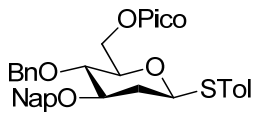

8

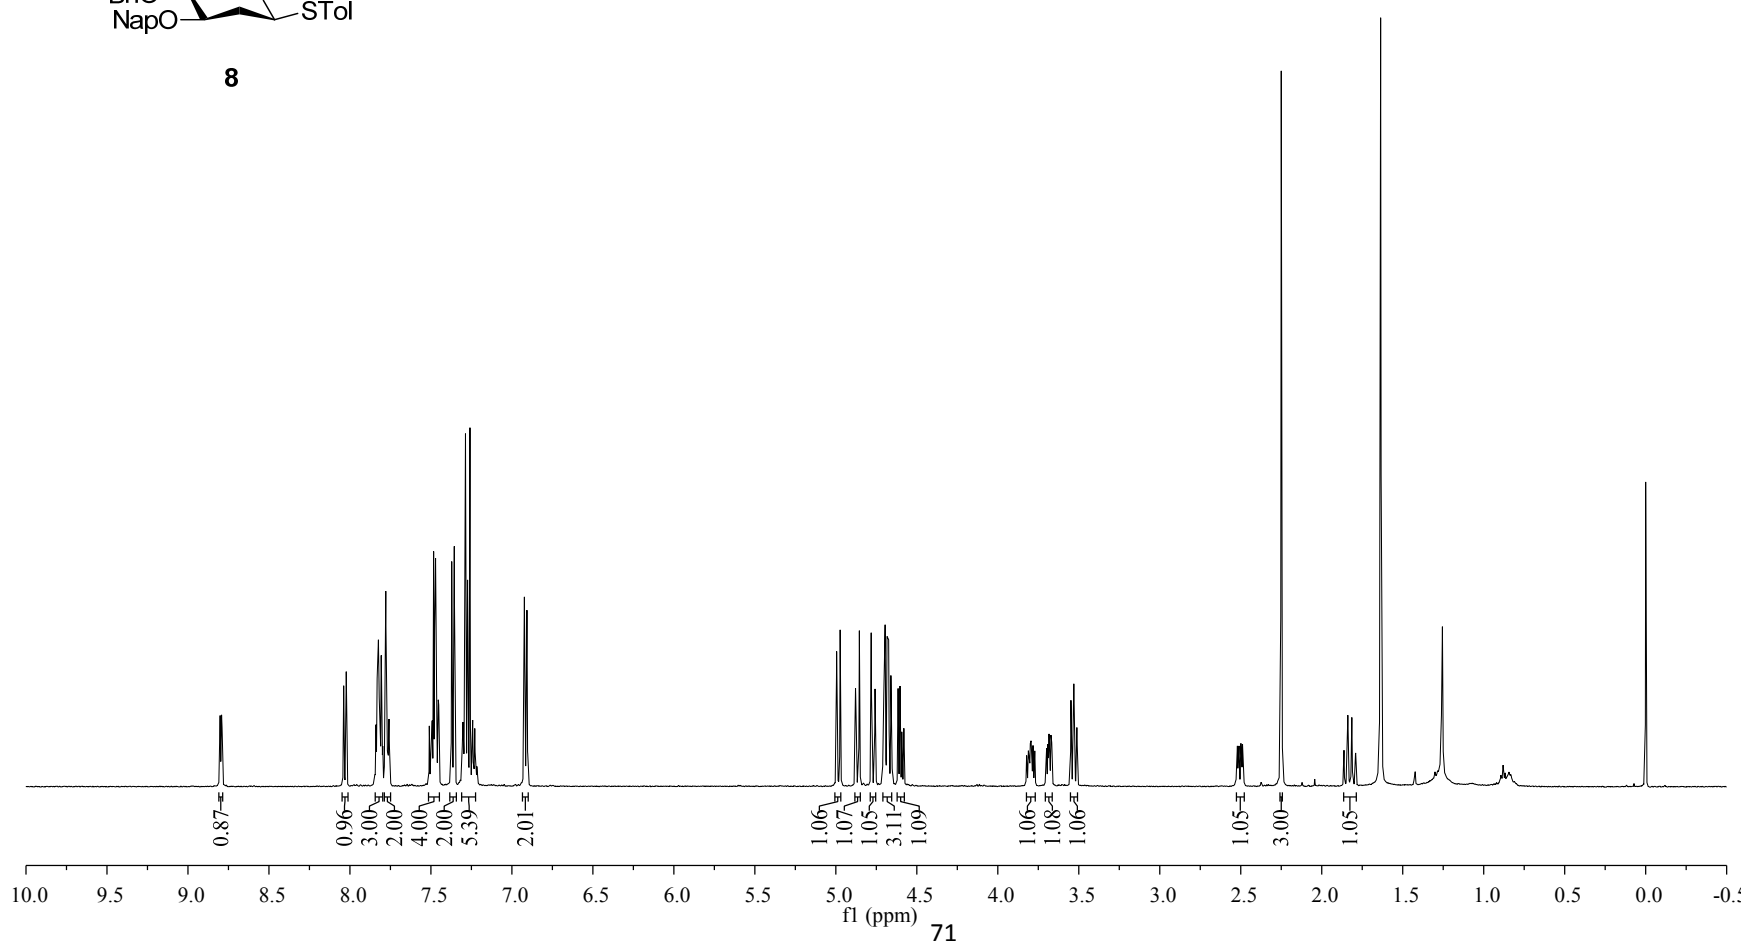

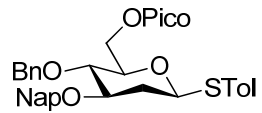

8

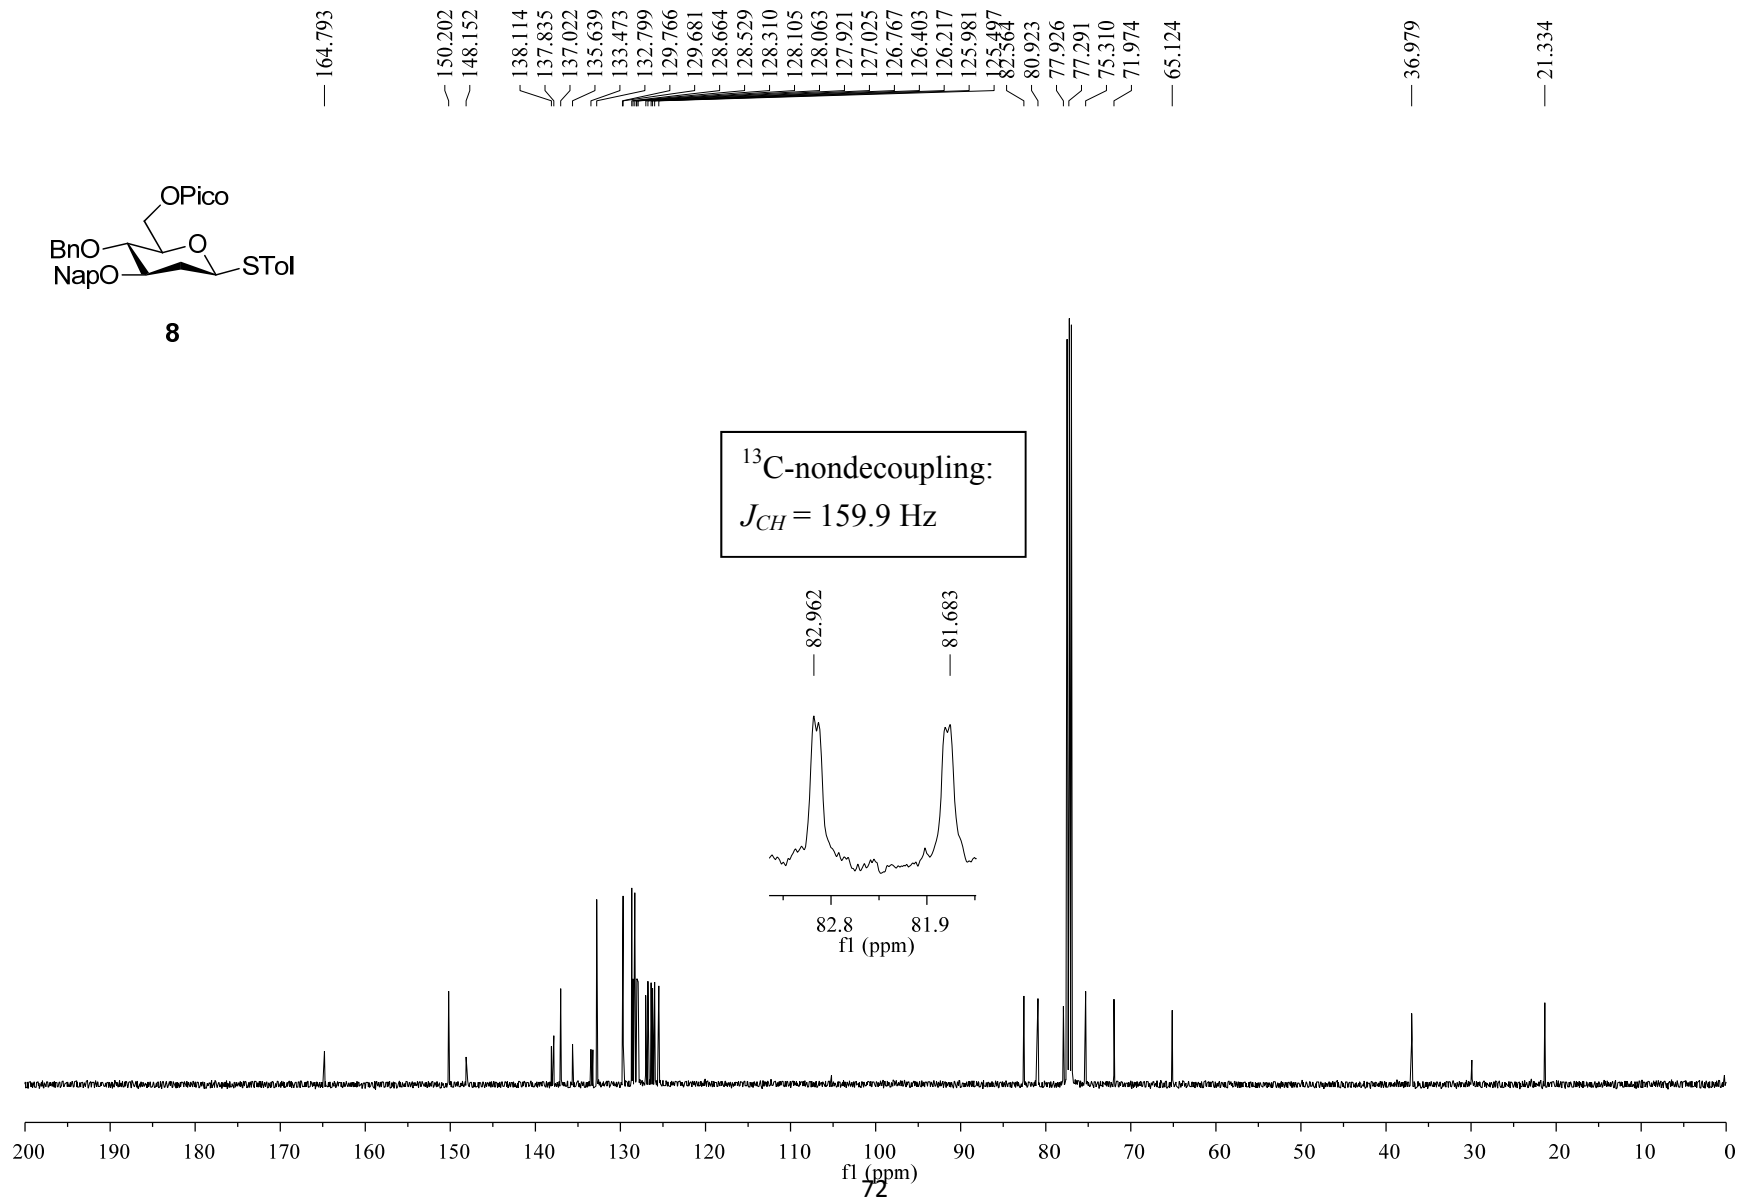



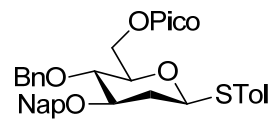

**8**

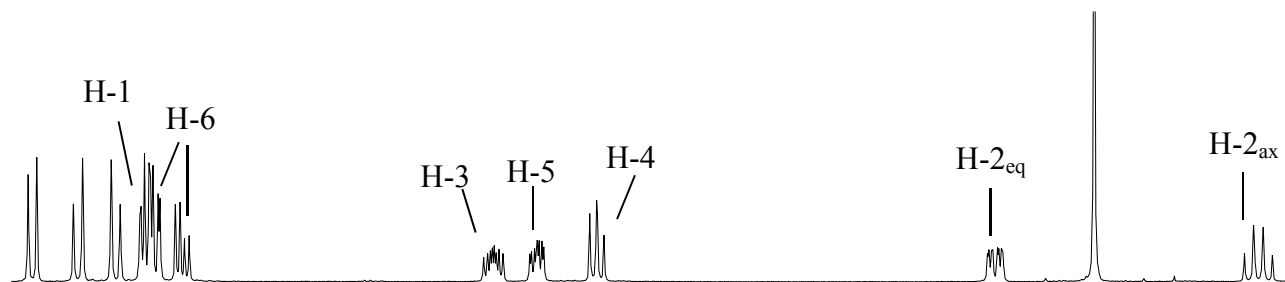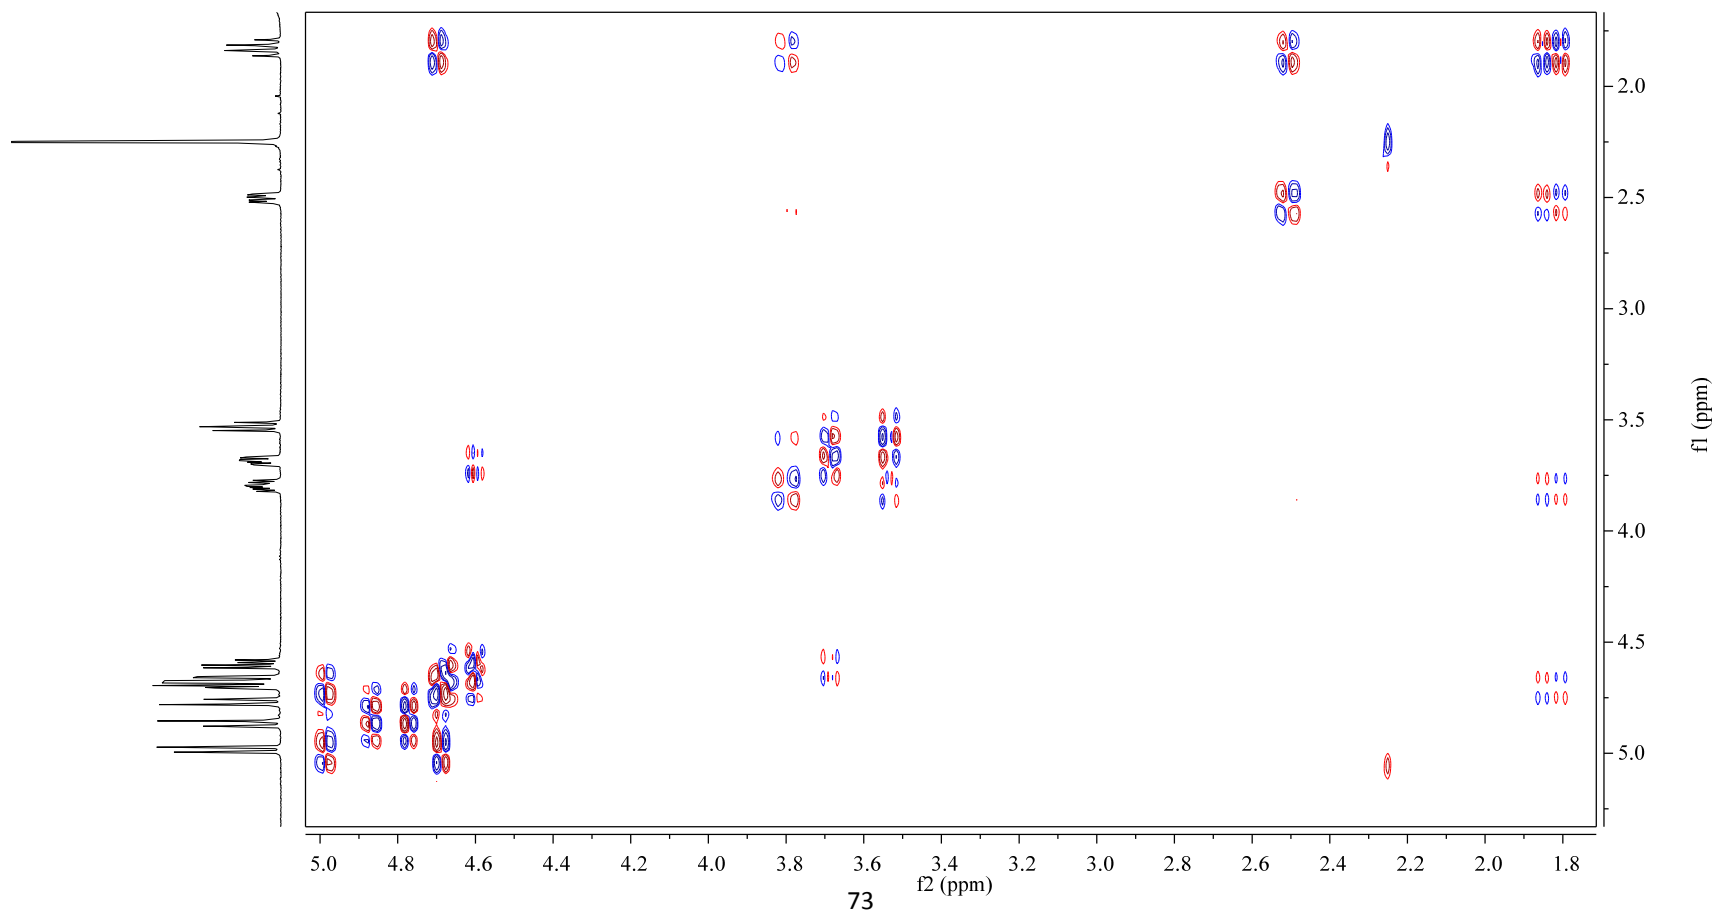

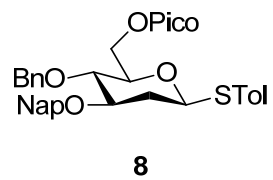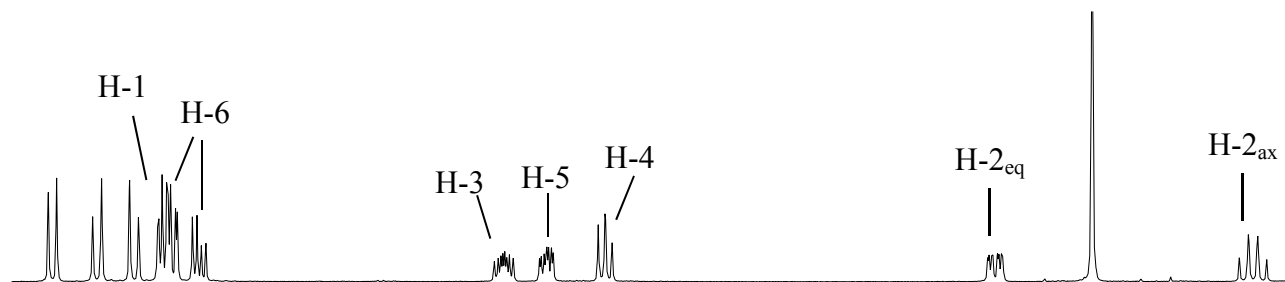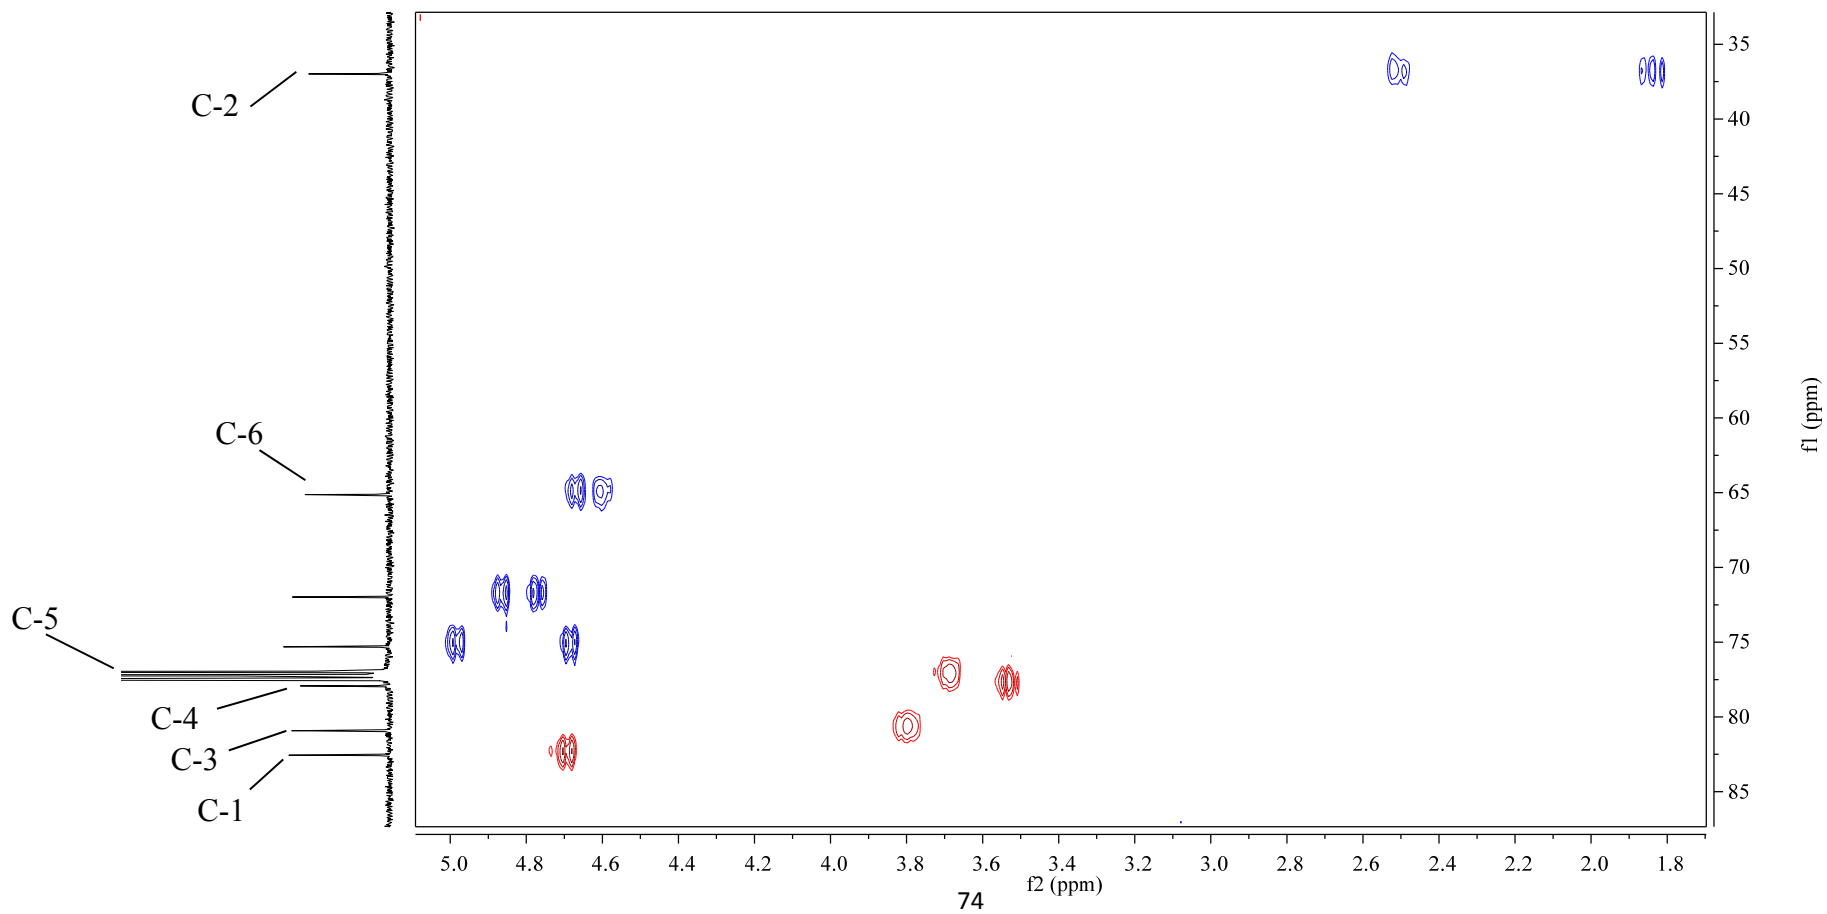

8.767  
8.765  
8.762  
8.751  
8.749  
8.747  
8.745  
8.739  
8.737  
8.735  
8.693  
7.932  
7.775  
7.741  
7.700  
7.482  
7.191  
6.922  
6.907  
6.903  
6.887

5.594  
5.582  
5.440  
4.801  
4.705  
4.674  
4.617  
4.582  
4.563  
4.108  
4.072  
3.784  
3.695  
3.671  
3.650  
3.575  
3.496  
3.329  
2.508  
2.482  
2.465  
2.184  
2.141  
2.016  
1.774

1.259  
1.250  
1.232  
1.214  
0.098  
-0.000

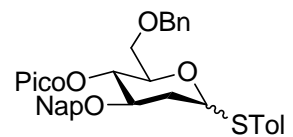

8'  $\alpha:\beta = 1:1$

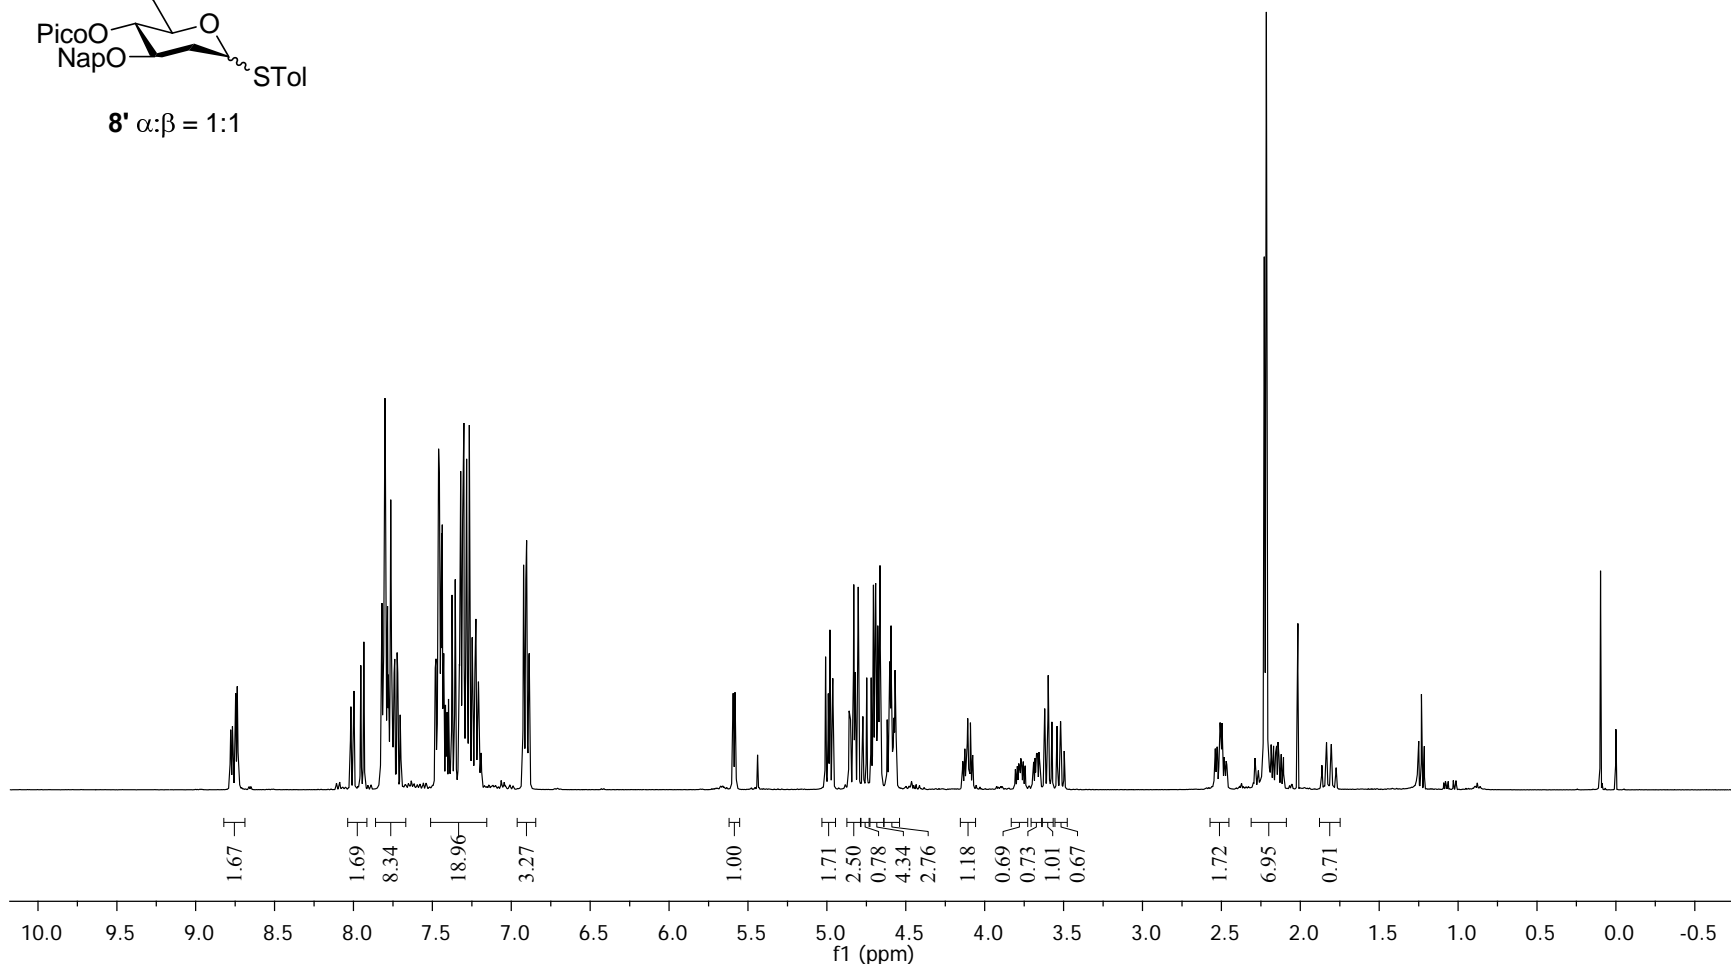

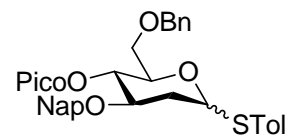

$\delta'$   $\alpha:\beta = 1:1$

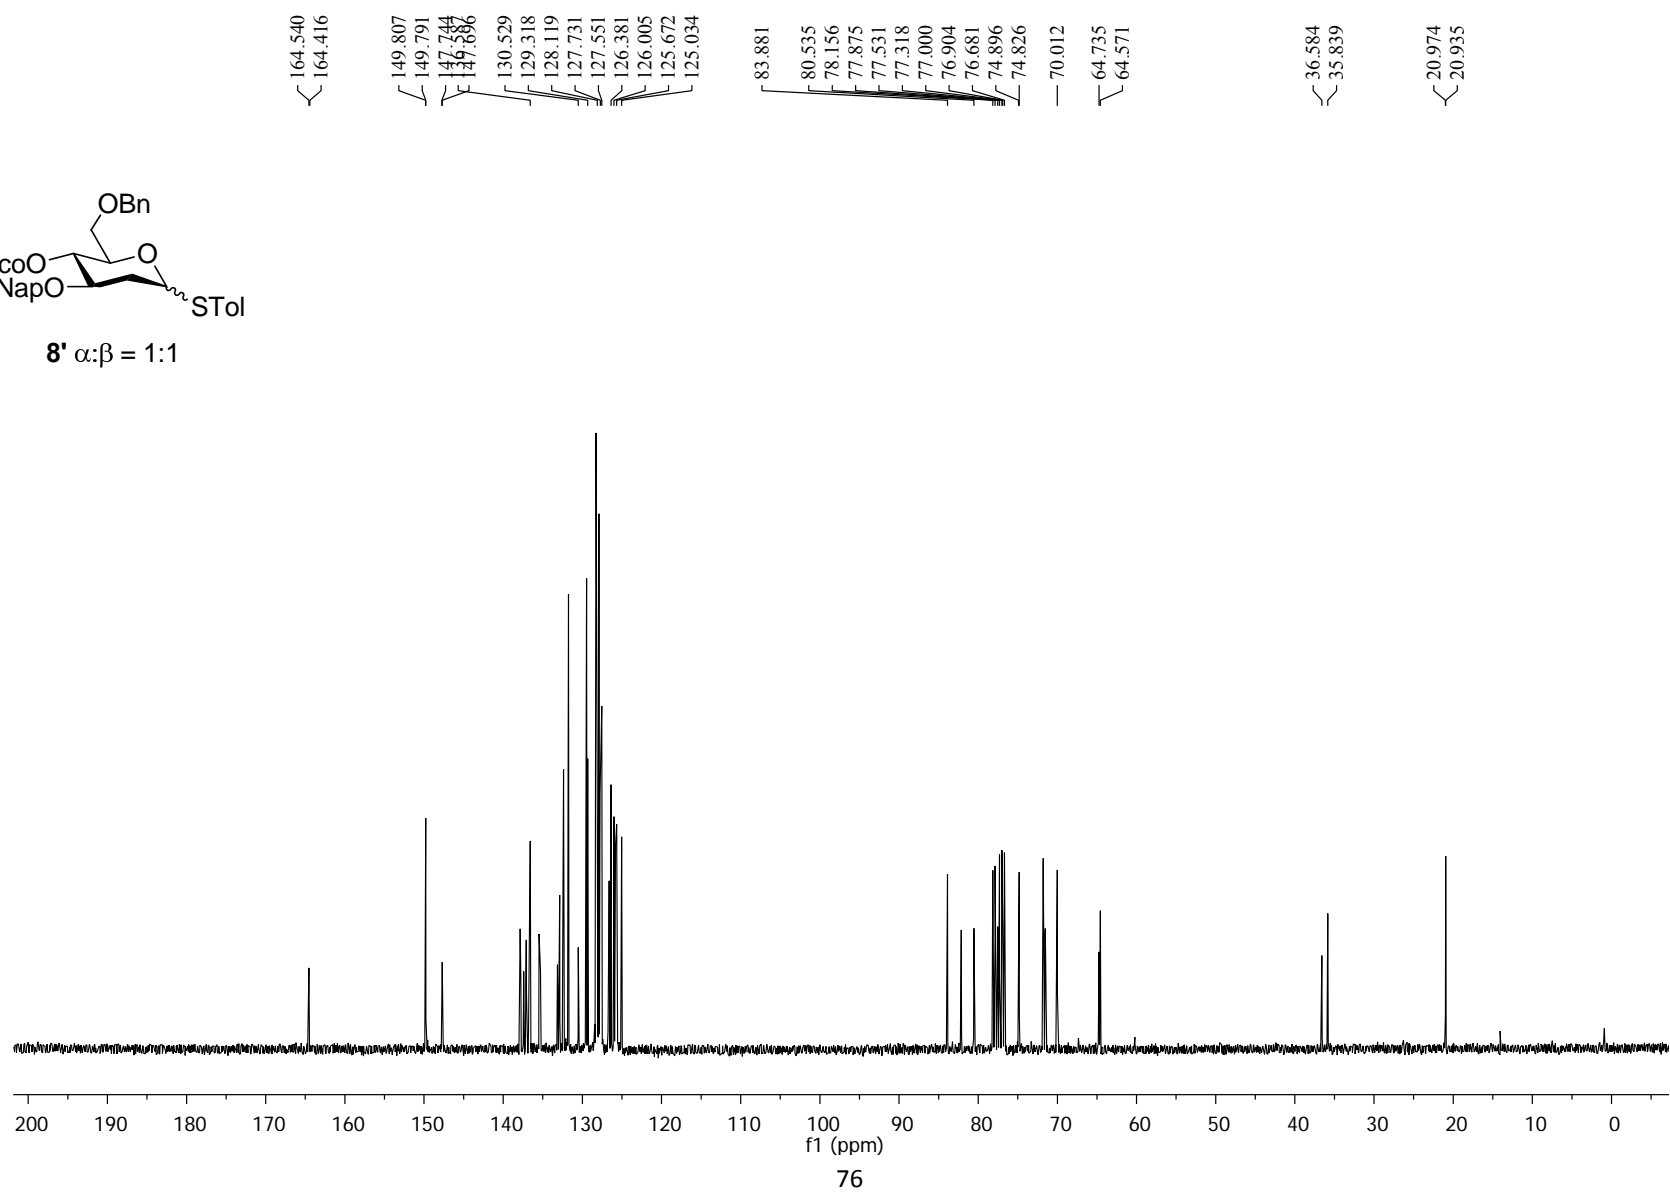

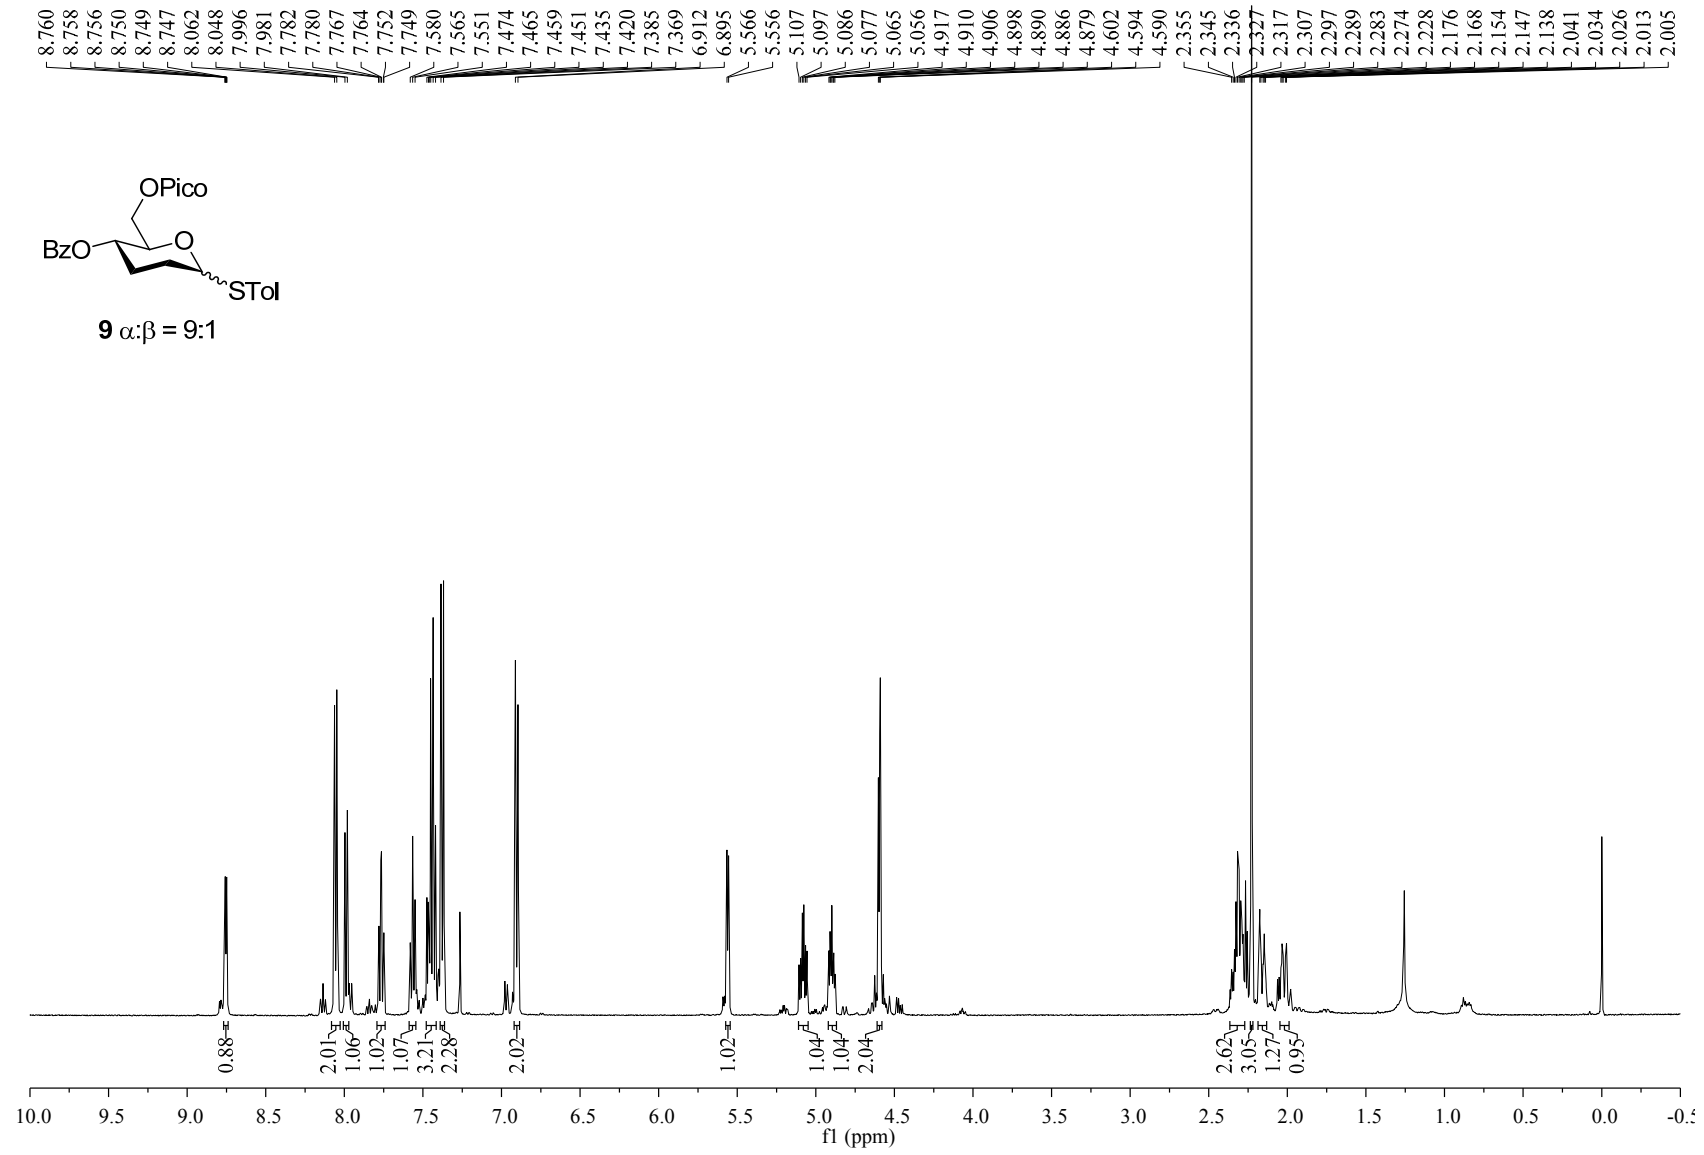

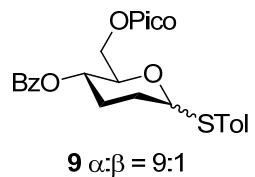

165.750  
164.863

150.077  
147.943  
137.320  
136.993  
133.462  
132.250  
130.741  
129.924  
129.895  
129.774  
128.624  
126.979  
125.489

84.662

69.416  
65.010

29.868  
25.828  
21.275

<sup>13</sup>C-nondecoupling:  
 $J_{CH} = 163.5$  Hz

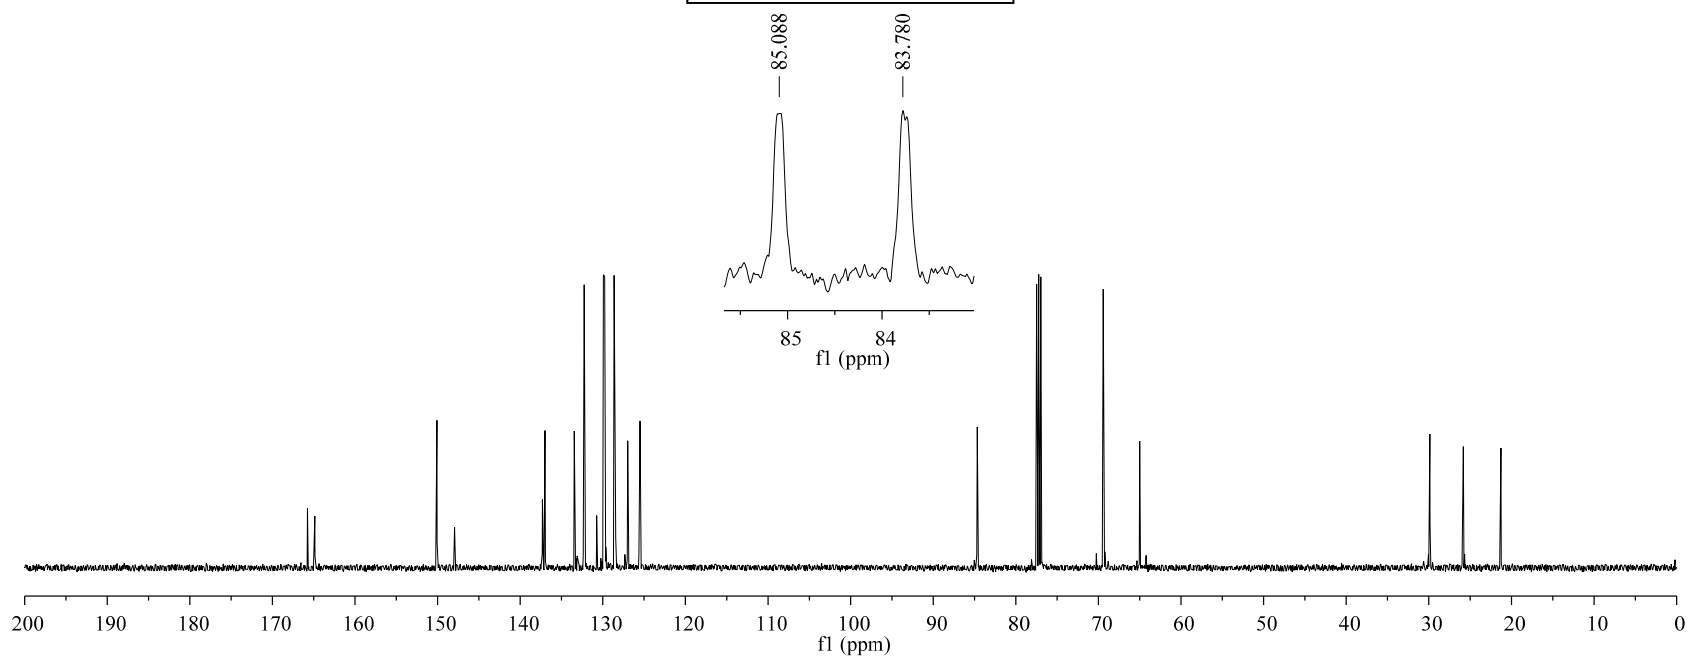

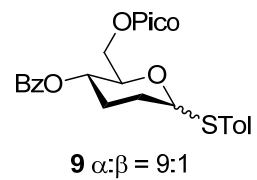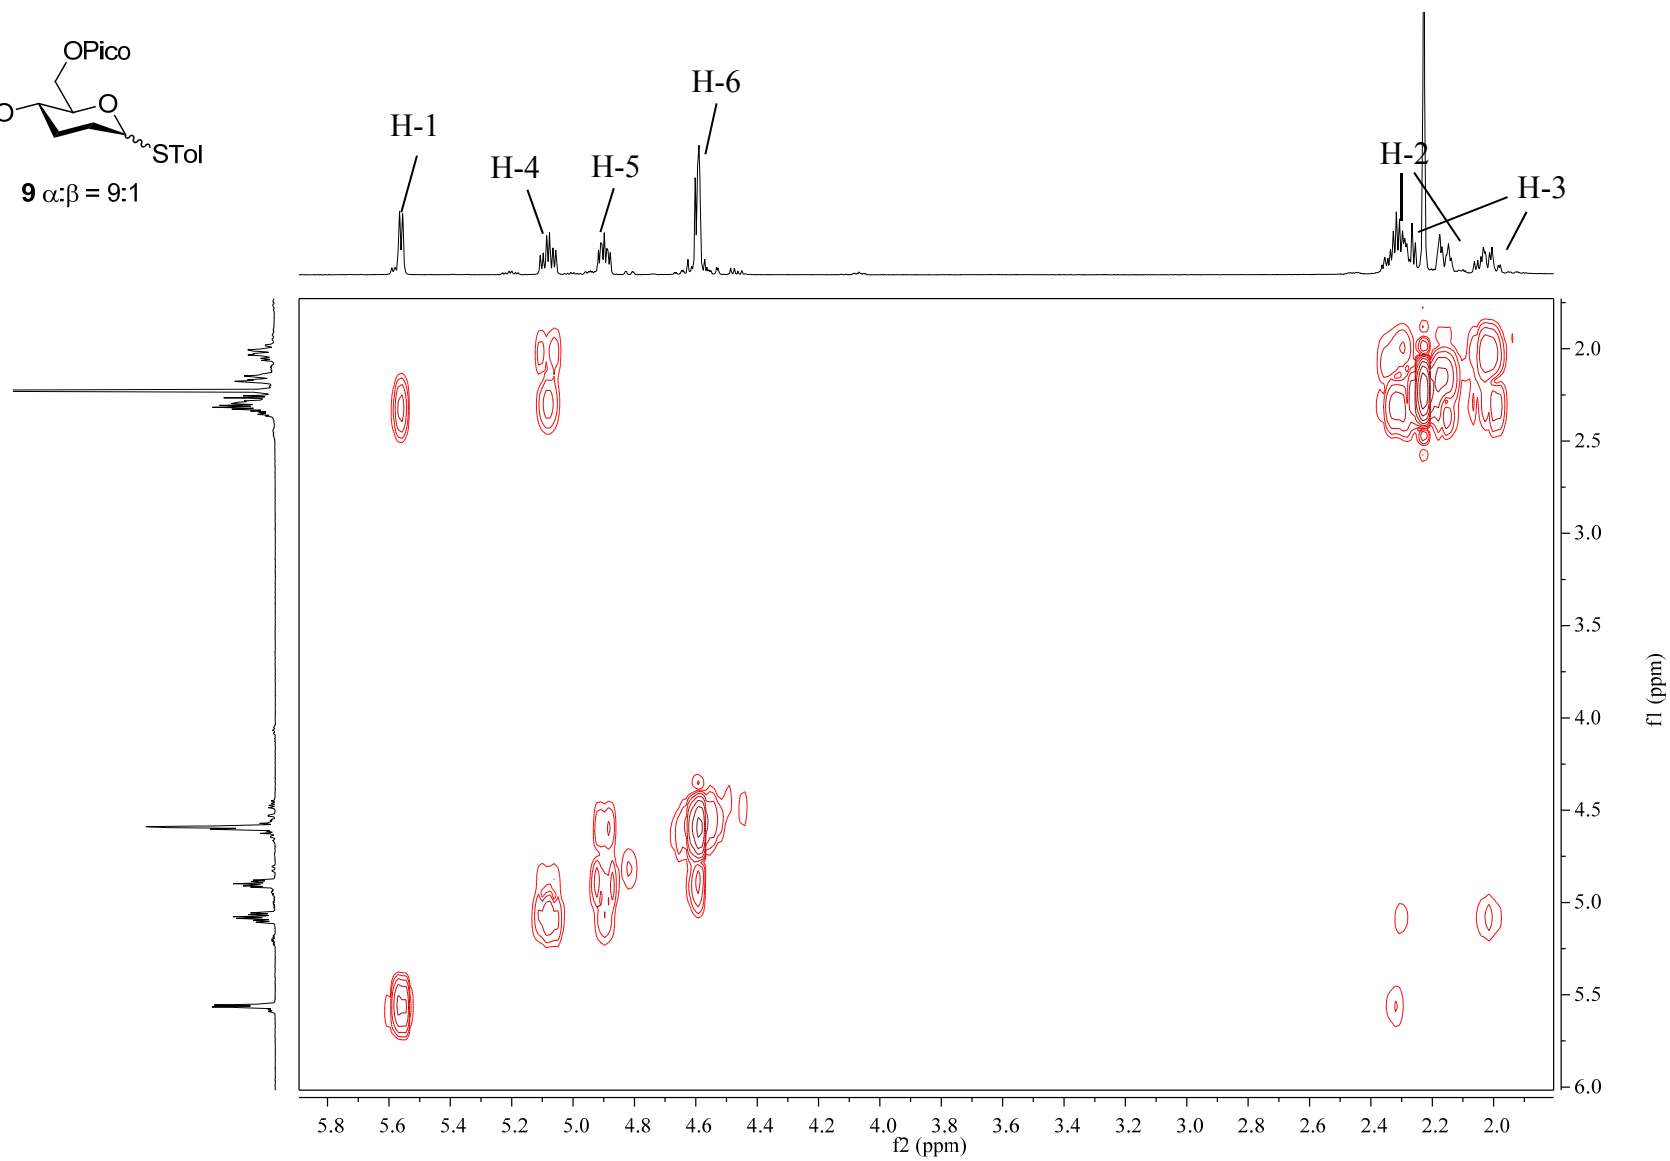

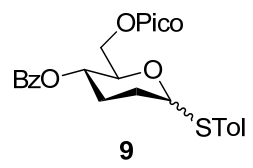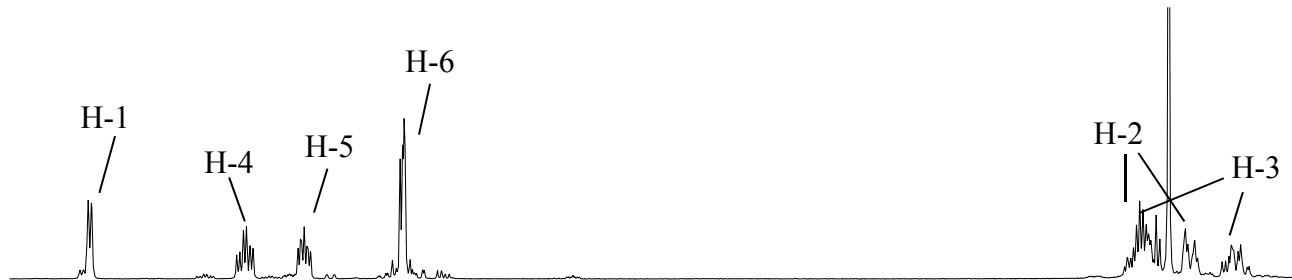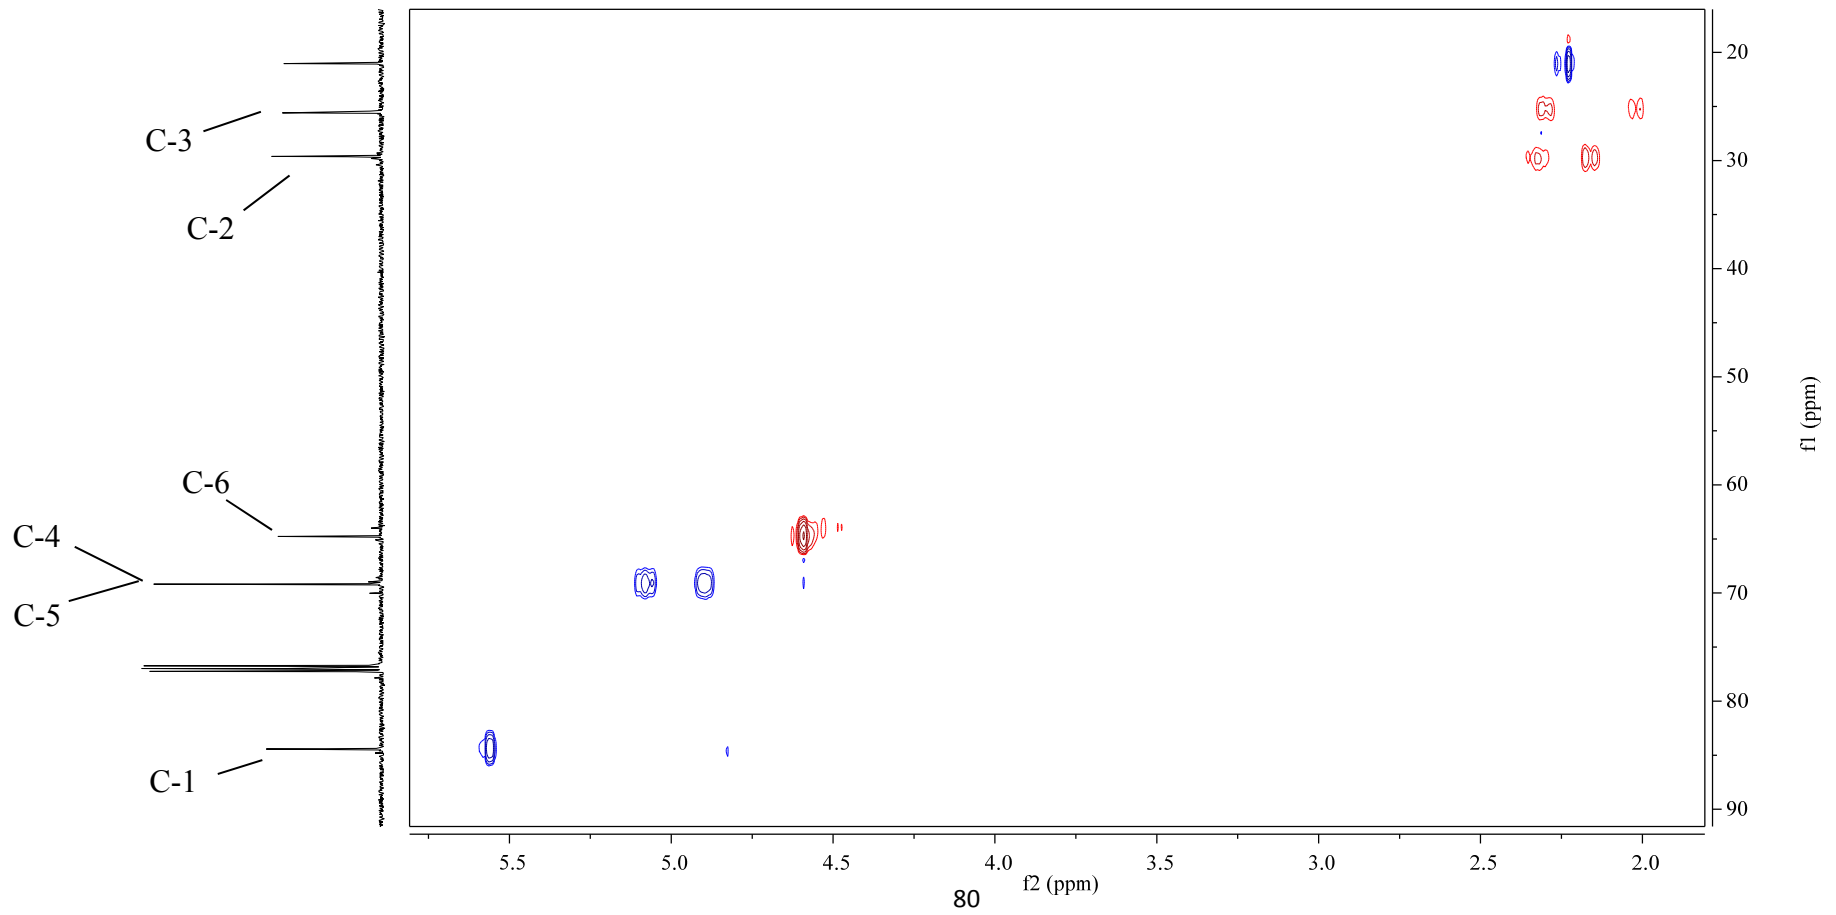



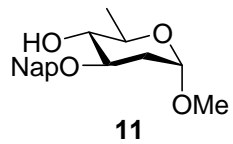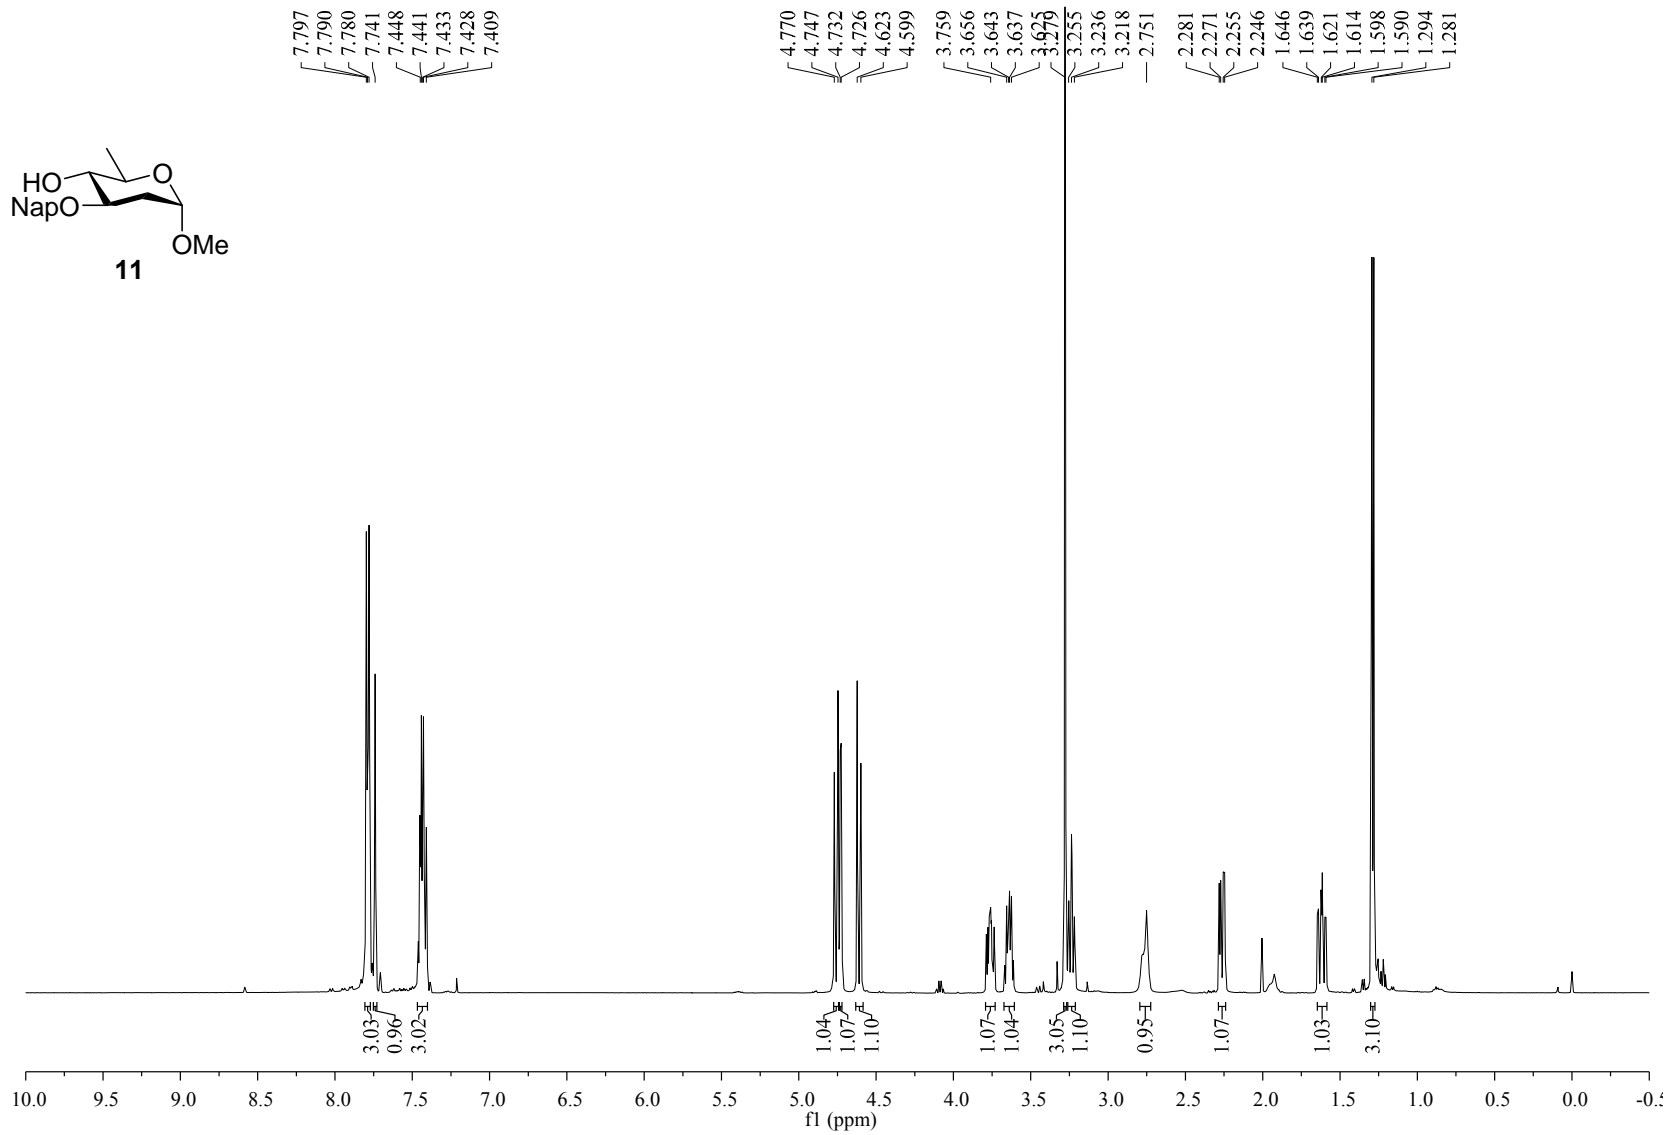

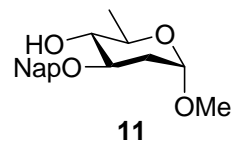

135.983  
 133.405  
 133.116  
 128.433  
 128.010  
 127.830  
 126.534  
 126.288  
 126.064  
 125.776

— 98.549

77.255  
 76.290  
 71.325  
 67.567

— 54.671

— 34.982

— 18.035

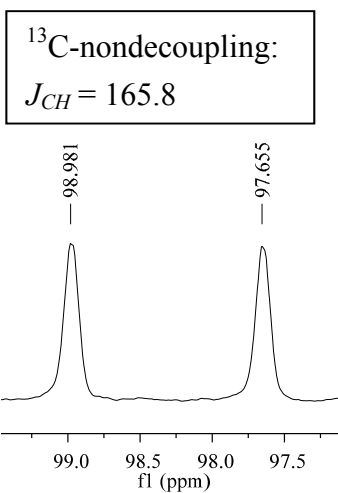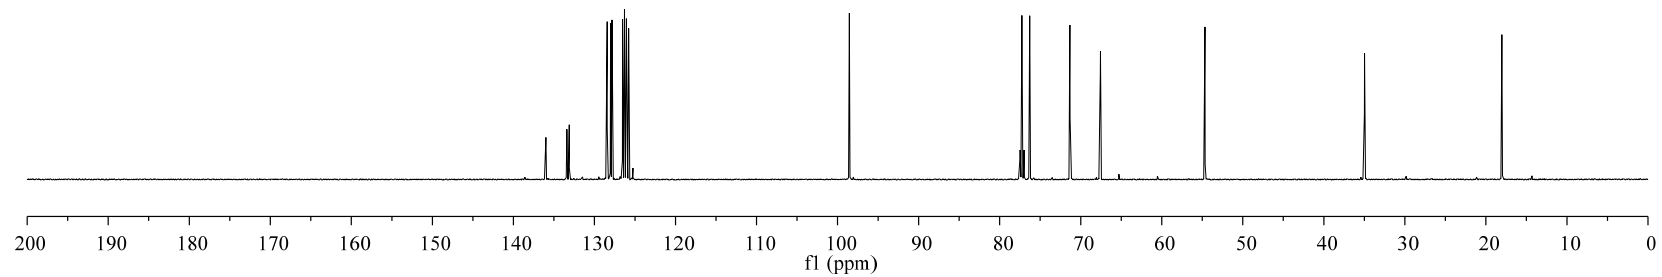

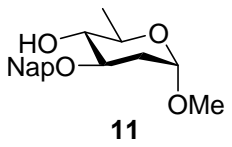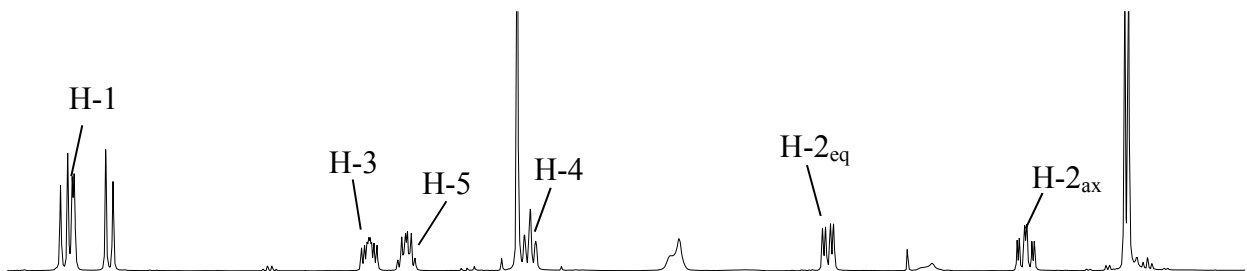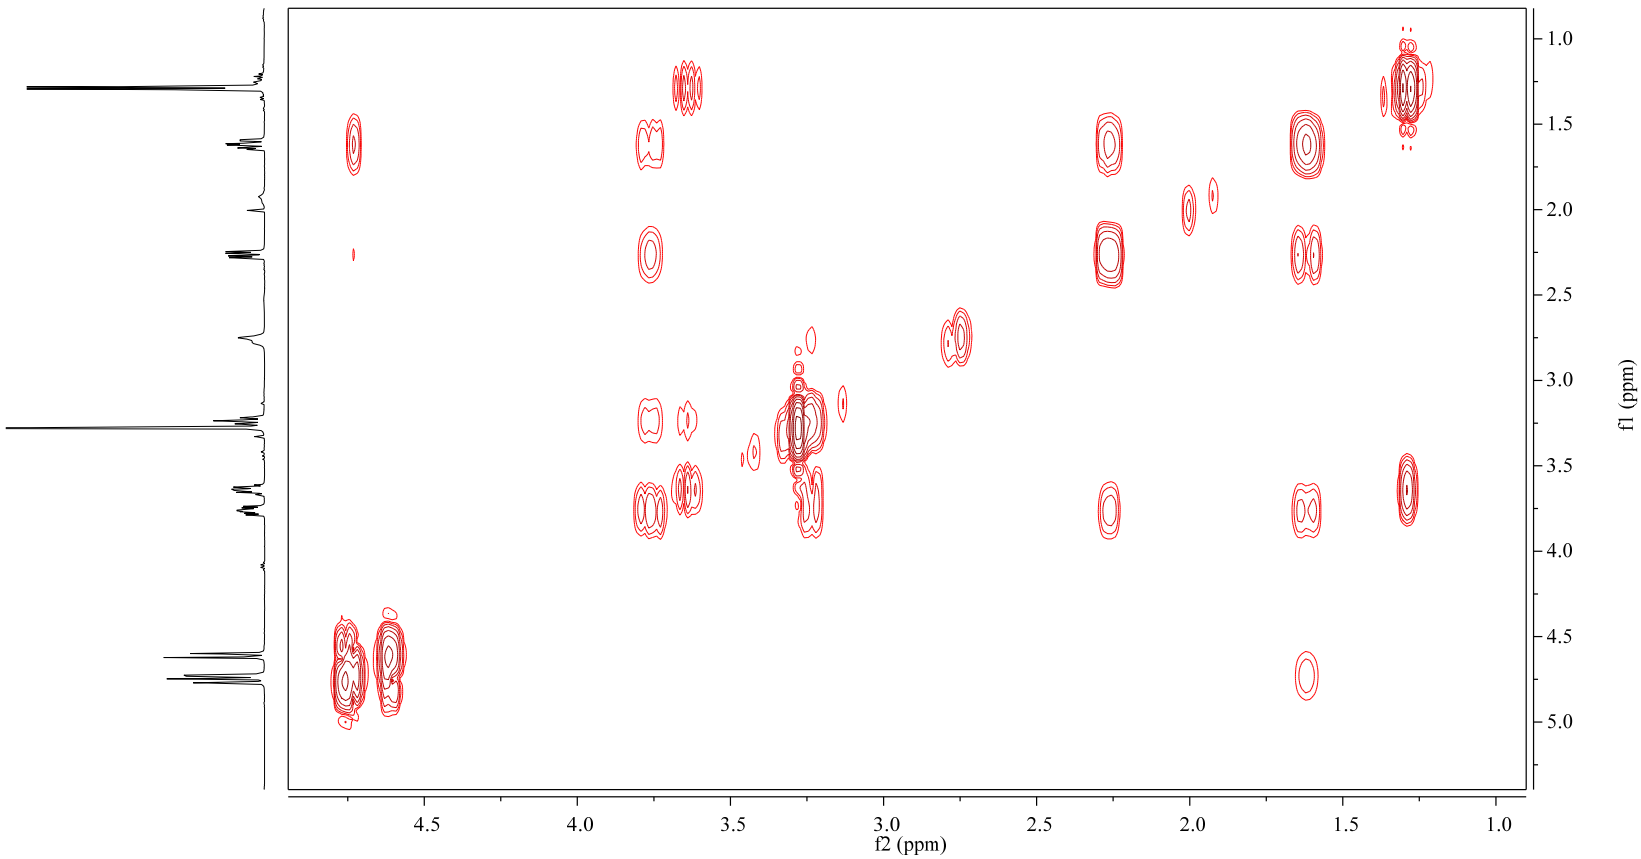

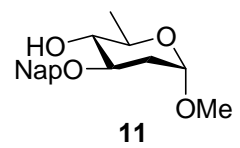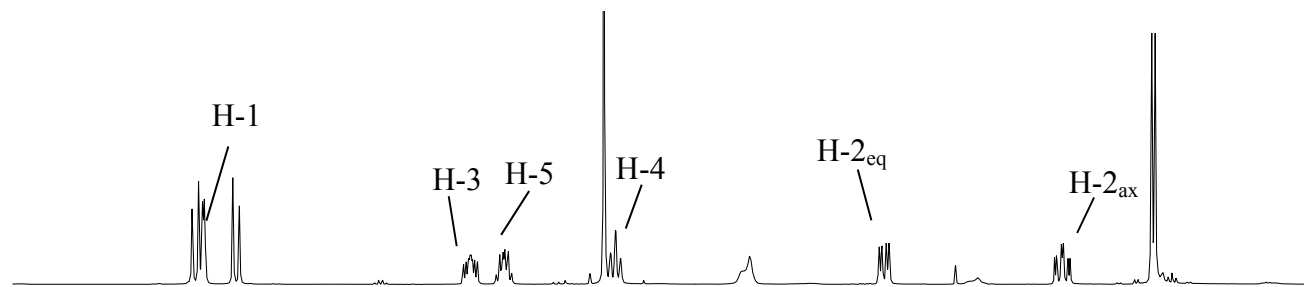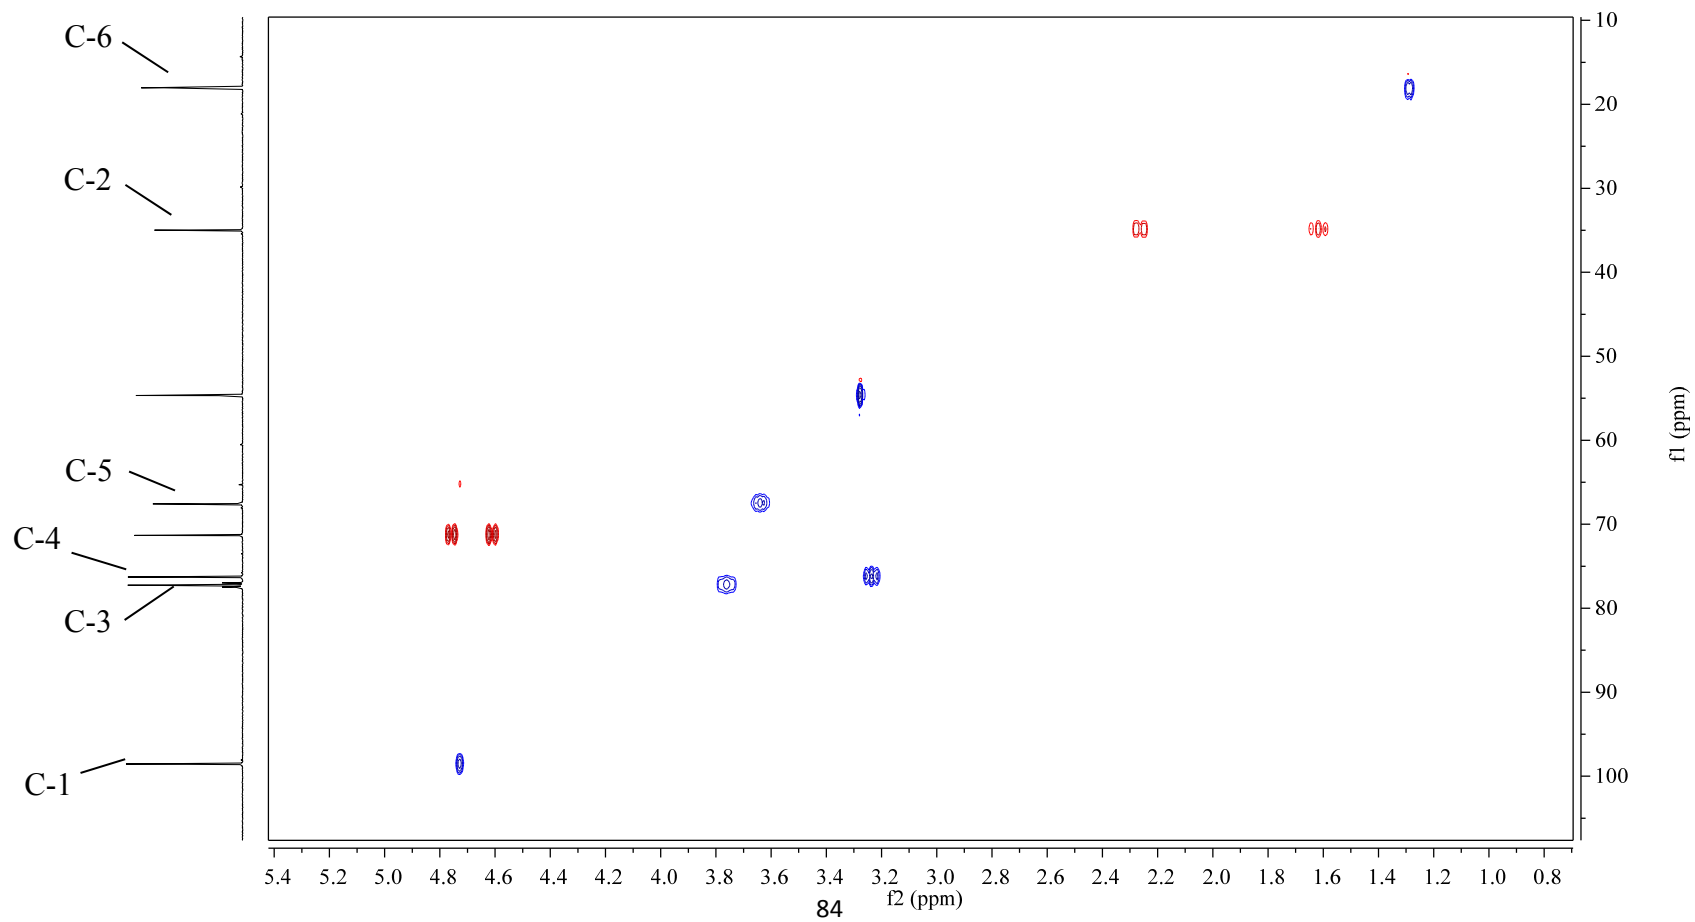

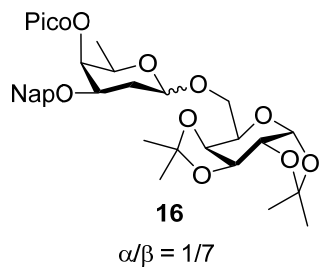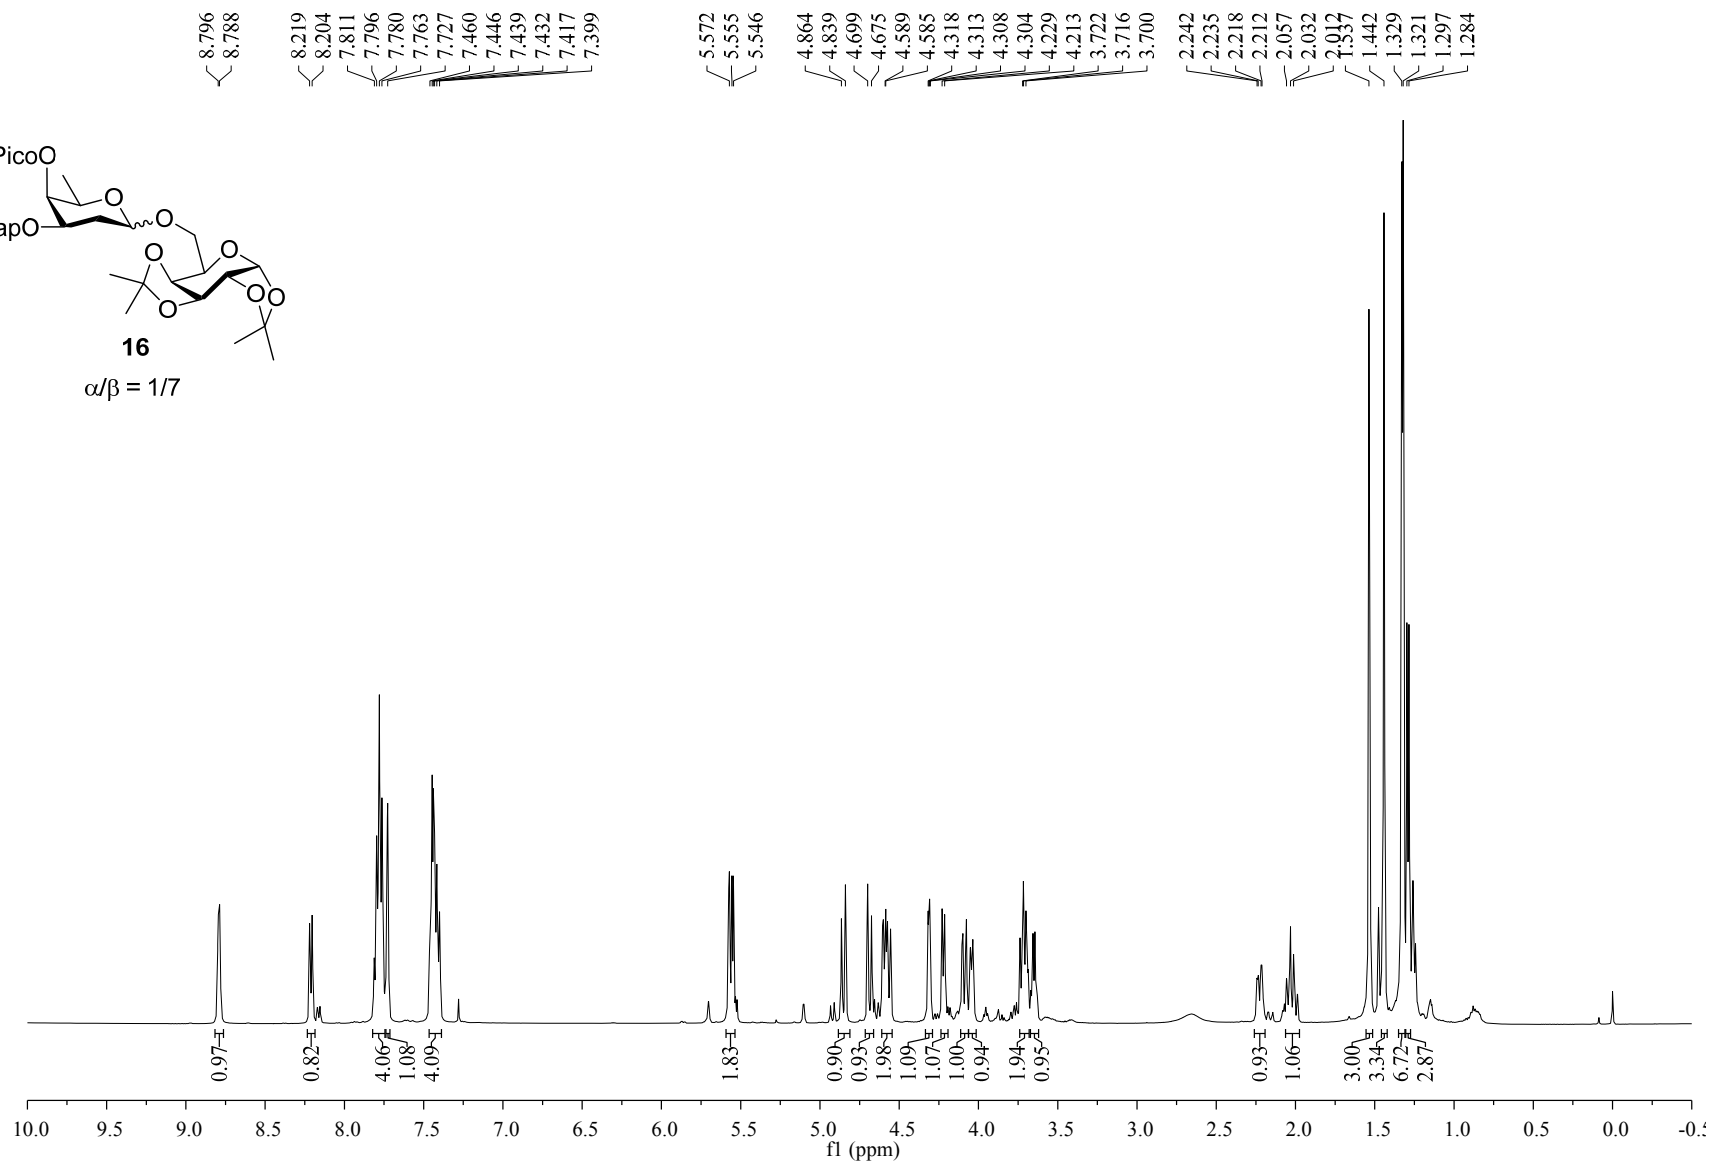

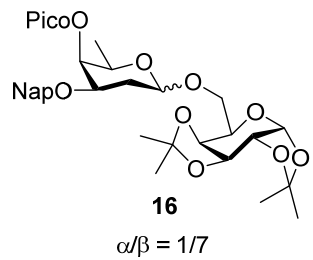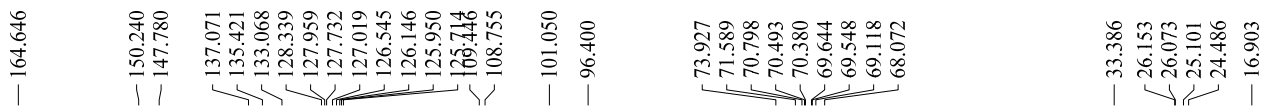

<sup>13</sup>C-nondecoupling:  
 $J_{CH} = 156.8 \text{ Hz}$   
 $J_{CH} = 178.1 \text{ Hz}$

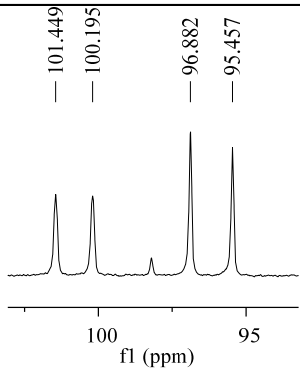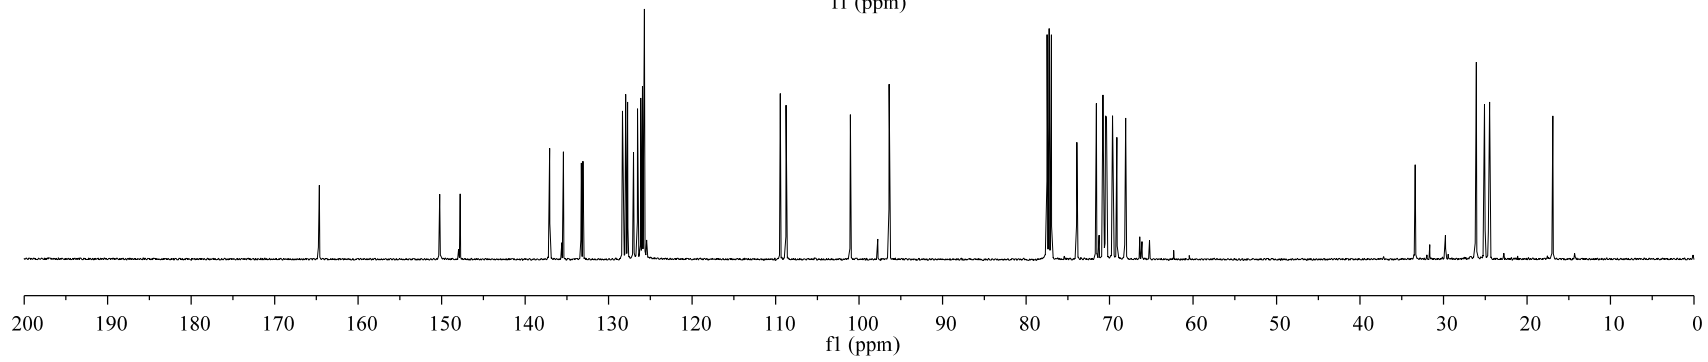

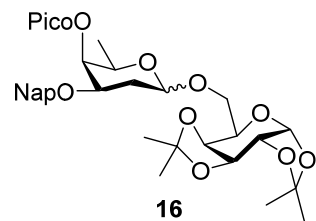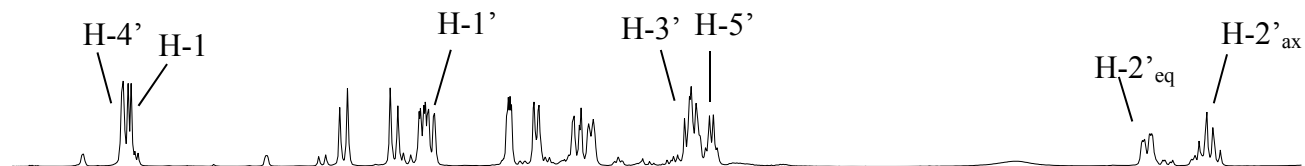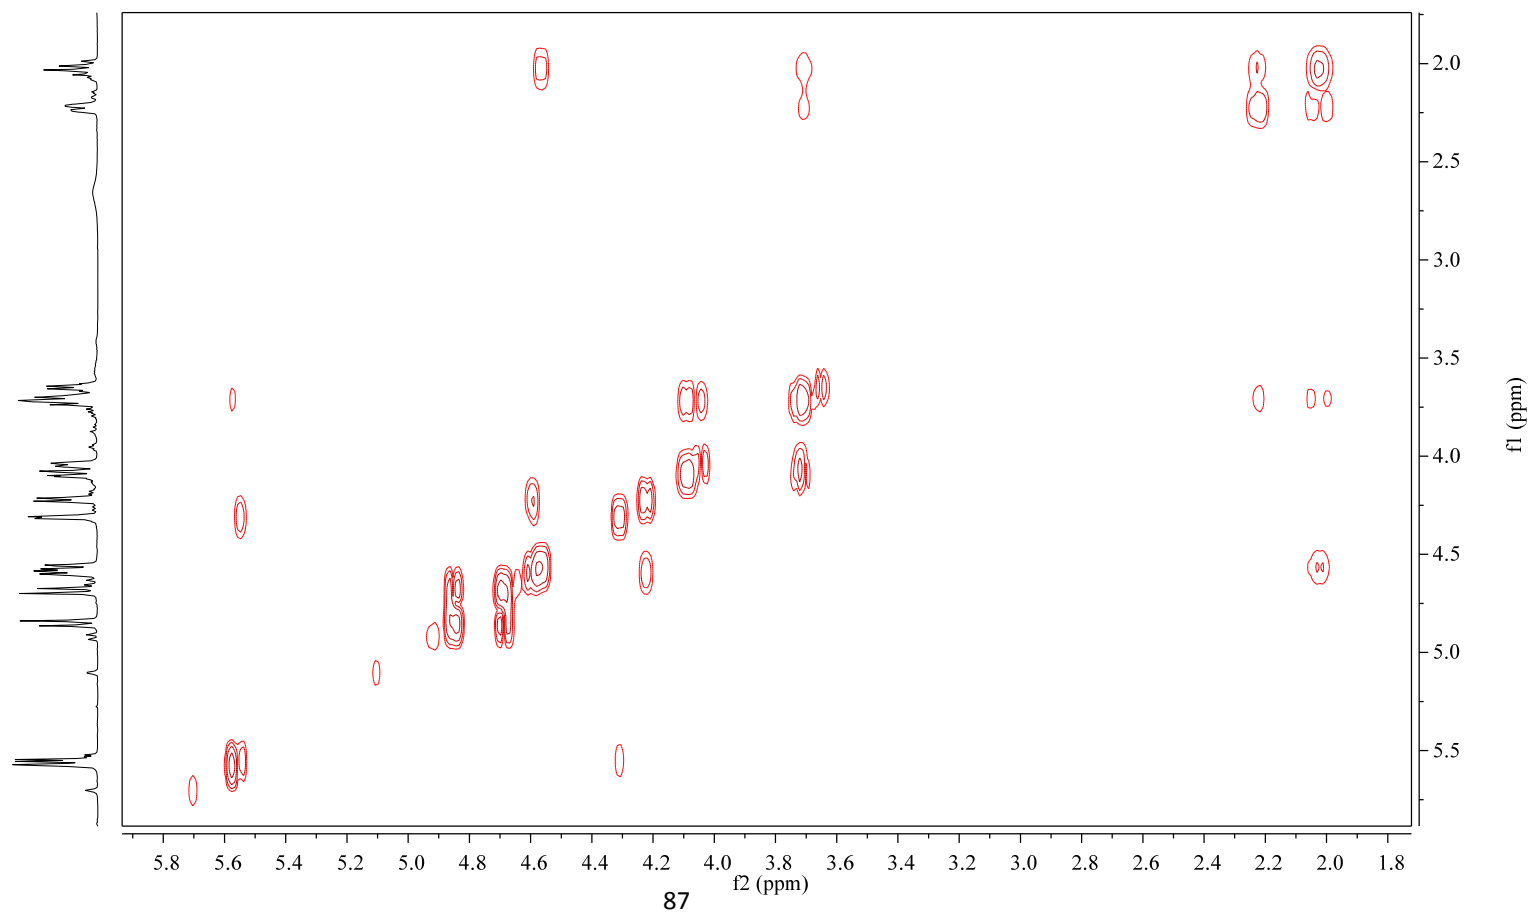

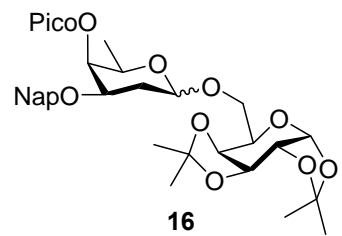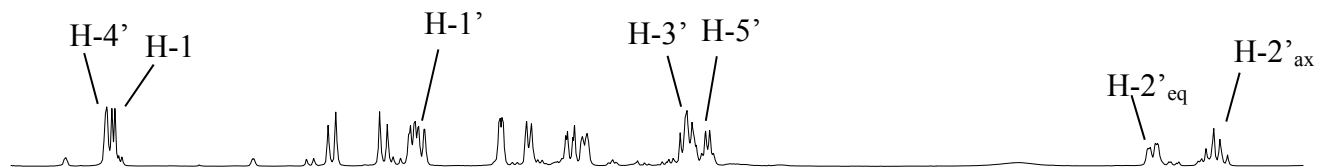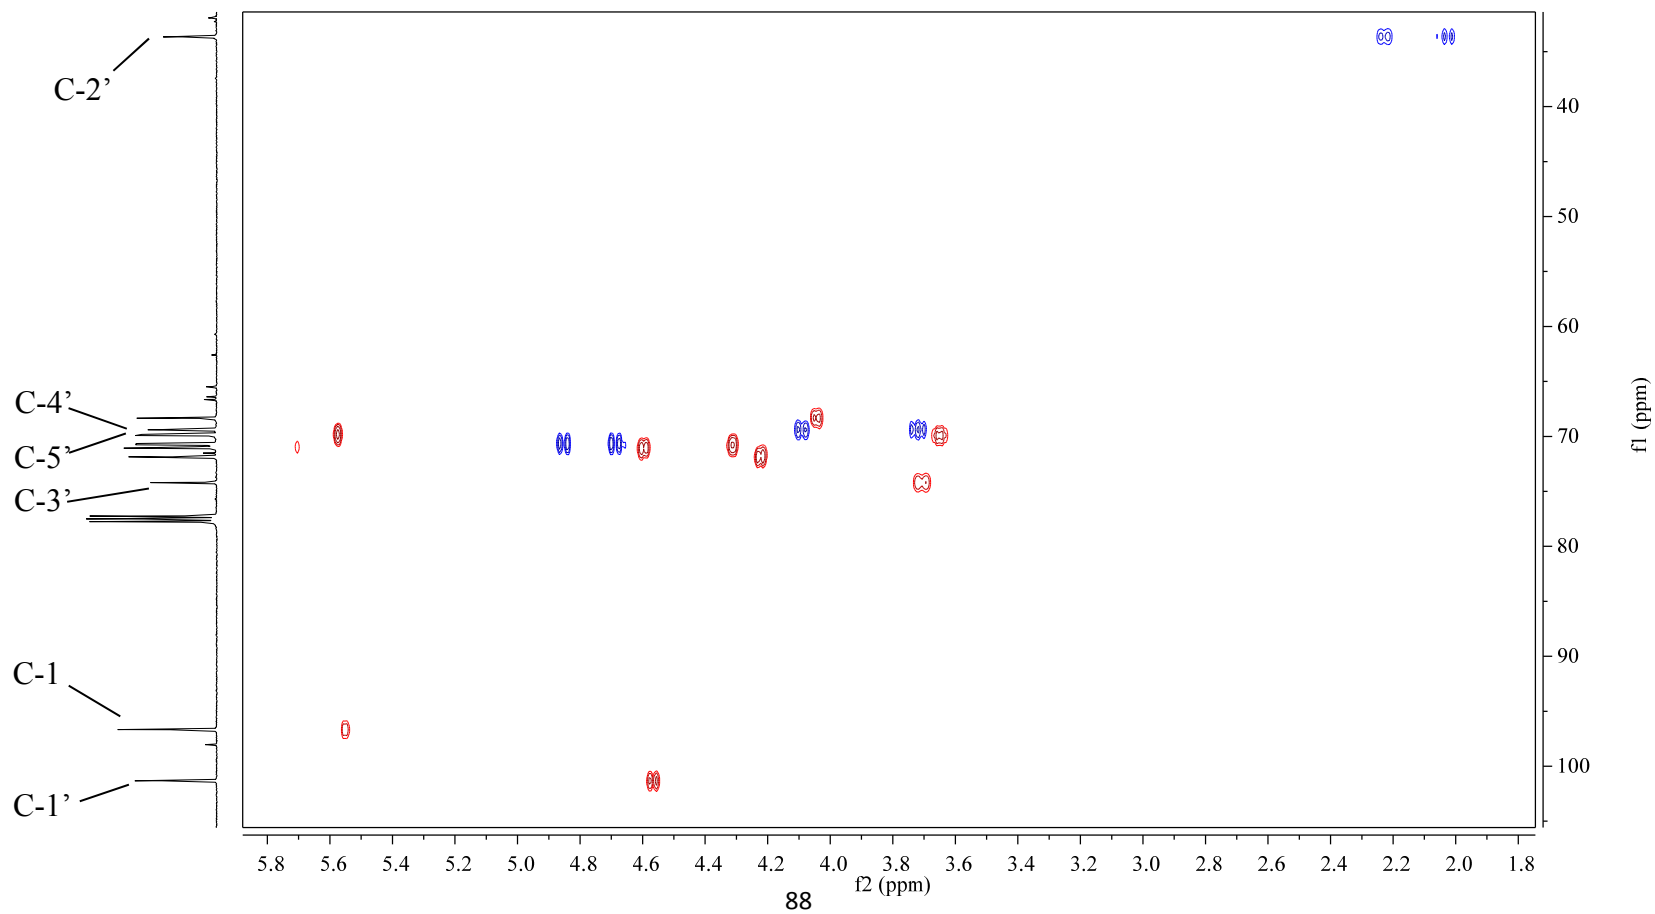



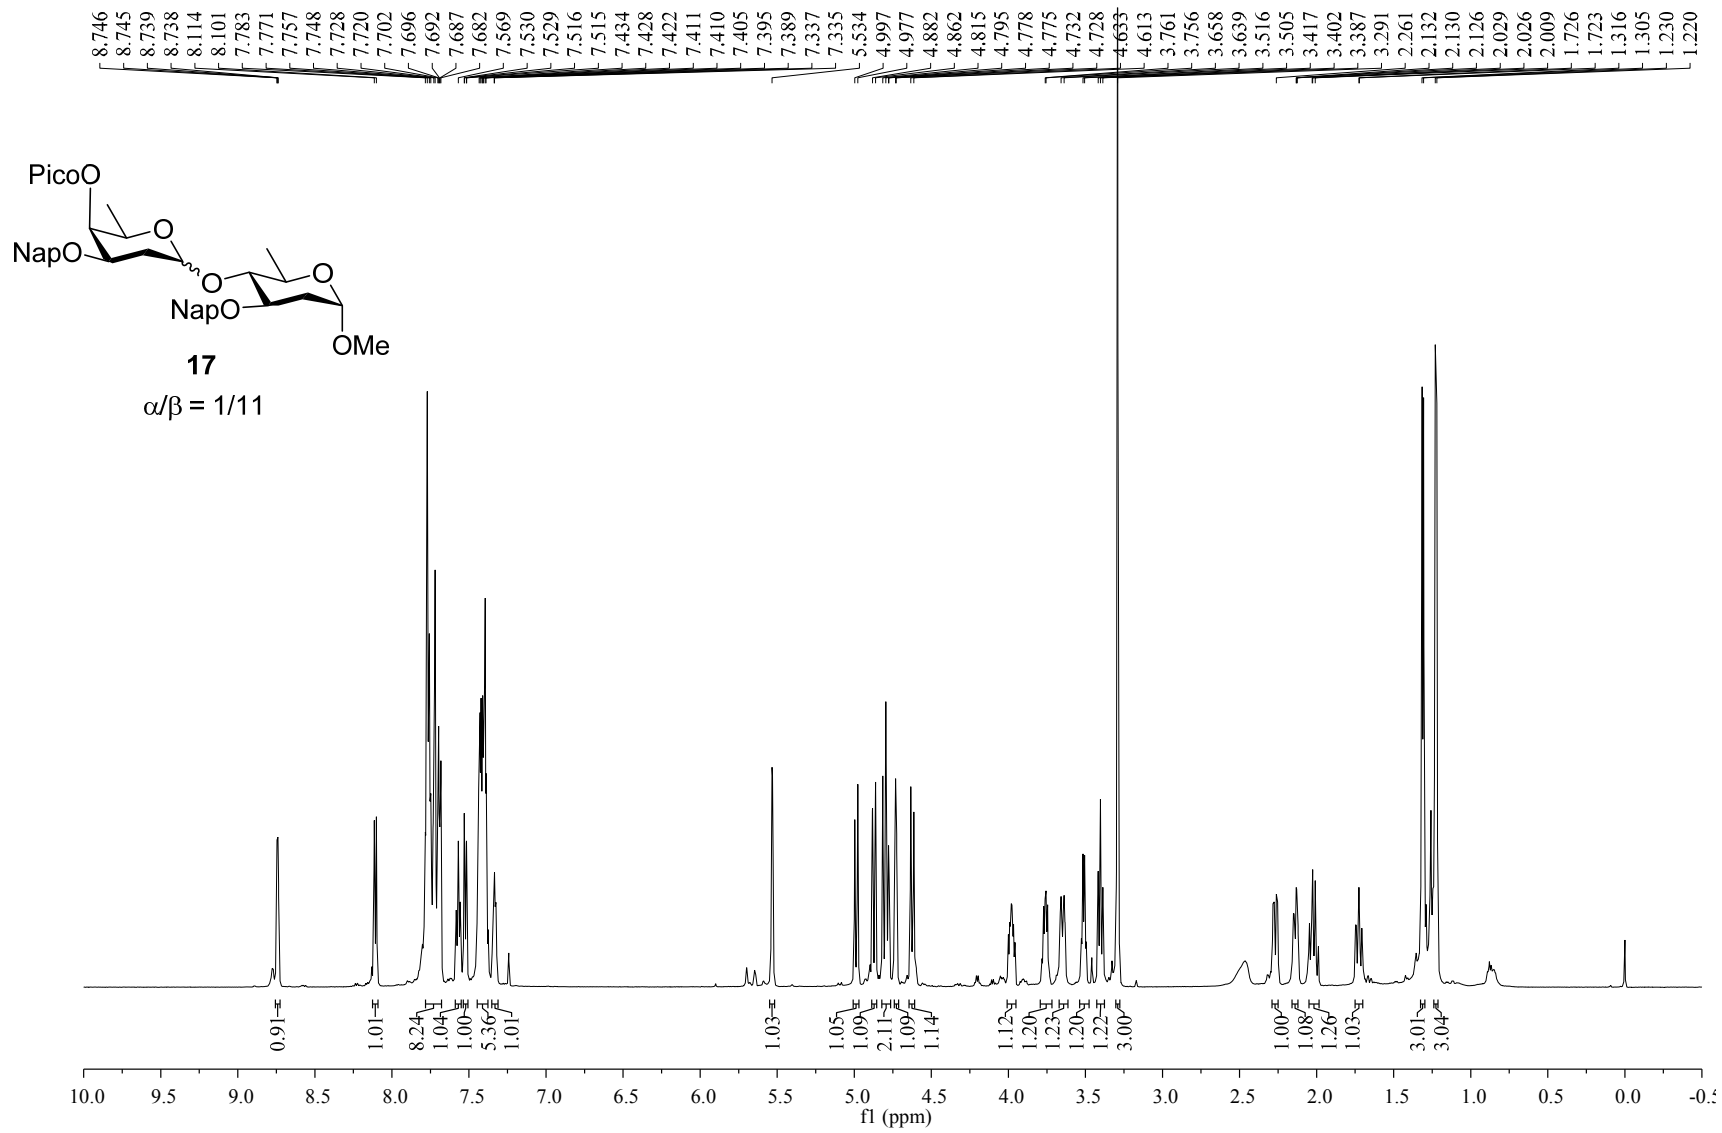

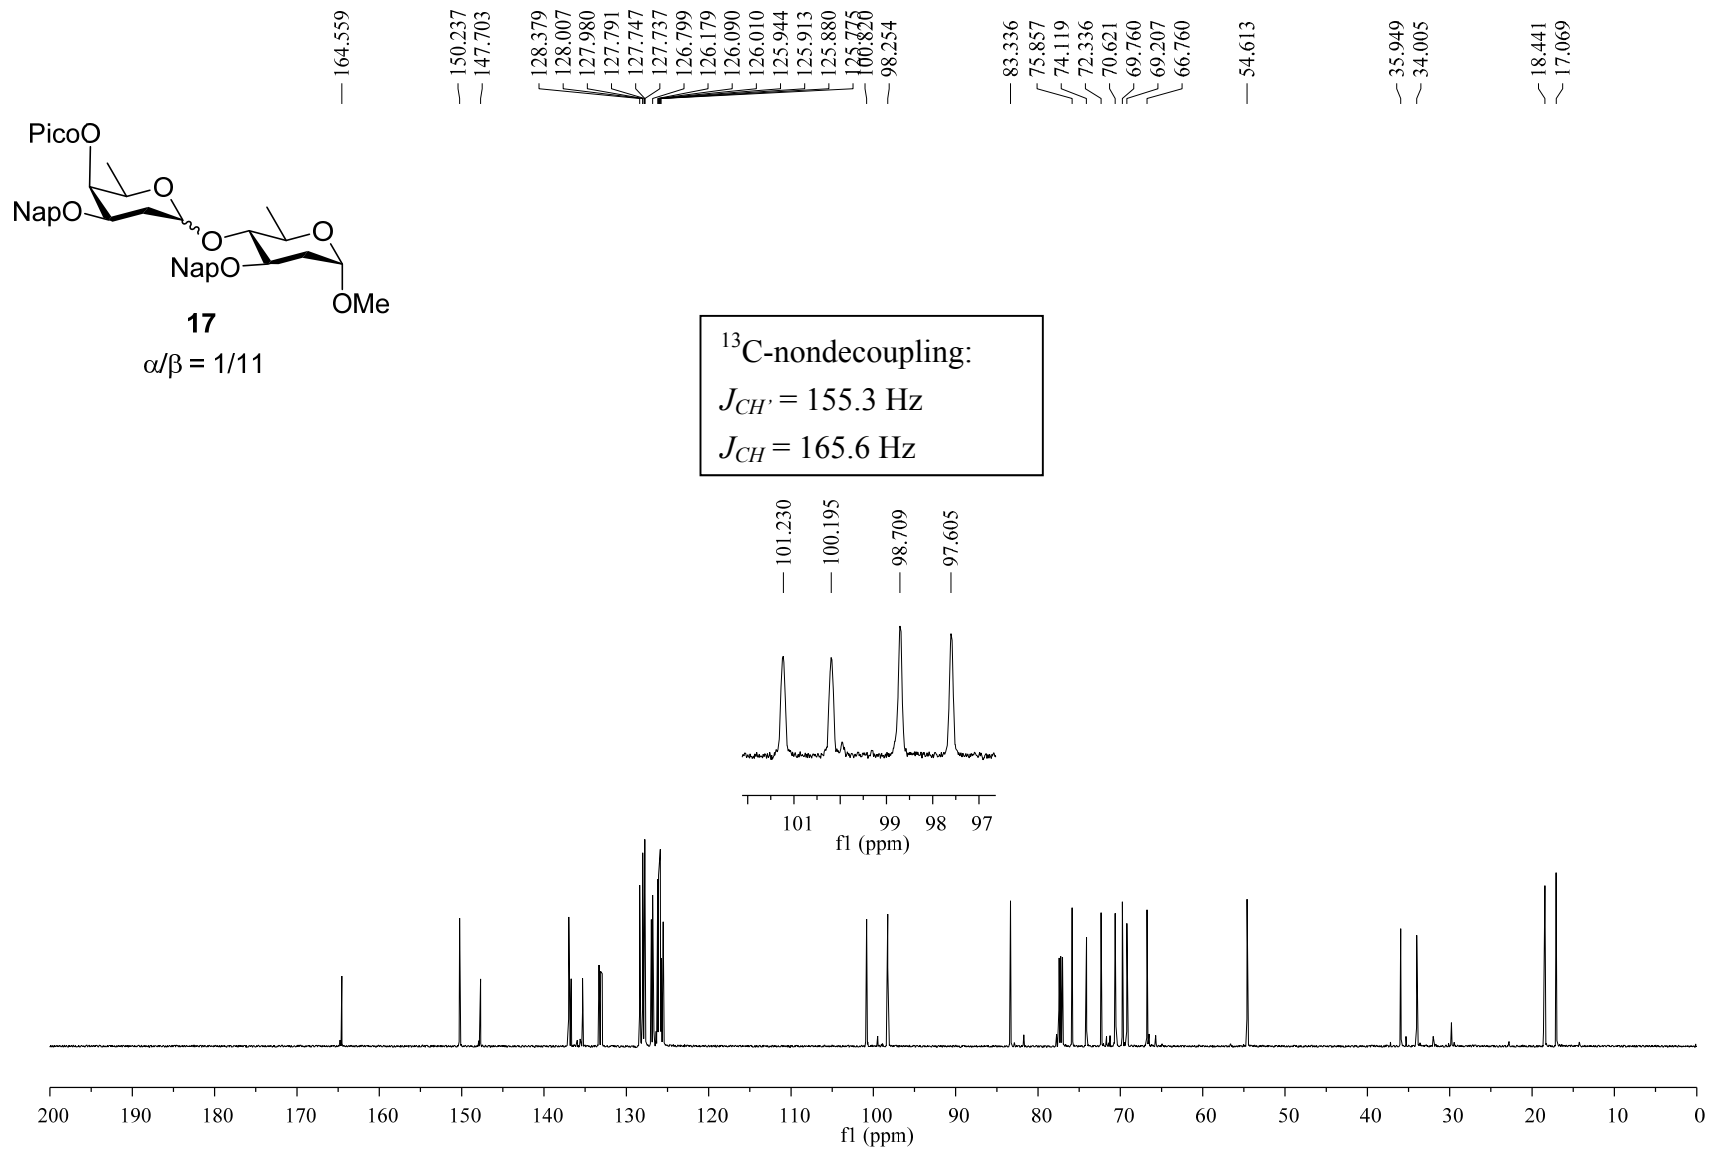

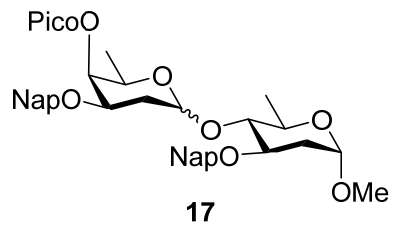

17

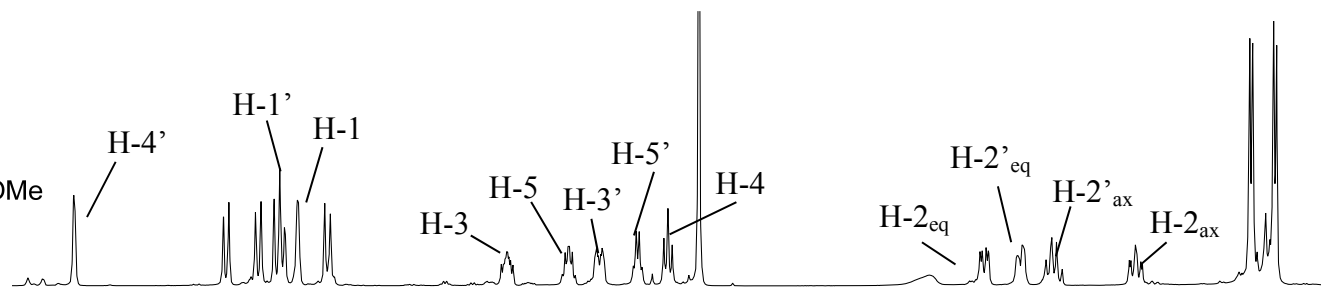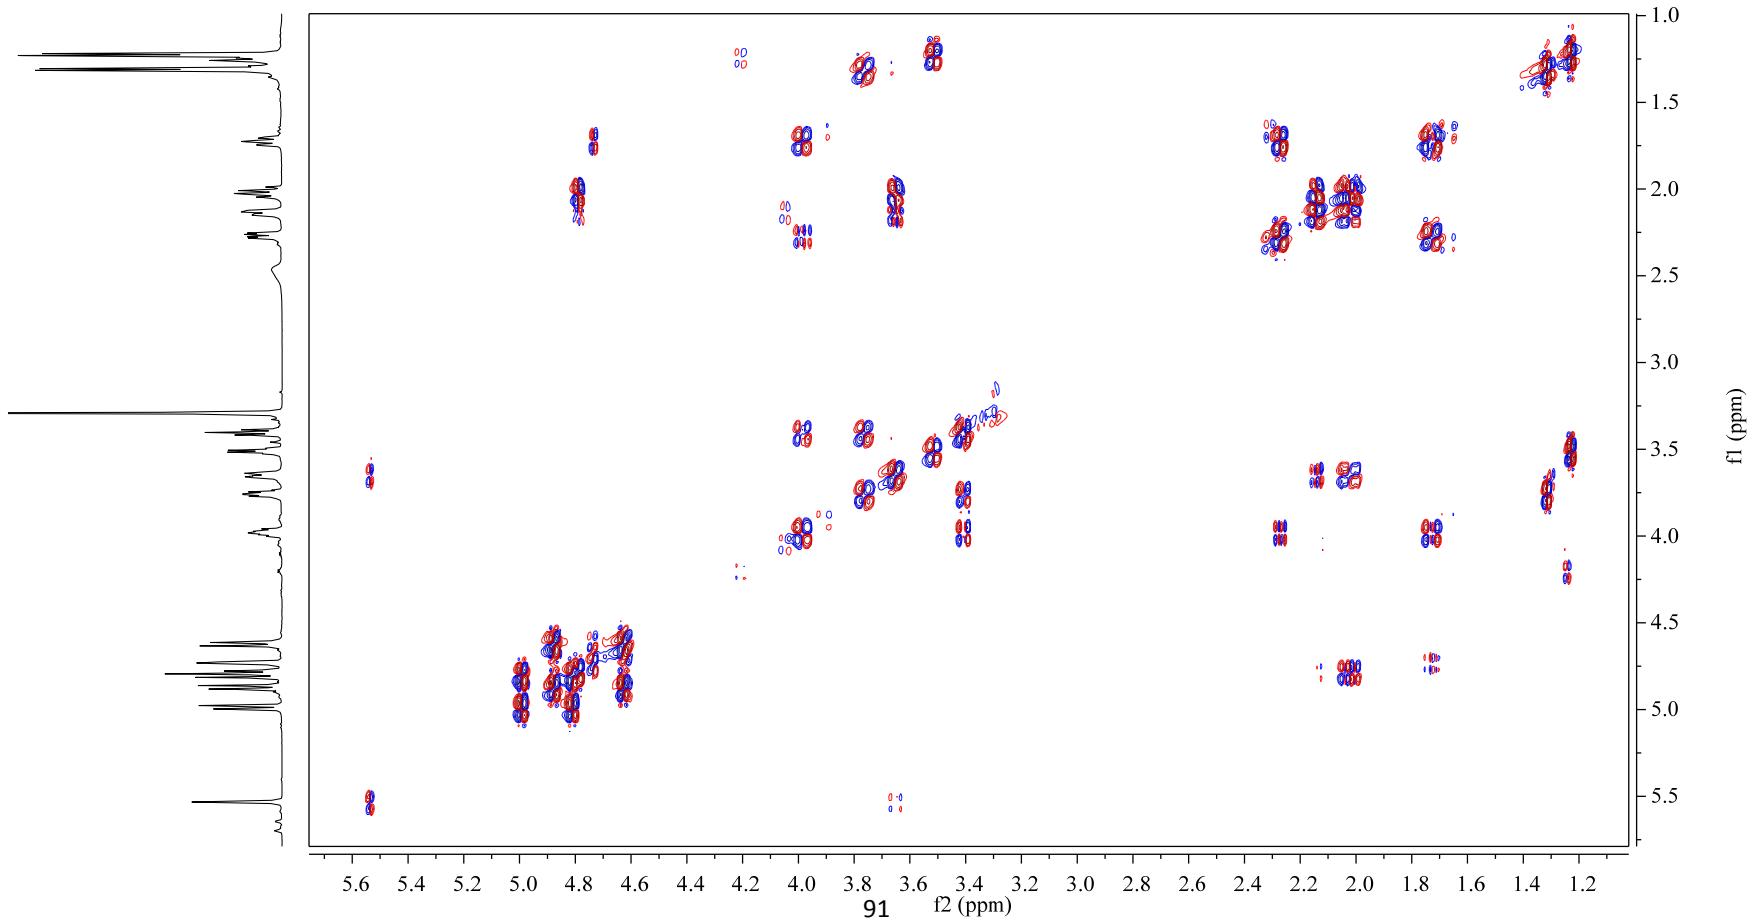

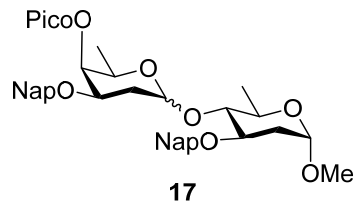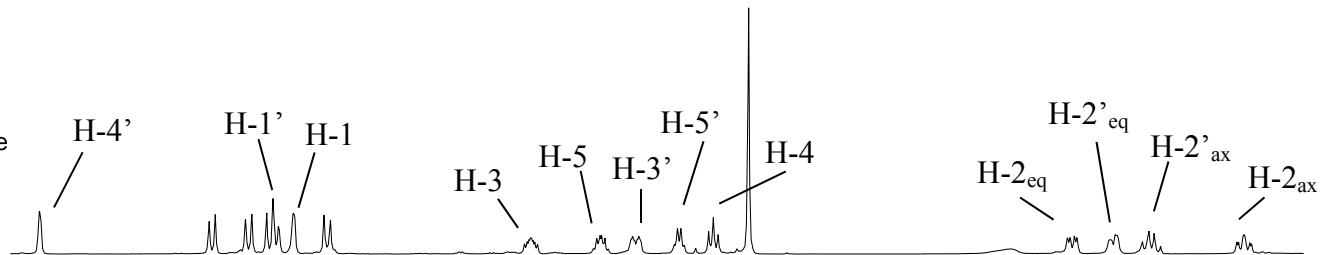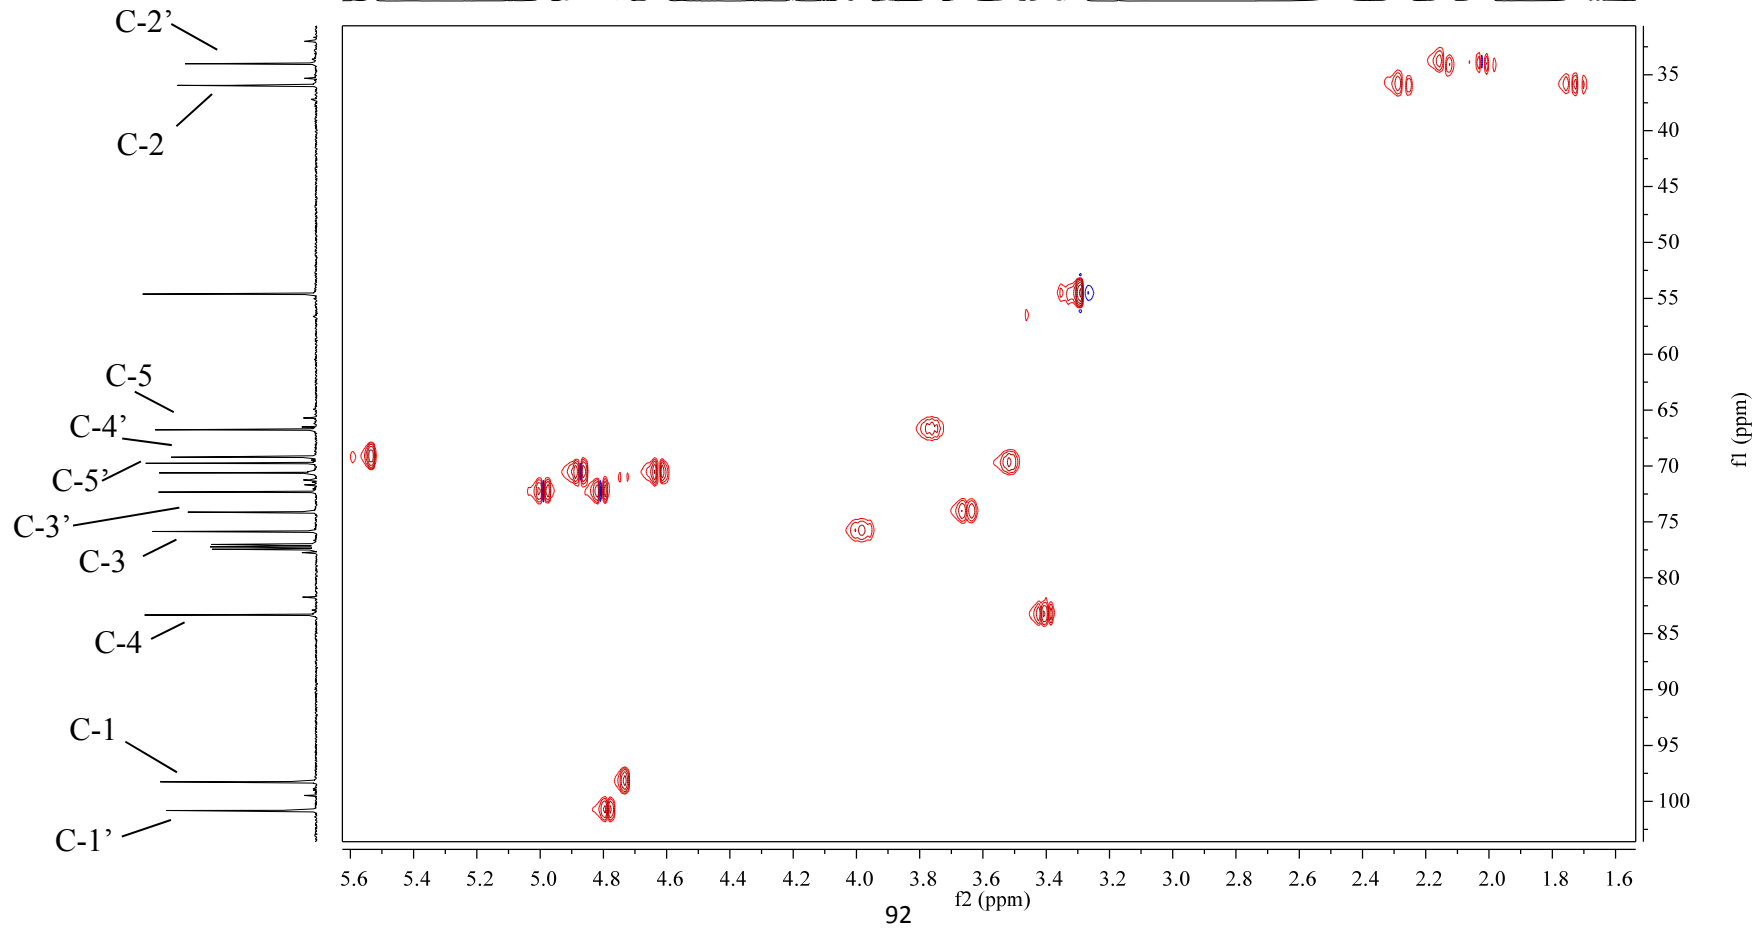

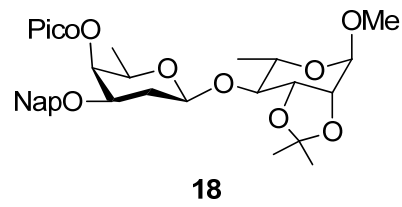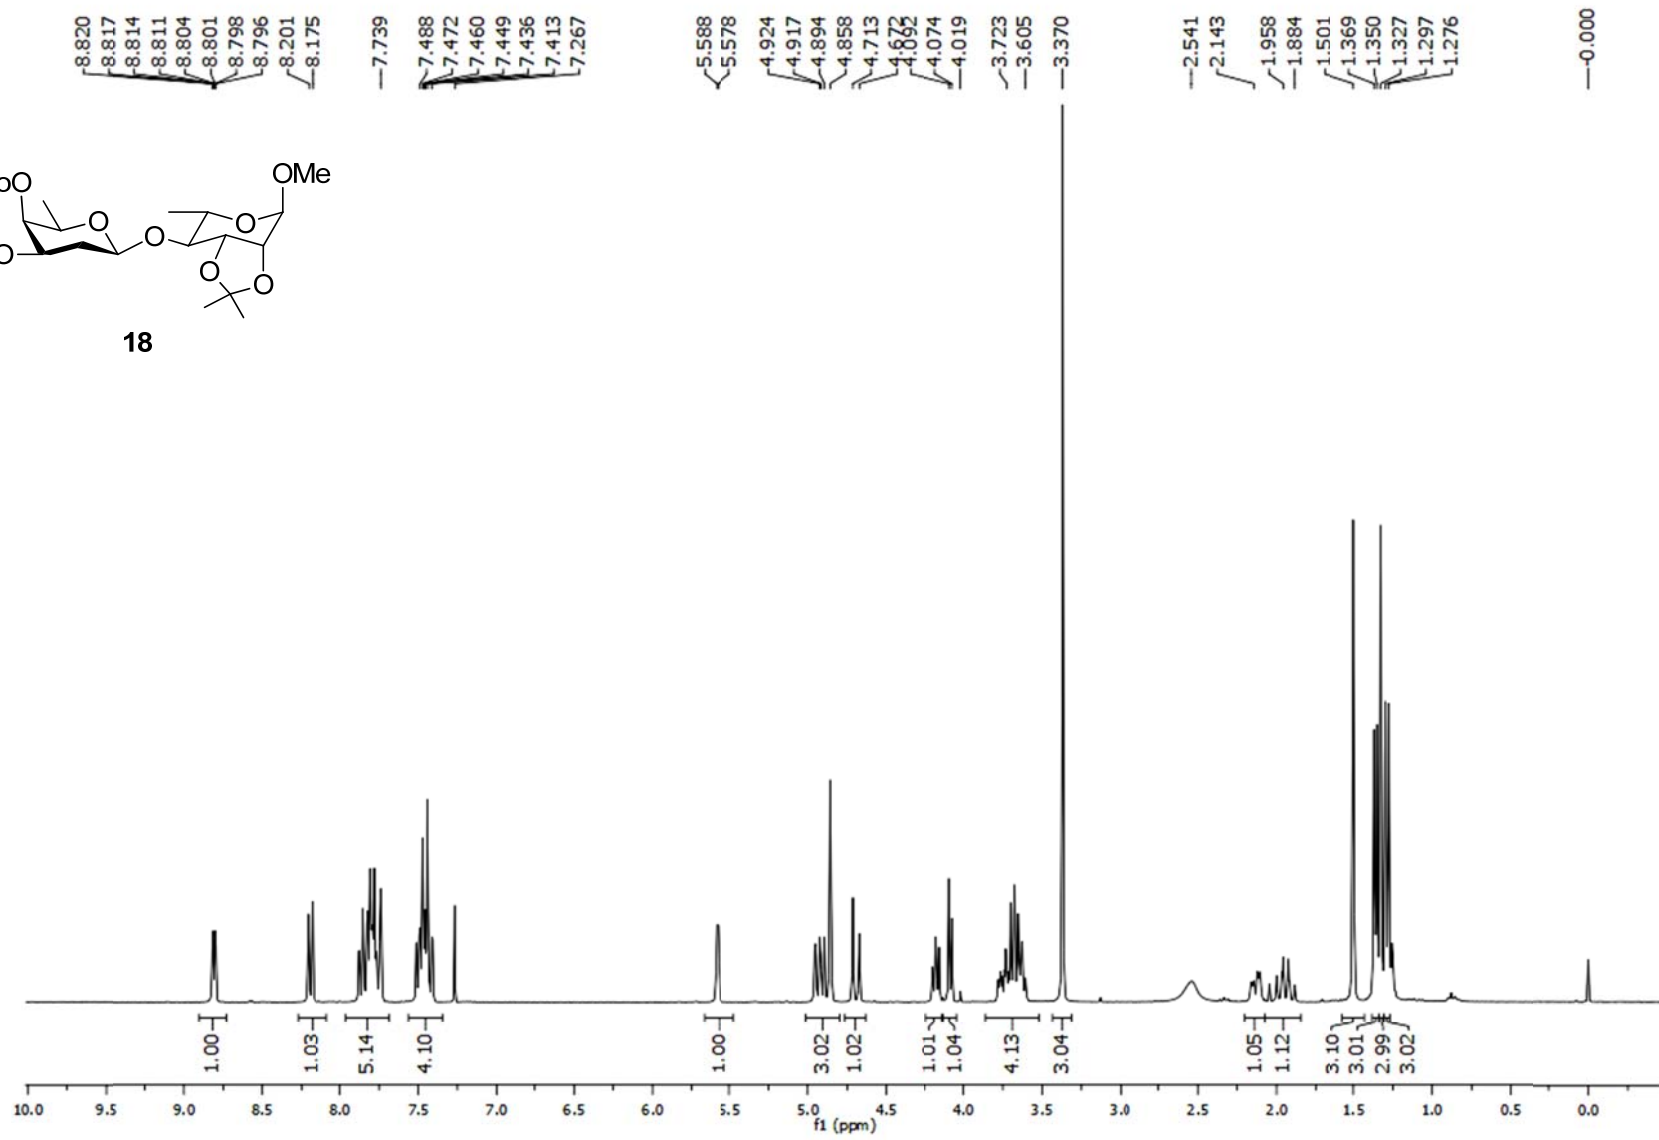

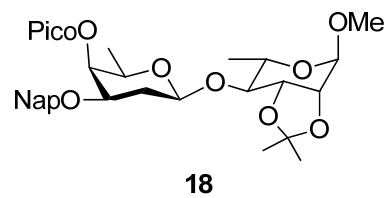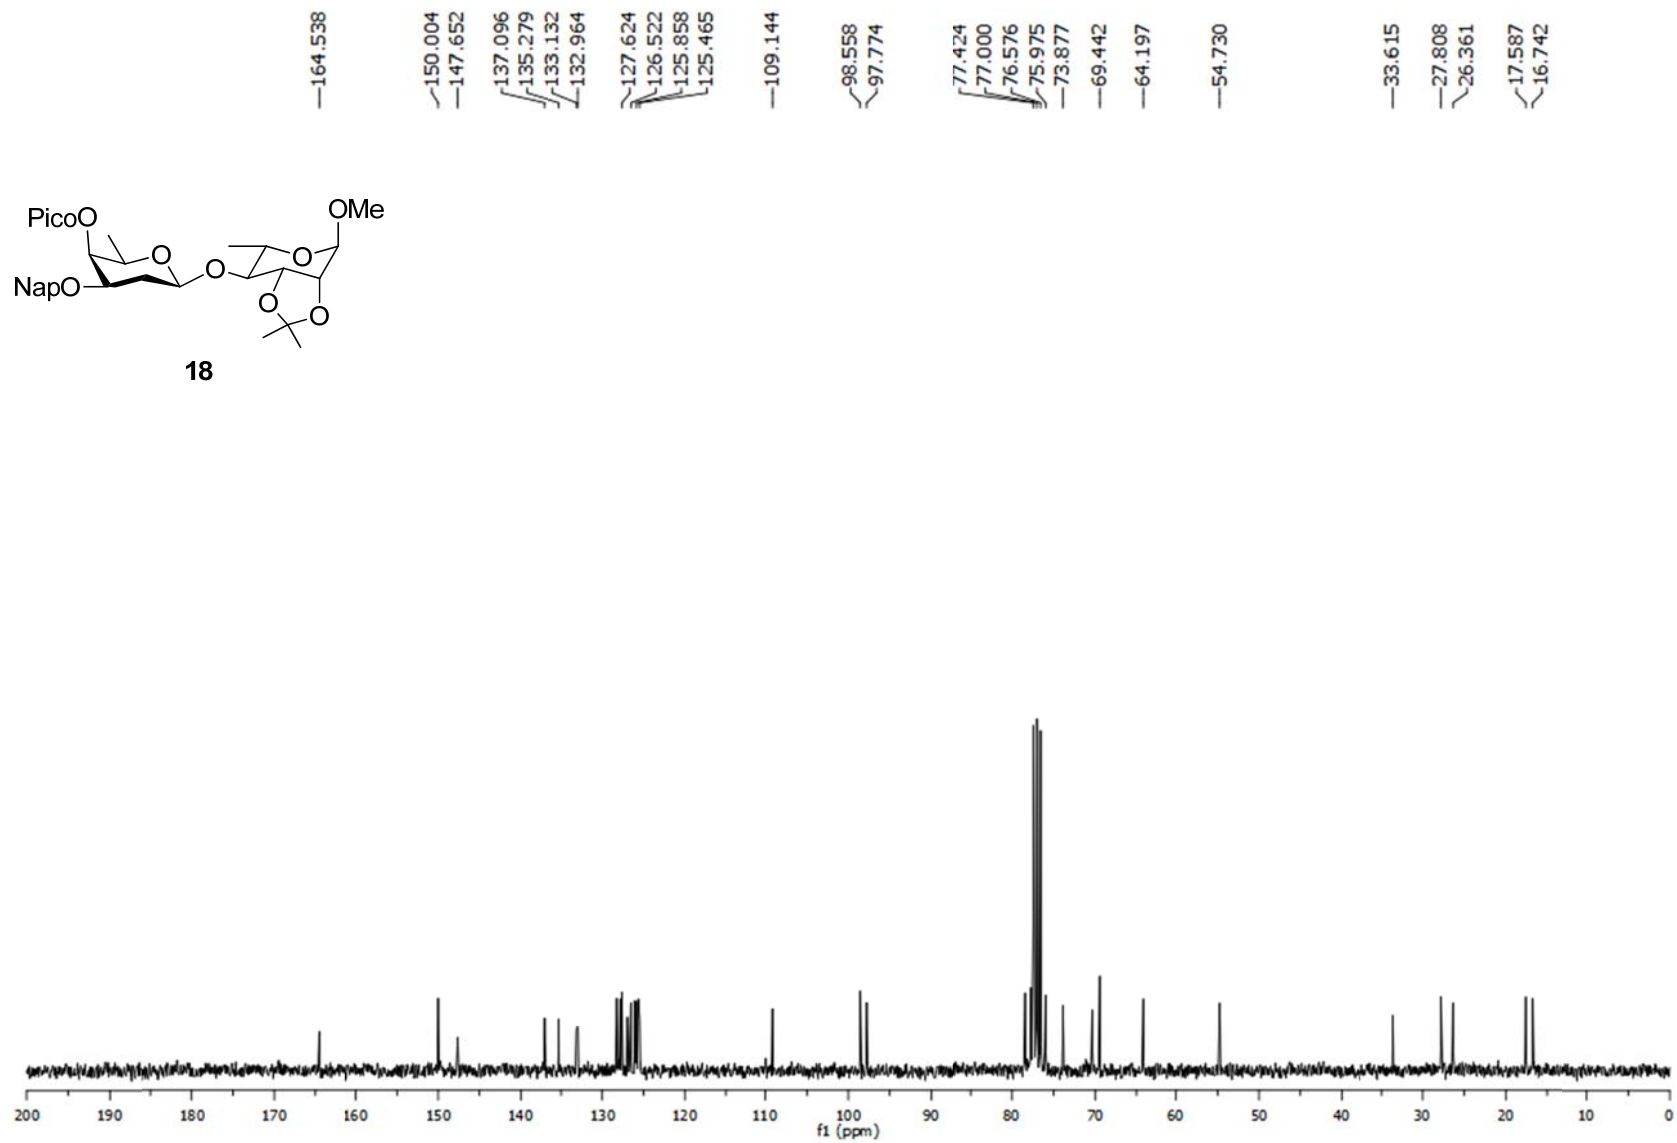

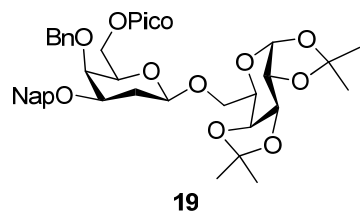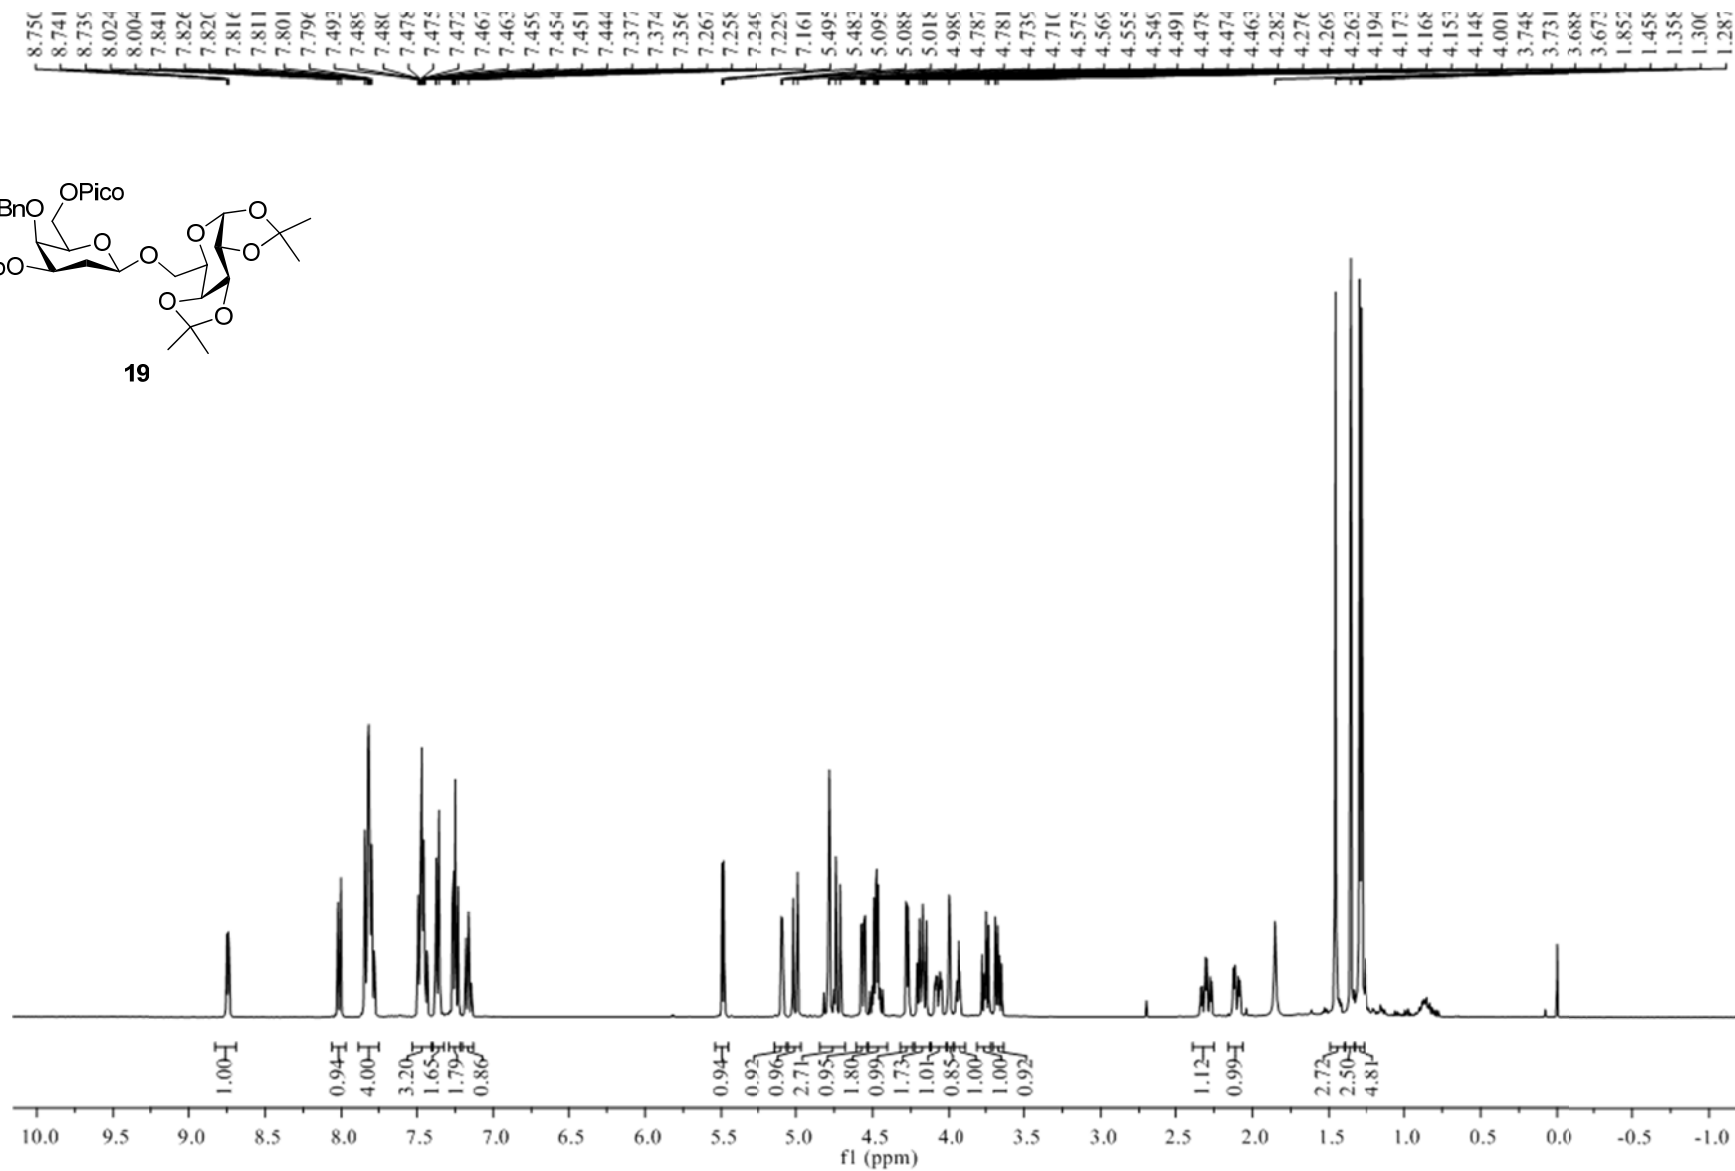

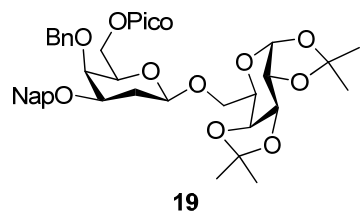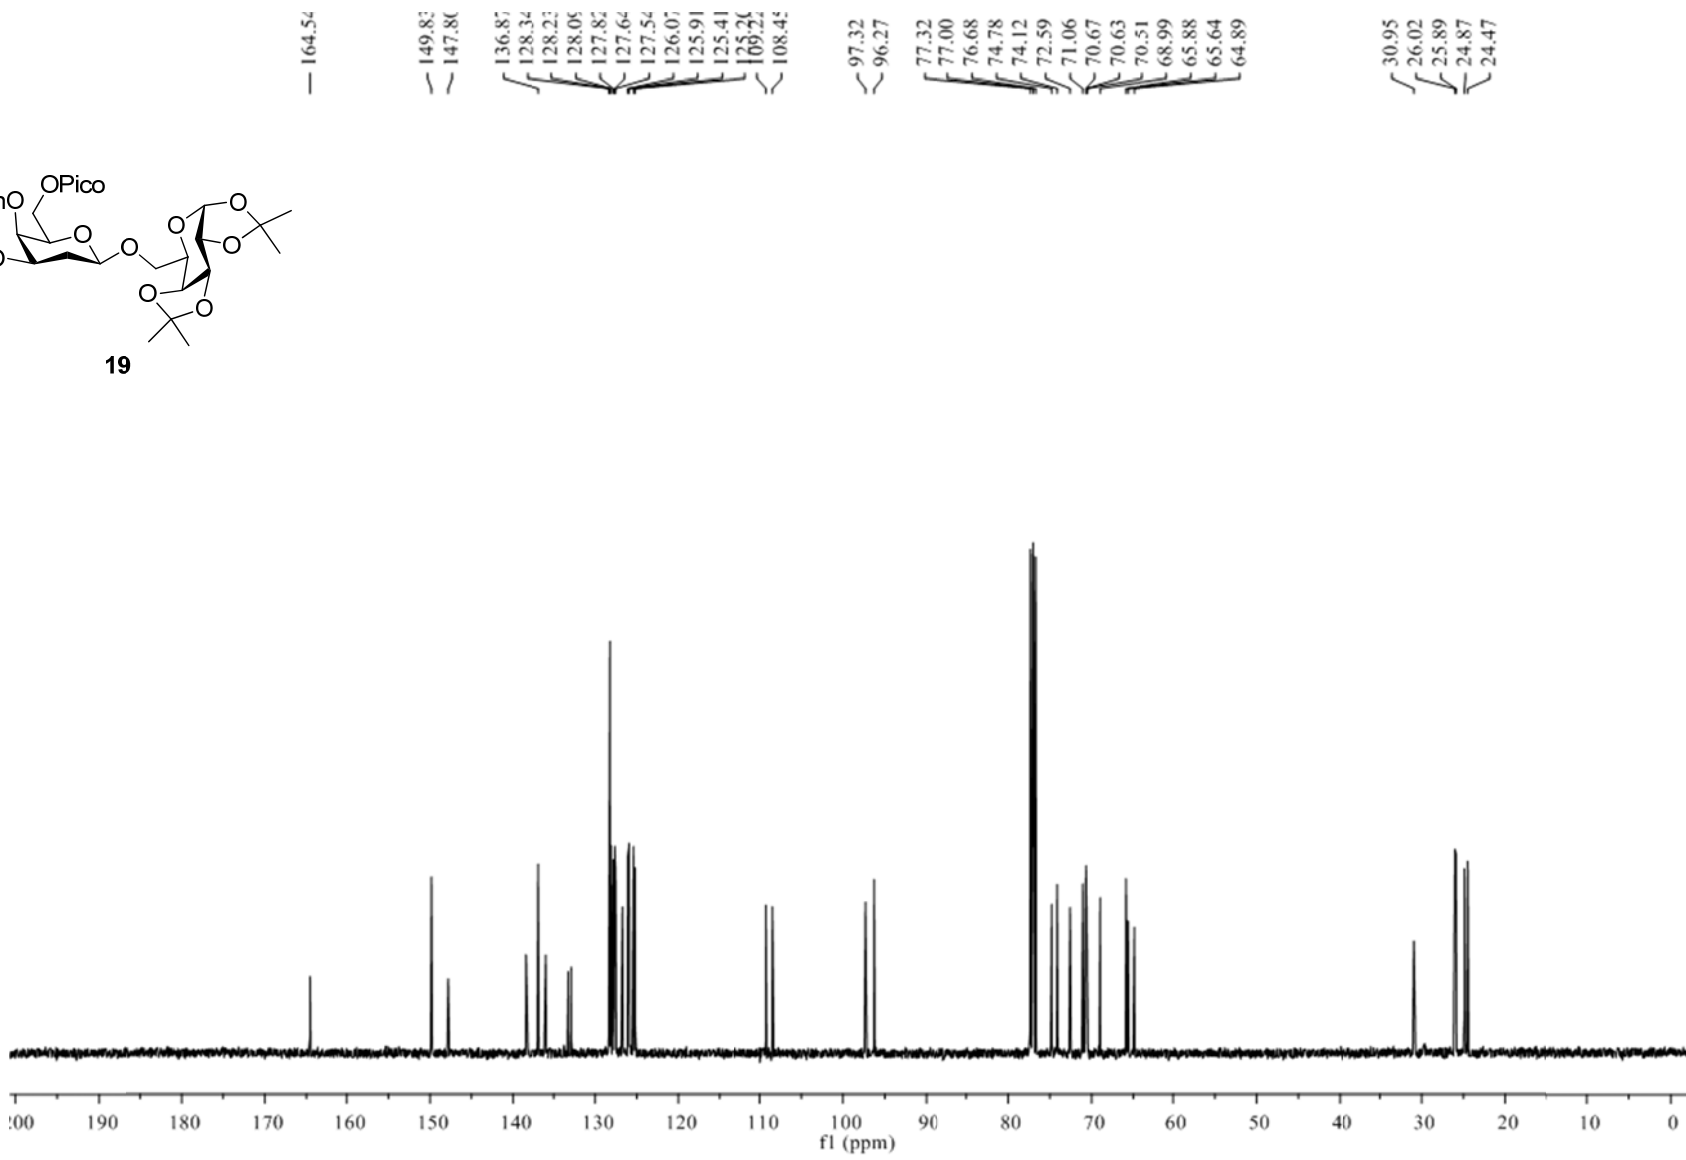



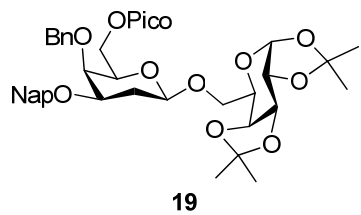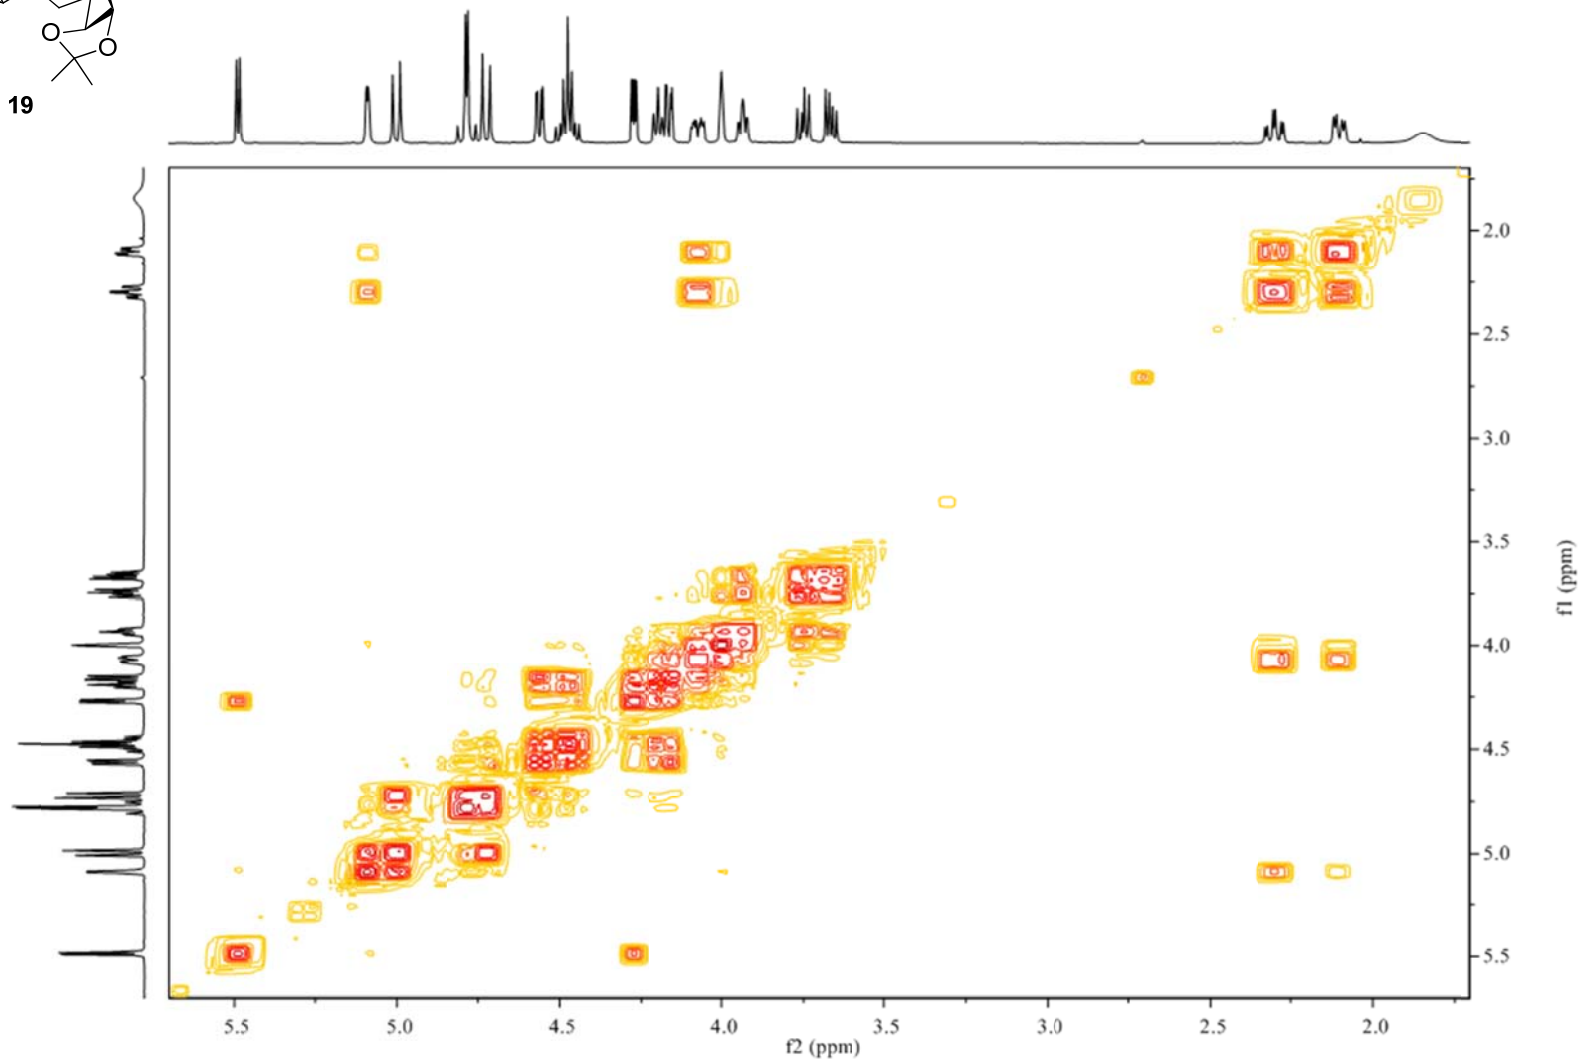

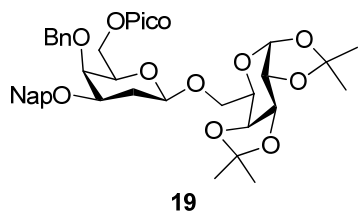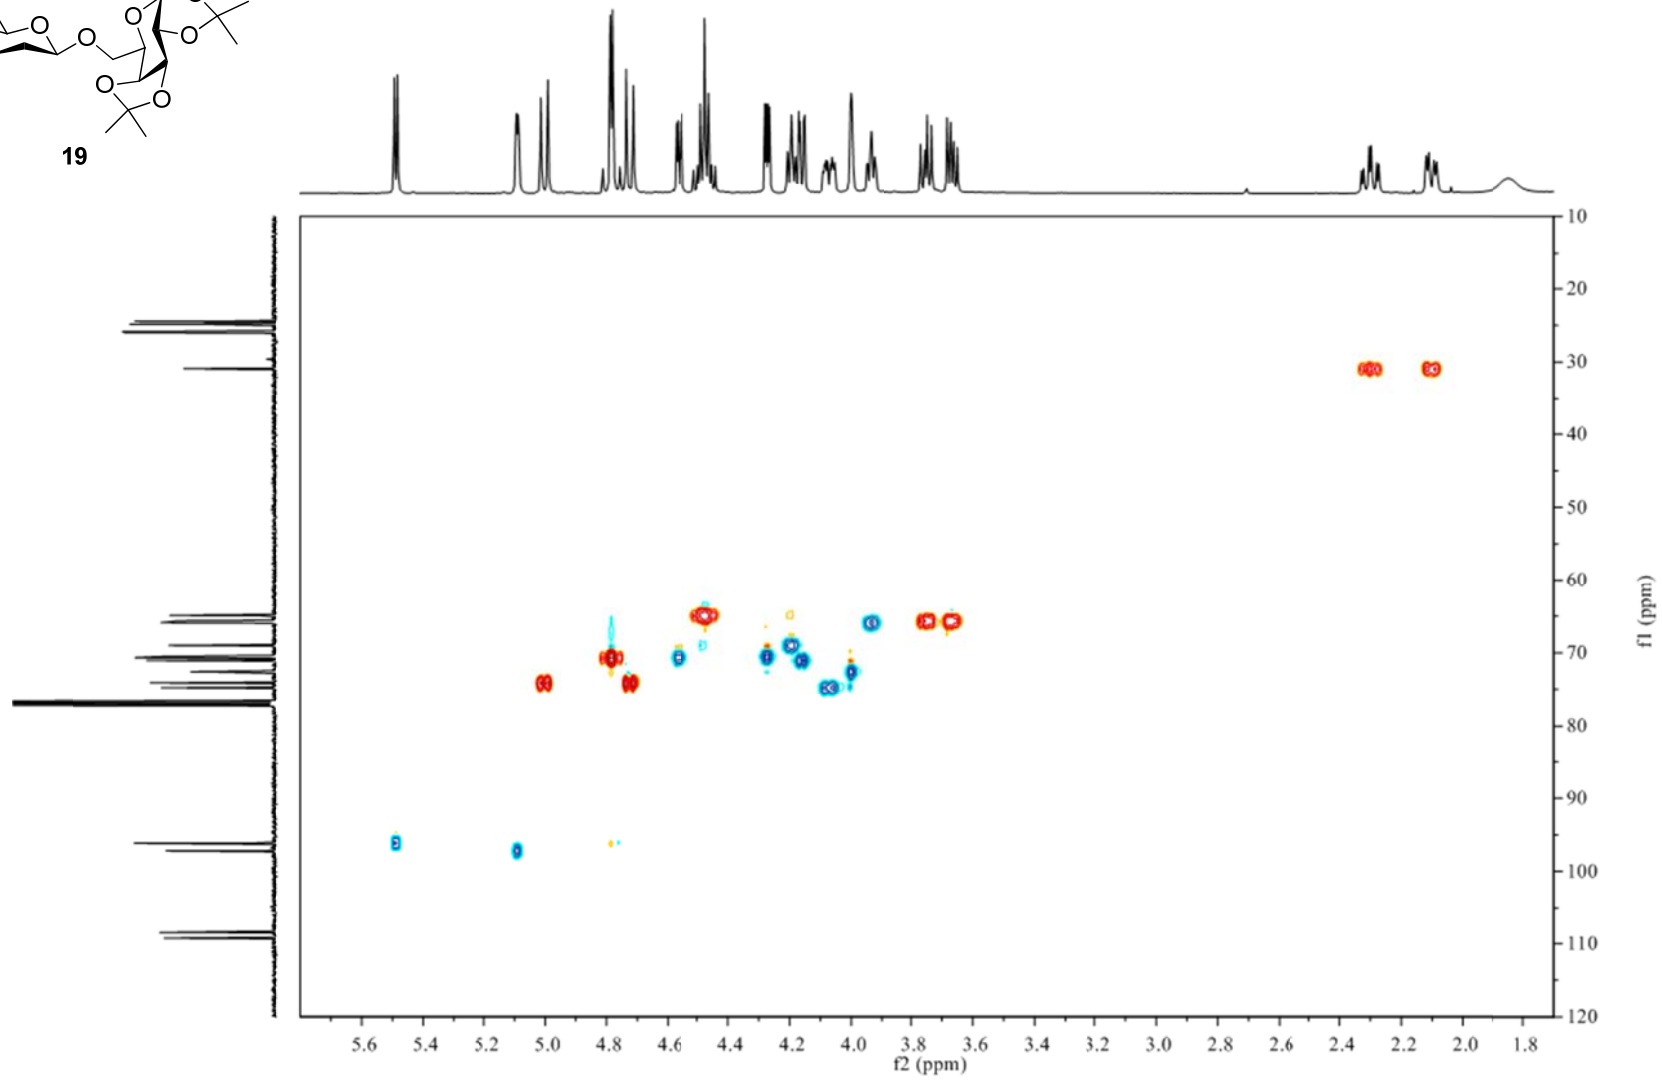

7.976  
7.975  
7.955  
7.933  
7.912  
7.843  
7.823  
7.817  
7.793  
7.476  
7.443  
7.408  
7.382  
7.290  
7.252  
7.211  
7.174

5.544  
5.531  
5.501  
5.489  
5.102  
5.024  
4.995  
4.753  
4.578  
4.499  
4.443  
4.343  
4.290  
4.183  
4.142  
4.087  
4.055  
3.972  
3.786  
3.698  
3.625  
2.268  
2.214  
2.173  
2.137  
2.126  
2.105  
2.094  
2.035  
1.688  
1.373  
1.304  
1.262  
1.190  
0.882

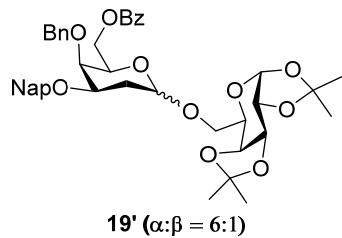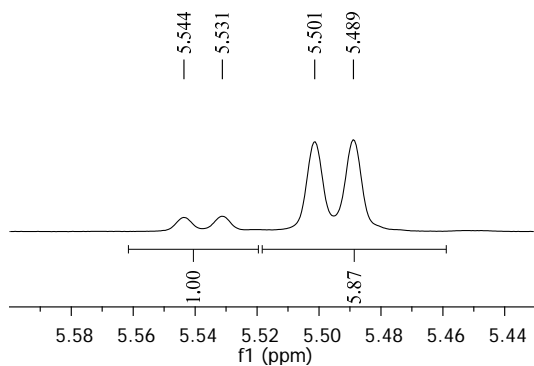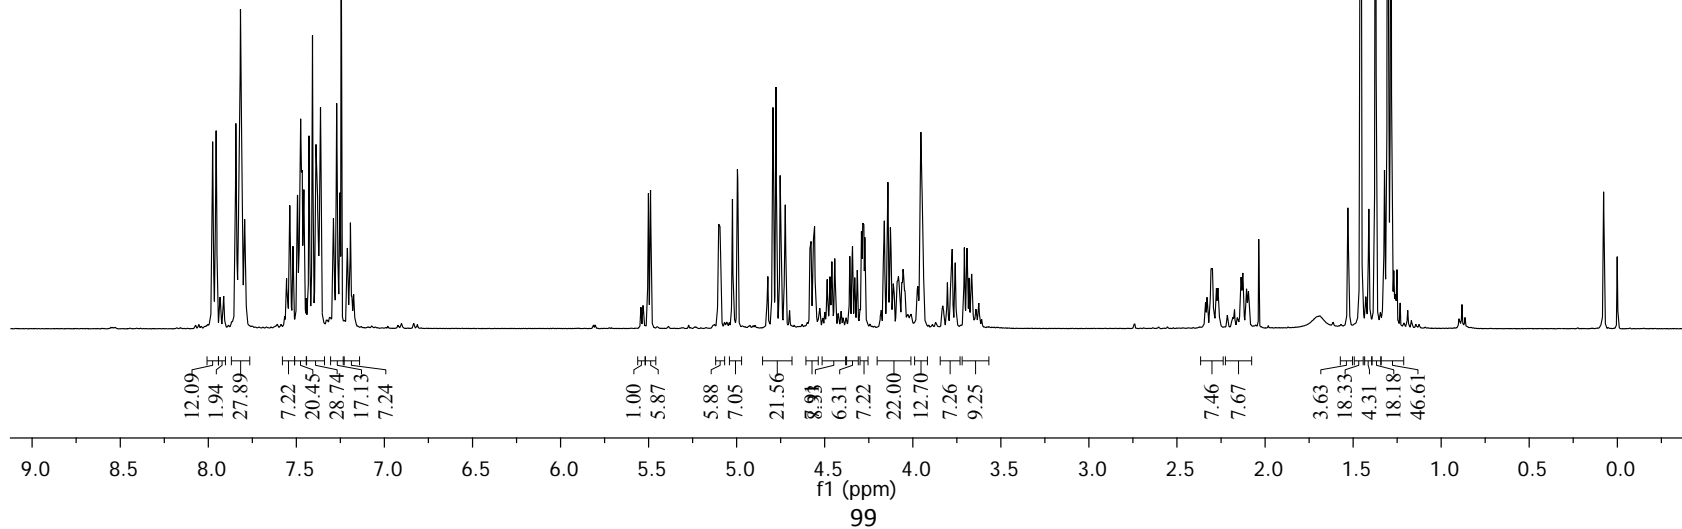

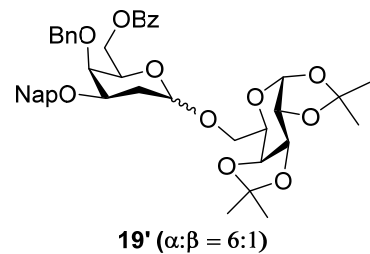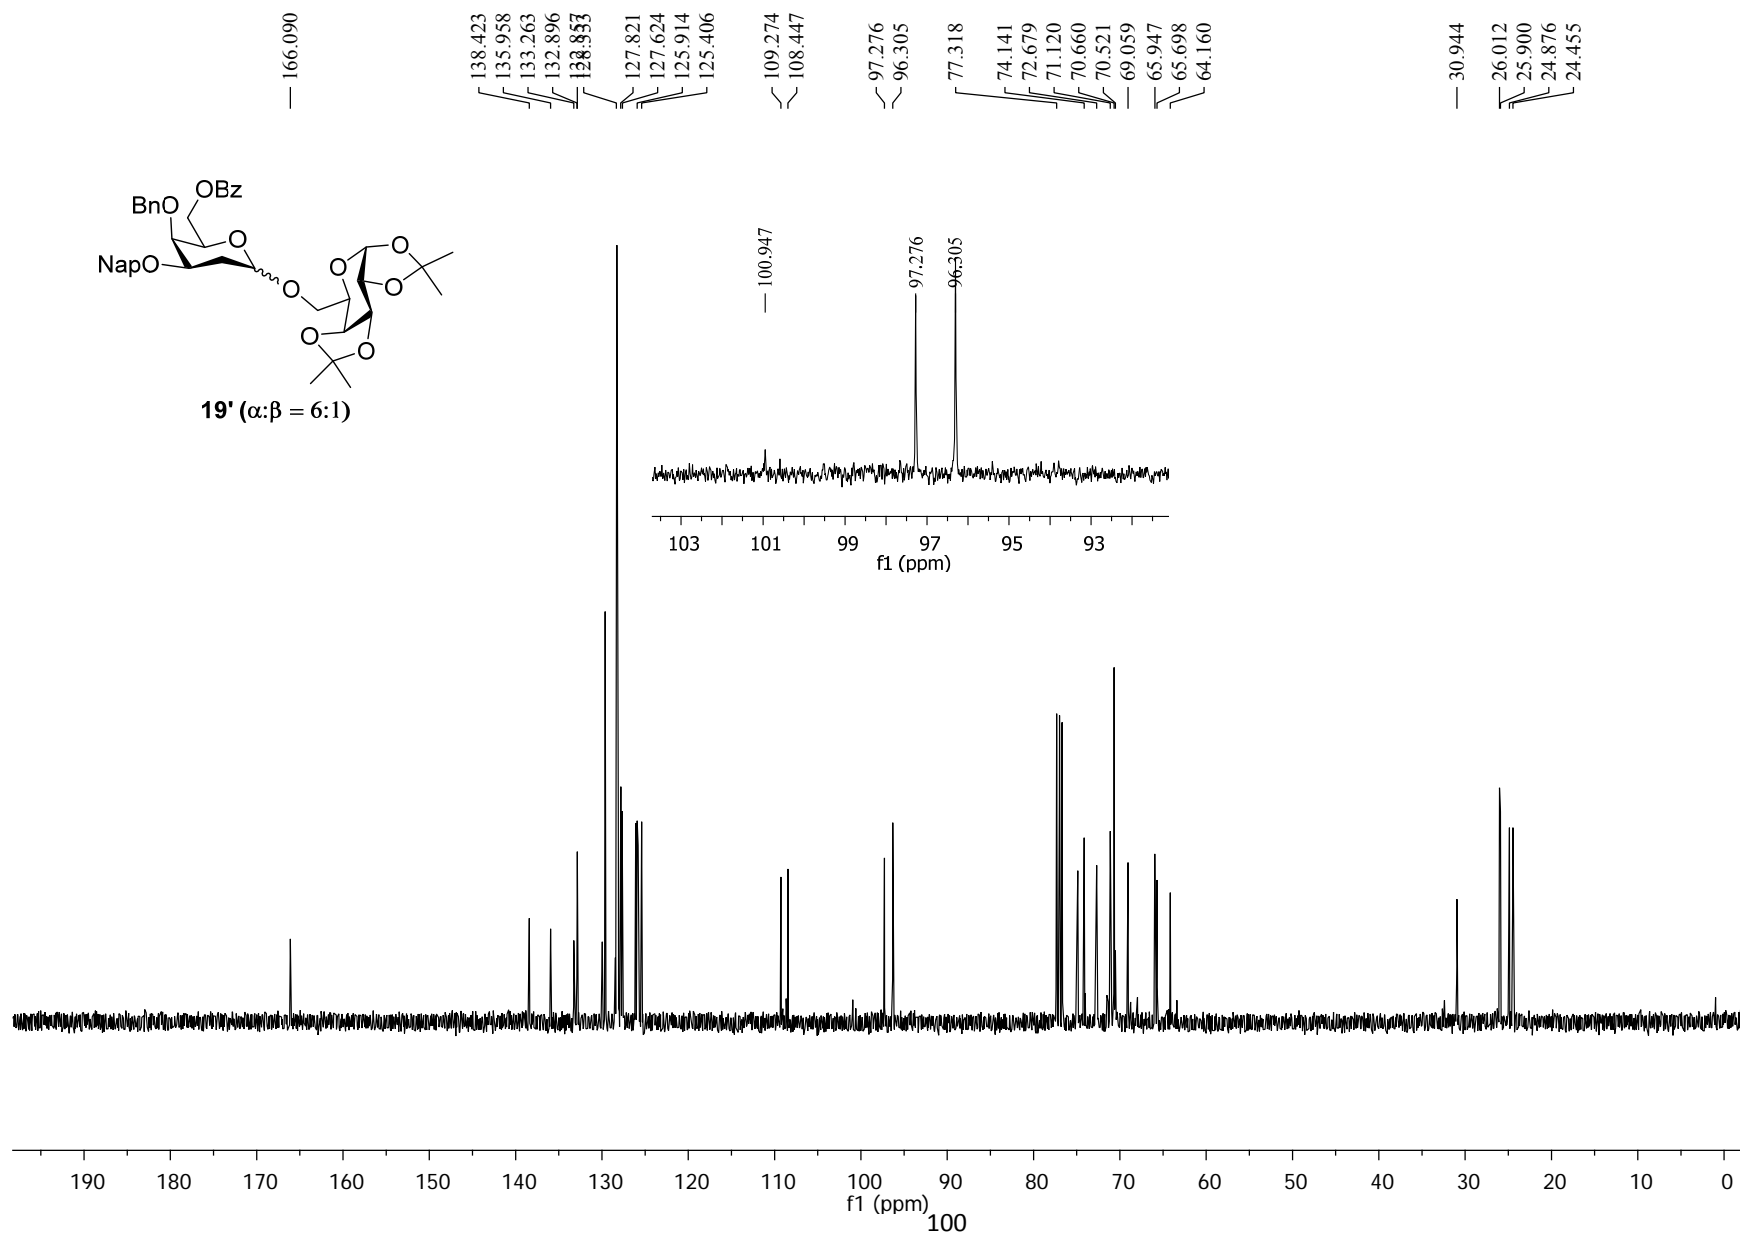

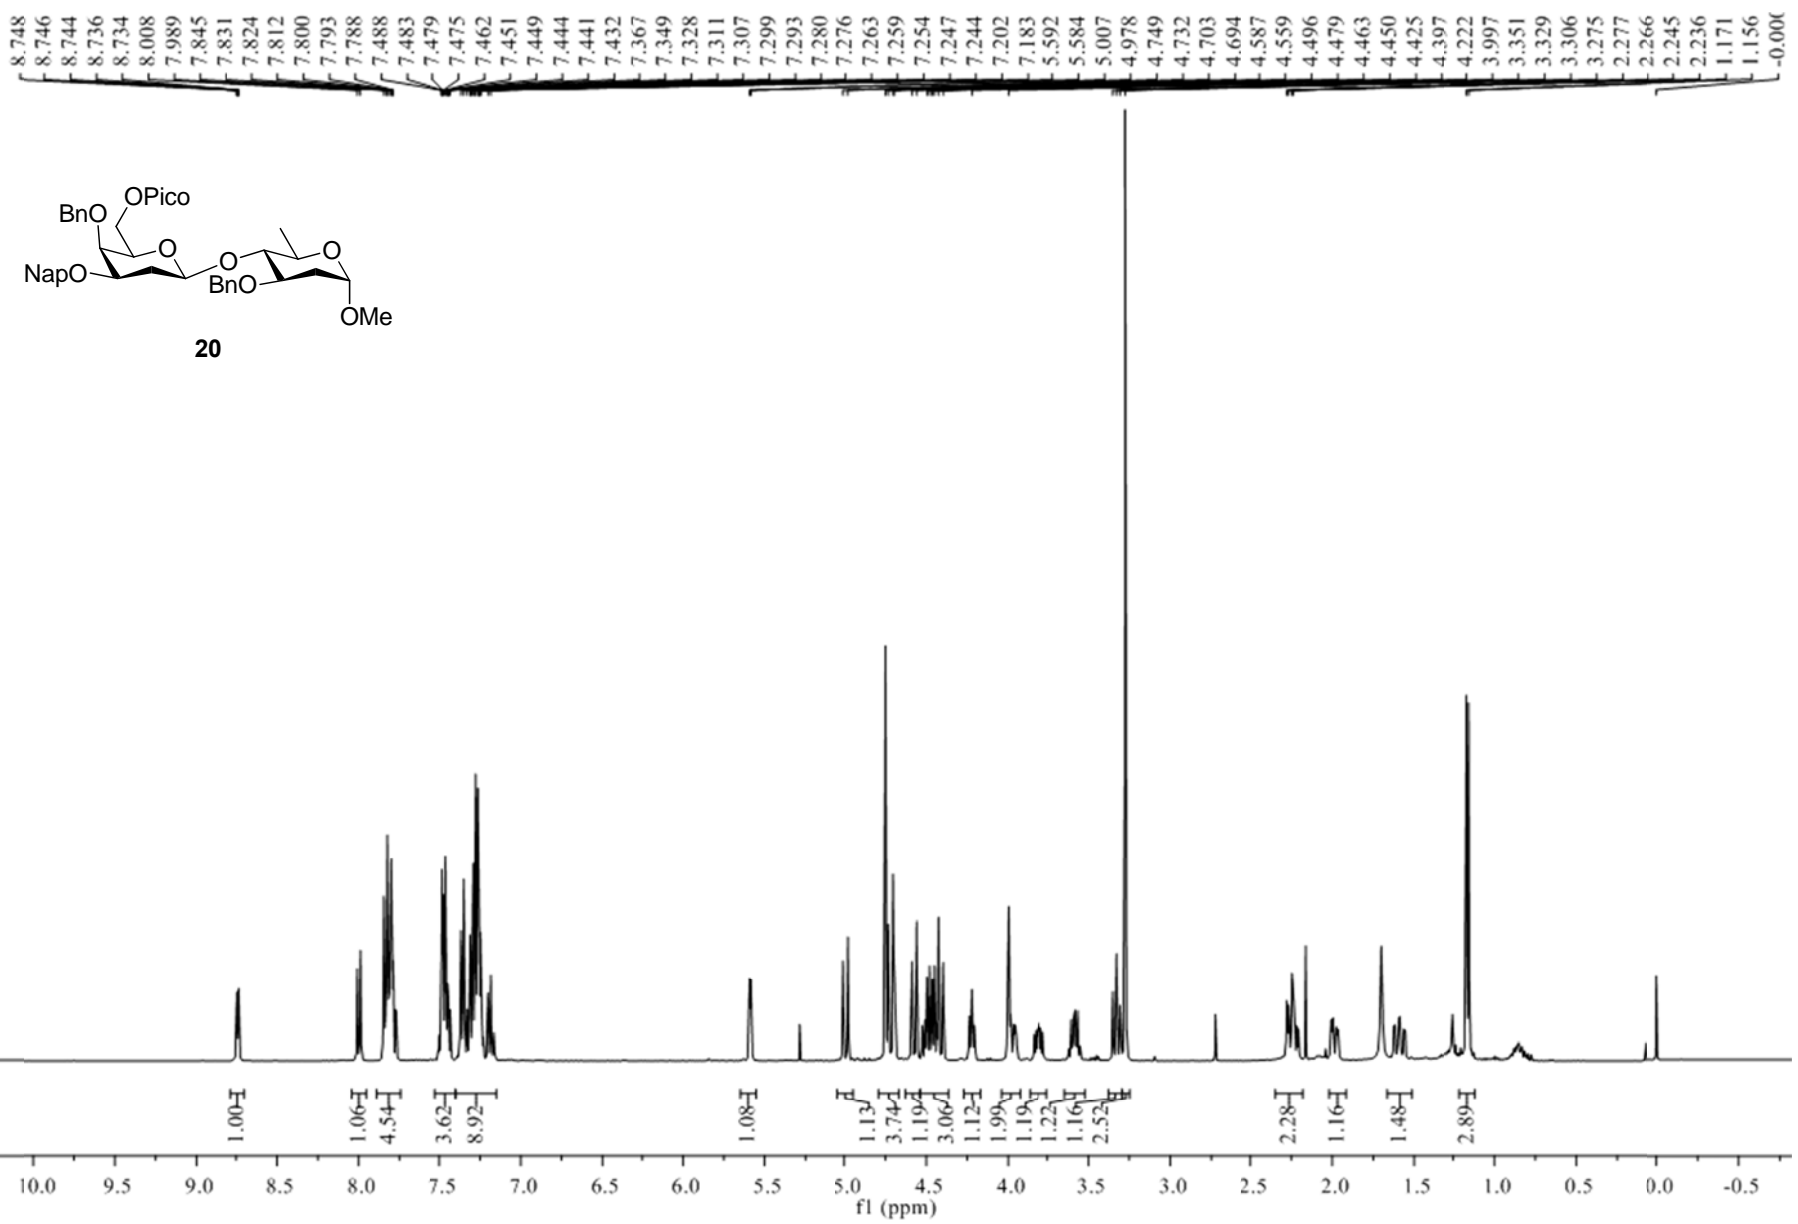

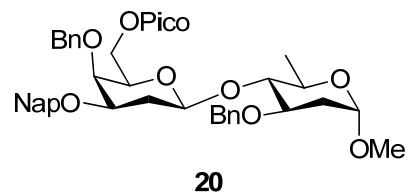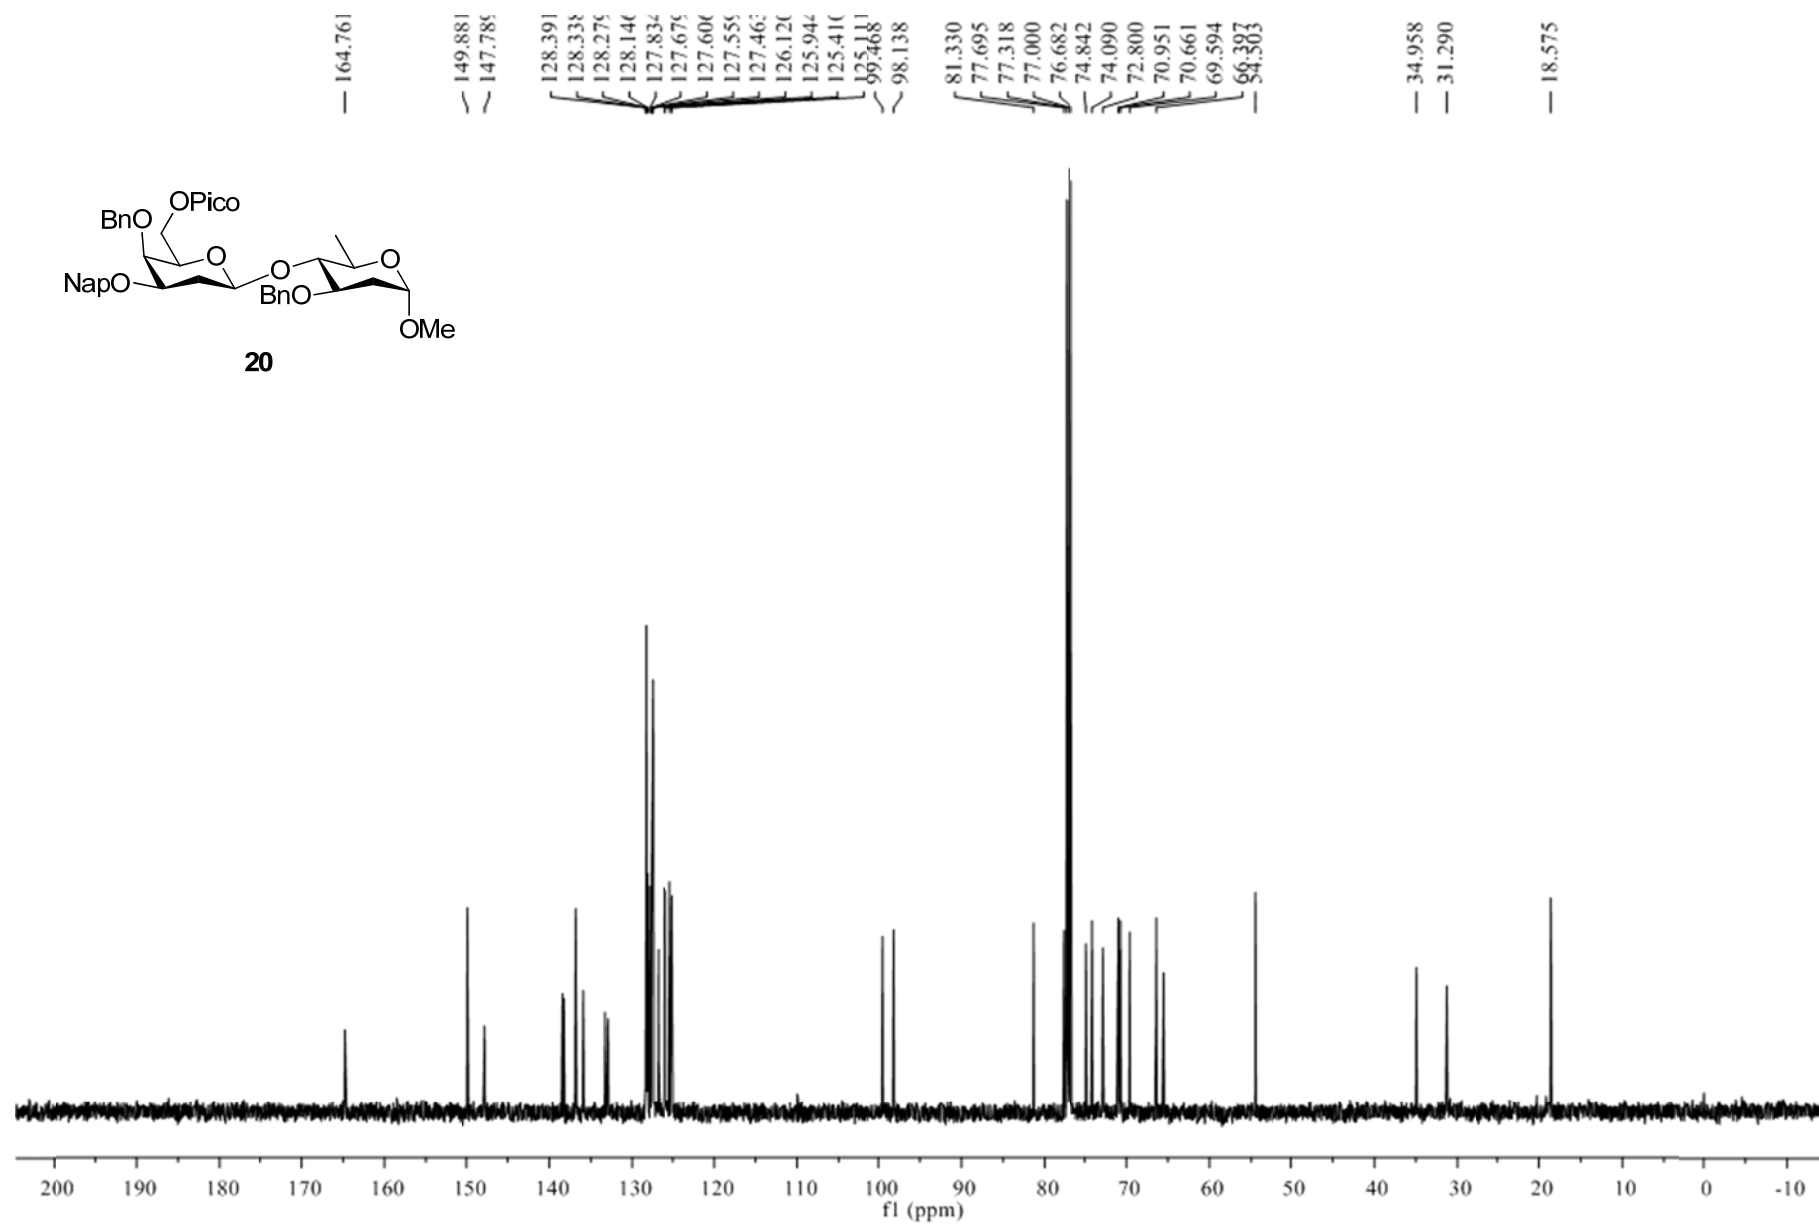

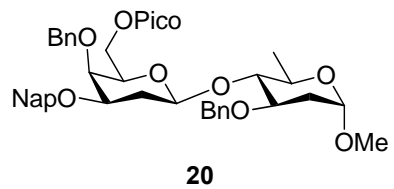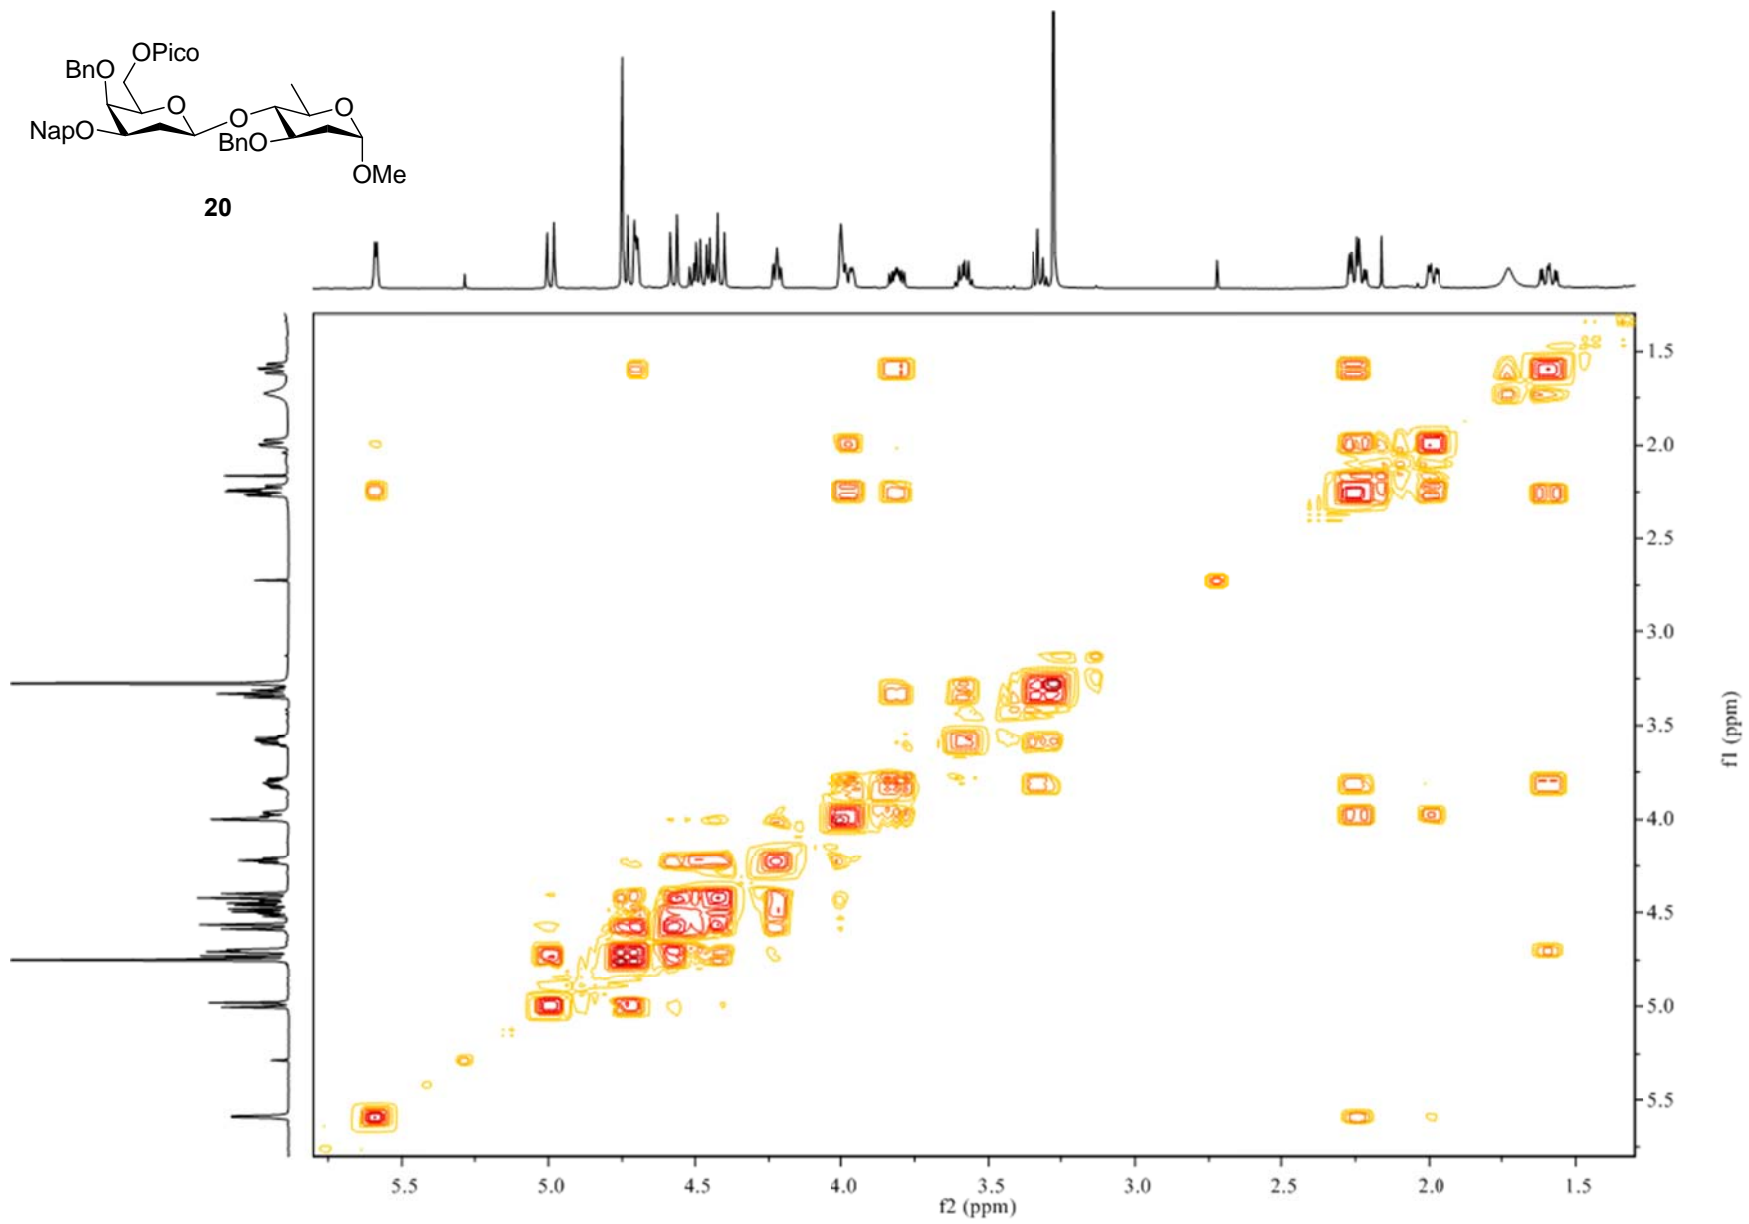

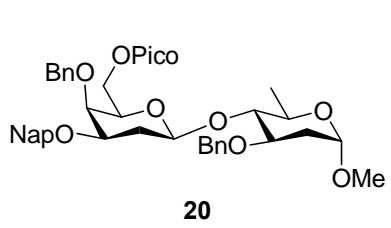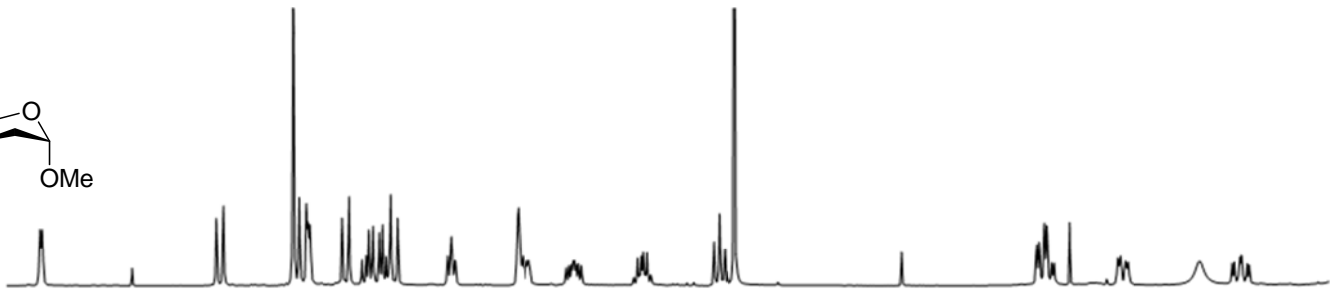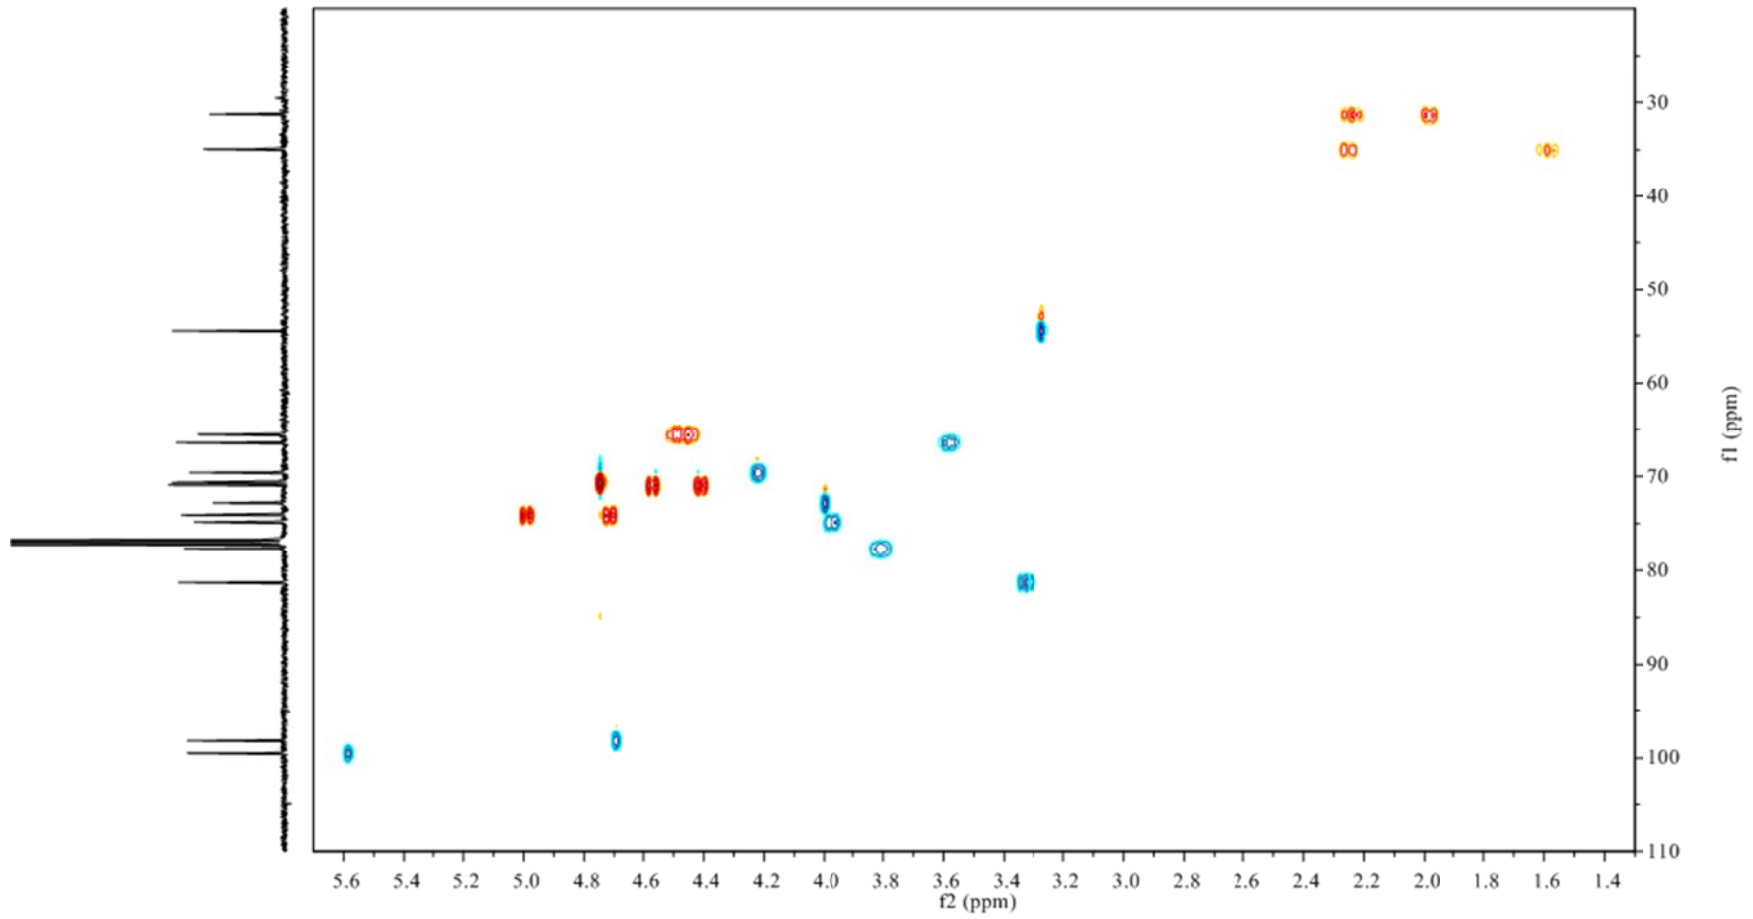



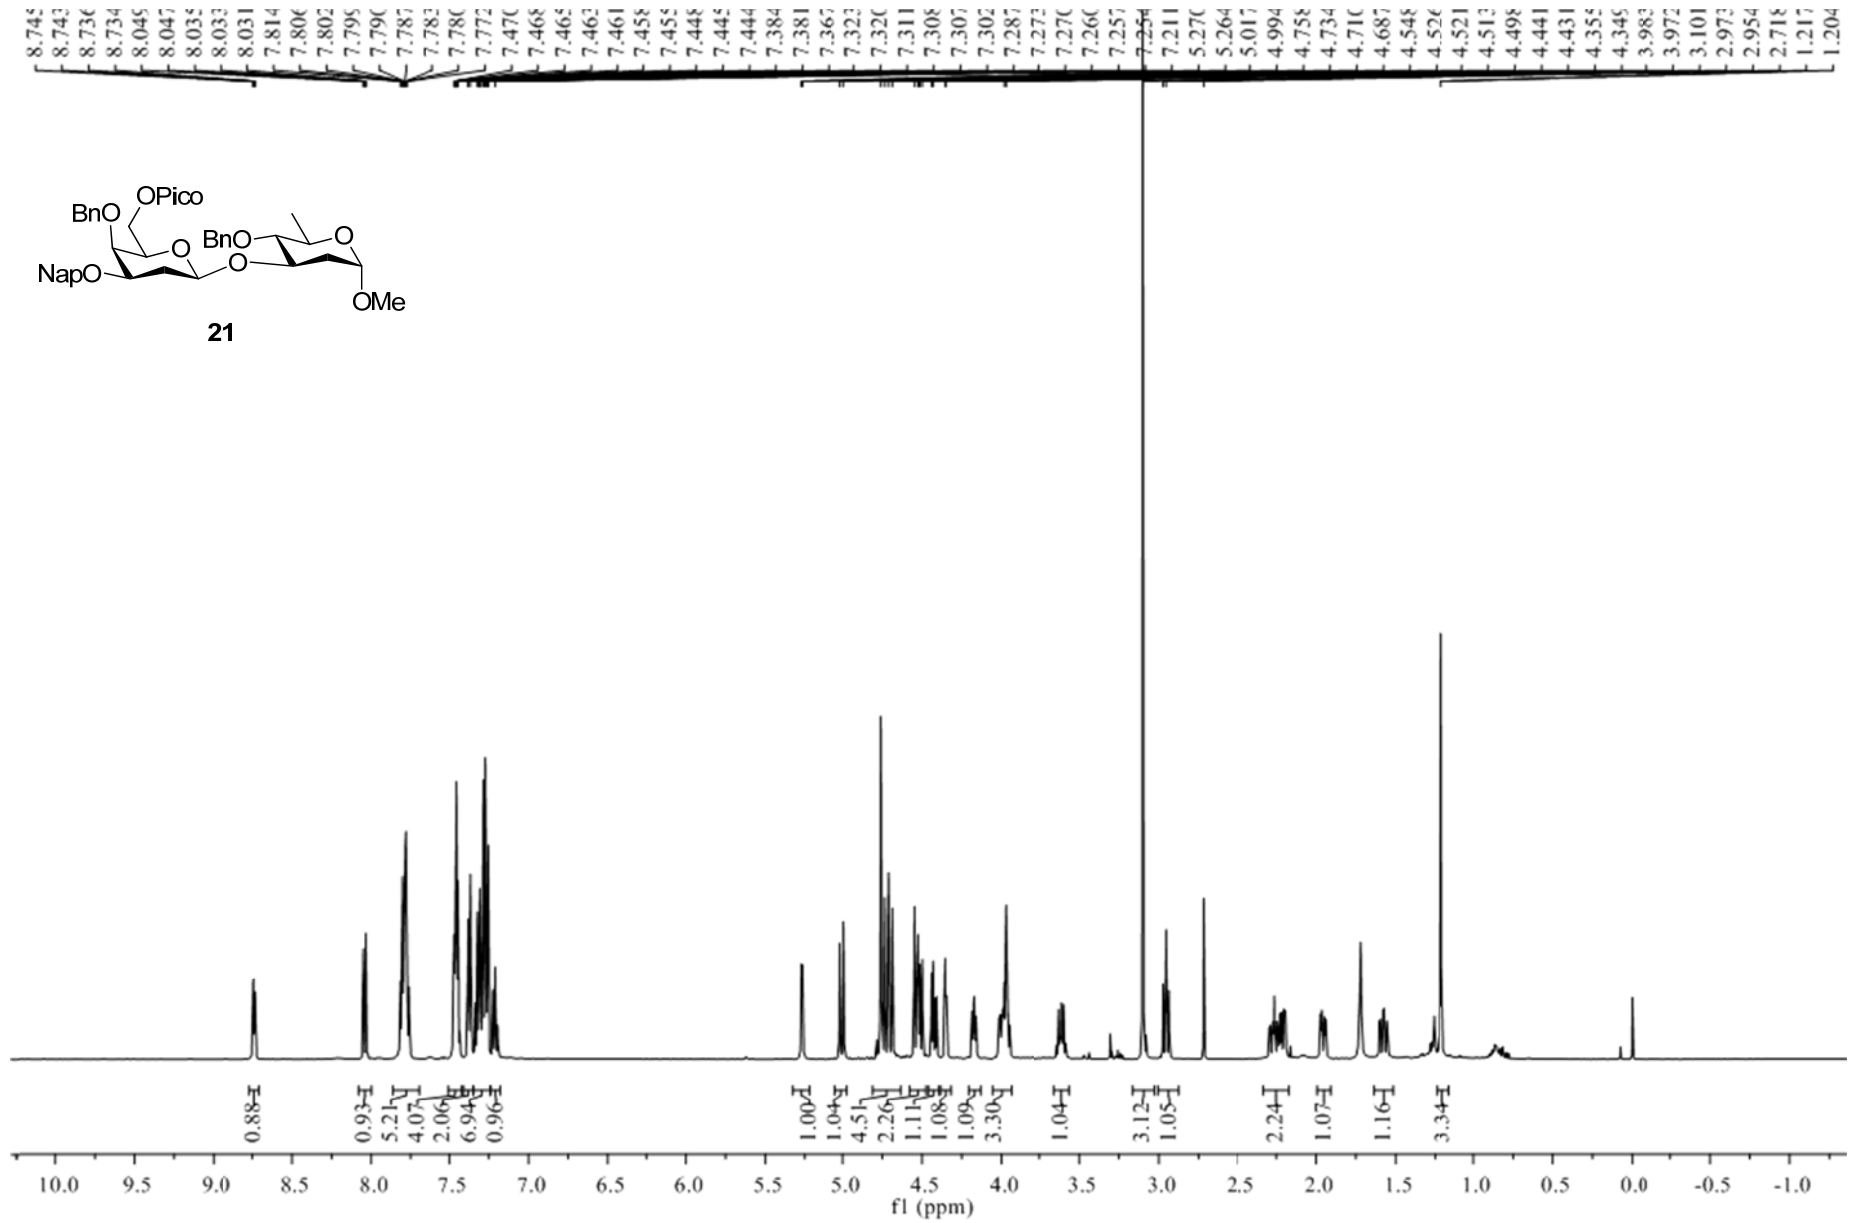

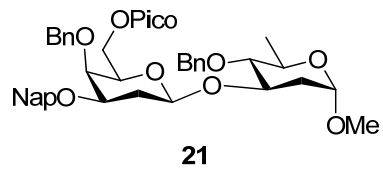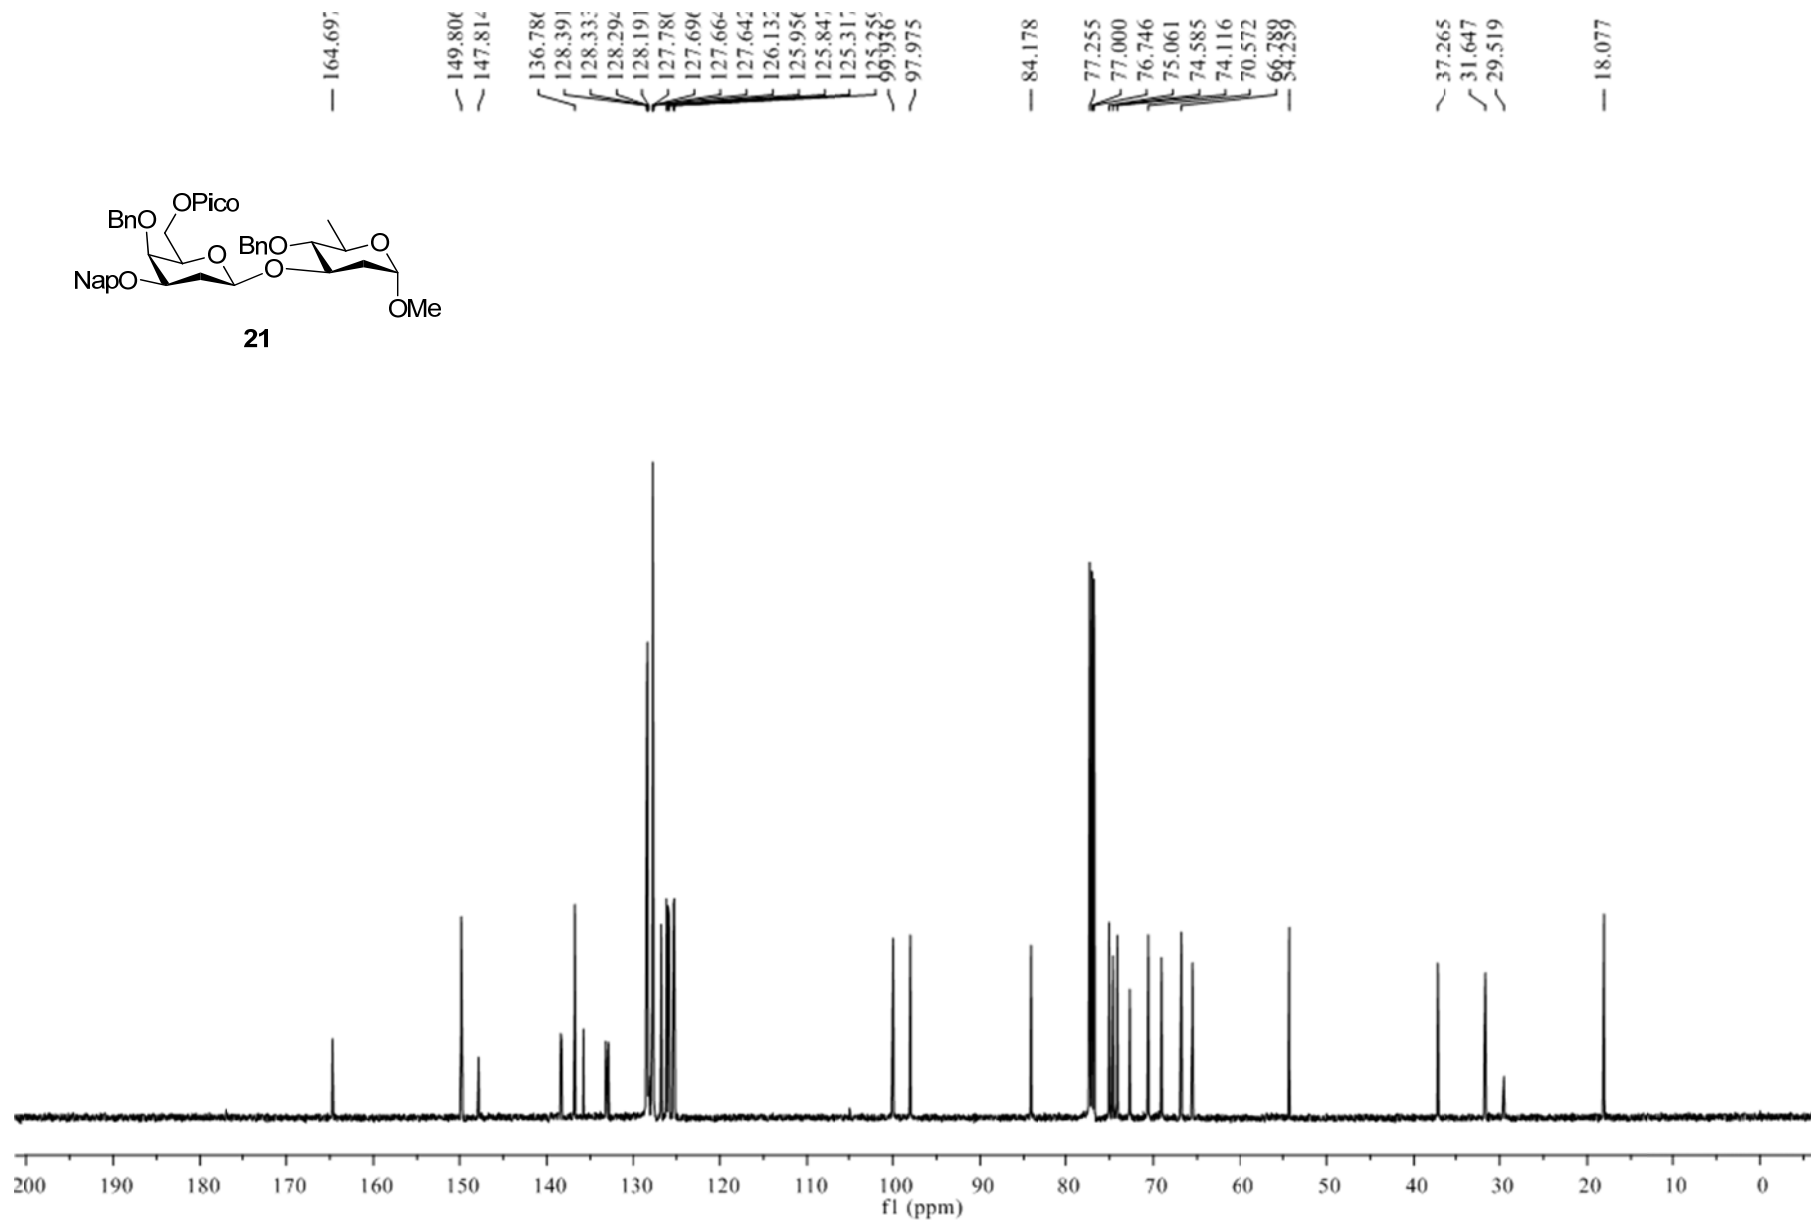

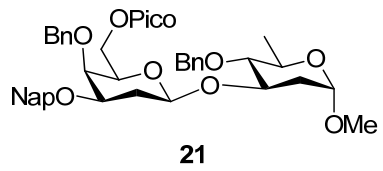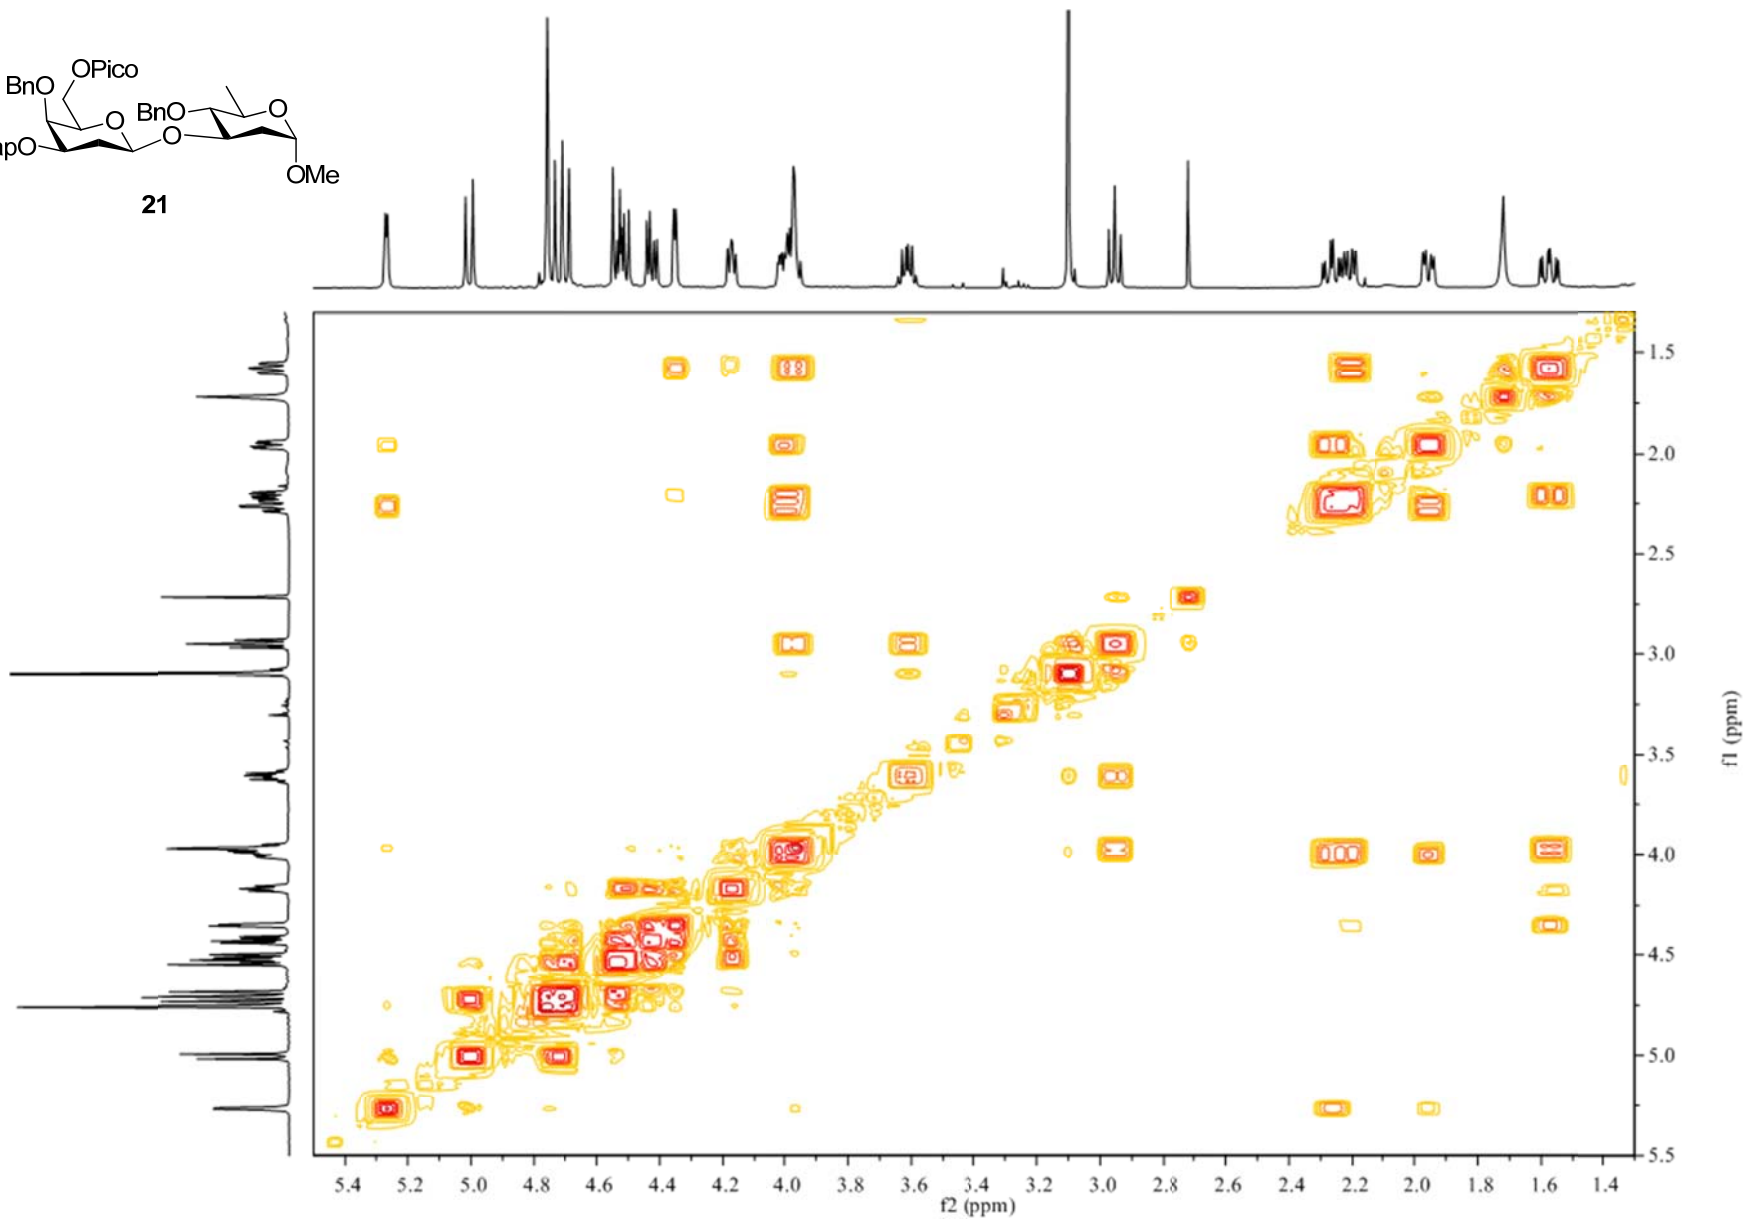

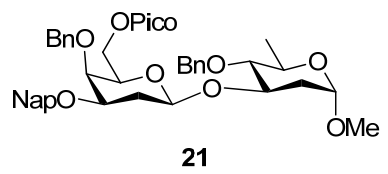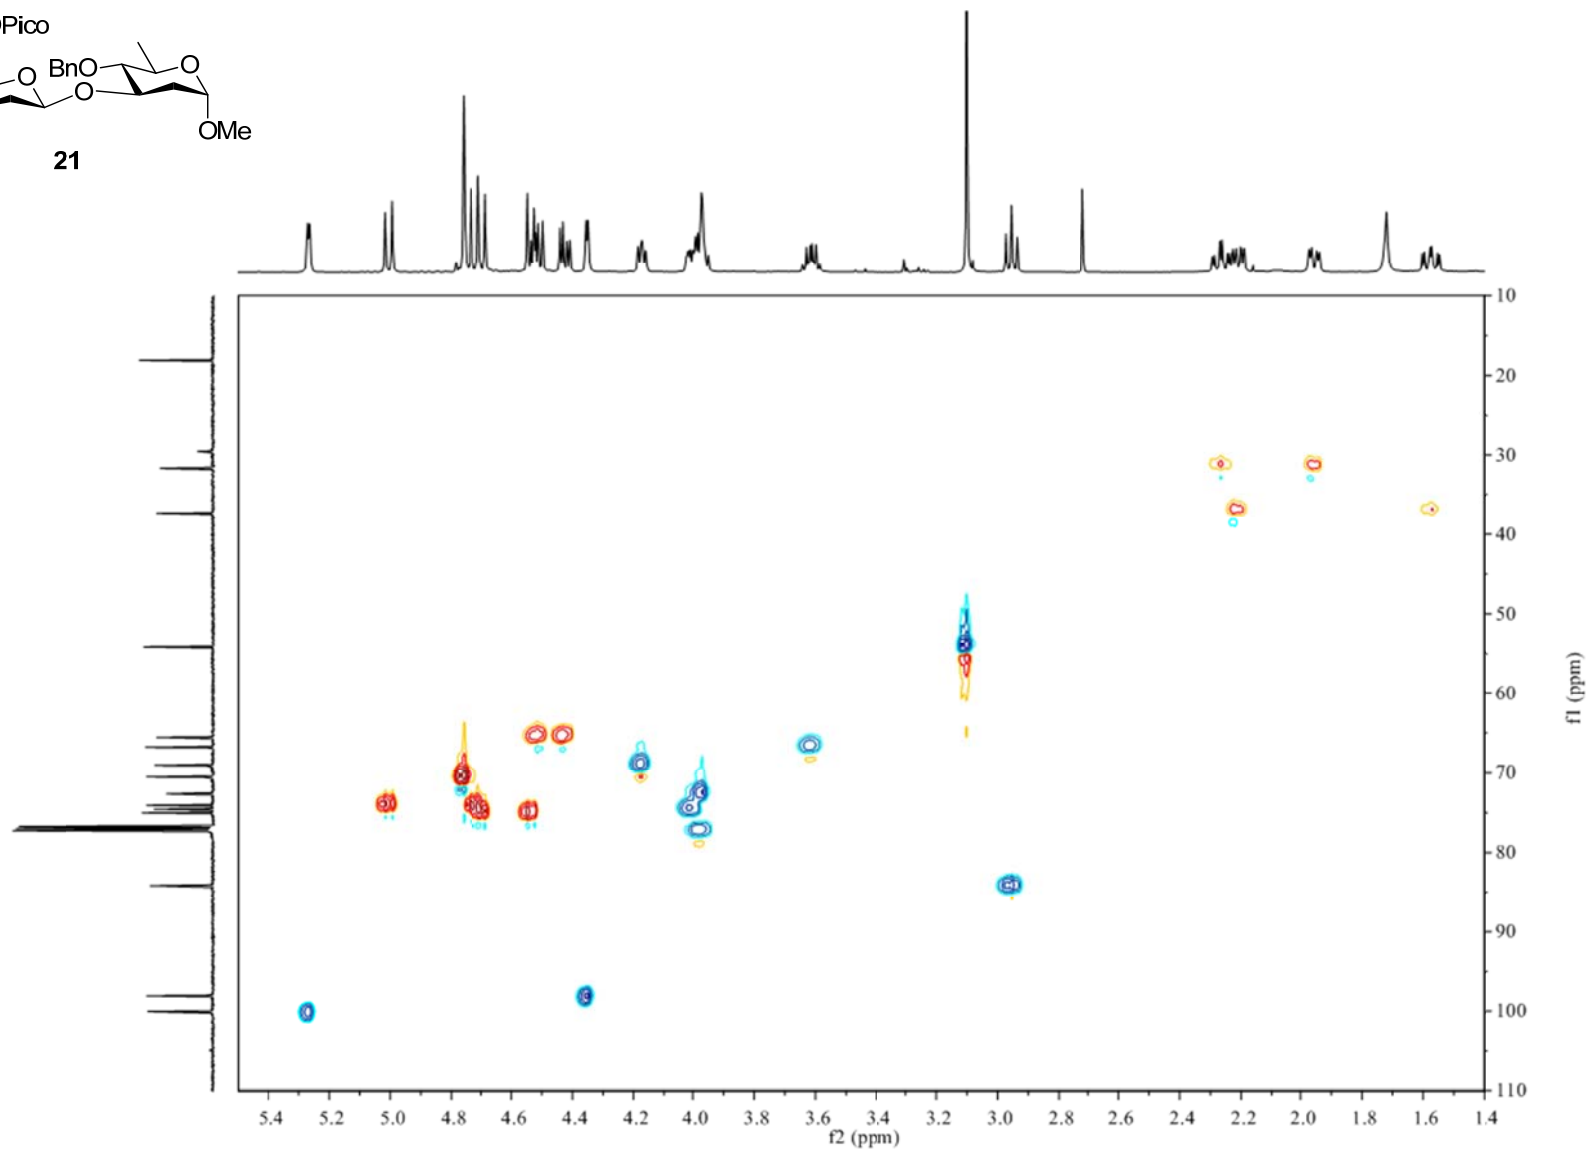

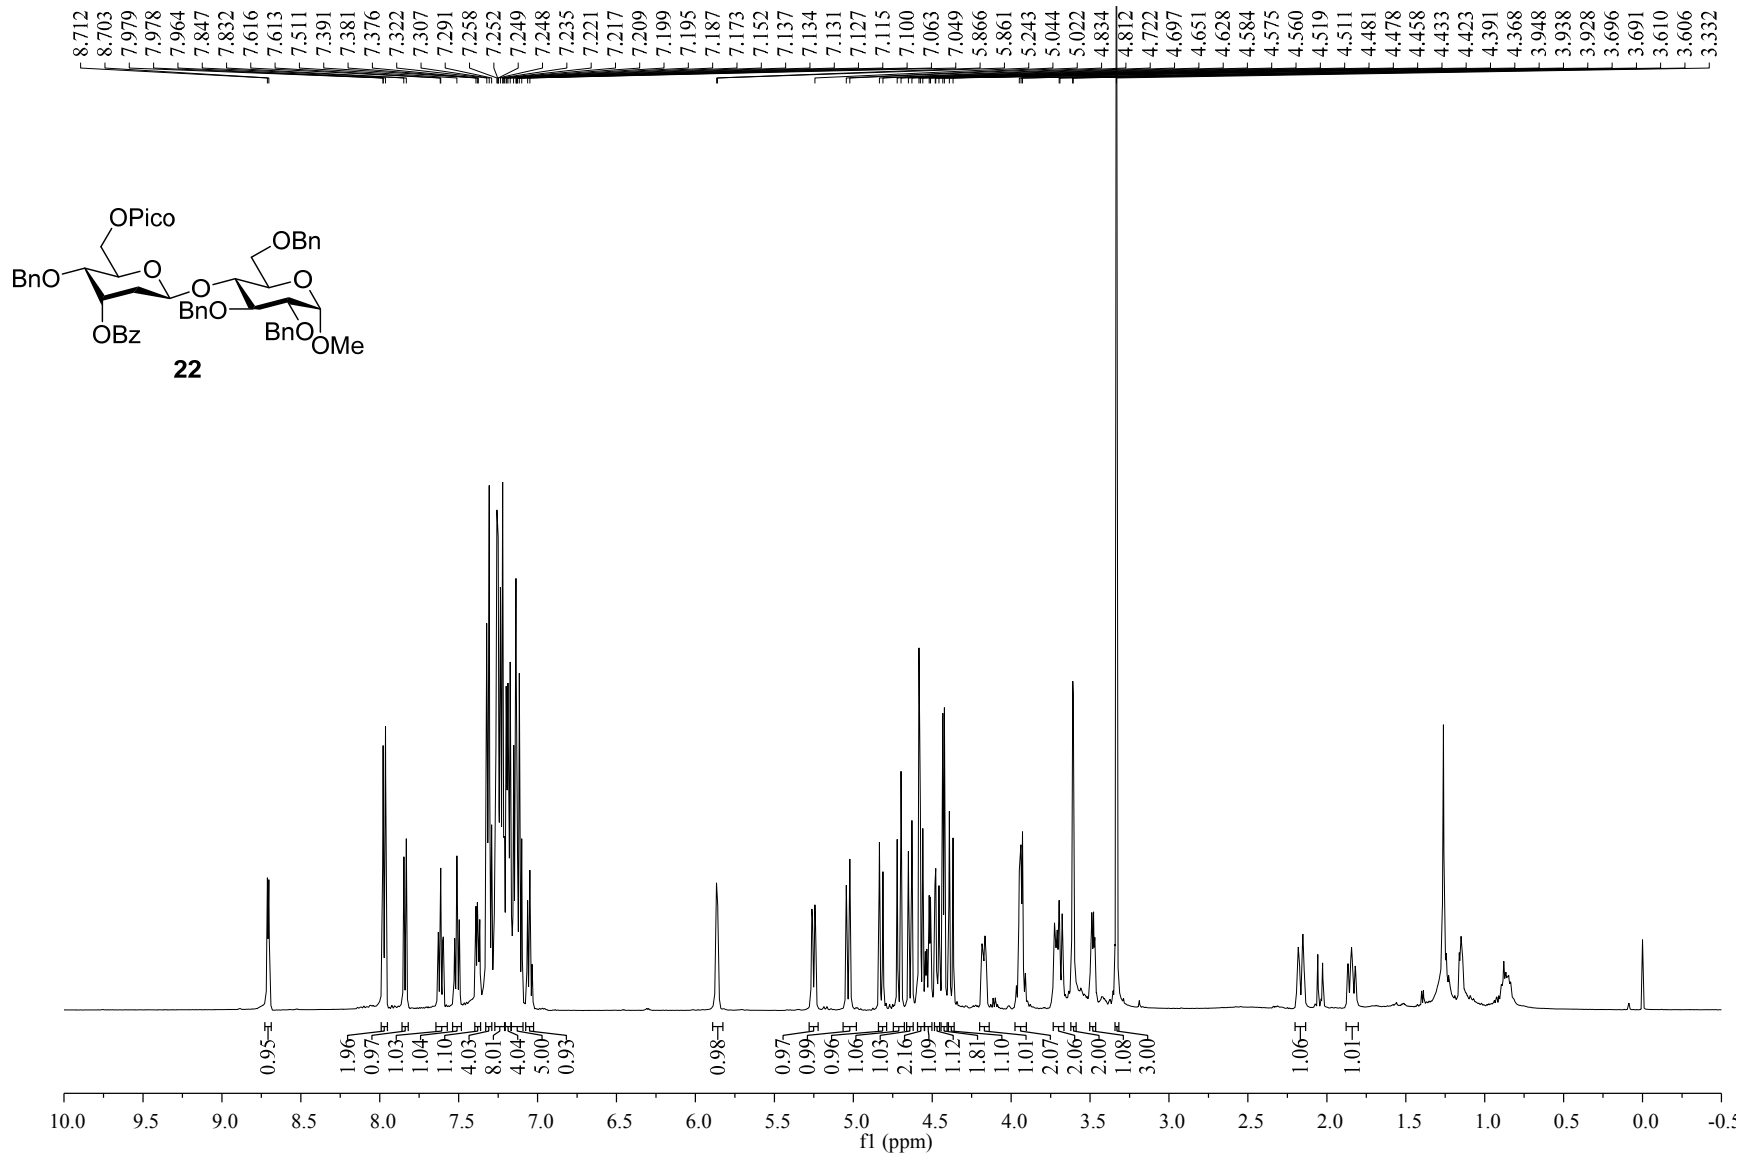

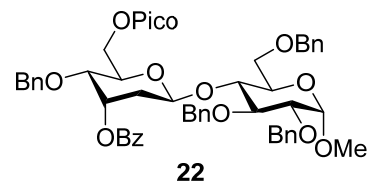

165.680  
164.587

149.868  
147.811

138.291  
136.810

129.767  
128.575

128.439  
128.412

128.154  
128.131

127.889  
127.875

127.696  
127.430

127.402  
127.251

98.849  
98.815

98.301

80.559  
79.347

76.851  
75.247

73.549  
73.396

72.634  
71.864

71.185  
69.738

68.493  
66.598

64.926  
55.298

36.035

<sup>13</sup>C-nondecoupling:  
 $J_{CH} = 160.6$  Hz  
 $J_{CH} = 167.1$  Hz

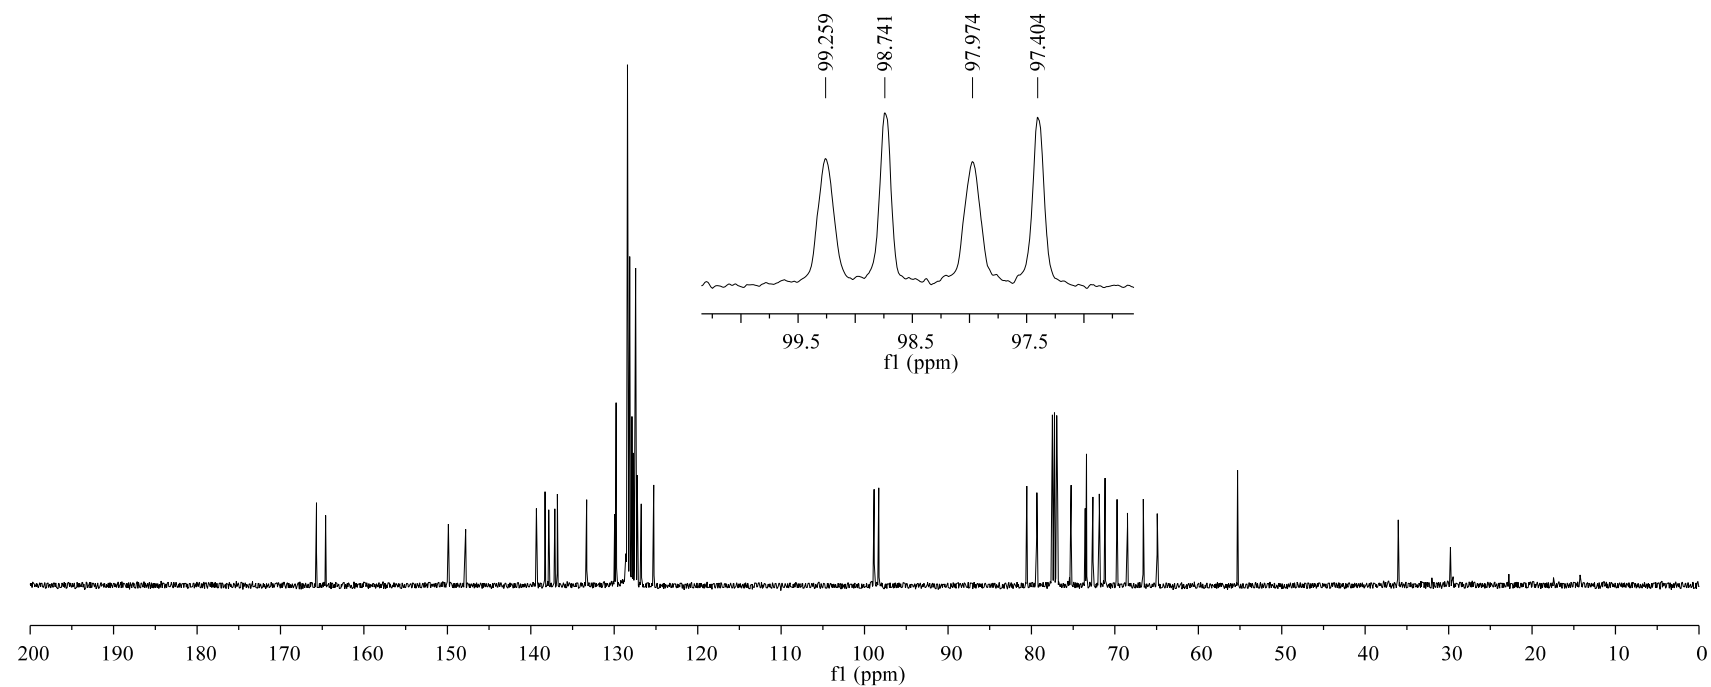

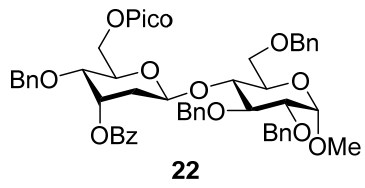

22

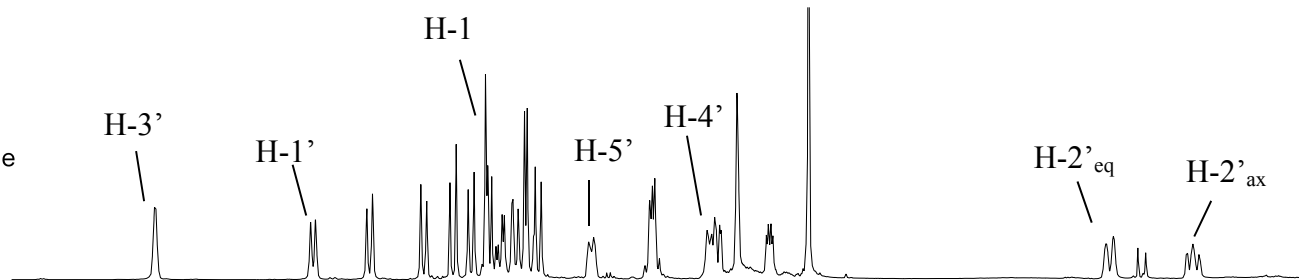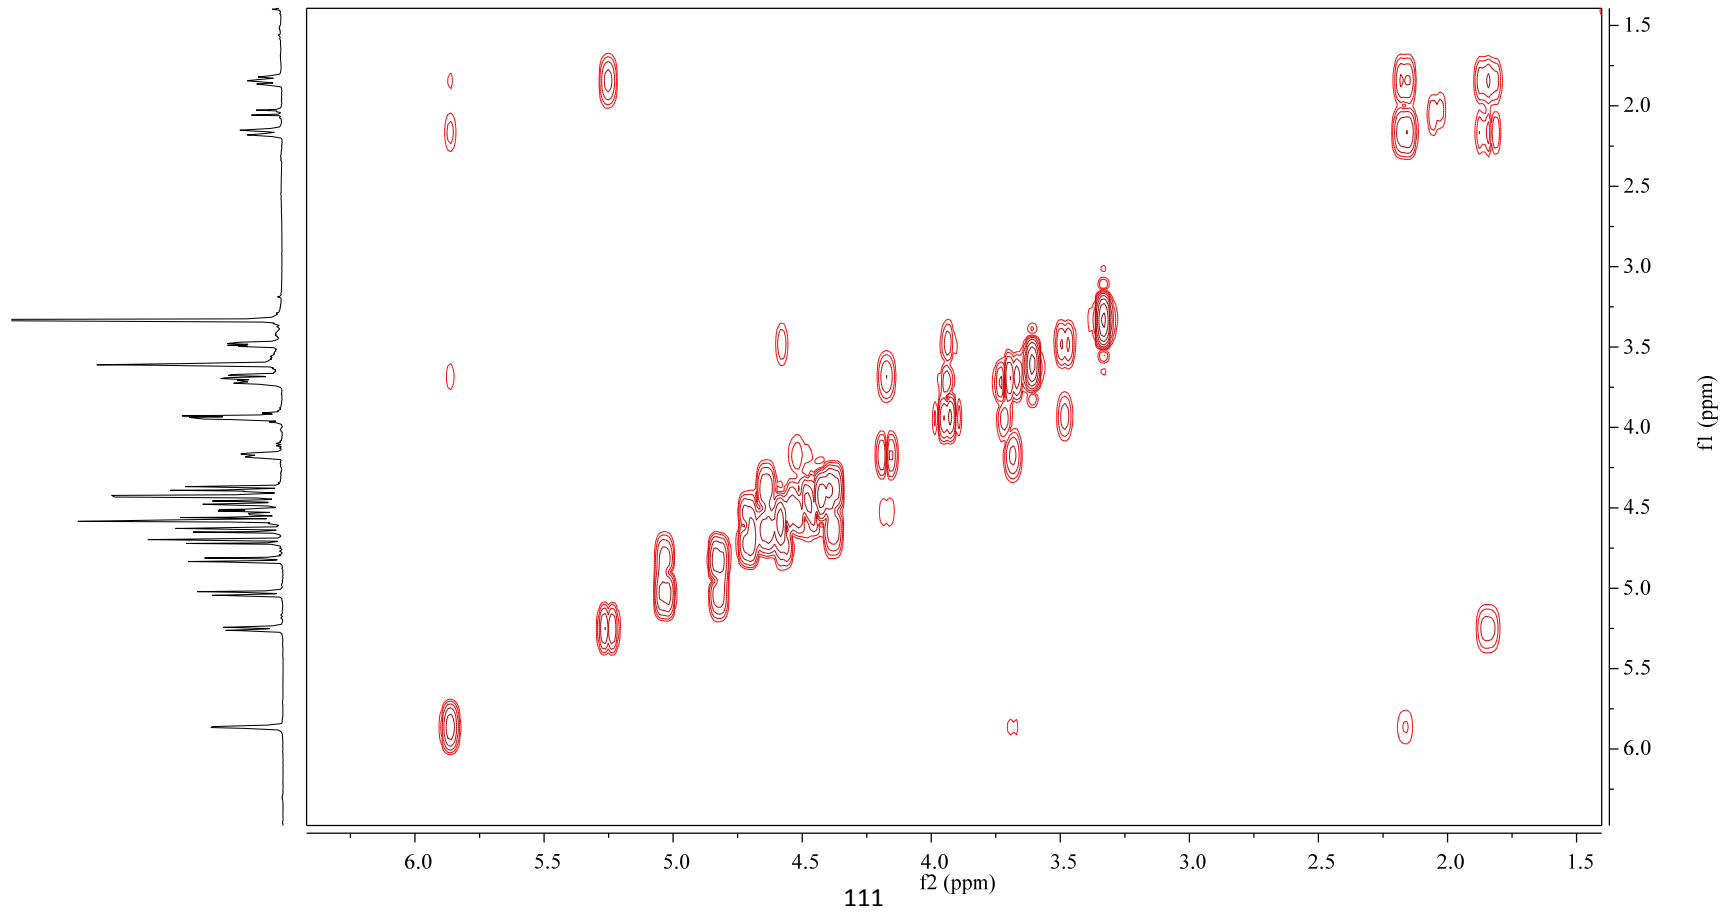

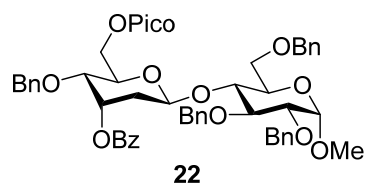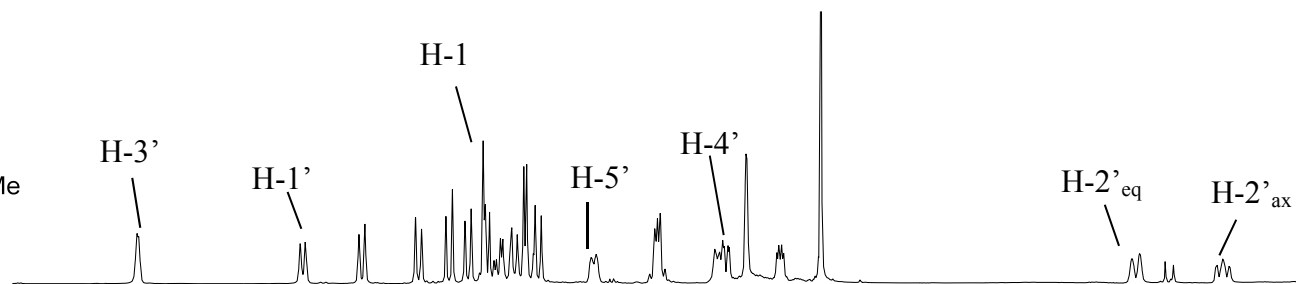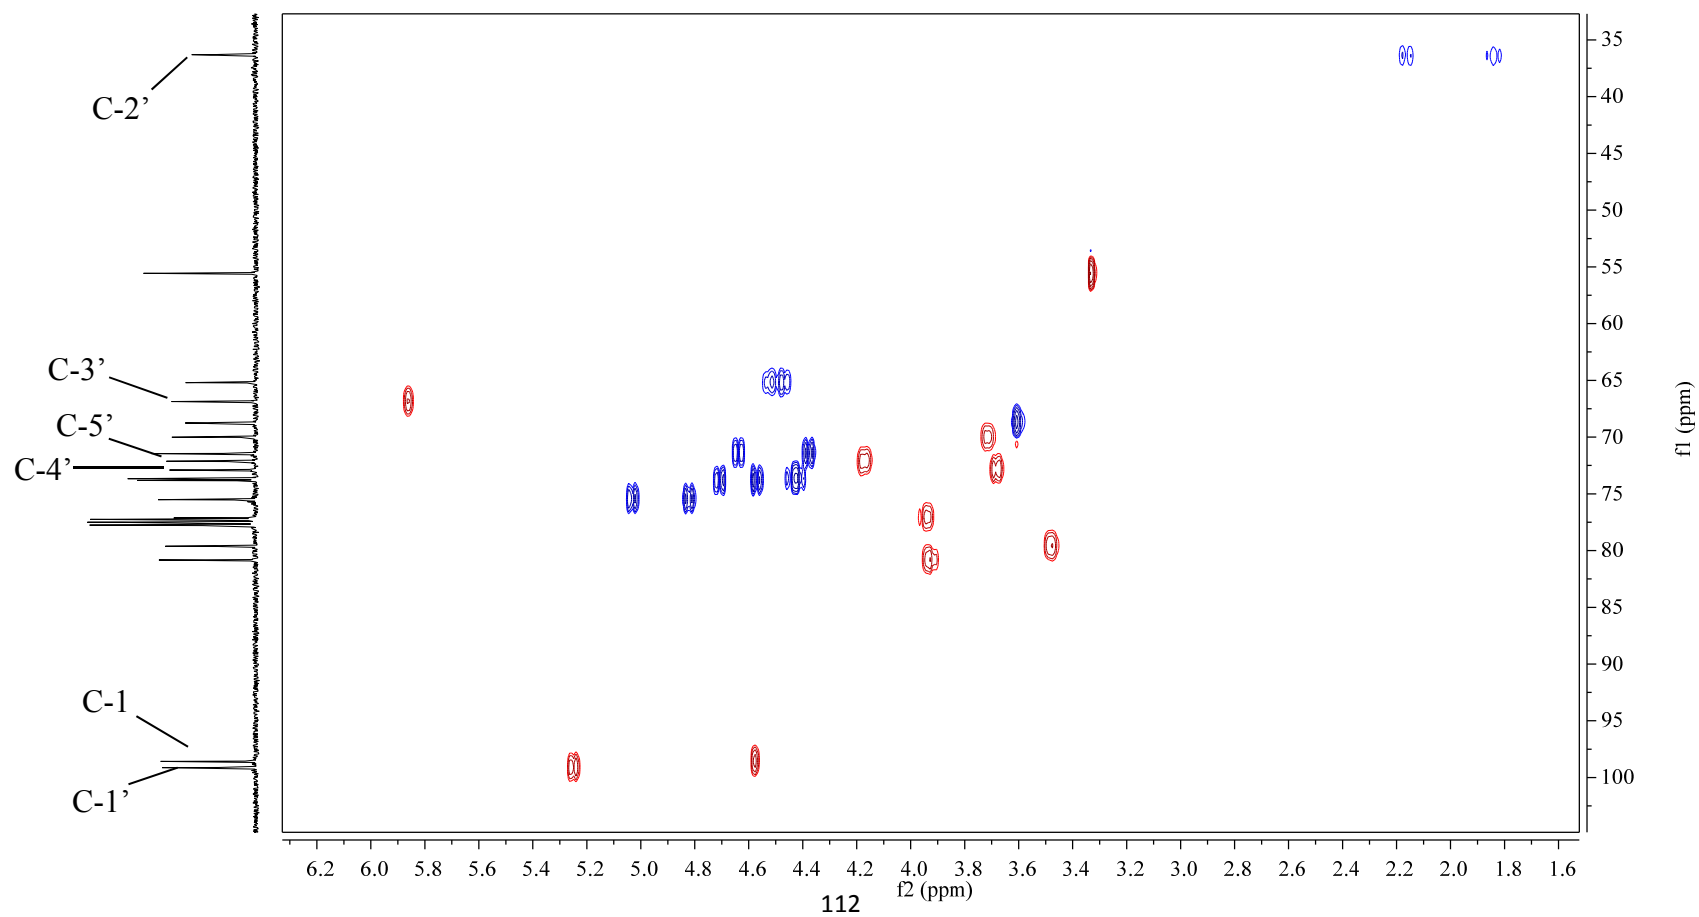



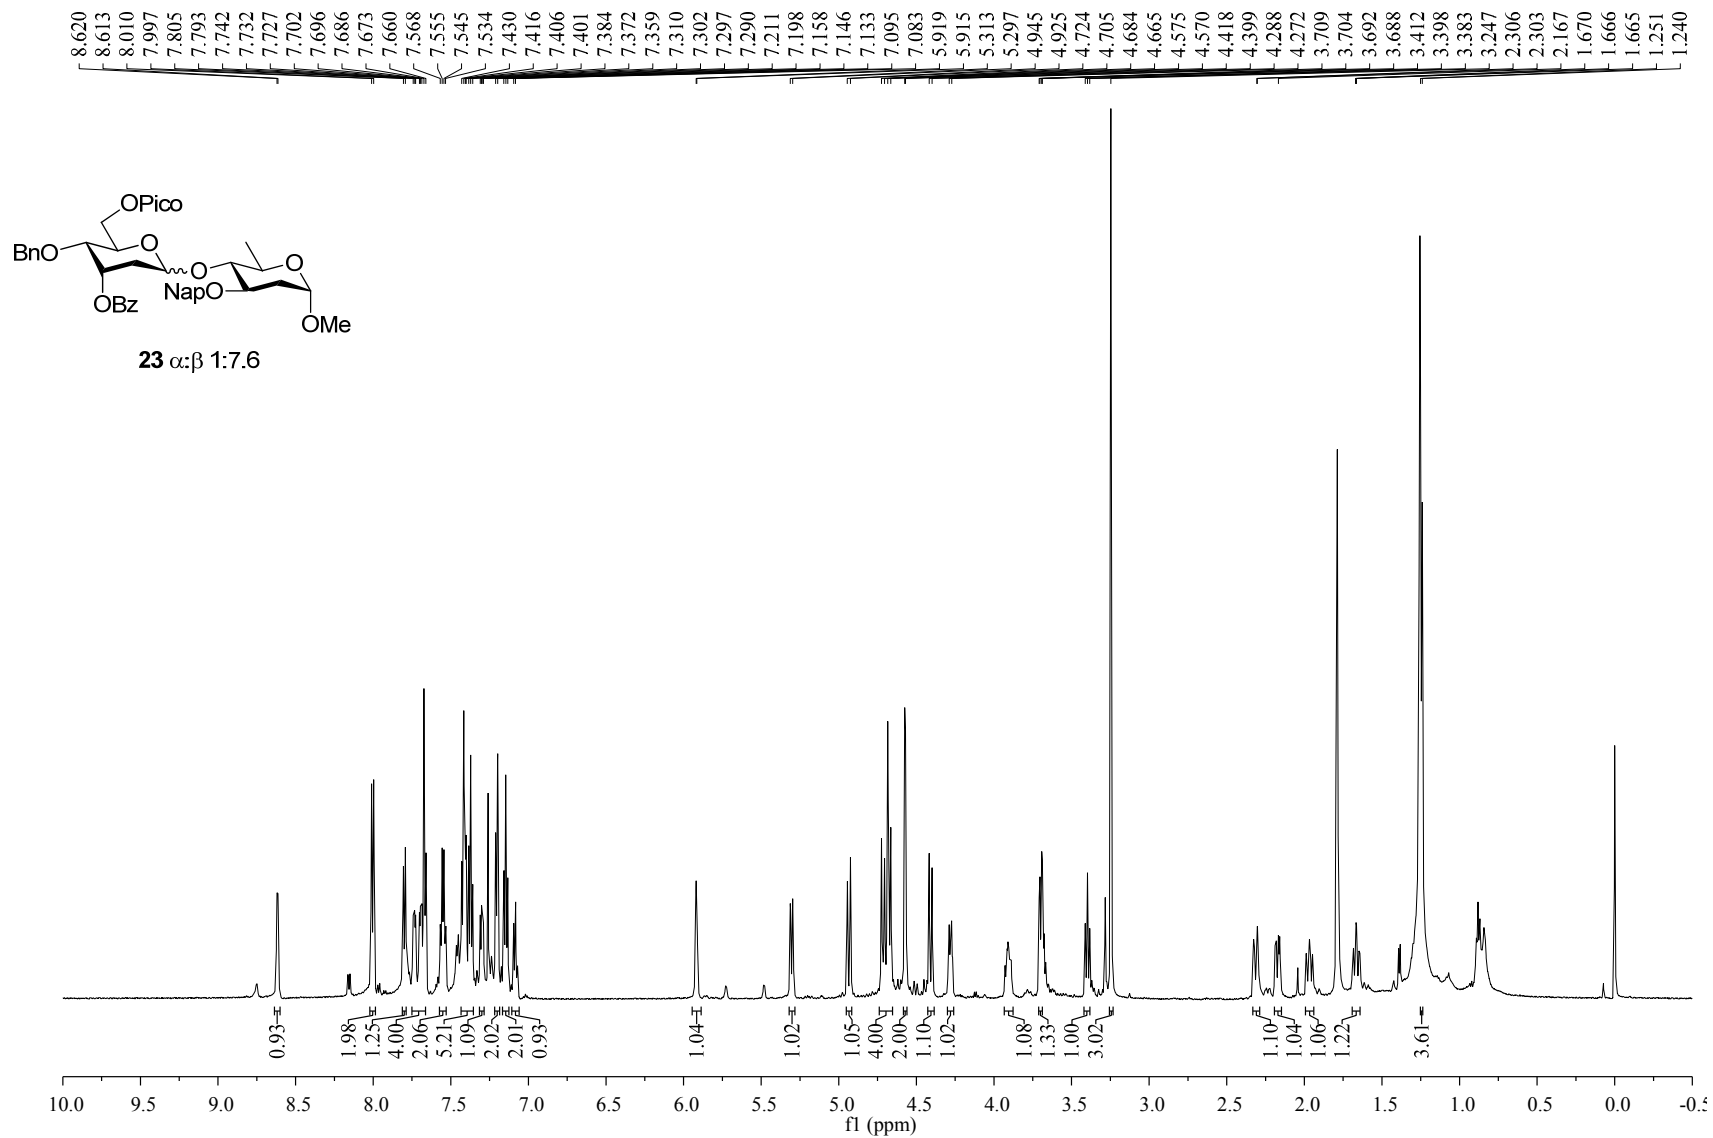

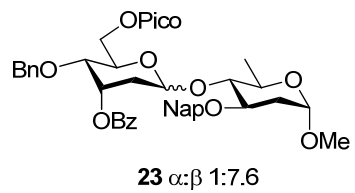

165.853  
164.836

149.833  
147.845

136.772  
133.410  
129.869  
128.693  
128.539  
128.493  
128.070  
128.015  
127.952  
127.856  
126.094  
125.924  
125.804  
125.764  
99.306  
98.269

83.866  
75.598  
72.915  
72.295  
72.012  
71.286  
66.901  
66.780  
65.164  
54.703

36.222  
36.037

18.357

$^{13}\text{C}$ -nondecoupling:

$J_{CH'} = 153.8 \text{ Hz}$

$J_{CH} = 164.6 \text{ Hz}$

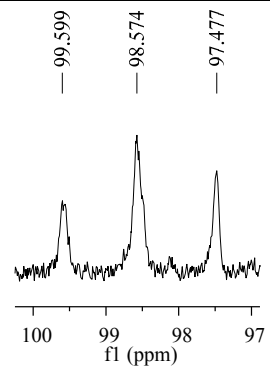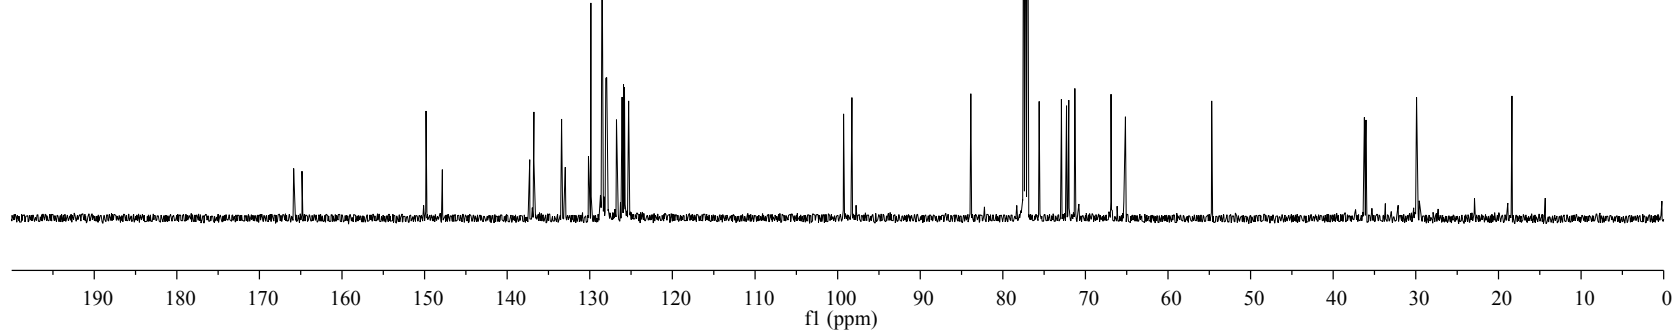

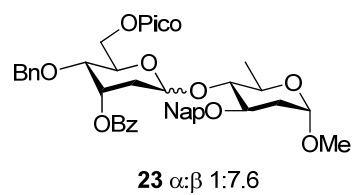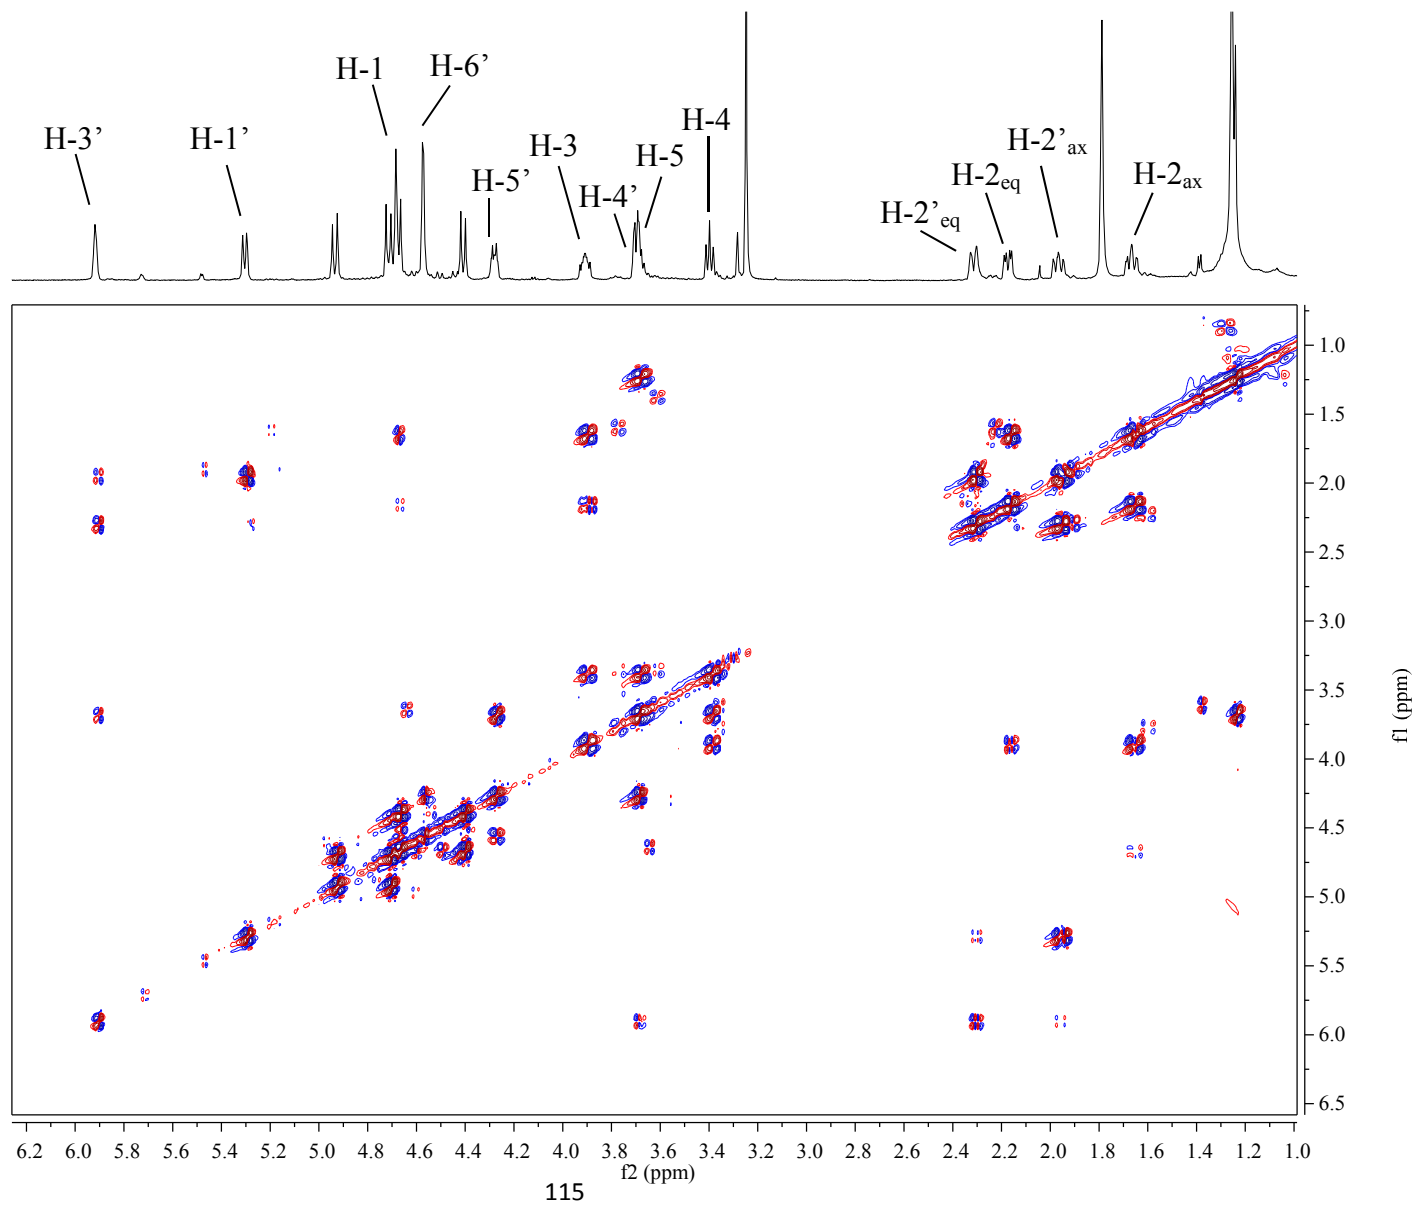

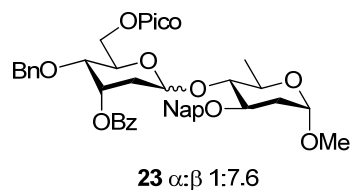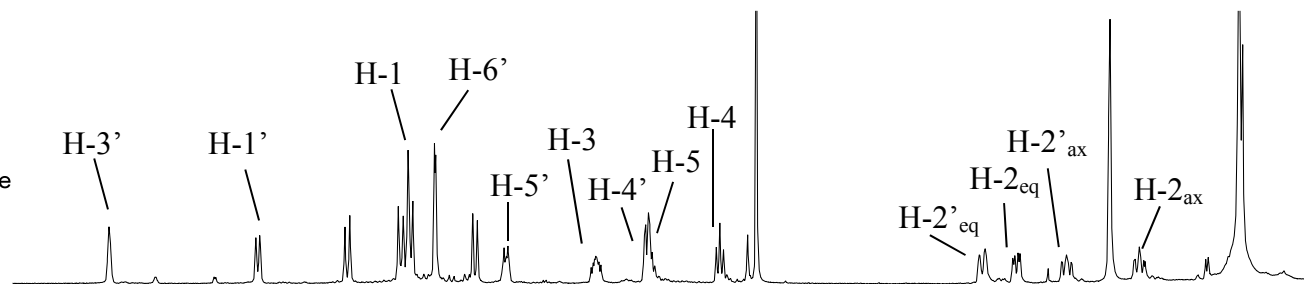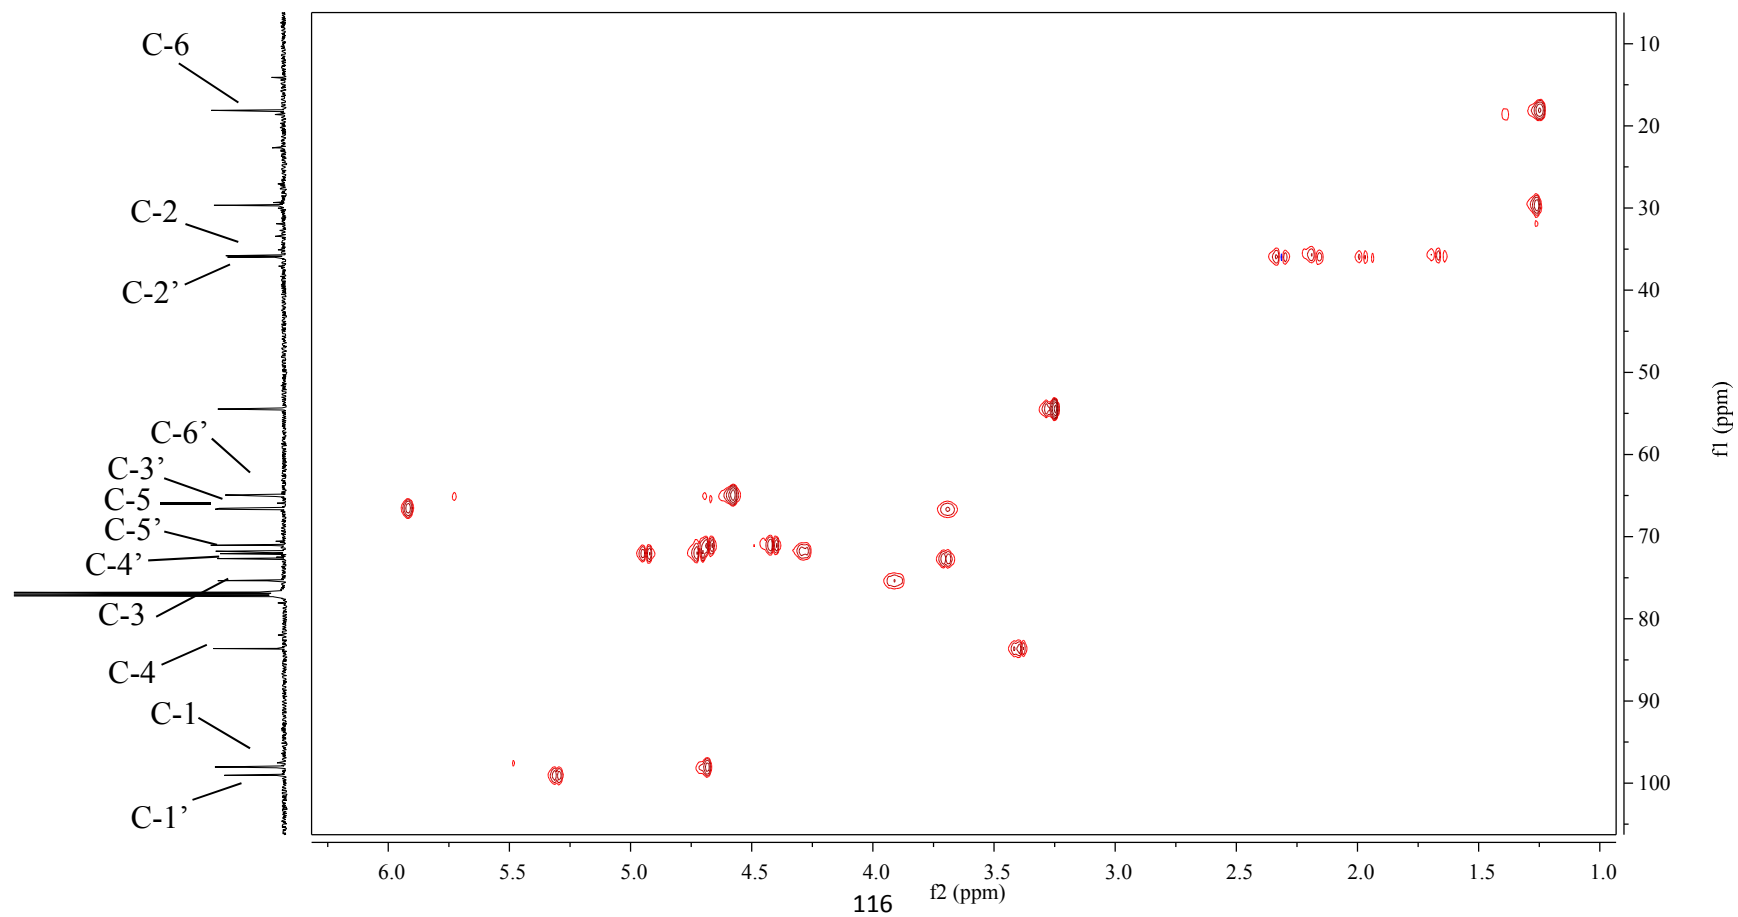

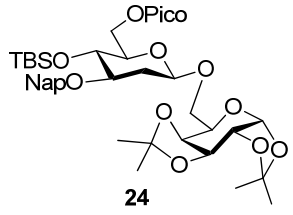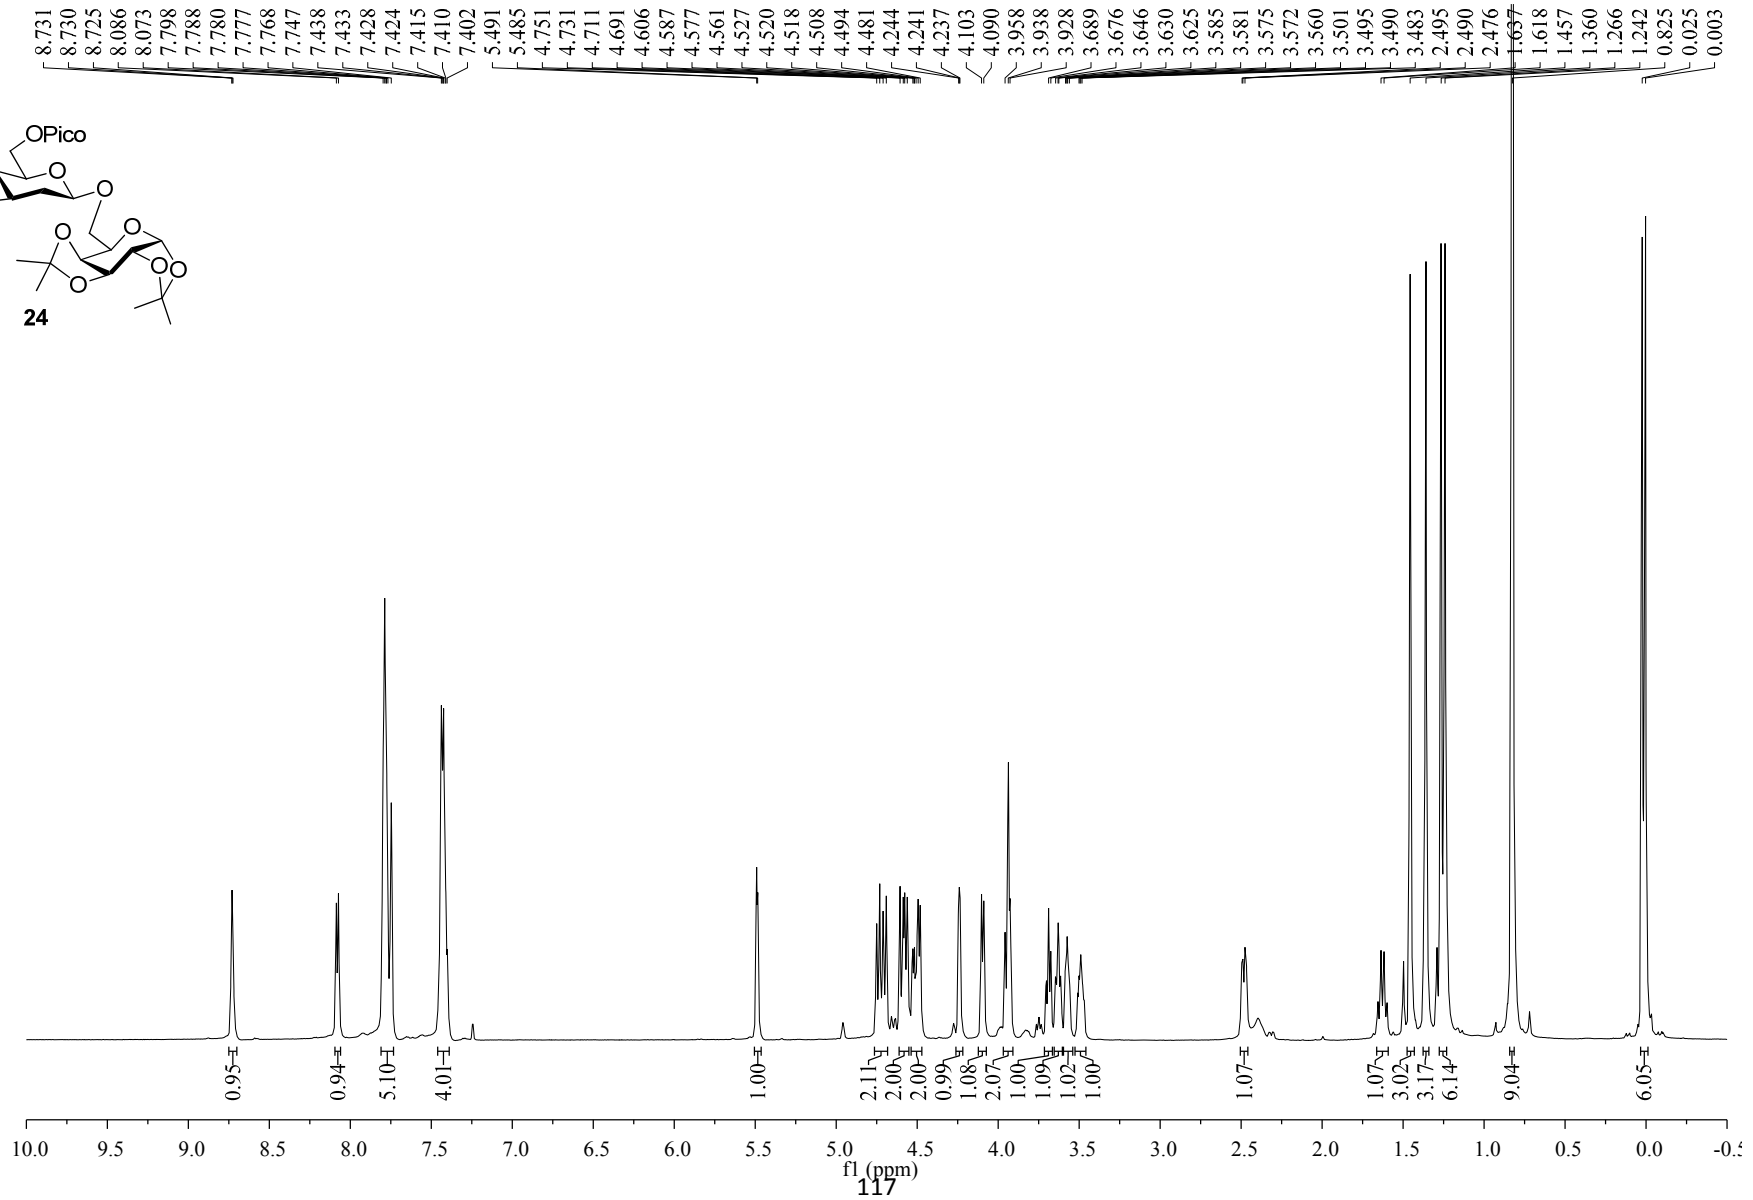

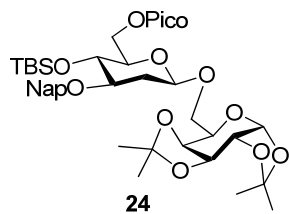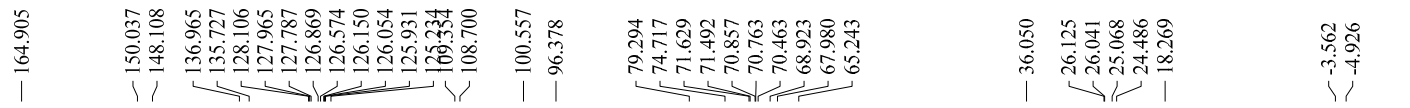

<sup>13</sup>C-nondecoupling:  
 $J_{CH'} = 157.1$  Hz  
 $J_{CH} = 178.5$  Hz

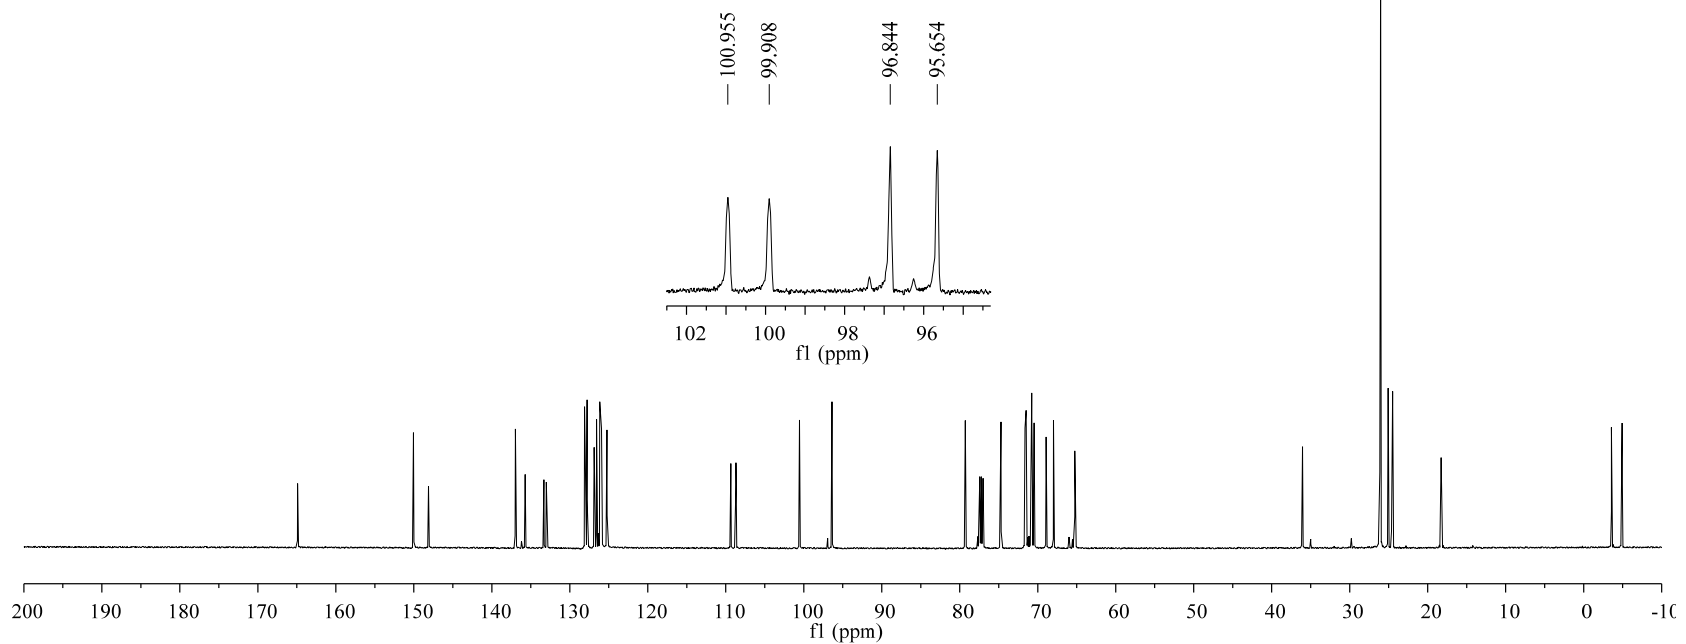

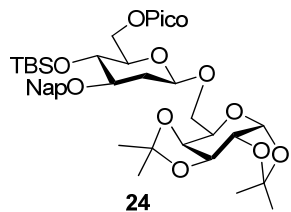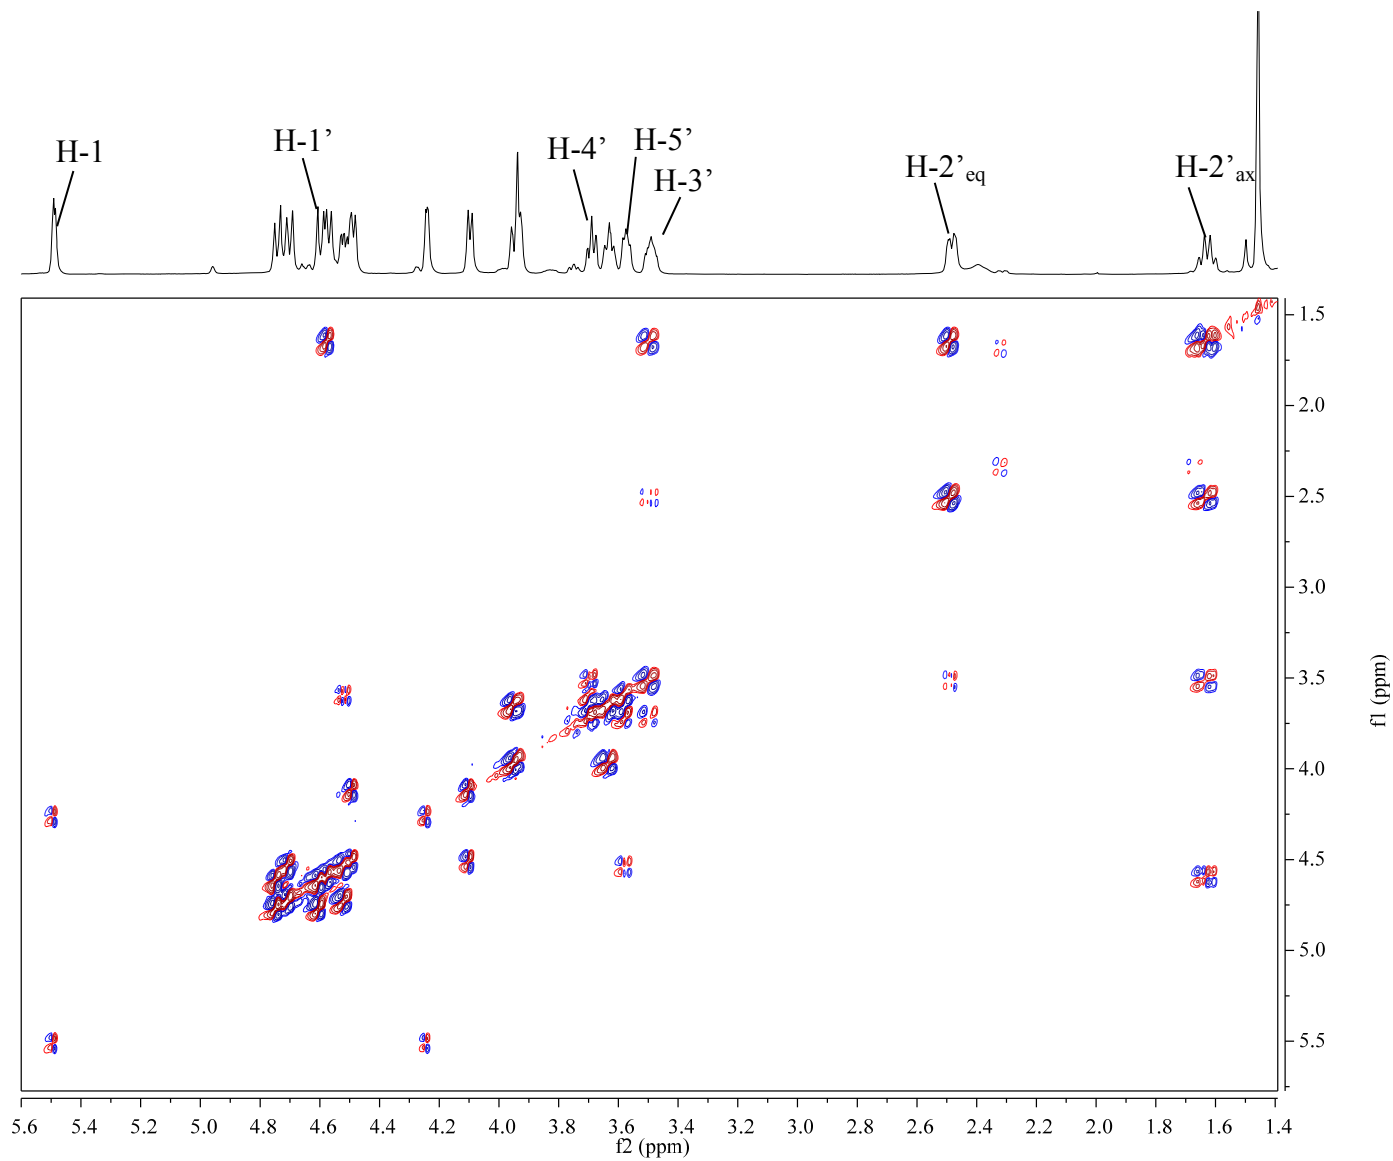

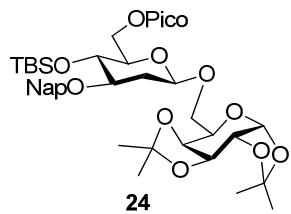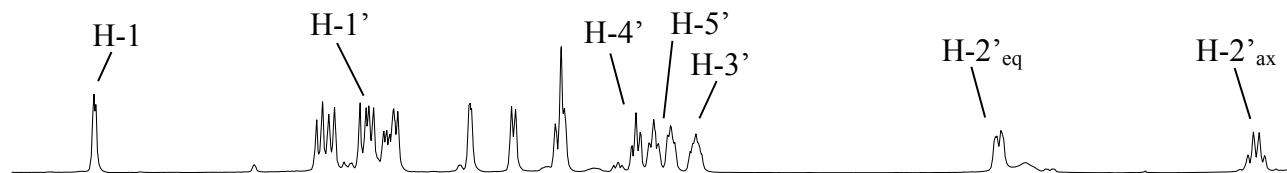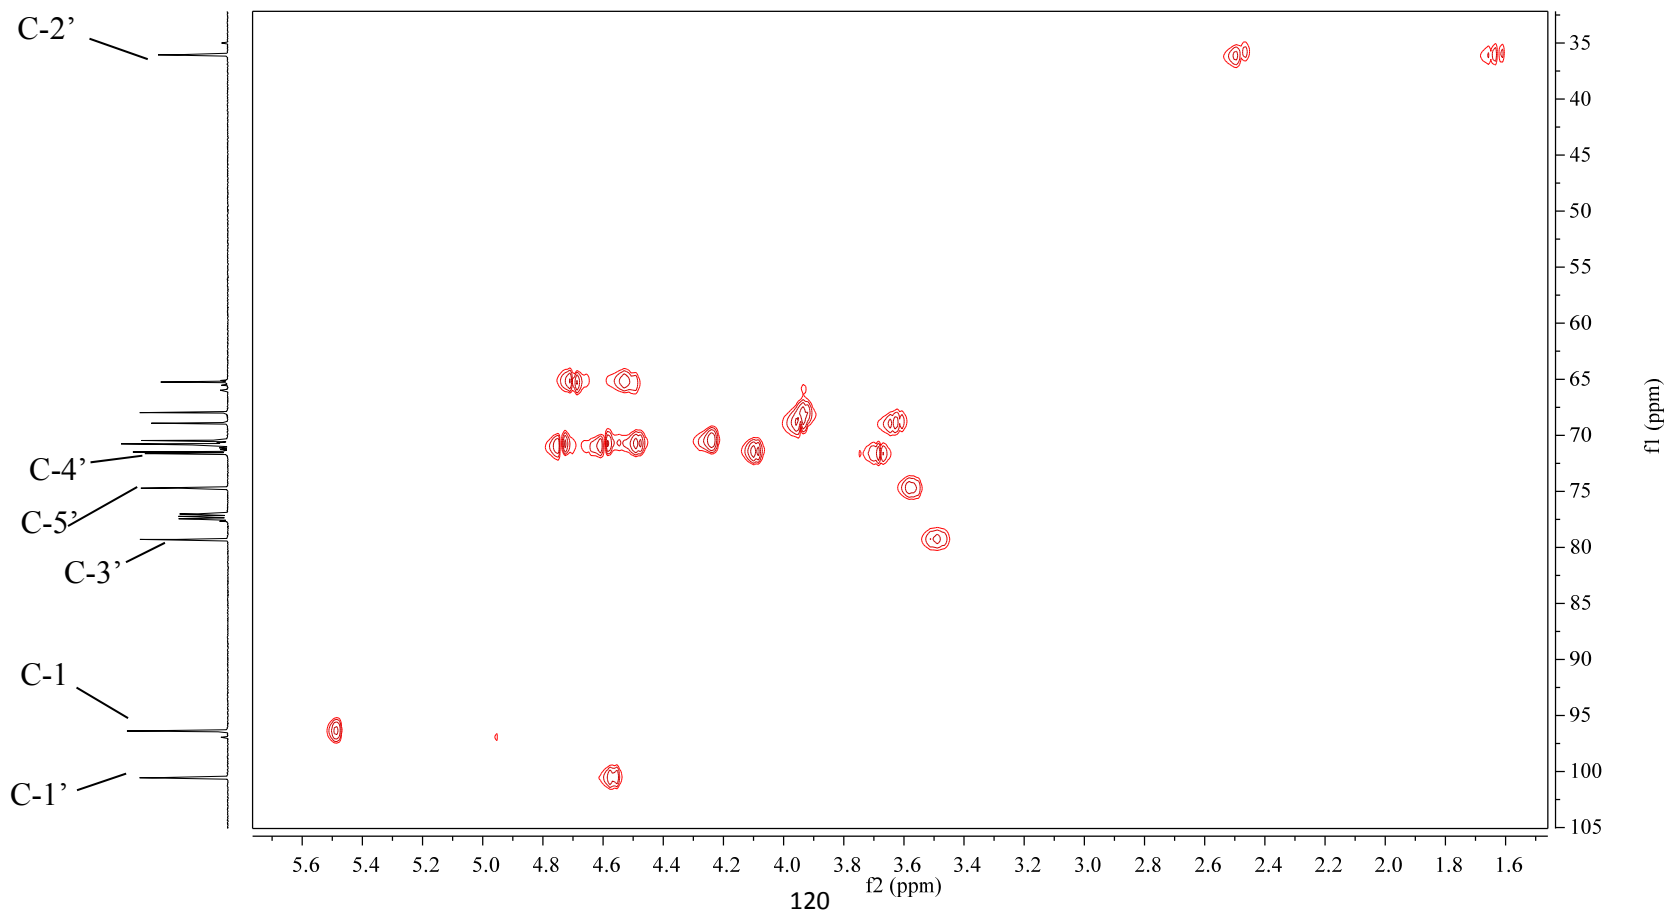



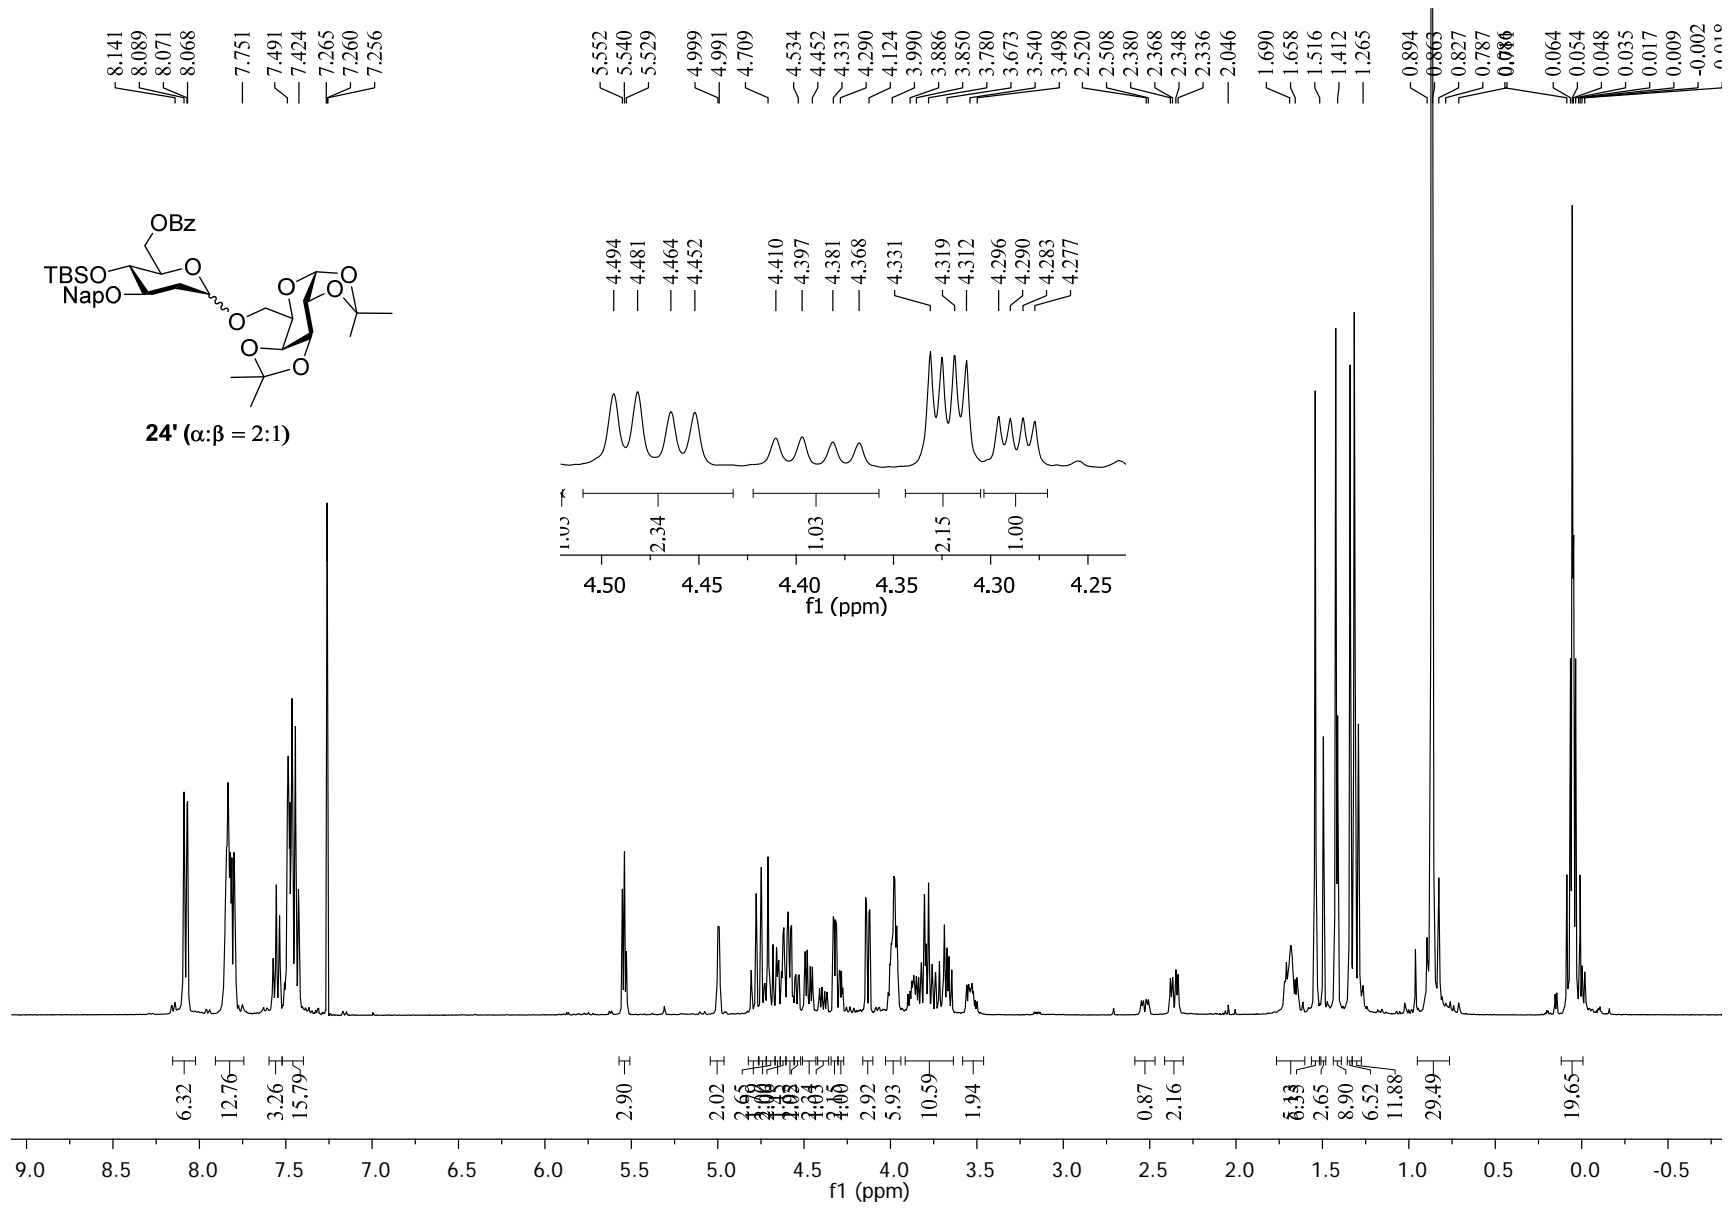

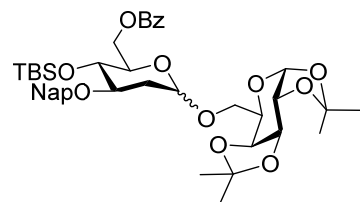

**24'** ( $\alpha:\beta = 2:1$ )

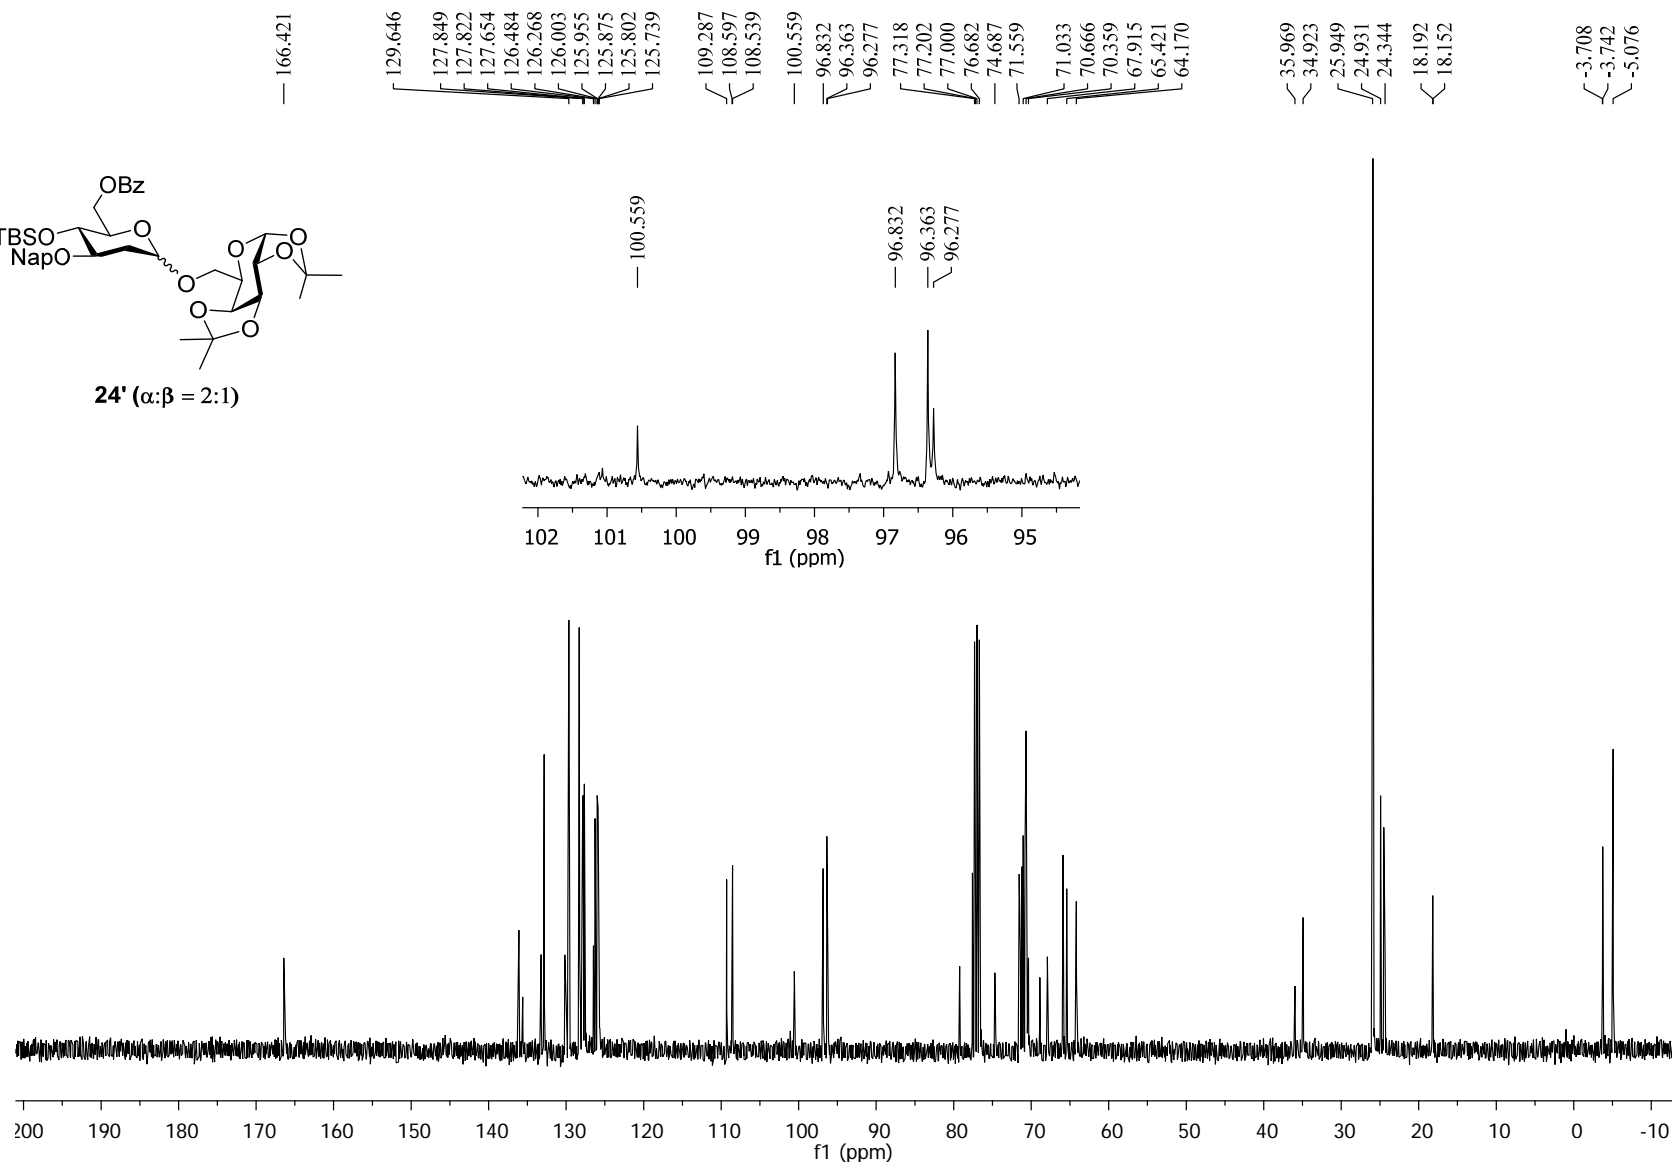

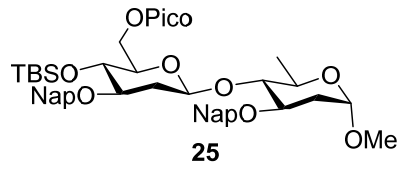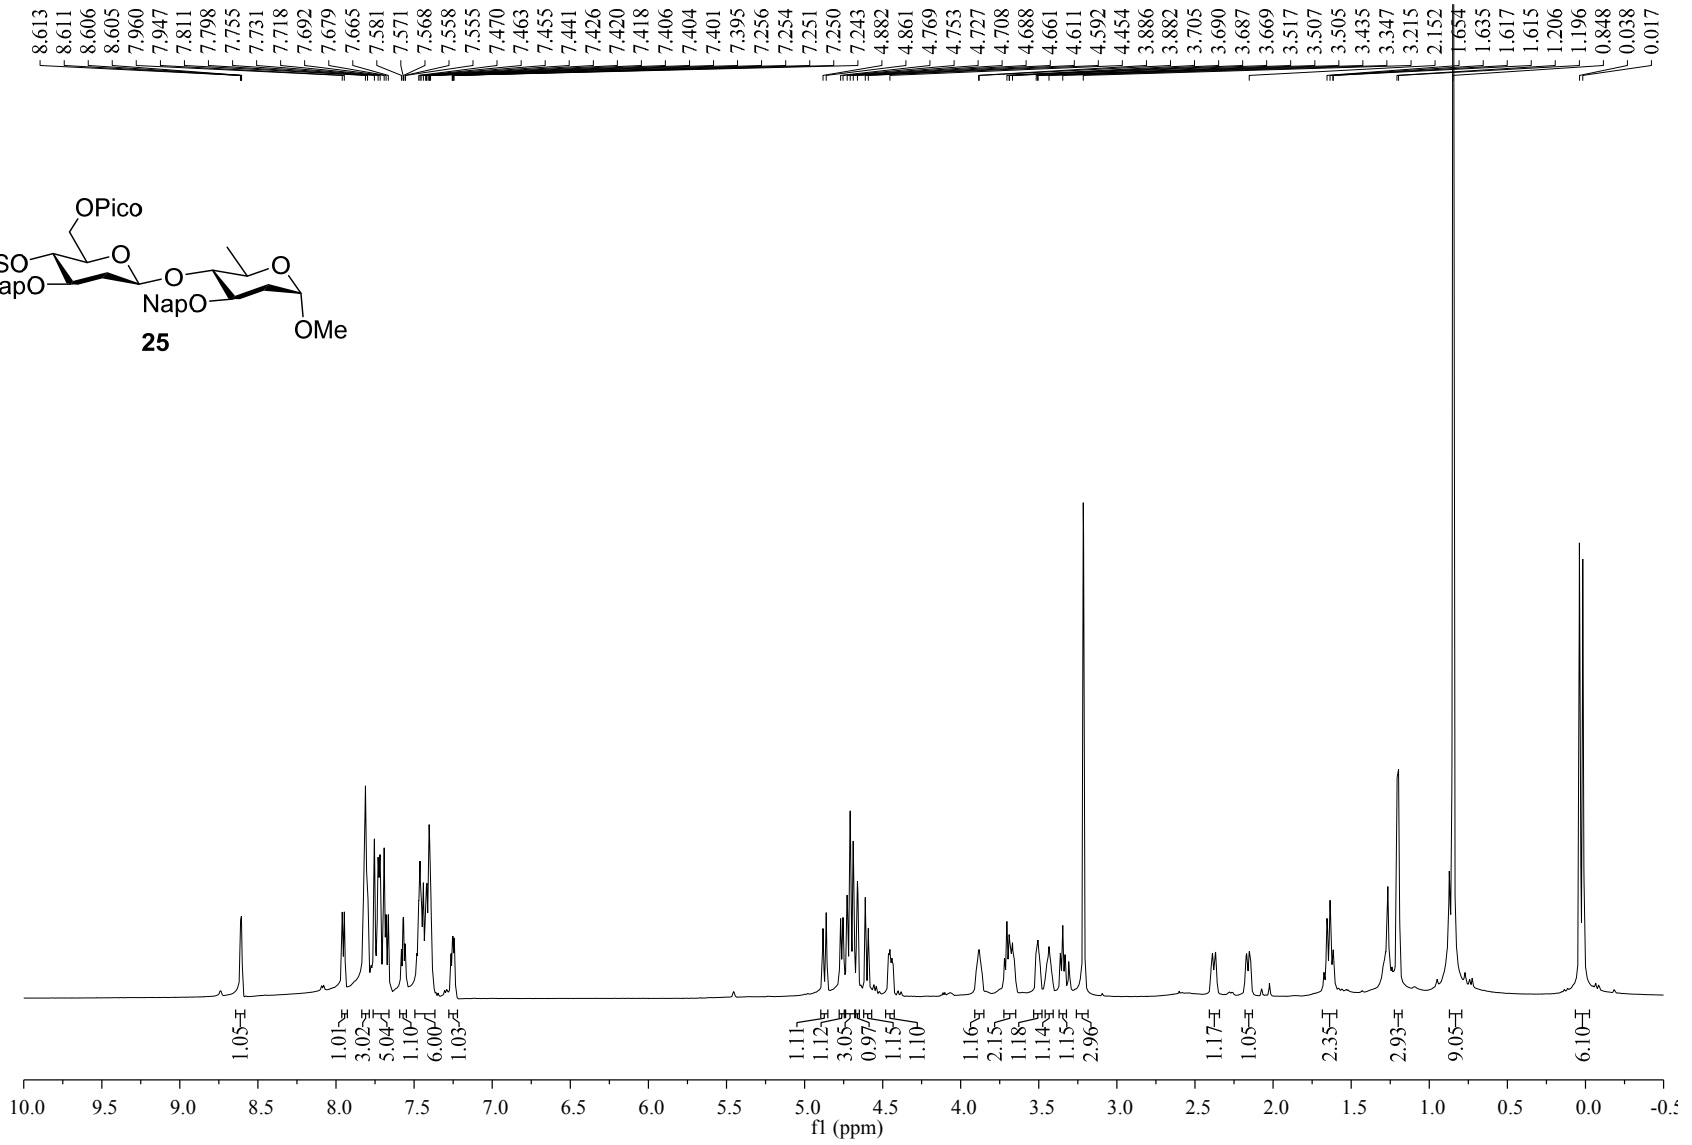

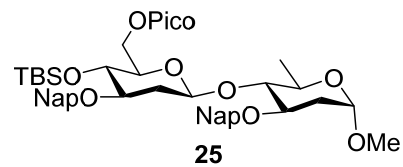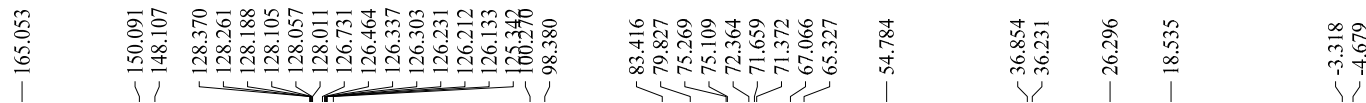

$^{13}\text{C}$ -nondecoupling:  
 $J_{CH'} = 157.1 \text{ Hz}$   
 $J_{CH} = 166.4 \text{ Hz}$

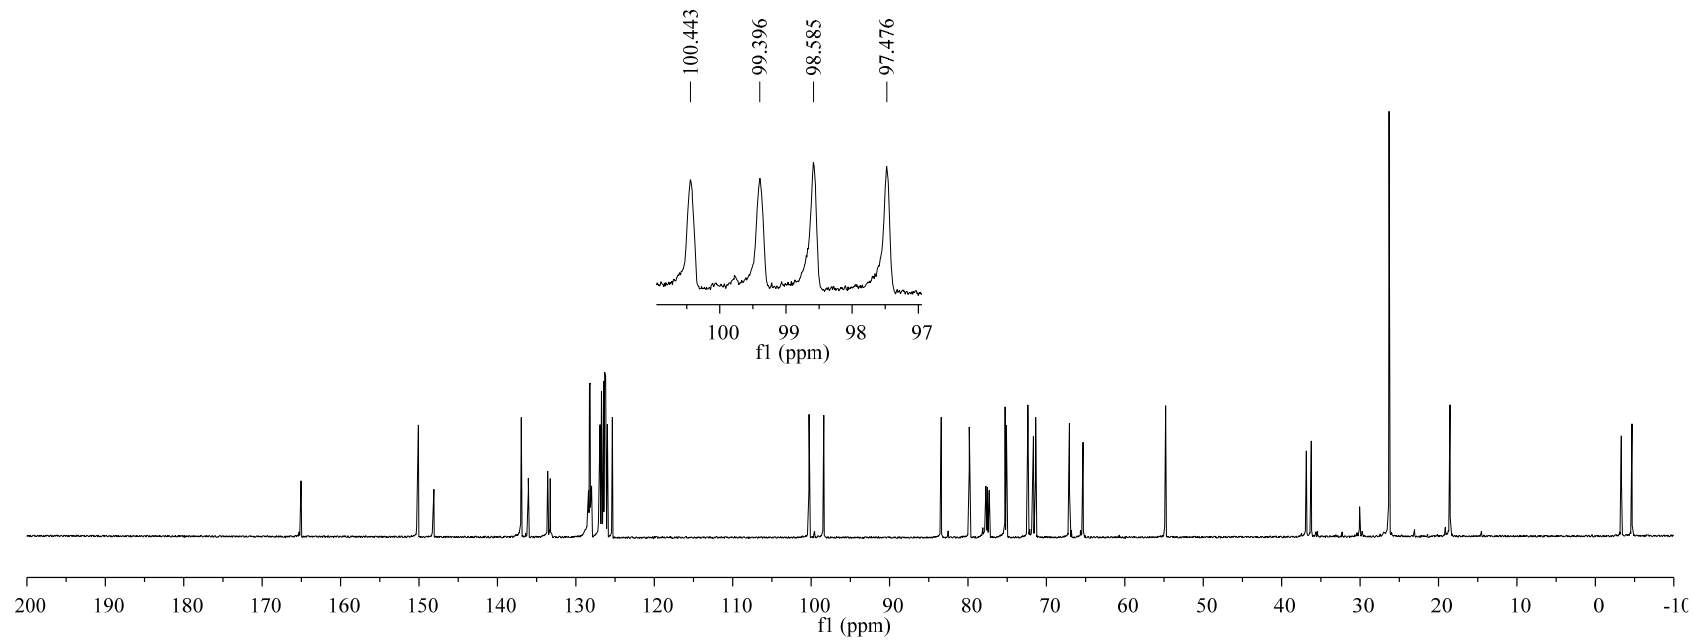



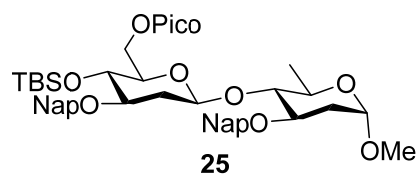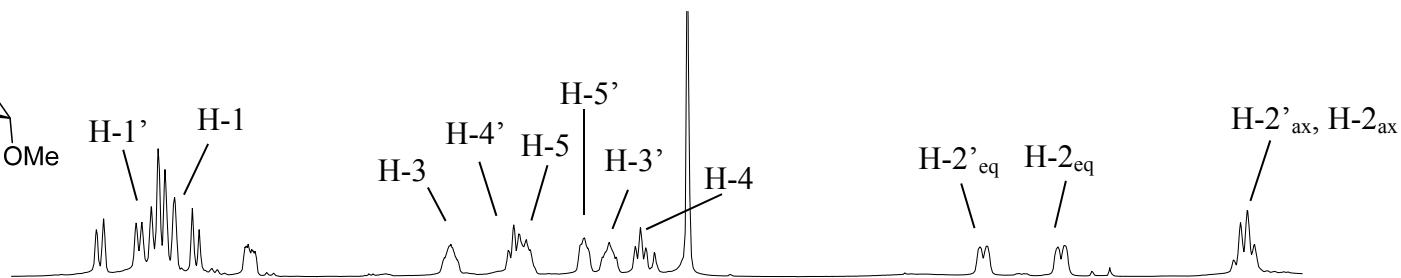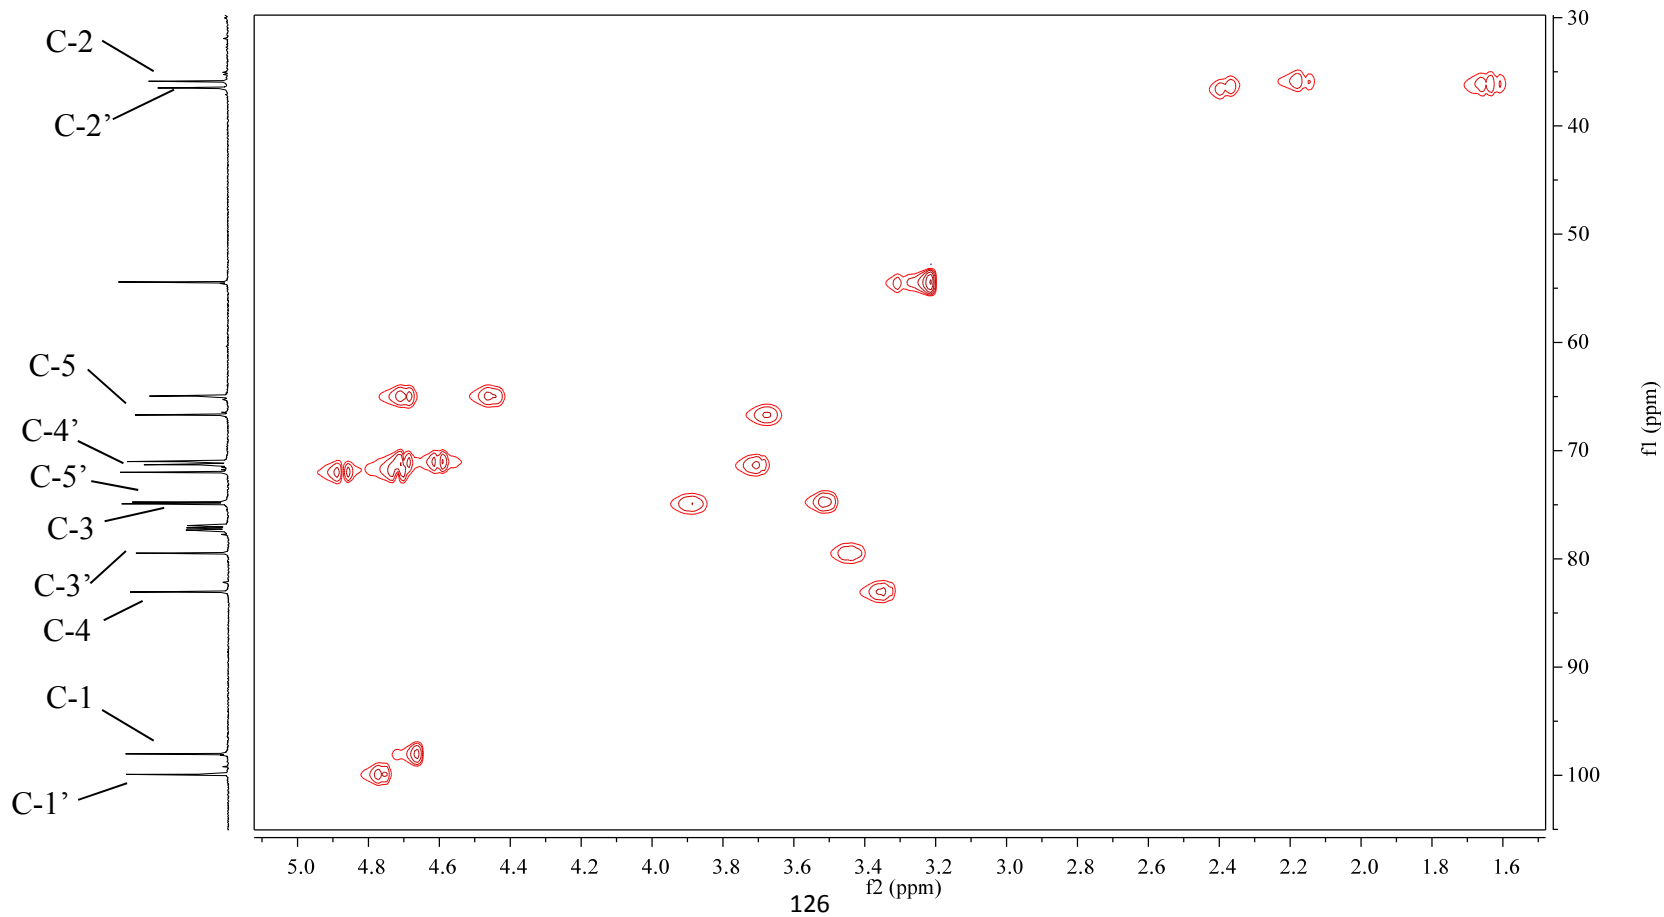

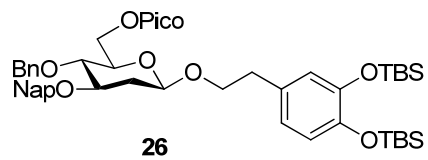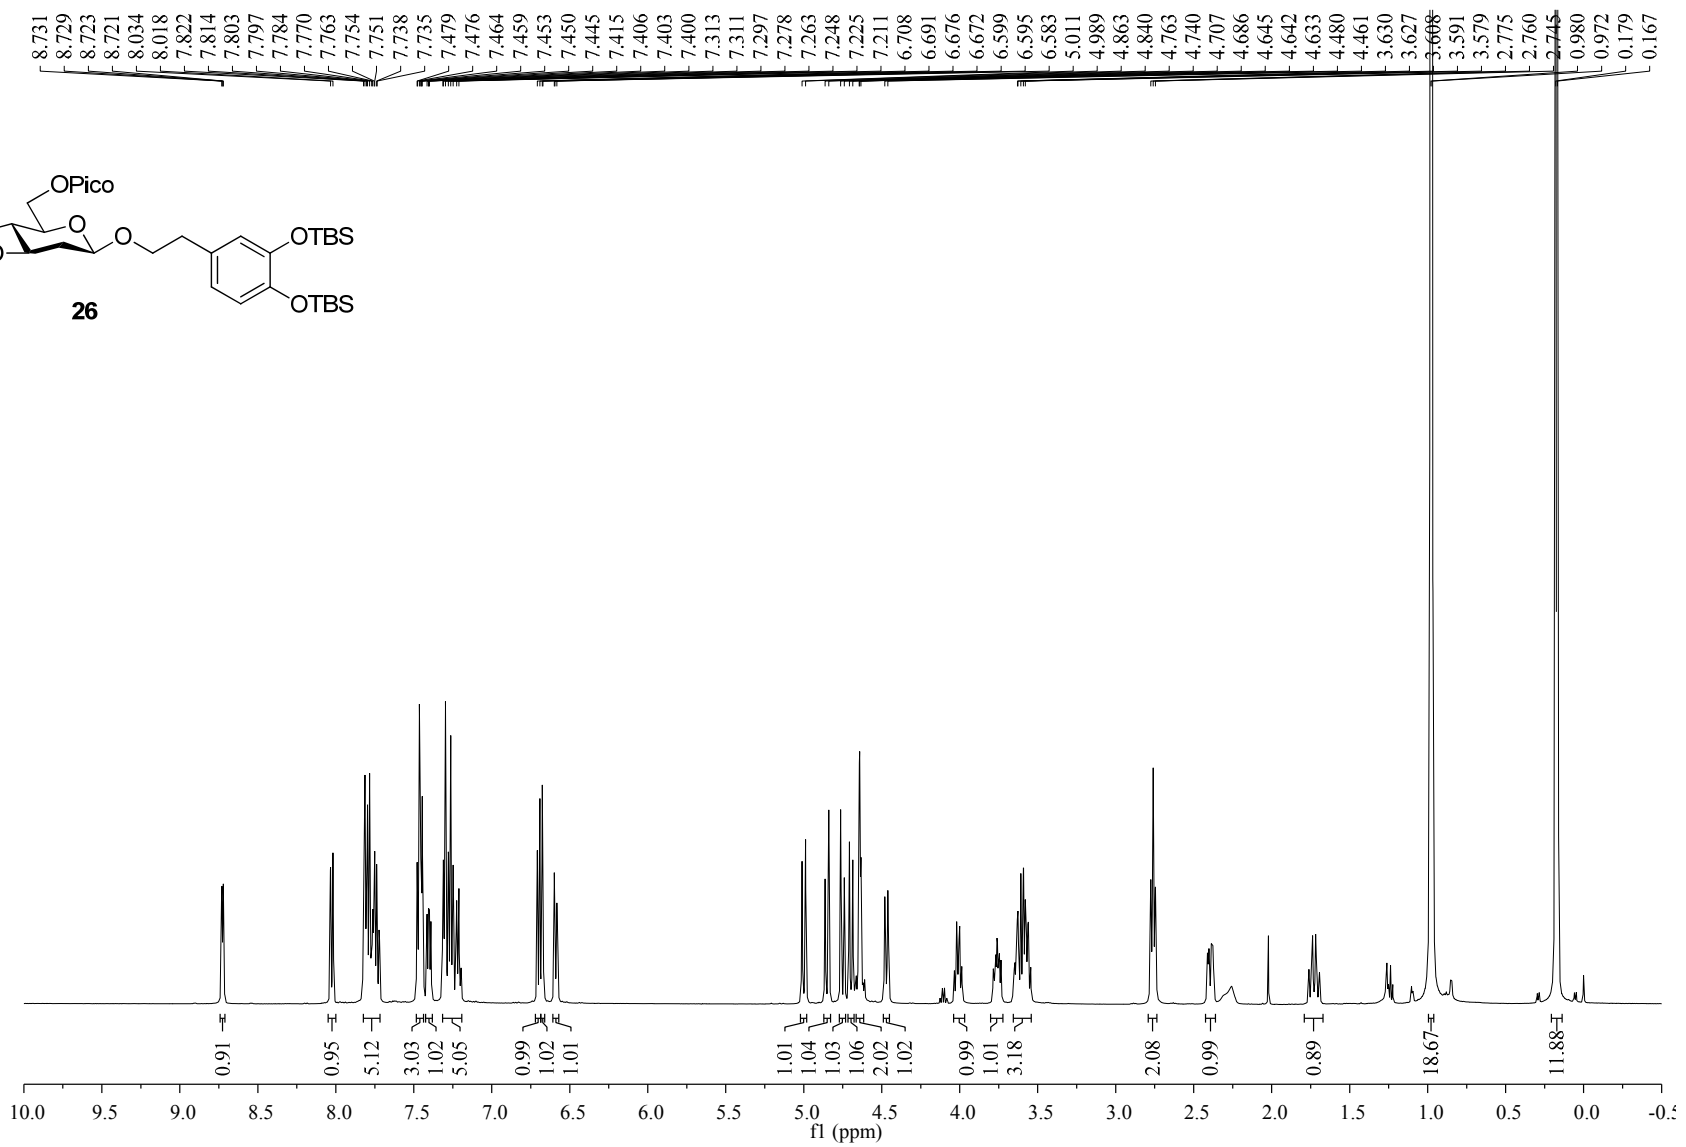

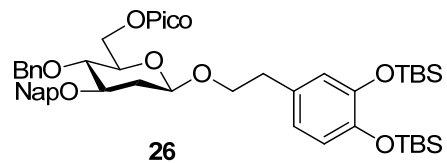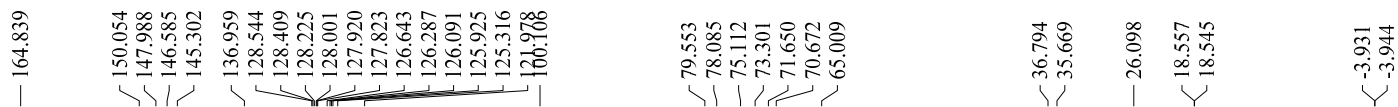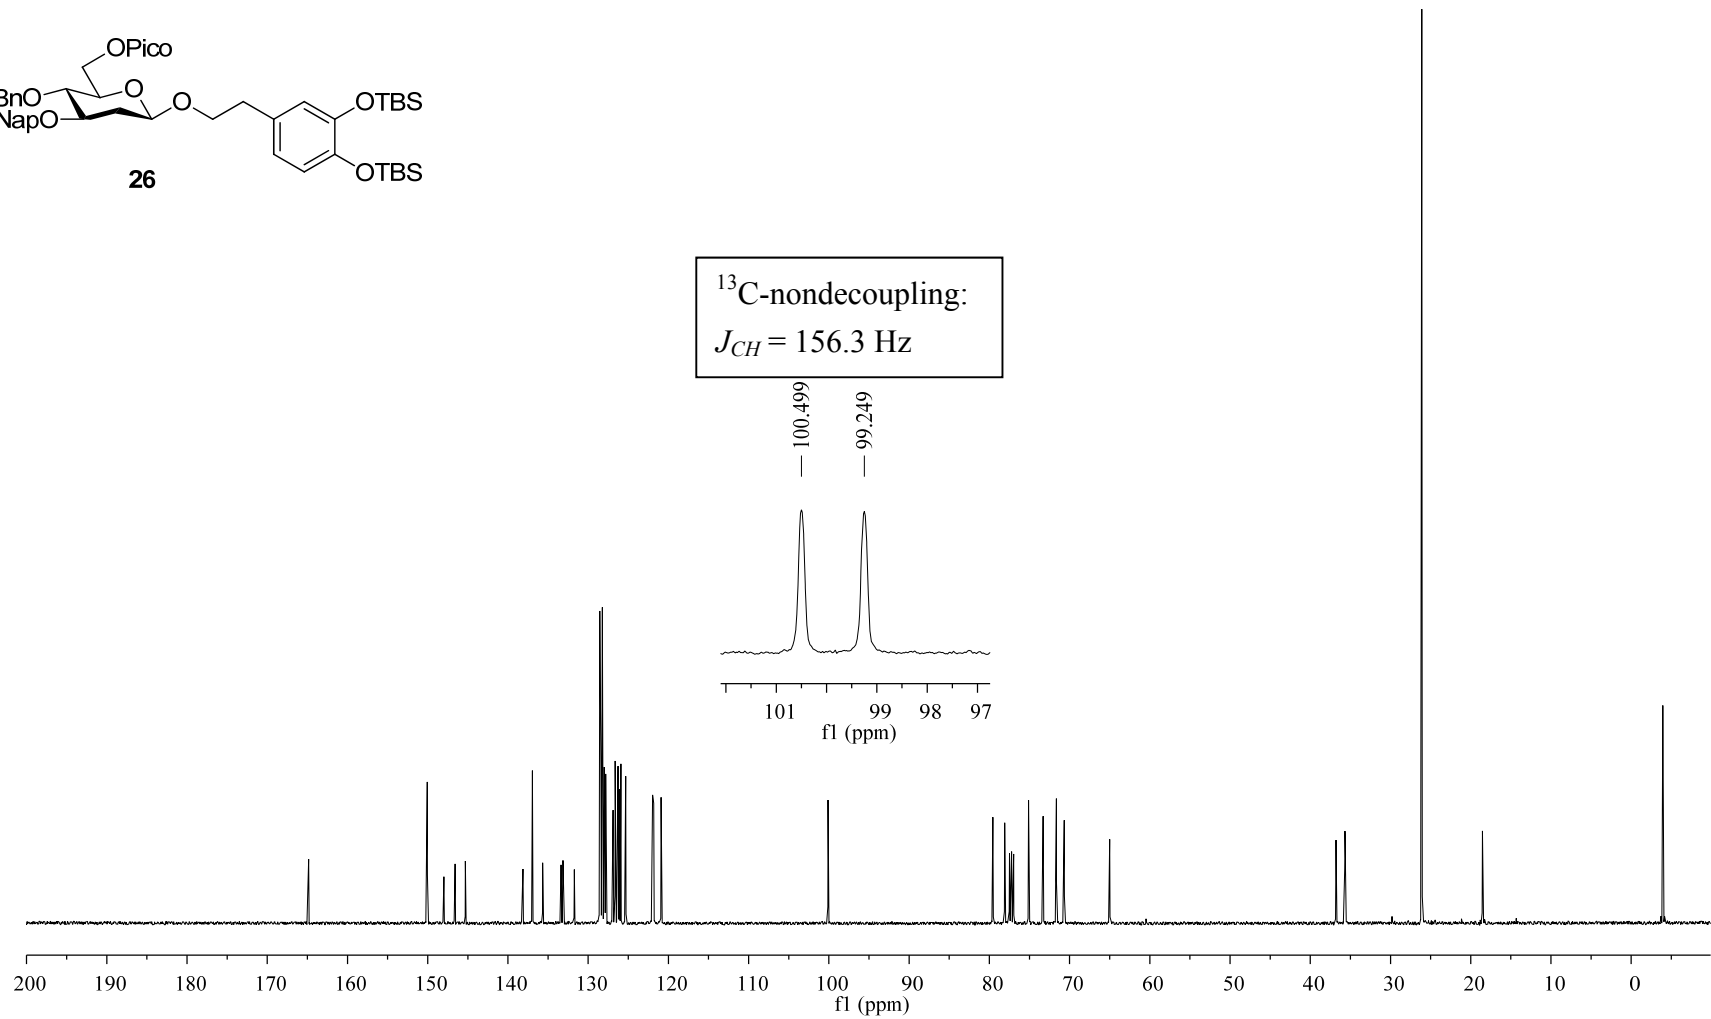



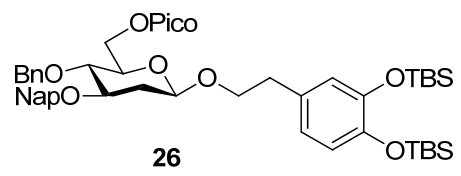

26

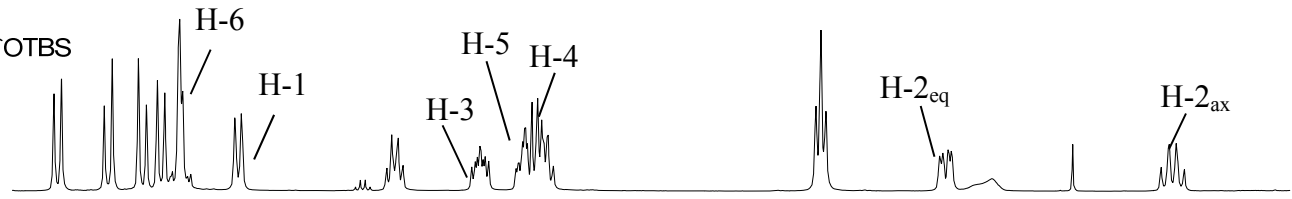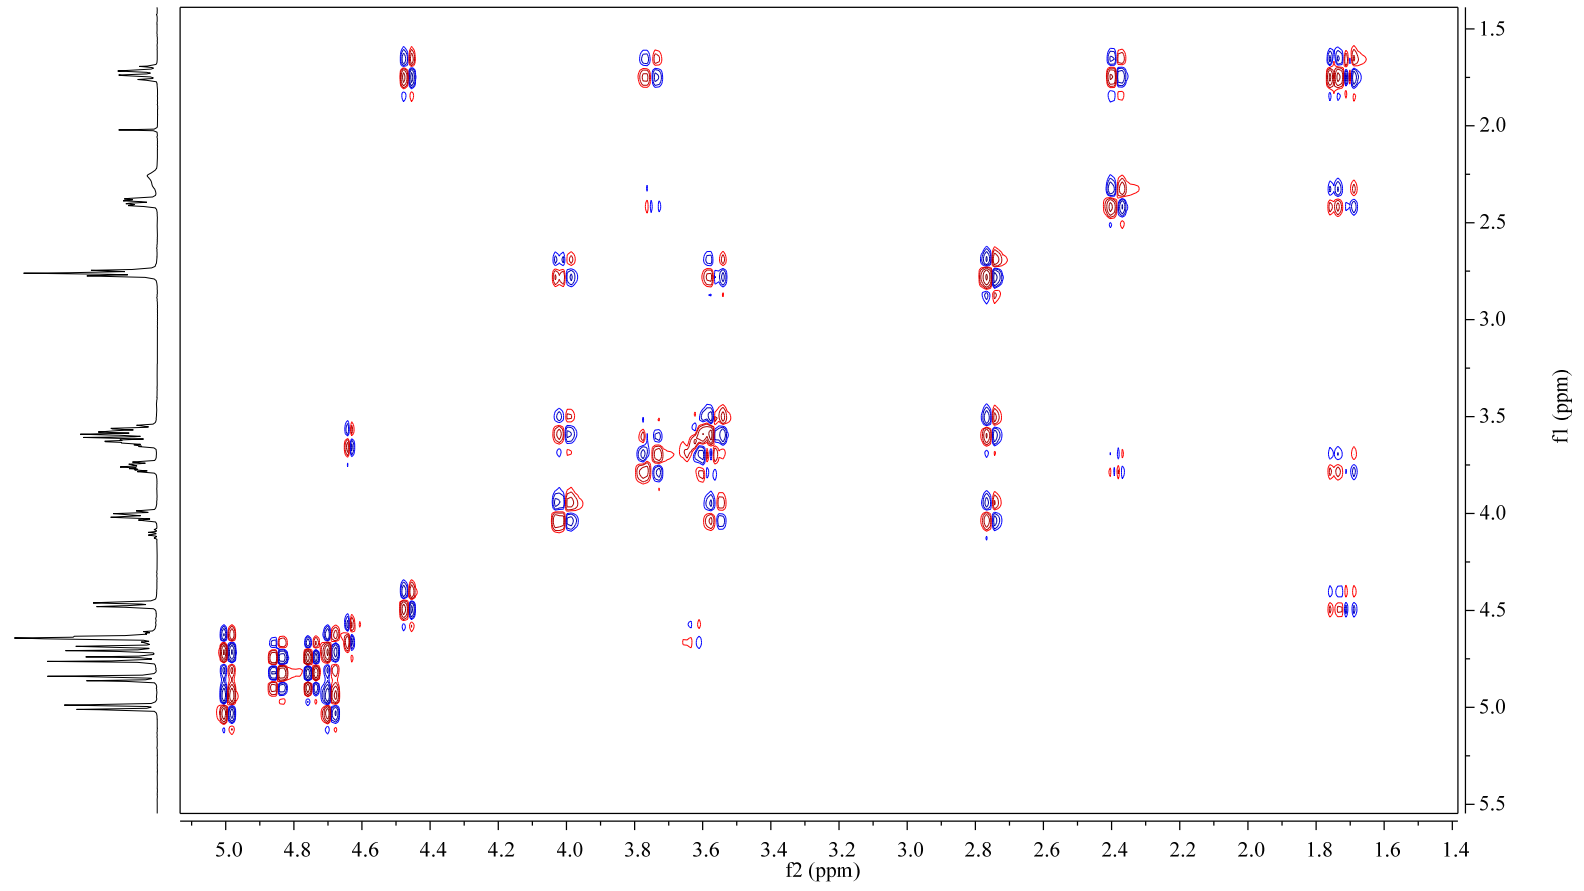

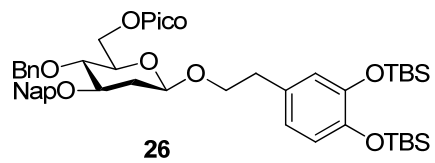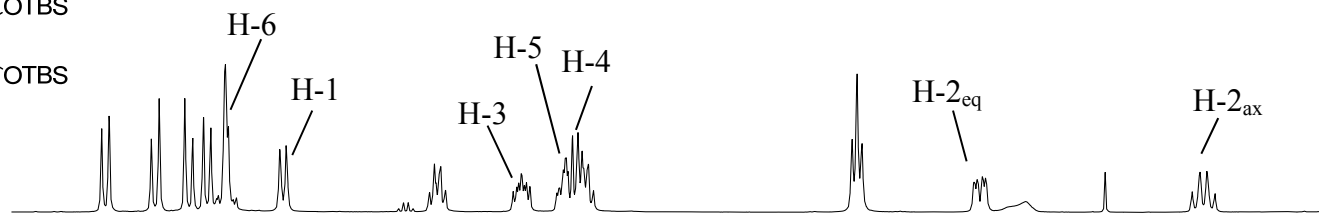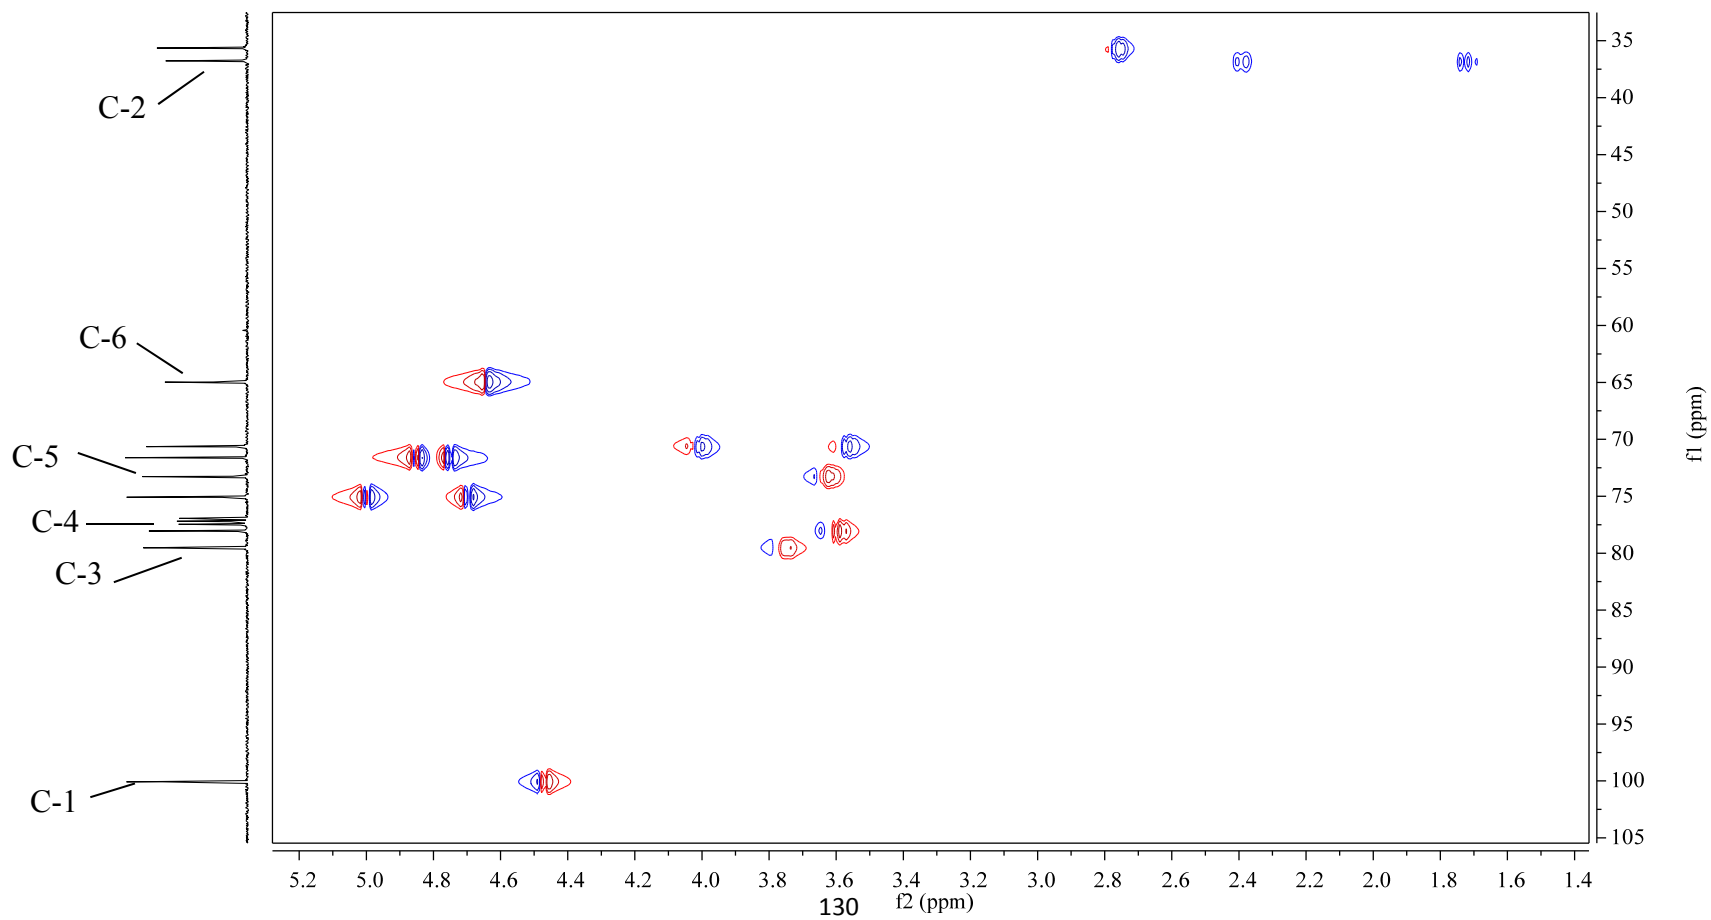

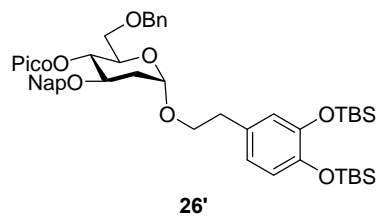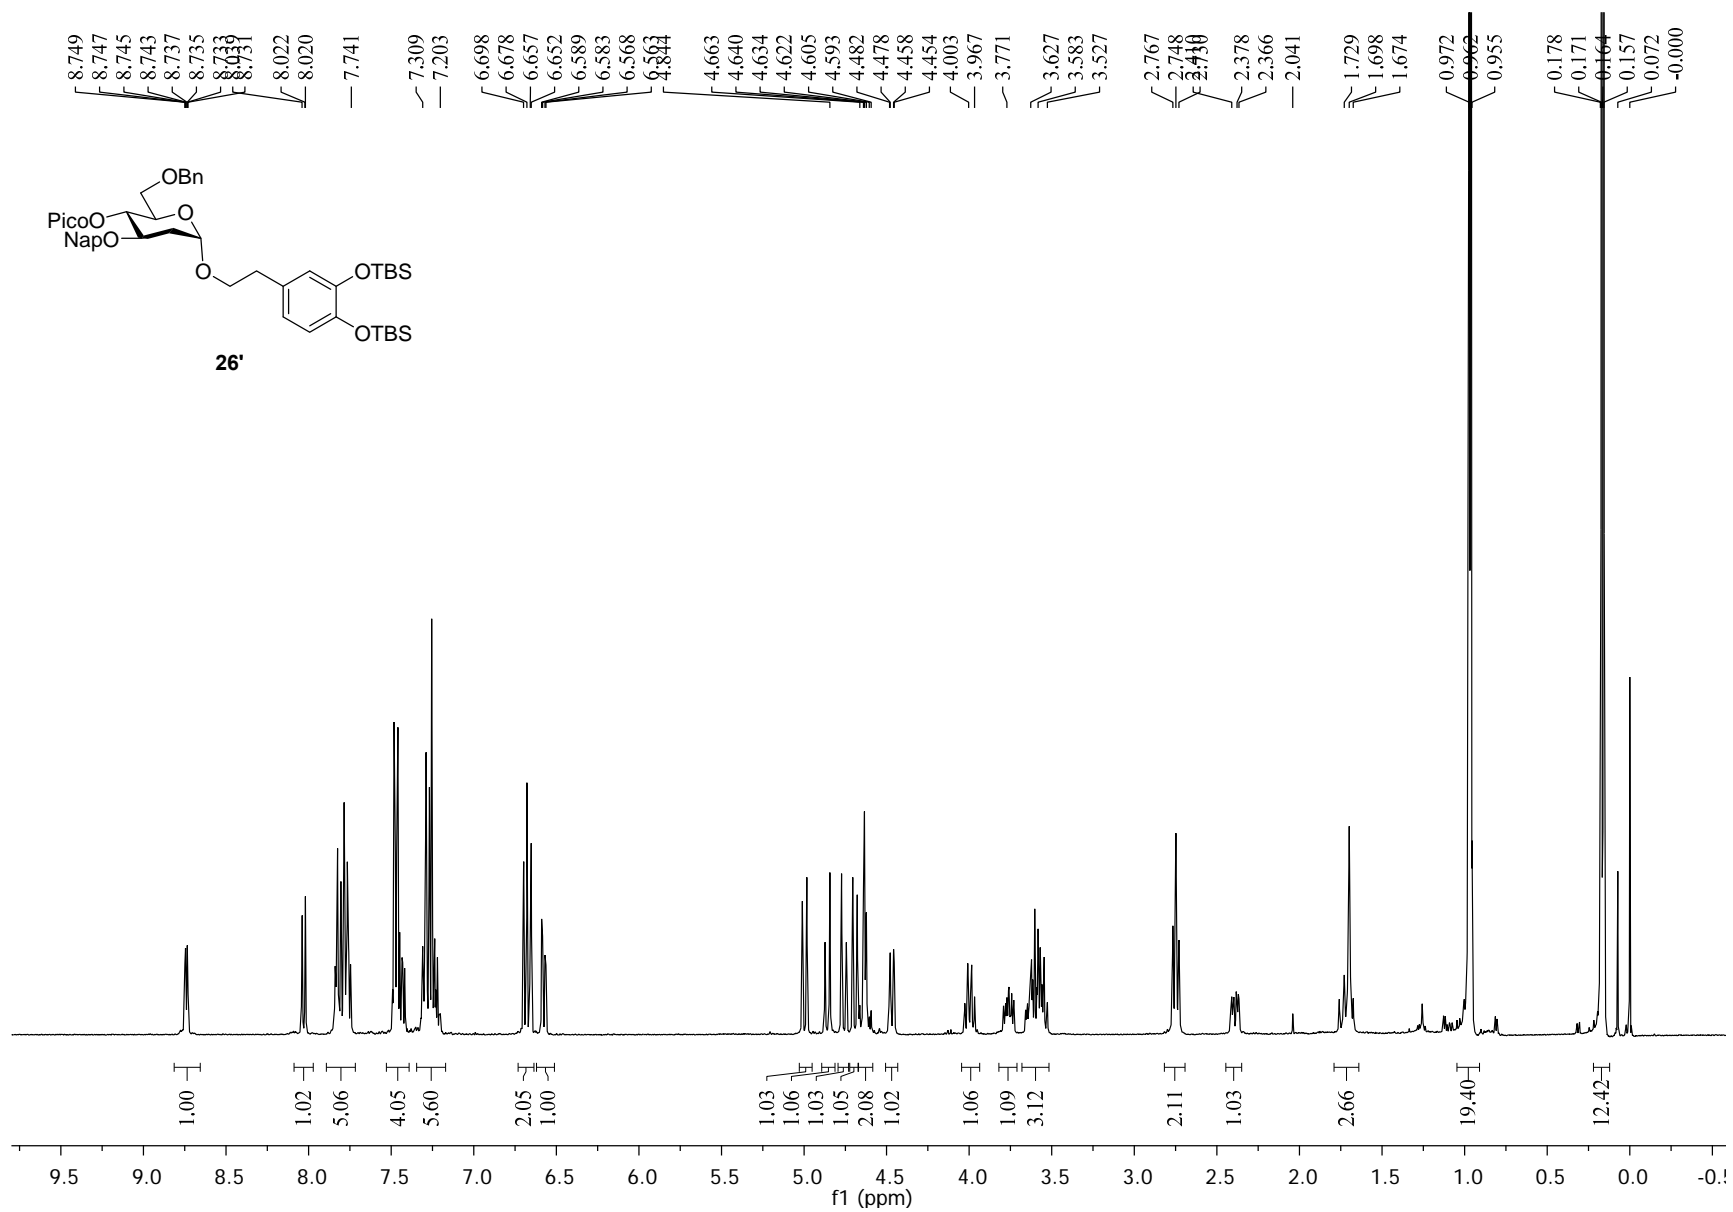

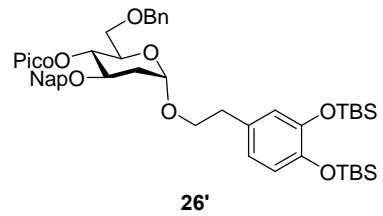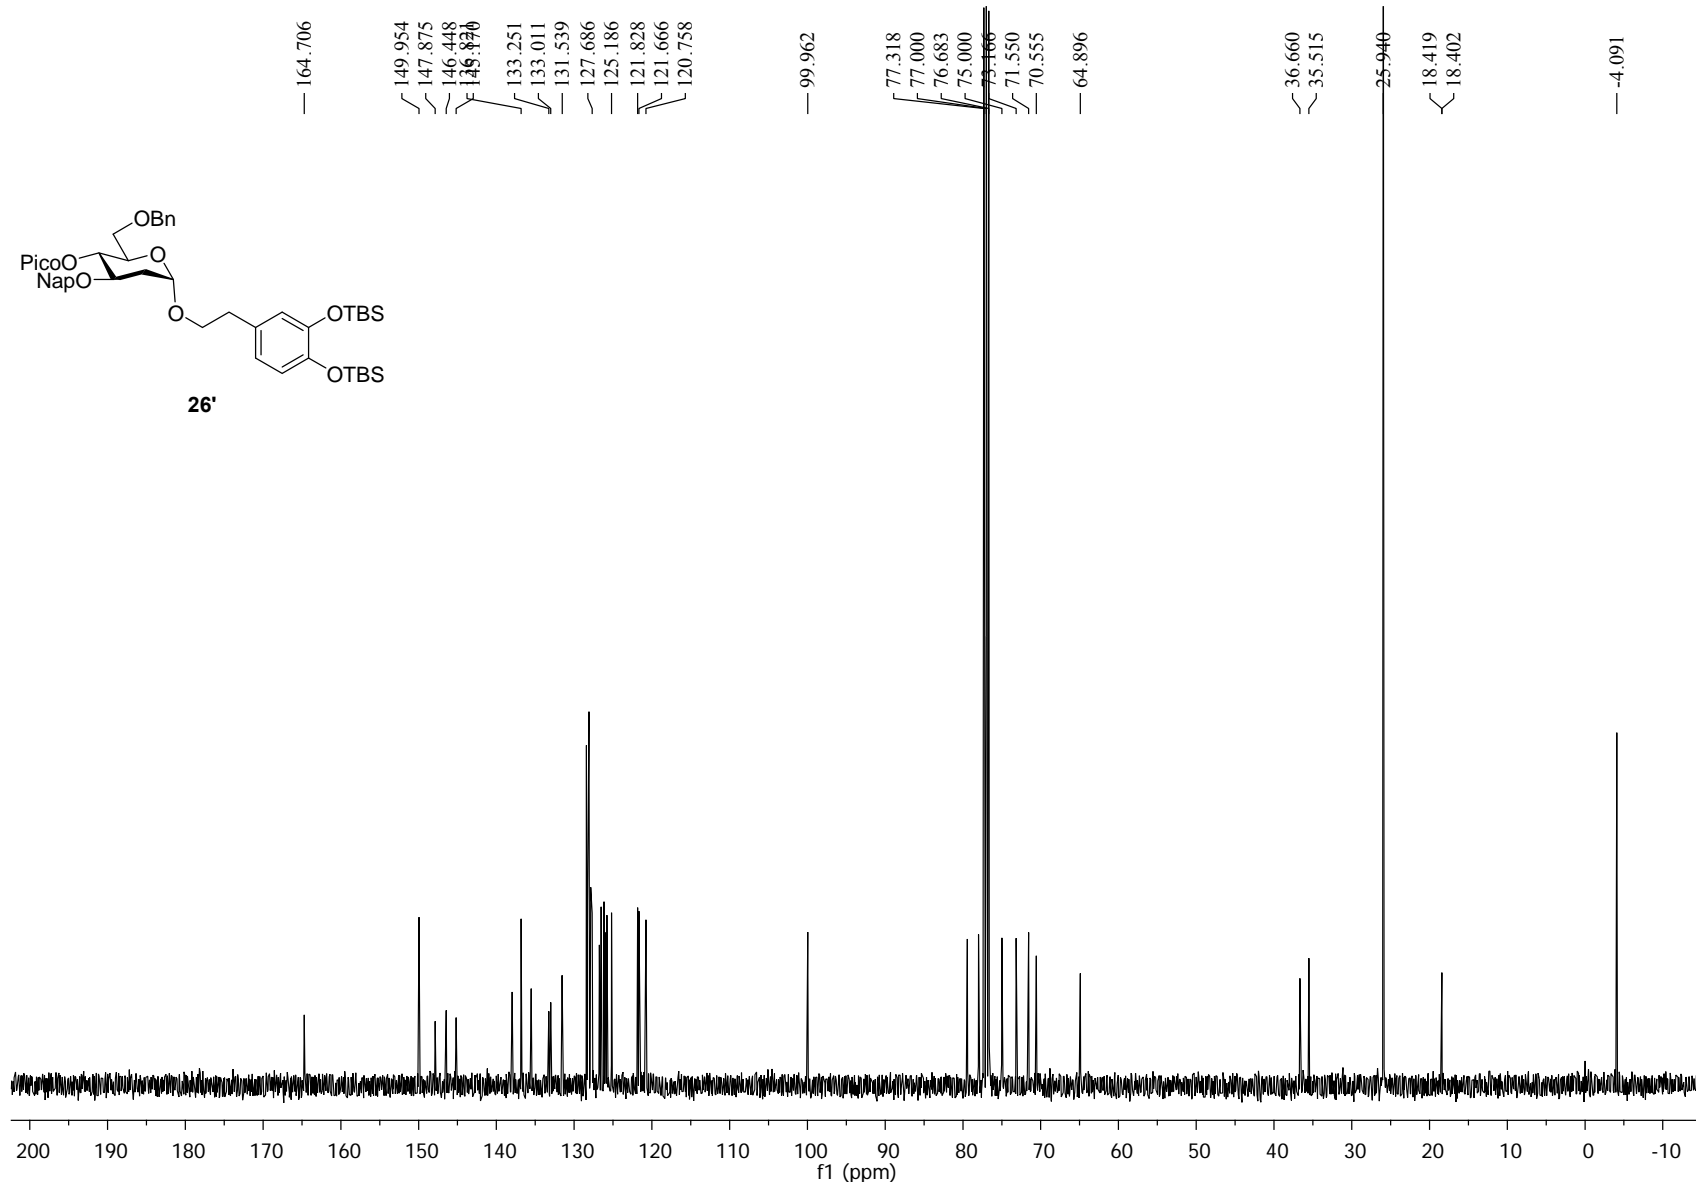

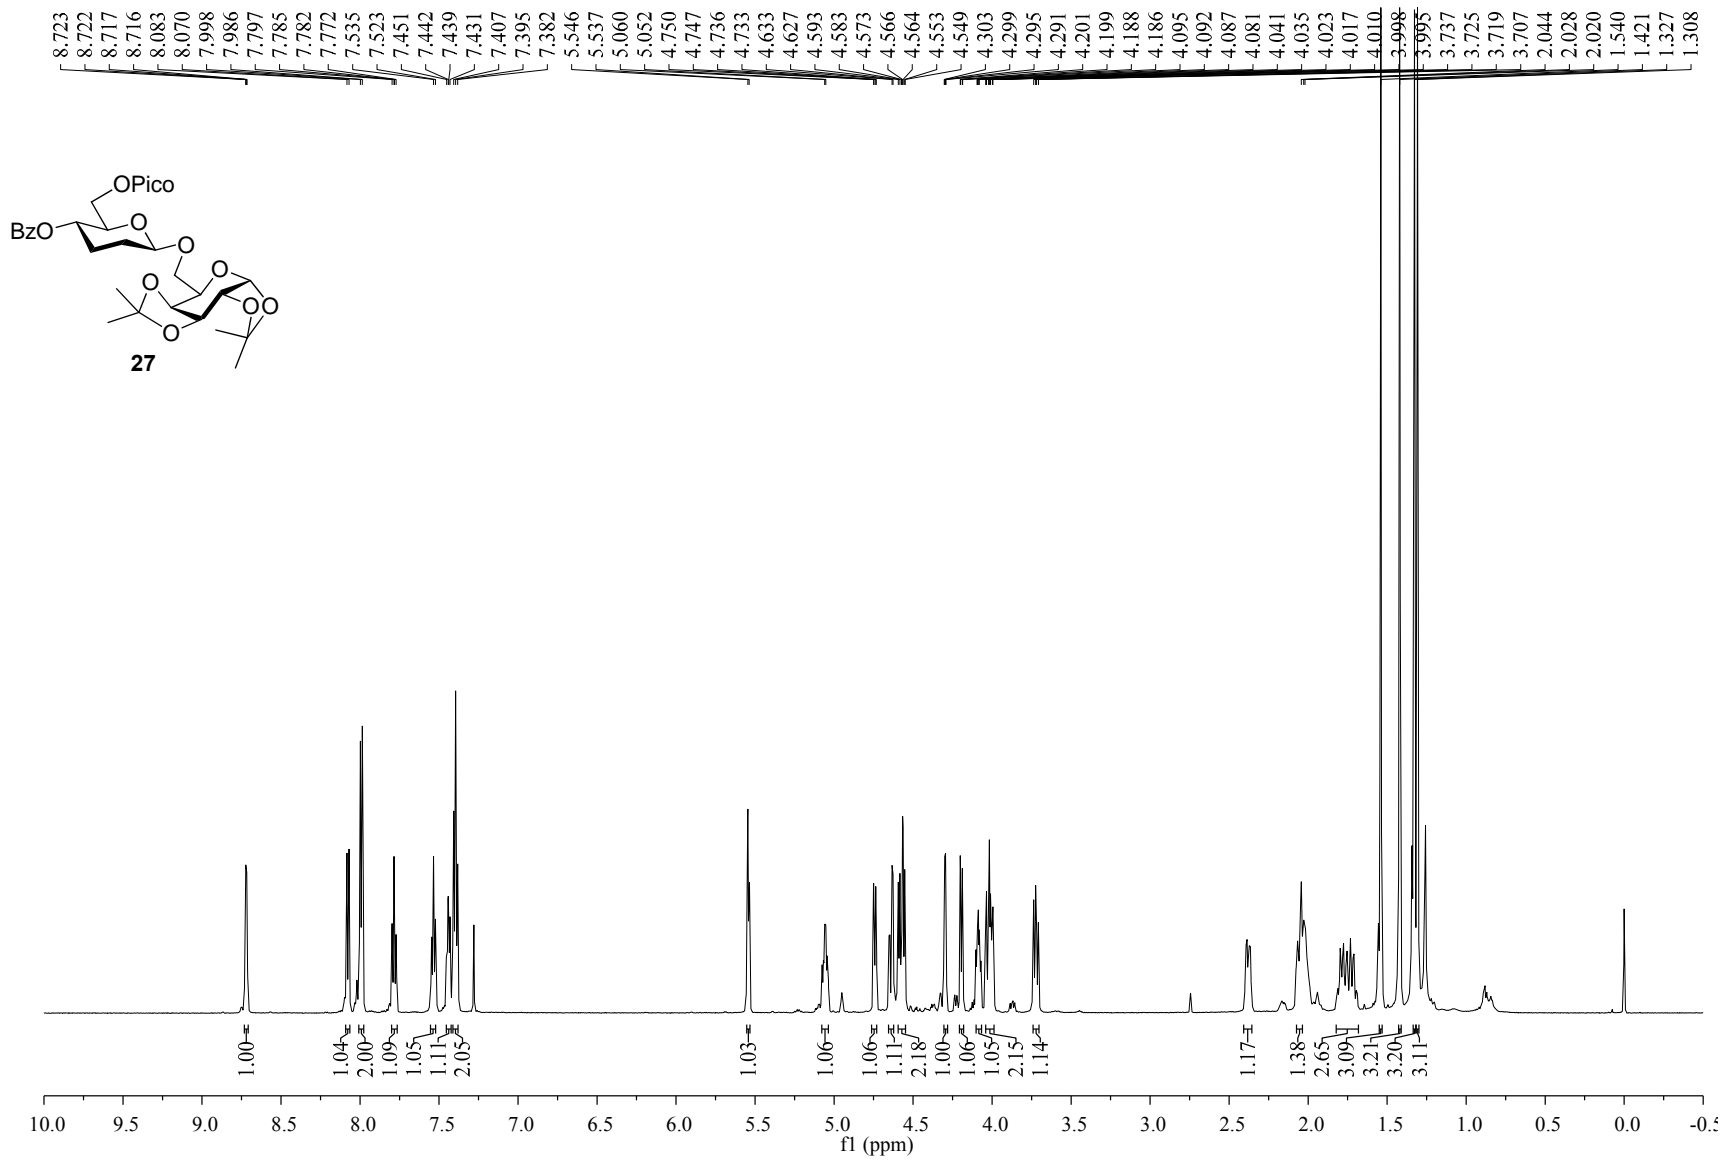

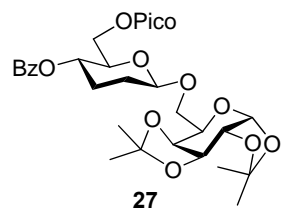

165.733  
164.866

150.038  
147.904

137.080  
133.327  
129.963  
129.812  
128.538  
126.998  
125.484

109.479  
108.822  
102.128  
96.473

74.863  
71.553  
70.851  
70.587  
68.950  
68.720  
68.055  
65.368

29.447  
26.841  
26.236  
26.128  
25.142  
24.558

<sup>13</sup>C-nondecoupling:  
 $J_{CH'} = 155.0$  Hz  
 $J_{CH} = 178.7$  Hz

102.440  
101.407  
96.858  
95.667

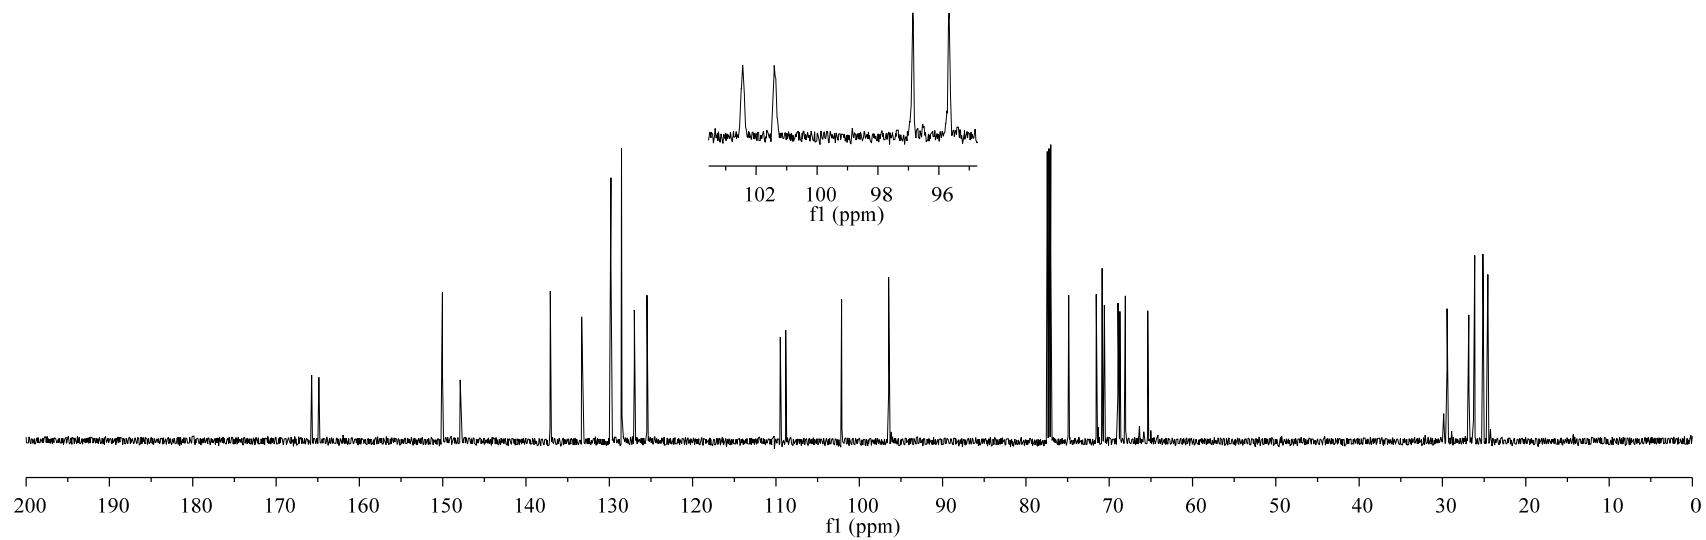

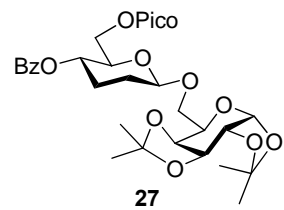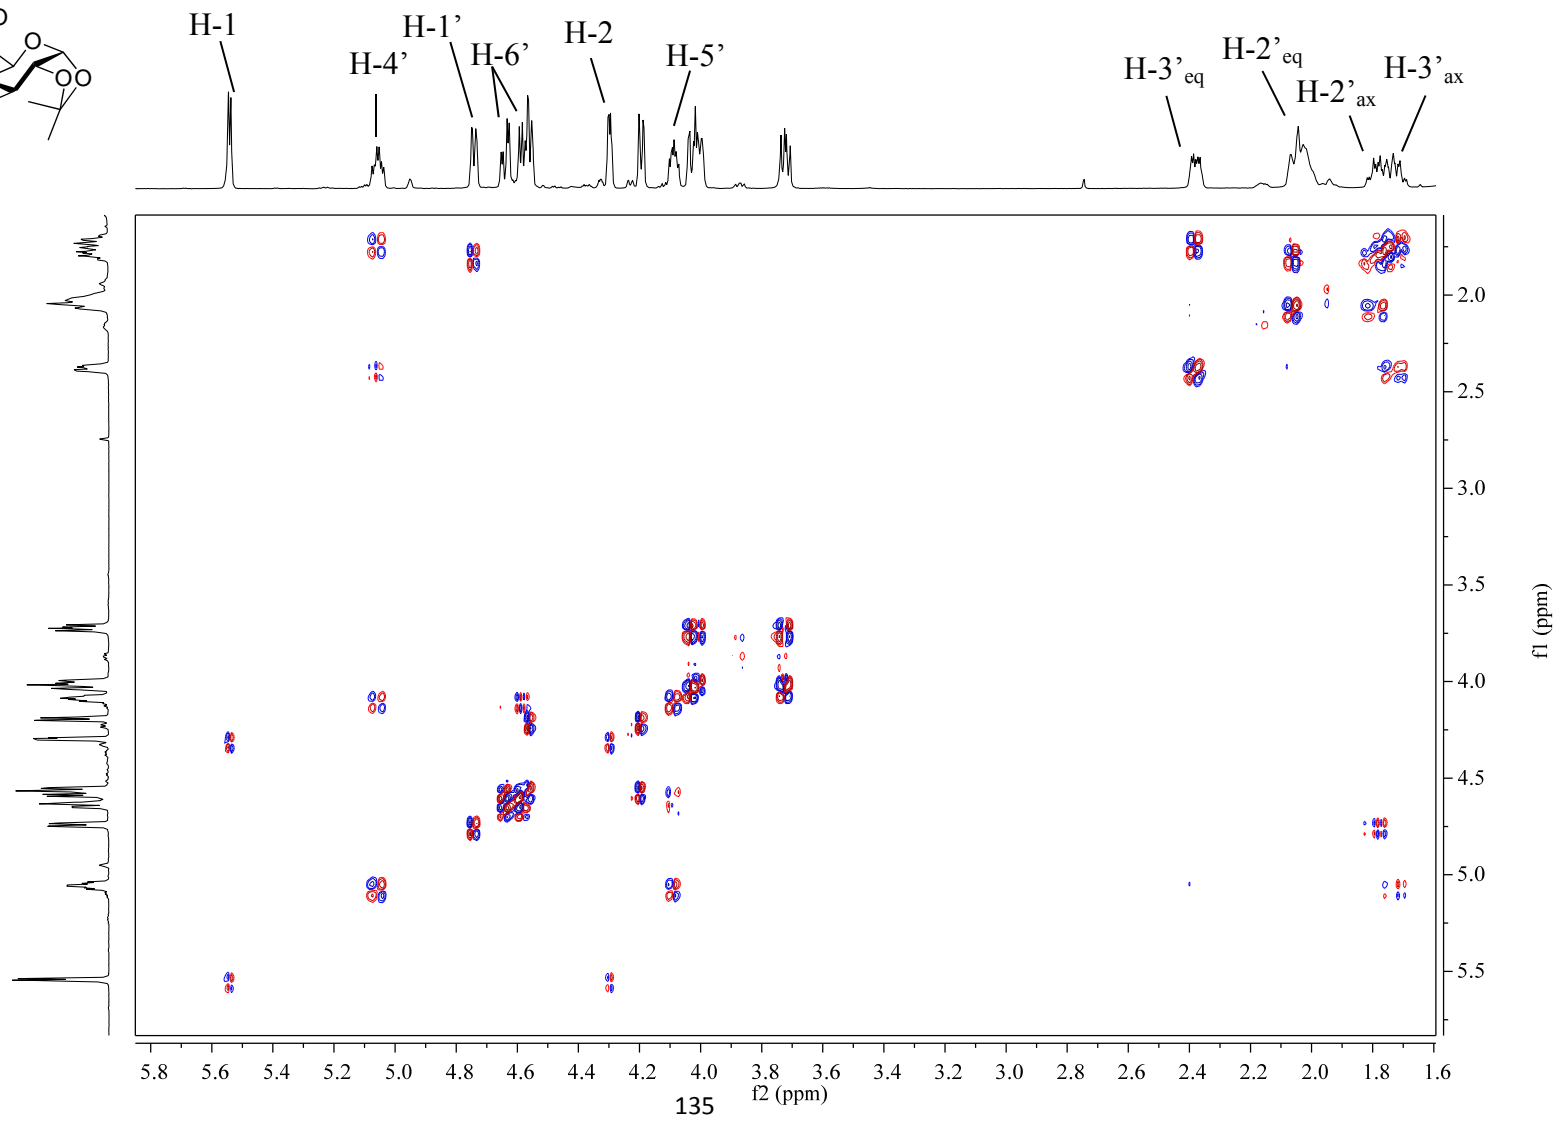

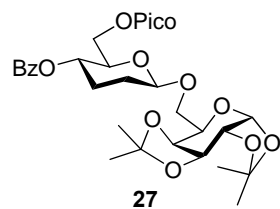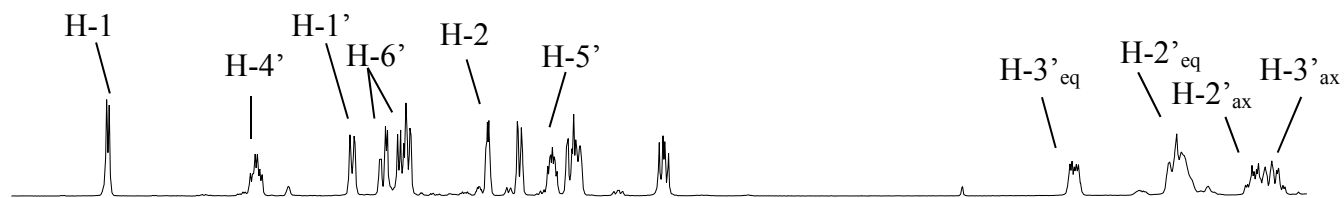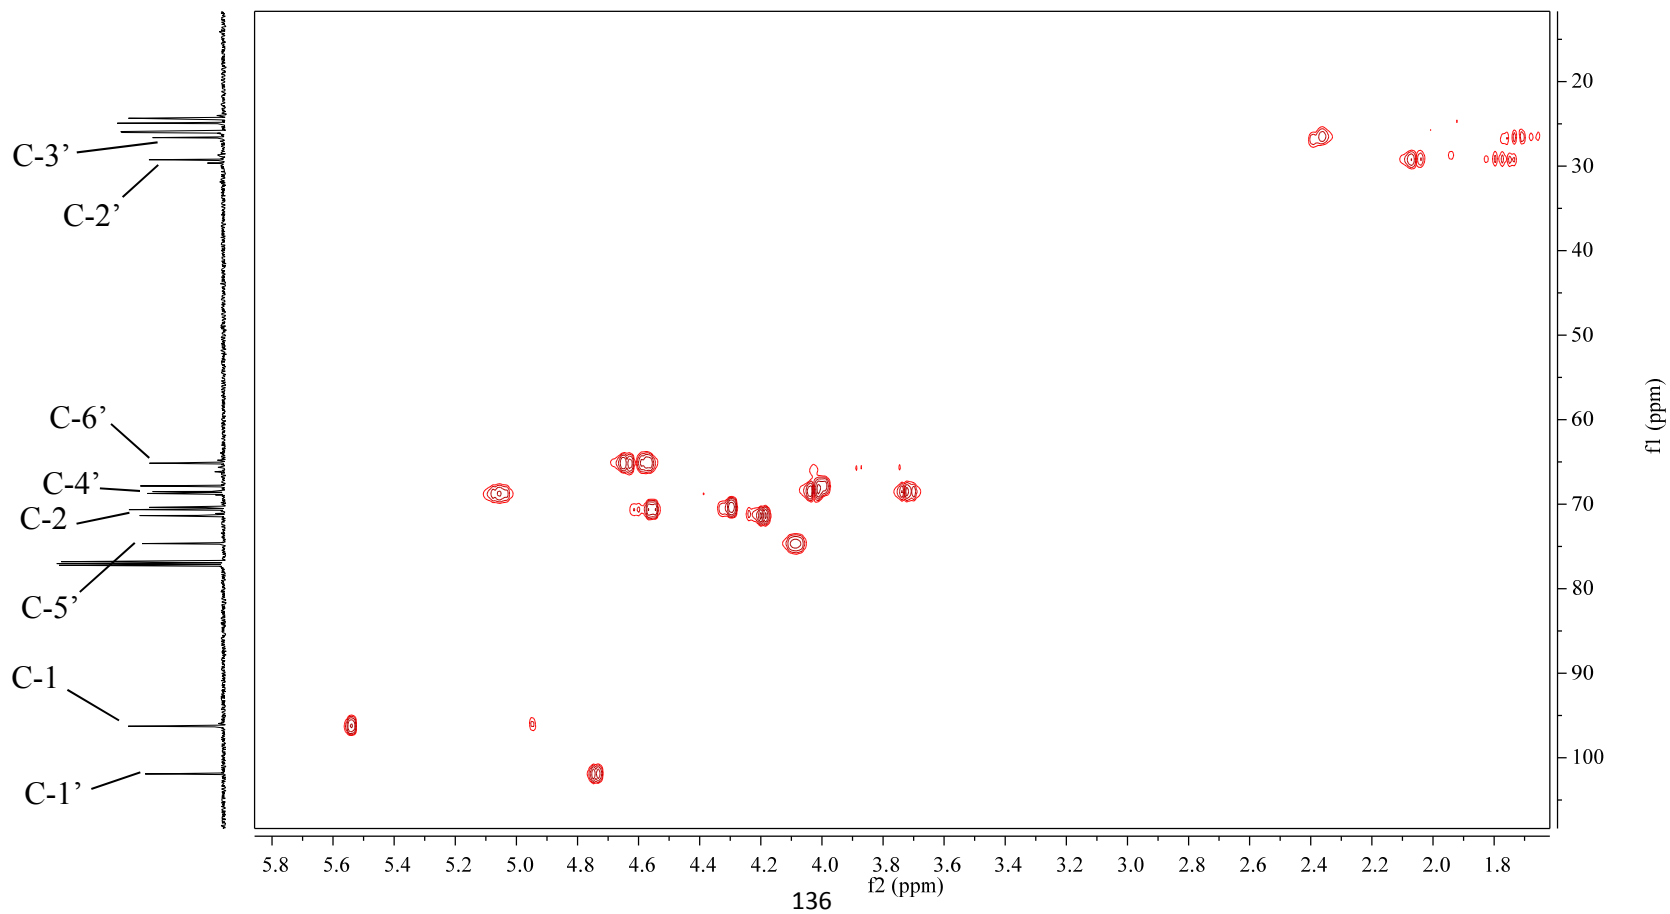



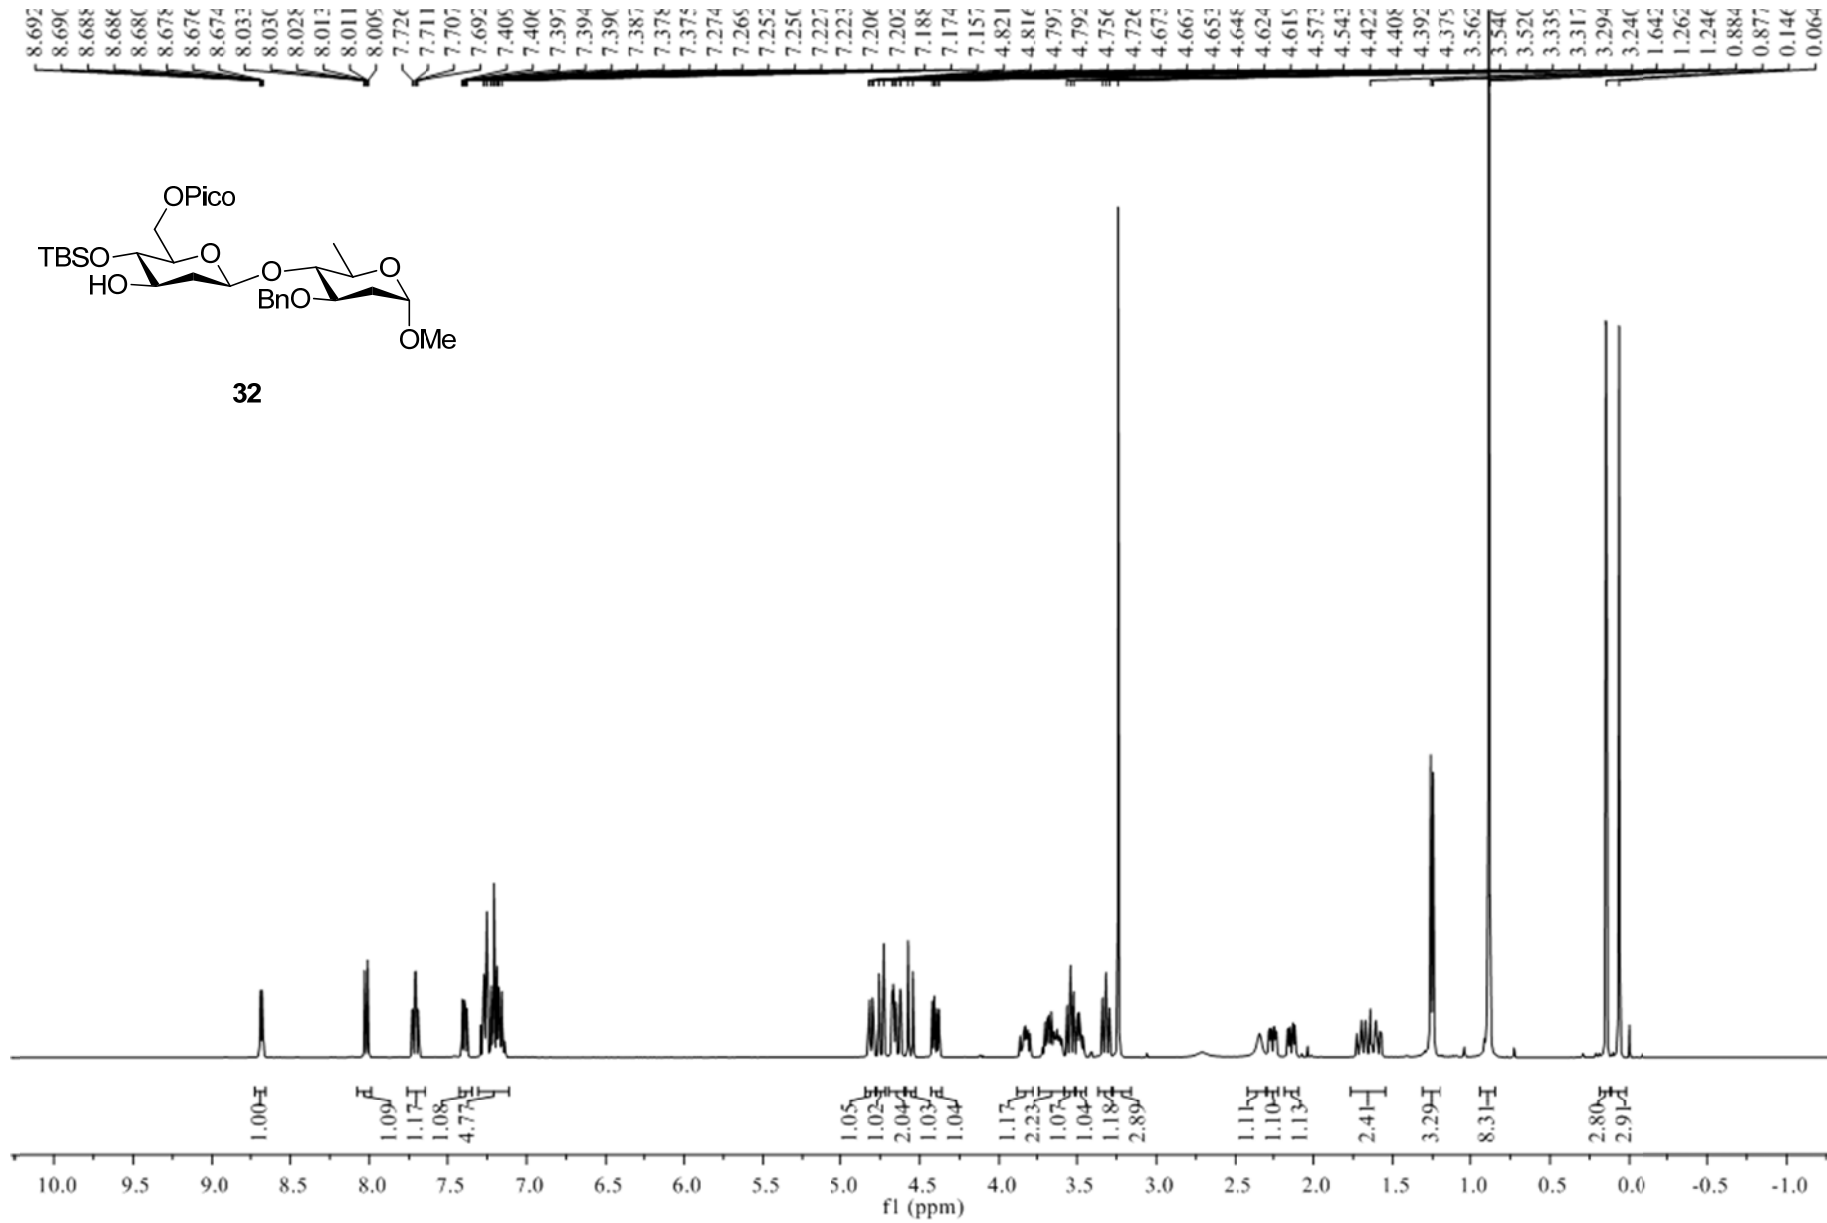

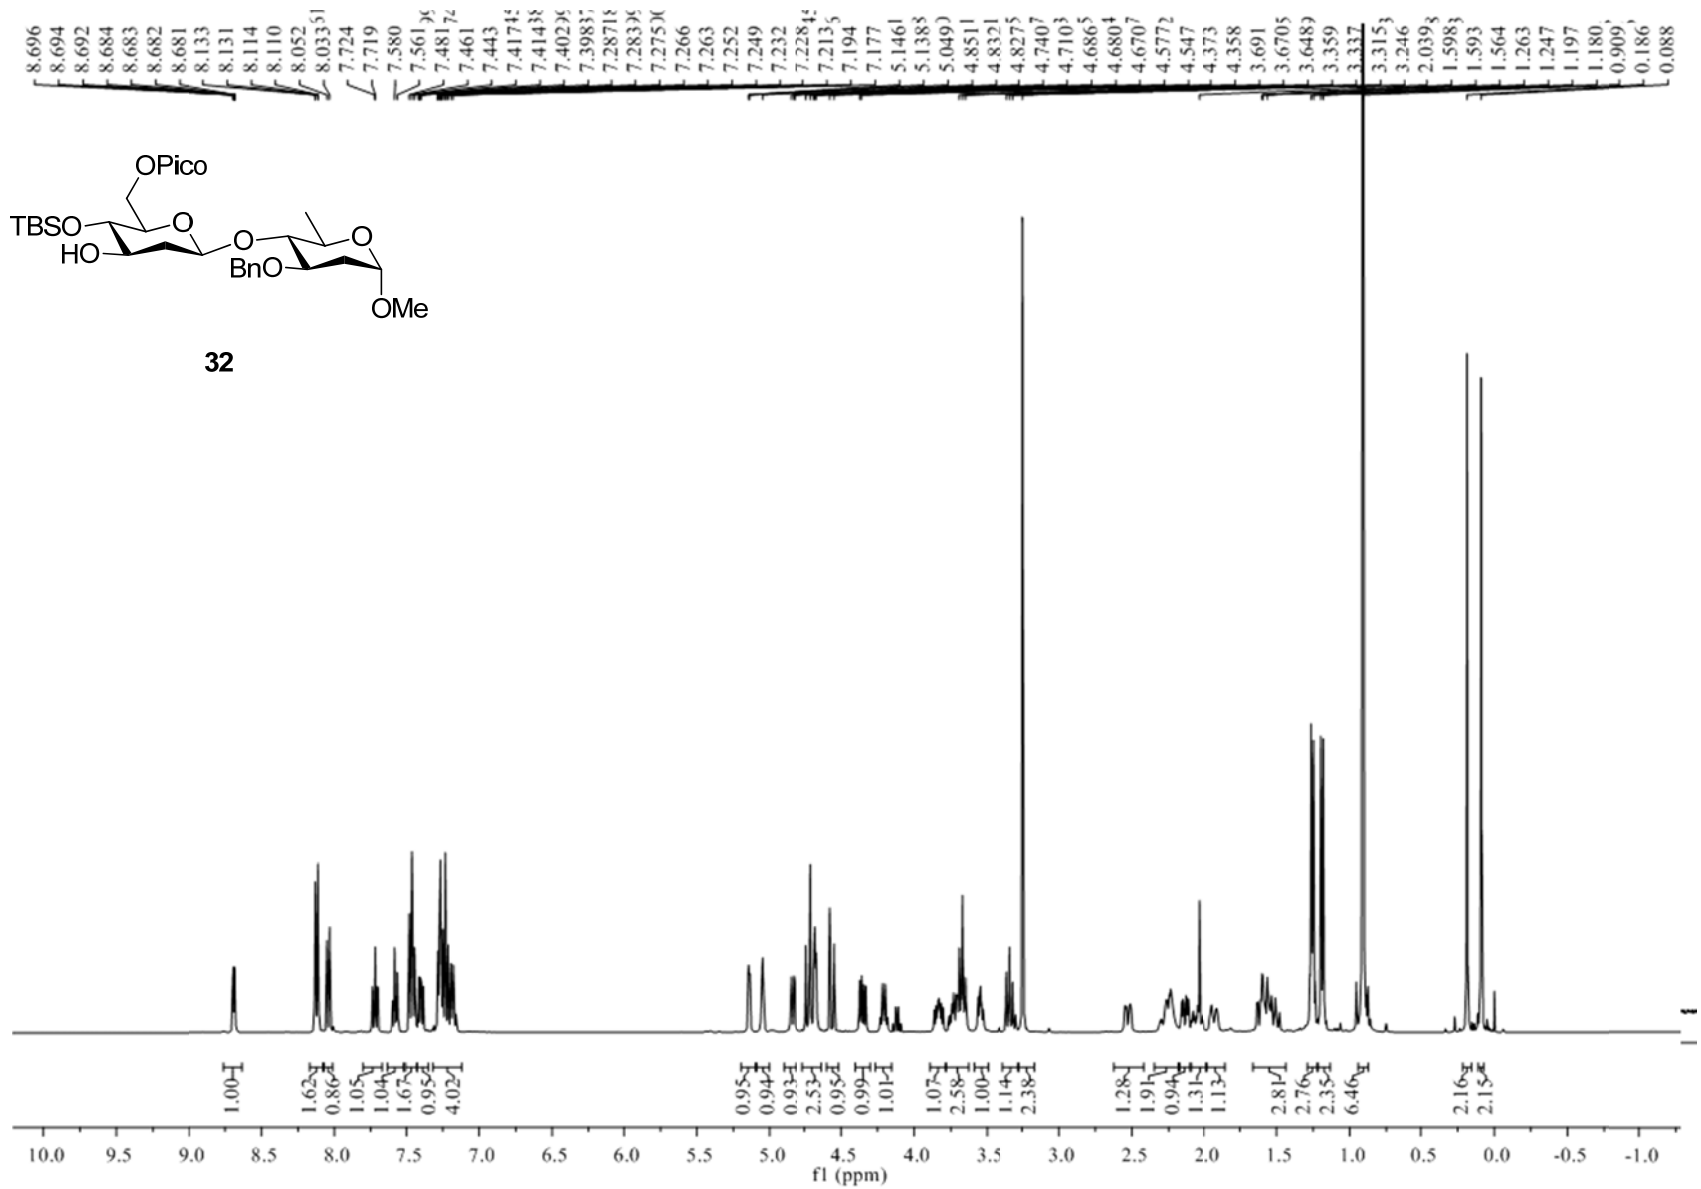

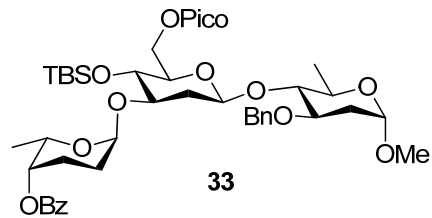

166.06  
164.71

149.72  
147.82  
139.01  
136.68  
132.95  
130.25  
129.61  
128.34  
128.07  
127.35  
127.18  
126.62  
125.08

99.91  
97.97

91.31  
82.91  
77.32  
77.00  
76.68  
74.98  
74.81  
73.23  
71.87  
70.92  
69.74  
55.98  
55.98

35.73  
34.68  
25.78  
23.83  
22.90  
18.16  
17.93  
17.12

-3.35  
-4.42

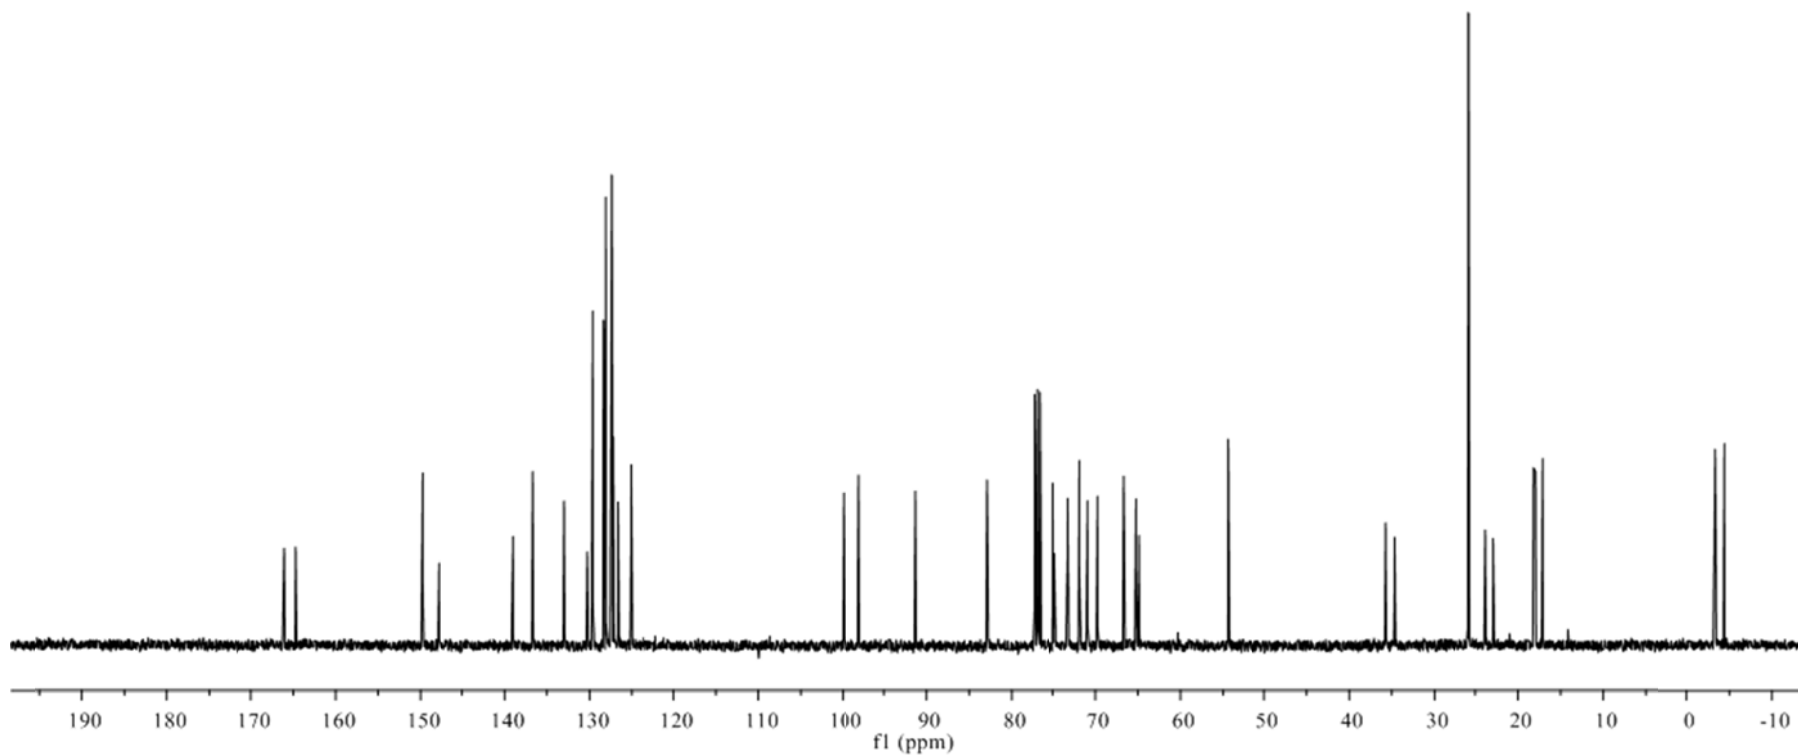

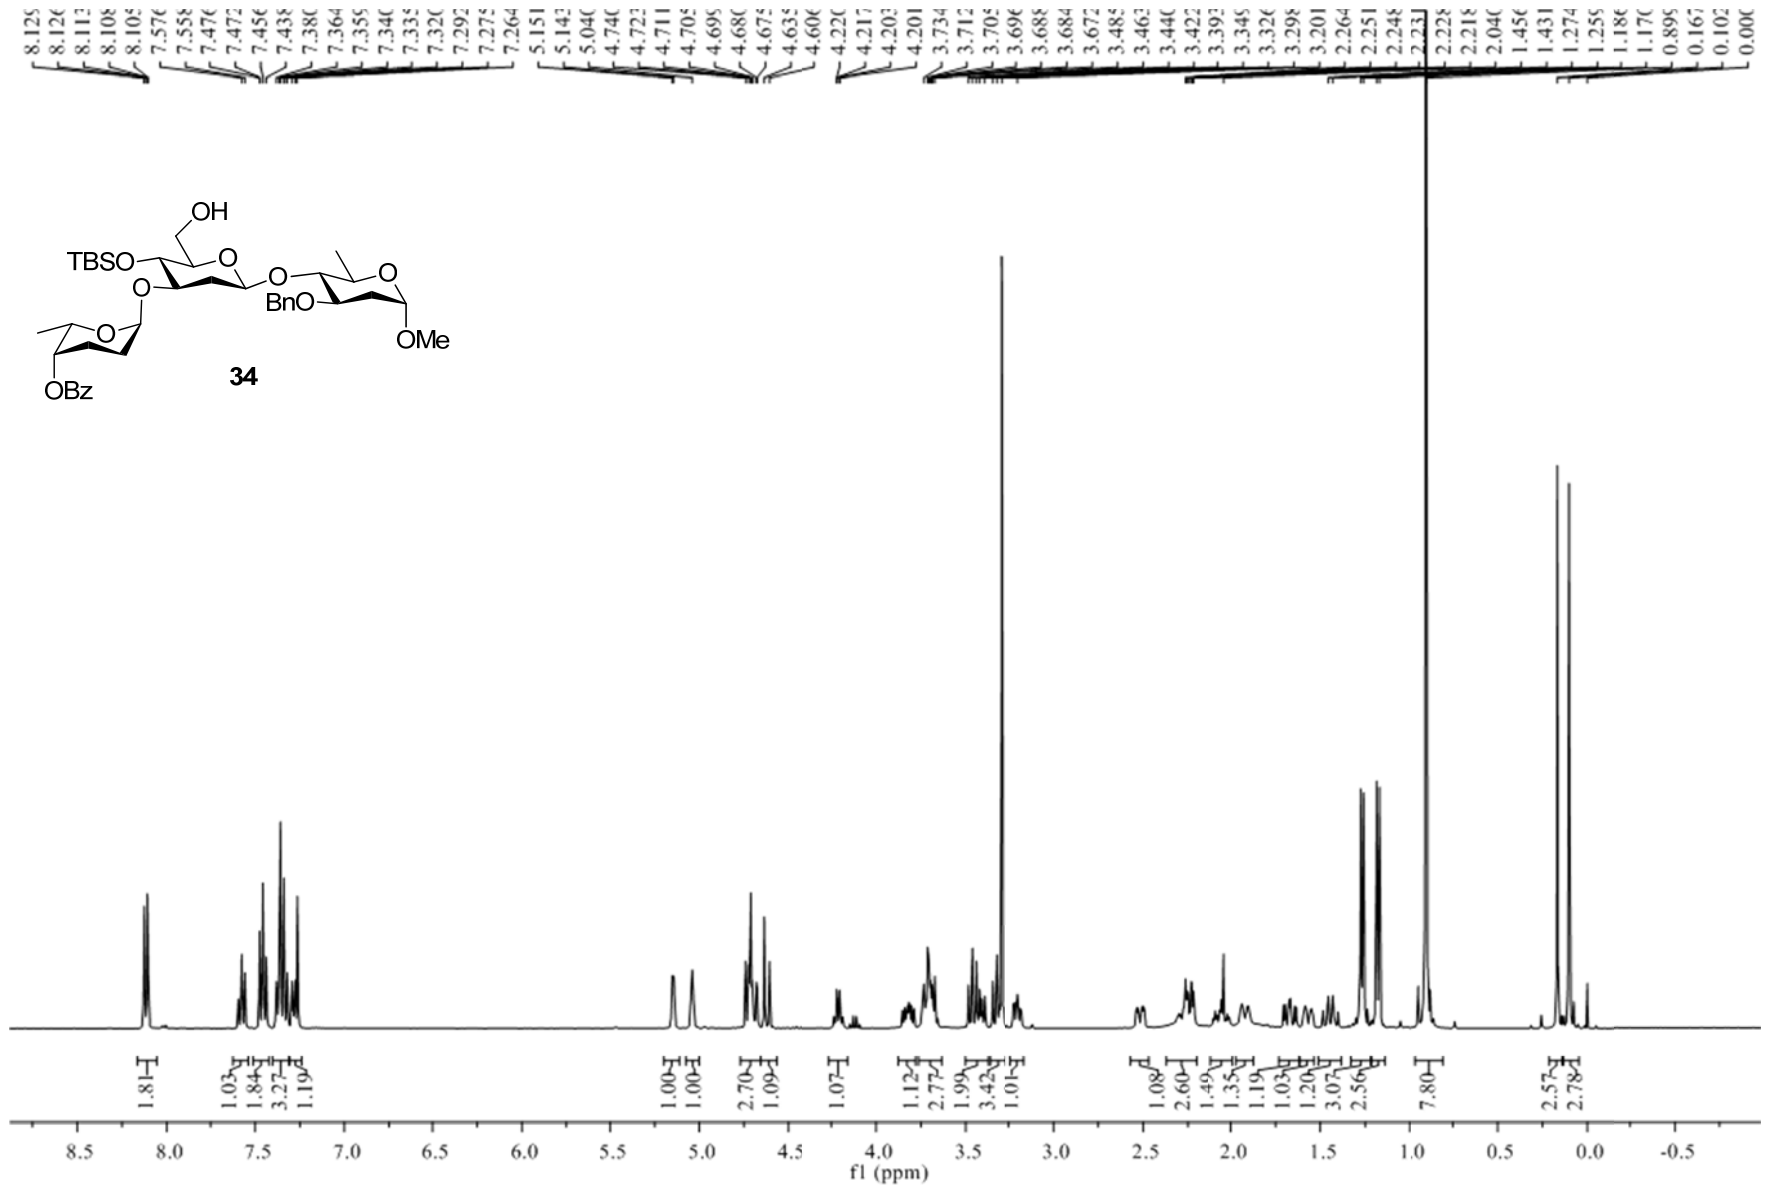

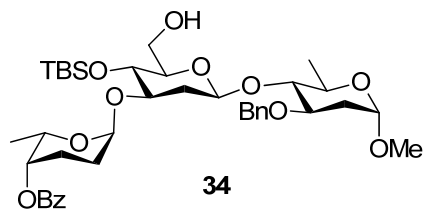

166.082

138.812  
133.002  
130.277  
129.644  
128.362  
128.262  
127.505  
127.444

100.106

98.120

91.349

83.680

77.317  
77.000  
76.683  
74.890  
72.188  
71.229  
69.789  
66.832  
54.513

35.904

34.808

25.803

23.879

22.903

18.037

17.938

17.149

-3.353

-4.324

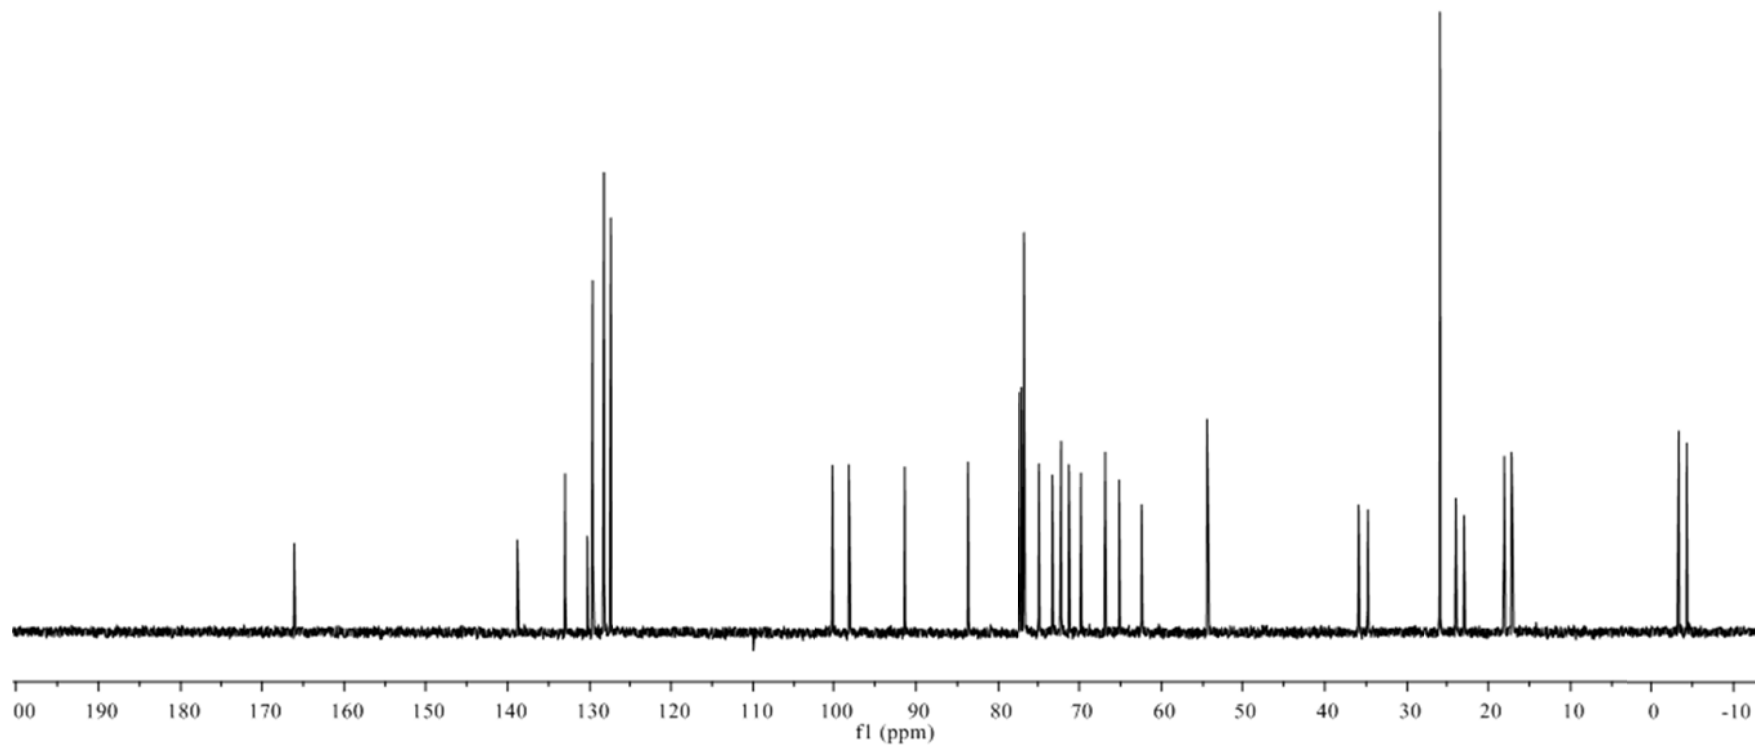

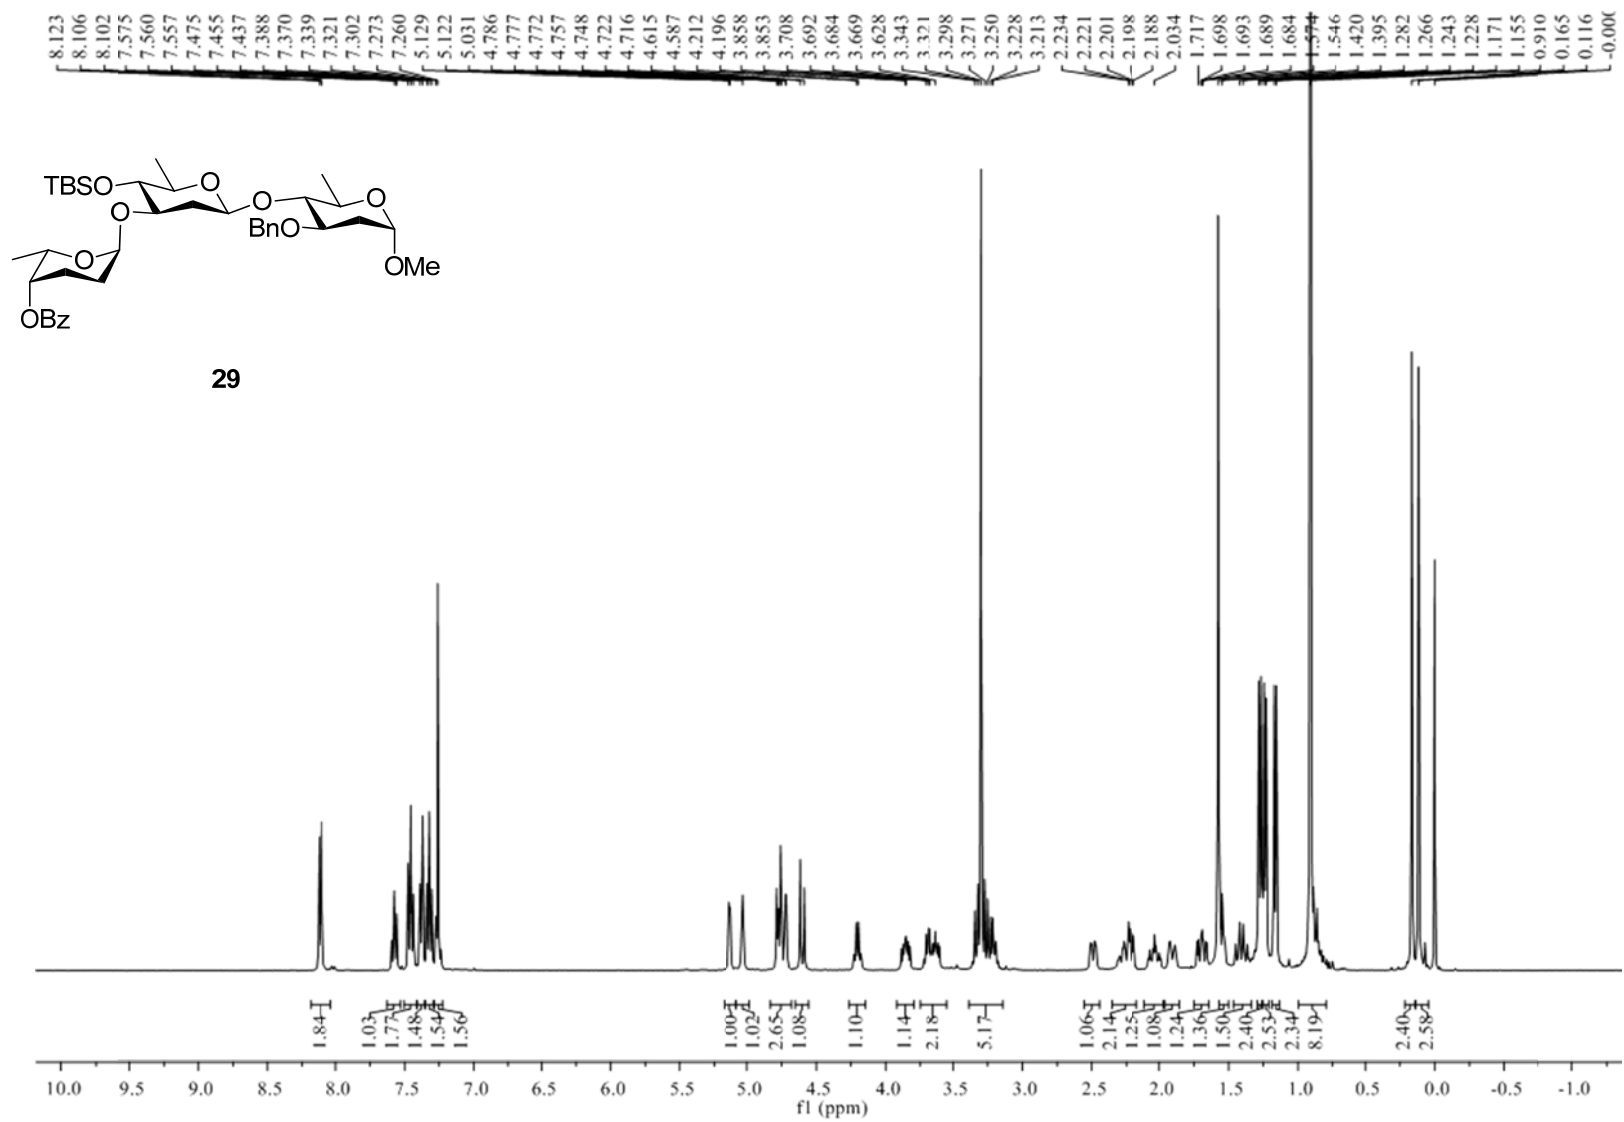

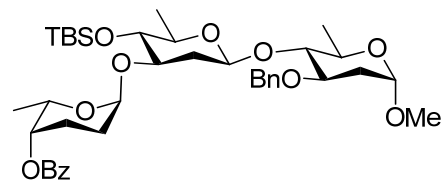

29

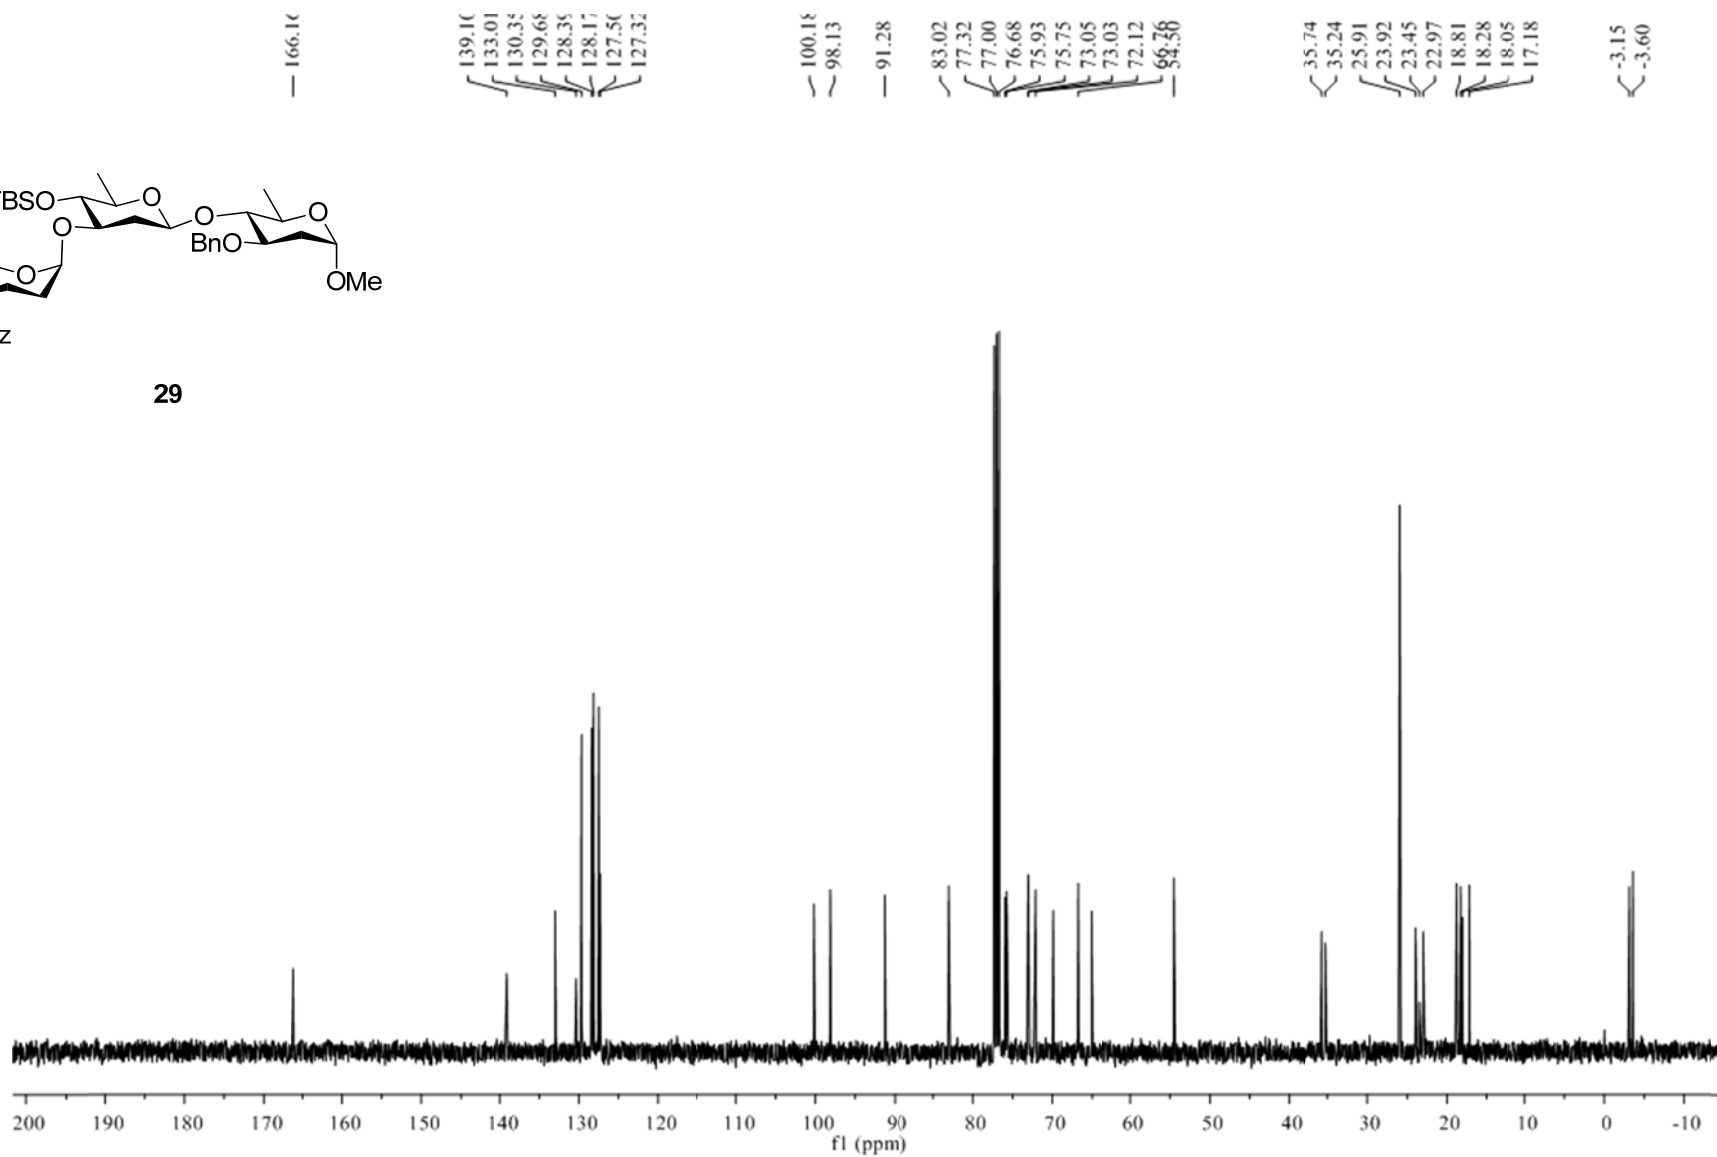

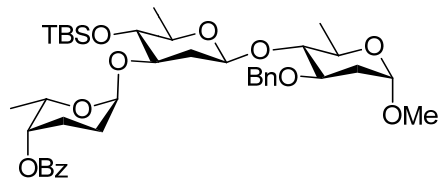

29

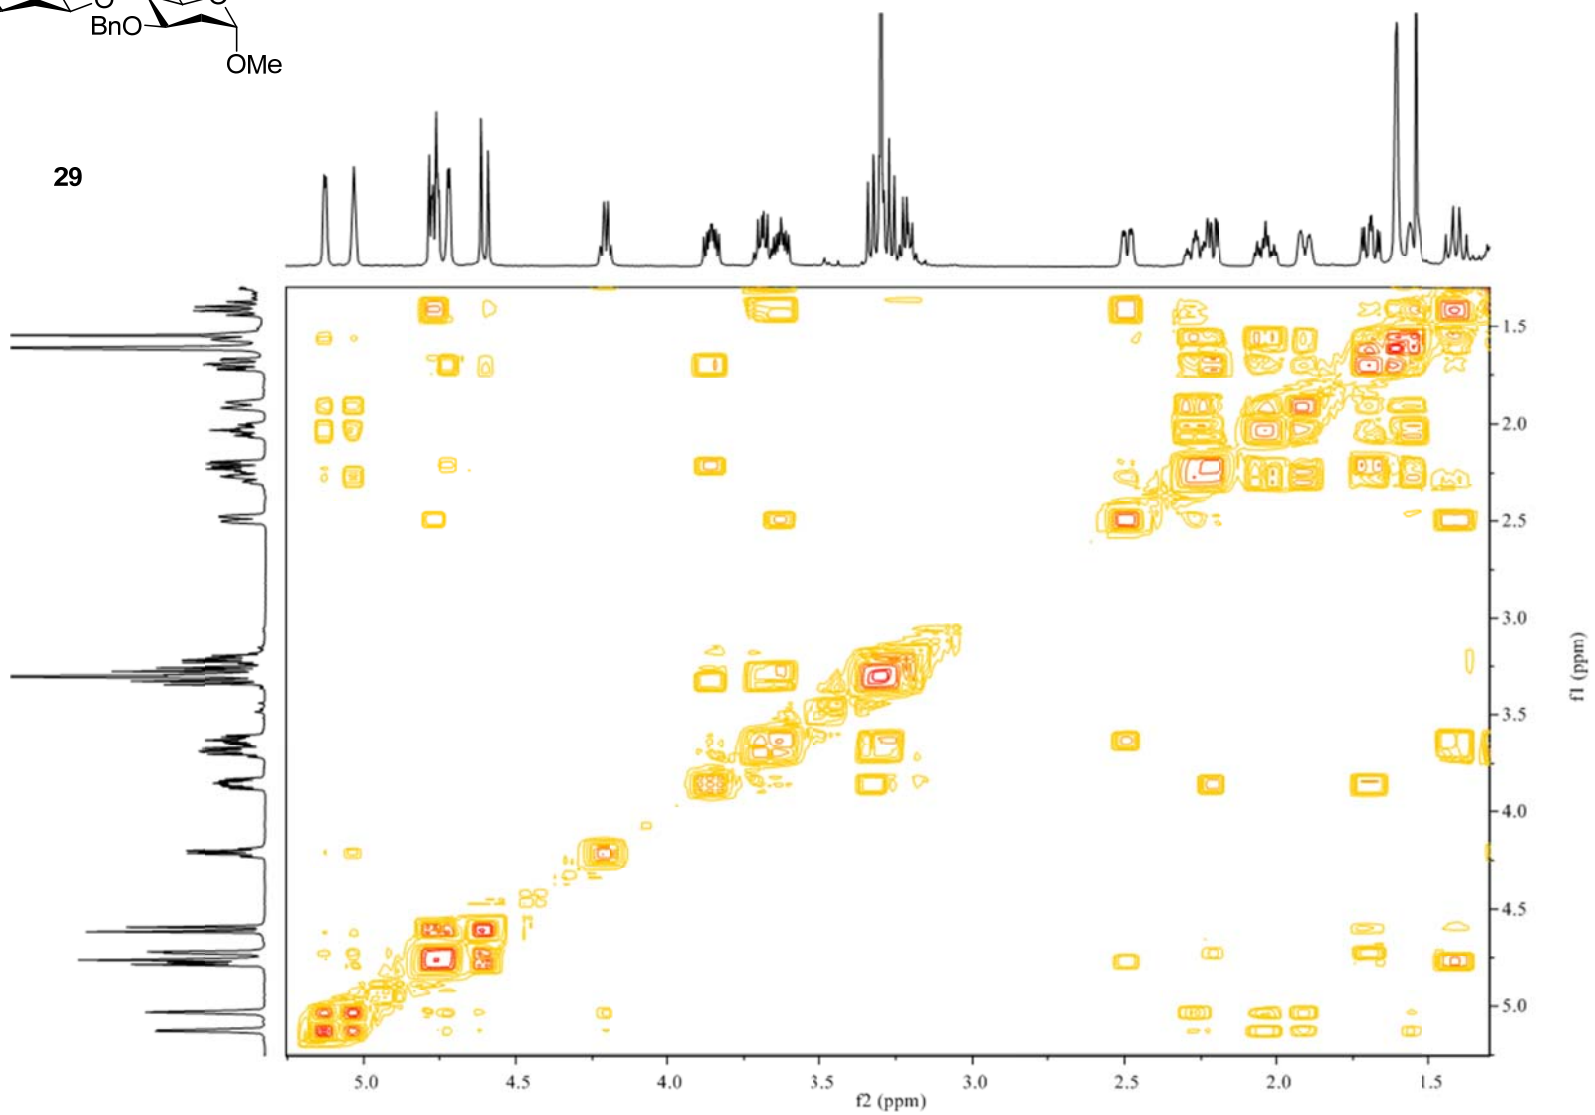



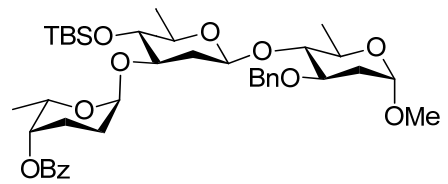

29

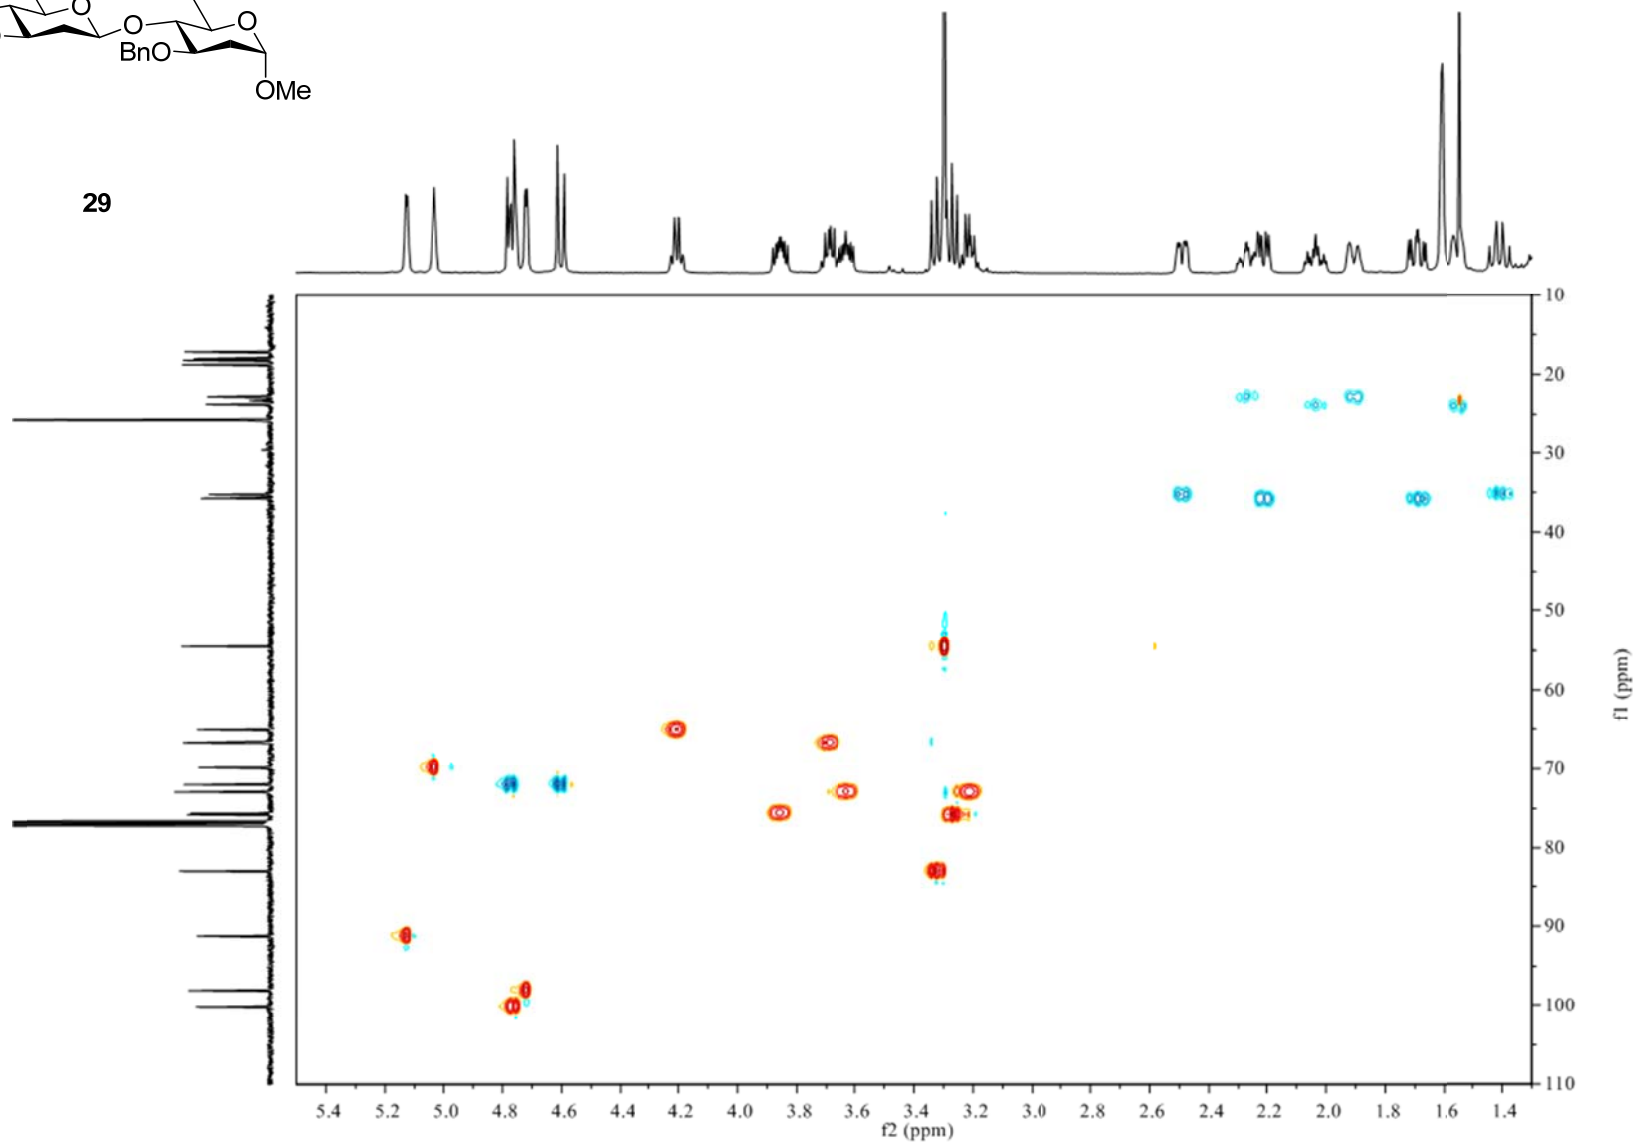

Supplement: c4cc08465a1.pdf [file c4cc08465a1.pdf]
